# Supplementary material for: Insights into the NHC-catalyzed cascade Michael/aldol/lactamization reaction: mechanism and origin of stereoselectivity
Source: Royal Society of Chemistry journal article supplement (doi:10.1039/c8qo00398j), 2018-01-01
Supplement: c8qo00398j1.pdf [file c8qo00398j1.pdf]

## Electronic Supplementary Information for

### Insights into the NHC-catalyzed cascade Michael/aldol/lactamization reaction: mechanism and origin of stereoselectivity

Yang Wang,<sup>a</sup> Shou-Ren Zhang,<sup>b</sup> Yanyan Wang,<sup>c</sup> Ling-Bo Qu<sup>\*,c</sup> and Donghui Wei<sup>\*,c</sup>

<sup>a</sup> Department of Material and Chemical Engineering, Zhengzhou University of Light Industry, Zhengzhou, Henan Province, 450002, P.R. China

<sup>b</sup> Henan Provincial Key Laboratory of Nanocomposites and Applications, Institute of Nanostructured Functional Materials, Huanghe Science and Technology College, Zhengzhou, Henan 450006, China

<sup>c</sup> College of Chemistry and Molecular Engineering, Zhengzhou University, Zhengzhou, Henan Province, 450001, P.R. China

## Contents

|                                                                                     |     |
|-------------------------------------------------------------------------------------|-----|
| 1. Computational details.....                                                       | S2  |
| 2. Global reactivity index (GRI) analysis.....                                      | S3  |
| 3. Parr function analysis.....                                                      | S4  |
| 4. Gibbs free energy profiles of the direct [1,2]-proton transfer pathways.....     | S5  |
| 5. Gibbs free energy profiles of the other three pathways.....                      | S6  |
| 6. Different conformations of TS3s.....                                             | S7  |
| 7. Single-point energies of all the stationary points.....                          | S8  |
| 8. Cartesian coordinates of all the stationary points involved in the reaction..... | S10 |

---

\* Corresponding Authors: [qulingbo@zzu.edu.cn](mailto:qulingbo@zzu.edu.cn) (Q.-B. Qu) and [donghuiwei@zzu.edu.cn](mailto:donghuiwei@zzu.edu.cn) (D. Wei)

# 1. Computational details

All the theoretical calculations were performed by using the Gaussian 09 software by using density functional theory. The geometrical structures were optimized in the DCM solvent ( $\epsilon=8.93$ ) using the integral equation formalism polarizable continuum model (IEF-PCM) at M06-2X/6-31G(d, p) level. Correspondingly, vibrational frequency calculations at the same level of theory were performed to reveal that the reactants, catalyst, intermediates, and products have no imaginary frequencies and the transition states have one and only one imaginary frequency. In addition, IRC calculations were also performed to confirm that the transition states indeed connected the correct reactant and product in each elementary step. Furthermore, we have then refined the energy by carrying out the single-point energy calculations at M06-2X-GD3/6-311++G(2df, 2pd)//IEF-PCM<sub>DCM</sub> level based on the M06-2X/6-31G(d, p)//IEF-PCM<sub>DCM</sub> optimized structures. The energies discussed in this work were obtained by the addition of a thermal correction at the M06-2X/6-31G(d, p)//IEF-PCM<sub>DCM</sub> level to the corresponding single-point energy at the M06-2X-GD3/6-311++G(2df, 2pd)//IEF-PCM<sub>DCM</sub> level.

Moreover, the atom charge and the discussed 3D-structures were employed and rendered by the natural bond orbital (NBO) and the CYLView software, respectively. The non-covalent interaction (NCI) analysis was plotted using the NCIPLOT software developed by Yang's group to distinguish efficient interactions in the stereoselective transition states. Additionally, the extent of enantioselectivity, in terms of enantiomeric excess (ee %), was also calculated by using the Boltzmann distribution of diastereomeric transition states with the following equation:

$$\frac{[R]}{[S]} = \frac{\exp(-G_{[R]}^\ddagger / RT)}{\exp(-G_{[S]}^\ddagger / RT)} = \exp(\Delta G^\ddagger / RT) \quad (1)$$

$$ee = \frac{[R] - [S]}{[R] + [S]} \times 100\% = \frac{\frac{[R]}{[S]} - 1}{\frac{[R]}{[S]} + 1} \times 100\% \quad (2)$$

where  $G^\ddagger$  is the Gibbs free energy barrier of the competing diastereomeric transition state and  $\Delta G^\ddagger$  is the Gibbs free energy difference between the two diastereomeric transition states.

## 2. Global reactivity index (GRI) analysis

Based on Domingo's definition, a molecule's global electrophilic character was described using the electrophilicity index  $\omega = \mu^2/2\eta$ . The  $\mu$  and  $\eta$  were the electronic chemical potential and chemical hardness, respectively. Both characters can be obtained in terms of the energy of the highest occupied molecular orbital HOMO ( $E_H$ ) and the lowest unoccupied molecular orbital LUMO ( $E_L$ ), as  $\mu = (E_H + E_L)/2$  and  $\eta = (E_L - E_H)$ . Also, the nucleophilicity index  $N$  was defined to produce a nucleophilicity scale. The nucleophilicity index was obtained by  $N = E_{H(SR)} - E_{H(TCNE)}$ . For this nucleophilicity scale, tetracyanoethylene was taken as reference.

### 3. Parr function analysis

Pioneered by Domingo and coworkers, the nucleophilic ( $P_k^-$ ) and electrophilic ( $P_k^+$ ) Parr functions which allow for the characterization of the nucleophilic and electrophilic sites of a molecule, can be obtained through the analysis of Mulliken atomic spin density (ASD) of the corresponding radical cations (RC) or anions (RA) of the studied molecules, separately. According to Domingo's definition, the Parr functions can be expressed by the following equations:

$$P^- (r) = \rho_s^{rc} (r) \text{ for the electrophilic attacks} \quad (3)$$

$$P^+ (r) = \rho_s^{ra} (r) \text{ for the nucleophilic attacks} \quad (4)$$

where  $\rho_s^{rc}(r)$  is the ASD of the radical cation and  $\rho_s^{ra}(r)$  is the ASD of the radical anion. Each ASD condensed at the different atoms of the radical cation and radical anion provides the local nucleophilic  $P_k^-$  and electrophilic  $P_k^+$  Parr functions of the neutral system, respectively.

## 4. Gibbs free energy profiles of the direct [1,2]-proton transfer pathways

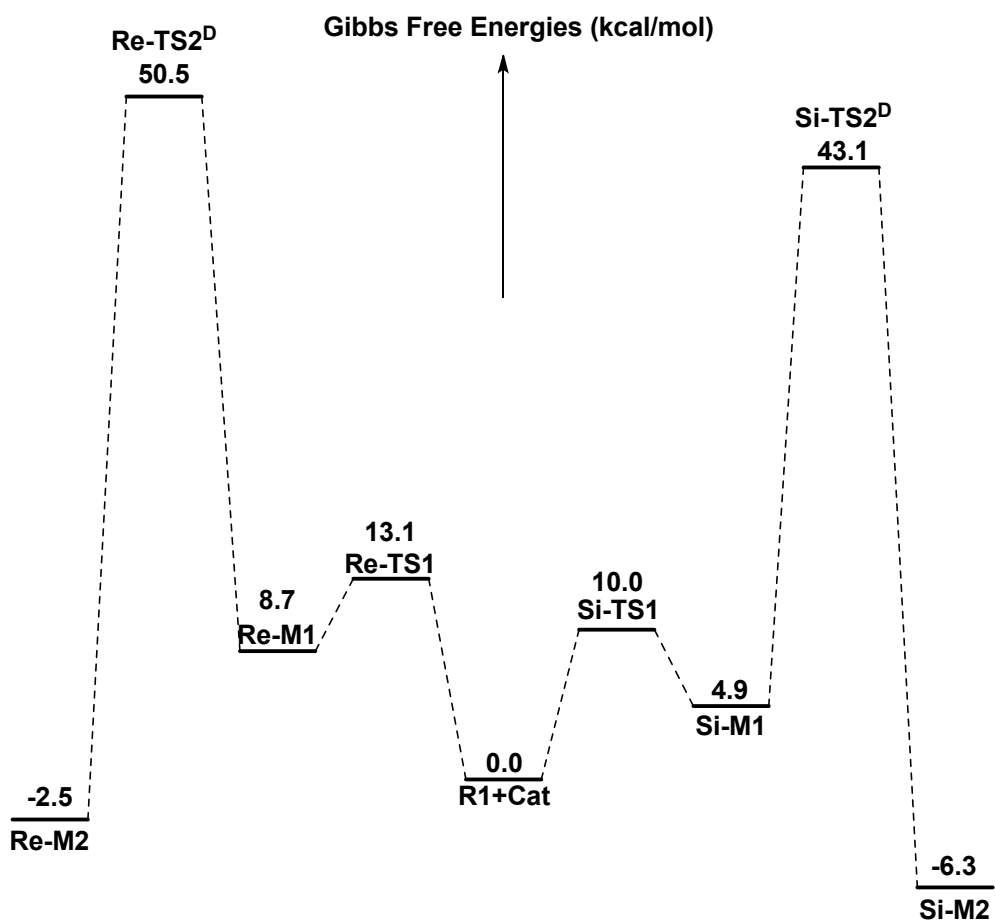

Fig. S1 The energy profiles of the direct [1,2]-proton transfer pathways

## 5. Gibbs free energy profiles of the other three pathways

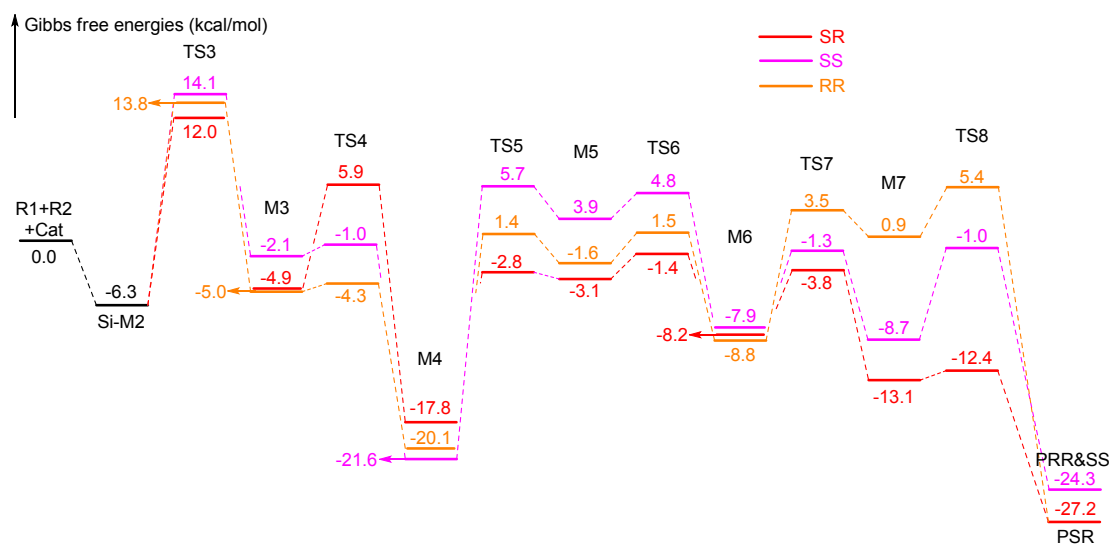

Fig. S2 Gibbs free energy profiles of the other three pathways of the catalytic cycle

## 6. Different conformations of TS3s

**Table S1** Different conformations of the transition states involved in C-C bond formation step

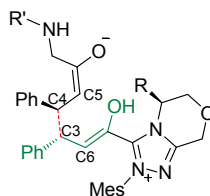

|                | RR   | RS  | SR  | SS  |
|----------------|------|-----|-----|-----|
| <b>TS3</b>     | 0.0  | 0.0 | 0.0 | 0.0 |
| <b>TS3-90</b>  | –    | –   | –   | –   |
| <b>TS3-180</b> | 10.6 | 5.2 | 1.6 | 4.7 |
| <b>TS3-270</b> | 6.9  | 1.5 | 6.0 | 6.1 |

We have additionally considered and investigated the different conformations of **TS3s** in the C–C bond formation step in the revised manuscript. By rotating dihedral angle  $\Phi_1(\text{C6-C3-C4-C5})$  from  $0\sim 360^\circ$  at intervals of  $90^\circ$  in the four transition states **TS3RR**, **TS3RS**, **TS3SR**, and **TS3SS**, we have constructed sixteen ( $4\times 4=16$ ) initial structures of **TS3s** and located the twelve conformations after the optimization, which are summarized in **Table S1**. As an important note, the initial structures by rotating the dihedral  $\Phi_1$  with  $90^\circ$  would lead to the same conformations of those with  $\Phi_1=0/360^\circ$  after the structural optimizations. The relative Gibbs free energies depicted in **Table S1** show that the original conformations of the transition states **TS3RR**, **TS3RS**, **TS3SR**, and **TS3SS** indeed have the lowest energies among their conformers, and thus we only discussed them in the main text.

## 7. Single-point energies of all the stationary points

**Table S2** Single-point energies of all the stationary points involved in the reaction calculated at M06-2X-GD3/6-311++G(2df, 2pd)/IEF-PCM<sub>DCM</sub> level

|                           |              |              |              |
|---------------------------|--------------|--------------|--------------|
| <b>R1</b>                 | -422.934873  | <b>Re-M2</b> | -1475.202087 |
| <b>R2</b>                 | -785.553891  | <b>Si-M2</b> | -1475.207245 |
| <b>Cat</b>                | -1052.237228 | <b>TS3RR</b> | -2260.756876 |
| <b>tBuOH</b>              | -233.650877  | <b>TS3RS</b> | -2260.76907  |
| <b>DBU</b>                | -462.042257  | <b>TS3SR</b> | -2260.761416 |
| <b>DBU·H<sup>+</sup></b>  | -462.511059  | <b>TS3SS</b> | -2260.759062 |
| <b>Re-TS1</b>             | -1475.172096 | <b>M3RR</b>  | -2260.788876 |
| <b>Si-TS1</b>             | -1475.177971 | <b>M3RS</b>  | -2260.787149 |
| <b>Re-M1</b>              | -1475.183951 | <b>M3SR</b>  | -2260.774042 |
| <b>Si-M1</b>              | -1475.190816 | <b>M3SS</b>  | -2260.782288 |
| <b>Re-M02-tBuOH</b>       | -1708.857042 | <b>TS4RR</b> | -2260.788467 |
| <b>Re-M02-DBU</b>         | -1937.270285 | <b>TS4RS</b> | -2260.785979 |
| <b>Re-M02-DBUH</b>        | -1937.738276 | <b>TS4SR</b> | -2260.781934 |
| <b>Re-TS2-tBuOH</b>       | -1708.825059 | <b>TS4SS</b> | -2260.779943 |
| <b>Re-TS2-DBU</b>         | -1937.214813 | <b>M4RR</b>  | -2260.818201 |
| <b>Re-TS2-DBUH</b>        | -1937.709082 | <b>M4RS</b>  | -2260.818583 |
| <b>Si-M02-tBuOH</b>       | -1708.864333 | <b>M4SR</b>  | -2260.813841 |
| <b>Si-M02-DBU</b>         | -1937.274865 | <b>M4SS</b>  | -2260.817916 |
| <b>Si-M02-DBUH</b>        | -1937.740265 | <b>TS5RR</b> | -2260.780465 |
| <b>Si-TS2-tBuOH</b>       | -1708.83203  | <b>TS5RS</b> | -2260.794649 |
| <b>Si-TS2-DBU</b>         | -1937.22162  | <b>TS5SR</b> | -2260.786187 |
| <b>Si-TS2-DBUH</b>        | -1937.715076 | <b>TS5SS</b> | -2260.77361  |
| <b>Re-TS2<sup>D</sup></b> | -1475.117878 | <b>M5RR</b>  | -2260.787839 |
| <b>Si-TS2<sup>D</sup></b> | -1475.12396  | <b>M5RS</b>  | -2260.791596 |



Continued

|              |              |               |              |
|--------------|--------------|---------------|--------------|
| <b>M5SR</b>  | -2260.788849 | <b>M7RR</b>   | -2260.77977  |
| <b>M5SS</b>  | -2260.77659  | <b>M7RS</b>   | -2260.818115 |
| <b>TS6RR</b> | -2260.776578 | <b>M7SR</b>   | -2260.805155 |
| <b>TS6RS</b> | -2260.784623 | <b>M7SS</b>   | -2260.78847  |
| <b>TS6SR</b> | -2260.778562 | <b>TS8RR</b>  | -2260.776704 |
| <b>TS6SS</b> | -2260.774024 | <b>TS8RS</b>  | -2260.807383 |
| <b>M6RR</b>  | -2260.79746  | <b>TS8SR</b>  | -2260.801935 |
| <b>M6RS</b>  | -2260.809846 | <b>TS8SS</b>  | -2260.769001 |
| <b>M6SR</b>  | -2260.795473 | <b>PRR</b>    | -1208.559692 |
| <b>M6SS</b>  | -2260.799509 | <b>PRS</b>    | -1208.559886 |
| <b>TS7RR</b> | -2260.783058 | <b>PSR</b>    | -1208.559886 |
| <b>TS7RS</b> | -2260.803085 | <b>PSS</b>    | -1208.559692 |
| <b>TS7SR</b> | -2260.78607  | <b>TS6RS'</b> | -2260.768209 |
| <b>TS7SS</b> | -2260.784378 | <b>M6RS'</b>  | -2260.781161 |

## 8. Cartesian coordinates of all the stationary points involved in the reaction

### R1

|   |             |             |             |
|---|-------------|-------------|-------------|
| C | -3.40868200 | 0.38467900  | -0.00002100 |
| O | -3.84922700 | -0.74897600 | 0.00001800  |
| H | -4.09882800 | 1.24931300  | 0.00004800  |
| C | -1.97271400 | 0.71939000  | -0.00000900 |
| C | -1.05272300 | -0.25948400 | -0.00000400 |
| H | -1.71185800 | 1.77329500  | -0.00001300 |
| H | -1.42980200 | -1.28220100 | -0.00000900 |
| C | 0.40445300  | -0.11249400 | -0.00000300 |
| C | 1.19488900  | -1.26994600 | -0.00000500 |
| C | 1.04080300  | 1.13825700  | 0.00000300  |
| C | 2.58320700  | -1.18499600 | 0.00000000  |
| H | 0.70997200  | -2.24230900 | -0.00000800 |
| C | 2.42610900  | 1.22321300  | 0.00000400  |
| H | 0.45077600  | 2.04914100  | 0.00000600  |
| C | 3.20171500  | 0.06230300  | 0.00000300  |
| H | 3.18064400  | -2.09057900 | 0.00000200  |
| H | 2.90602800  | 2.19642100  | 0.00001100  |
| H | 4.28453900  | 0.13319200  | 0.00000600  |

### R2

|   |            |             |             |
|---|------------|-------------|-------------|
| C | 3.62993600 | 0.50242200  | 0.00003400  |
| C | 3.20525200 | -0.85335300 | -0.00006000 |
| C | 4.17507200 | -1.87538800 | -0.00006600 |
| C | 5.51000100 | -1.52593200 | 0.00001600  |
| C | 5.90988700 | -0.16904300 | 0.00011000  |

|   |             |             |             |
|---|-------------|-------------|-------------|
| C | 4.98709400  | 0.85831500  | 0.00012100  |
| C | 1.39214100  | 0.48238500  | -0.00004600 |
| C | 1.77738700  | -0.84075700 | -0.00013600 |
| H | 3.87162800  | -2.91777600 | -0.00014000 |
| H | 6.27037000  | -2.29996200 | 0.00001000  |
| H | 6.96870700  | 0.06903400  | 0.00017400  |
| H | 5.29490400  | 1.89854600  | 0.00019400  |
| H | 1.12632800  | -1.70270900 | -0.00022300 |
| N | 2.51025300  | 1.28378500  | 0.00002700  |
| H | 2.45535000  | 2.29210300  | 0.00008500  |
| C | 0.07520100  | 1.13836400  | -0.00004300 |
| O | 0.01763200  | 2.36447900  | -0.00010300 |
| C | -1.12298900 | 0.27531200  | -0.00002200 |
| C | -2.34122500 | 0.83815300  | -0.00001600 |
| H | -0.97749800 | -0.79969900 | -0.00001400 |
| H | -2.37225700 | 1.92730500  | -0.00002500 |
| C | -3.63842500 | 0.15756600  | 0.00000500  |
| C | -4.80190400 | 0.93881300  | 0.00000900  |
| C | -3.76514400 | -1.23995400 | 0.00002600  |
| C | -6.05962700 | 0.34488100  | 0.00003300  |
| H | -4.71185000 | 2.02158800  | -0.00000700 |
| C | -5.02019800 | -1.83287900 | 0.00004900  |
| H | -2.87905700 | -1.86673200 | 0.00002200  |
| C | -6.17137100 | -1.04279600 | 0.00005300  |
| H | -6.95038600 | 0.96425500  | 0.00003600  |
| H | -5.10488500 | -2.91461600 | 0.00006500  |
| H | -7.15071900 | -1.51032500 | 0.00007100  |

Cat

|   |             |            |             |
|---|-------------|------------|-------------|
| C | -3.78315900 | 0.57348400 | -0.37315100 |
|---|-------------|------------|-------------|

|   |             |             |             |
|---|-------------|-------------|-------------|
| C | -2.93275300 | 0.62429600  | 0.73392500  |
| C | -2.74379600 | 1.80356900  | 1.44450800  |
| C | -3.43242000 | 2.94467800  | 1.03620500  |
| C | -4.29135100 | 2.89655400  | -0.06400000 |
| C | -4.47240600 | 1.71213100  | -0.77712700 |
| C | -3.78730300 | -0.80545000 | -0.98394000 |
| C | -3.22858600 | -1.67038600 | 0.16725300  |
| C | -2.30593000 | -0.72646700 | 0.98128800  |
| H | -2.06951200 | 1.83115800  | 2.29430000  |
| H | -3.30419100 | 3.87611200  | 1.57796200  |
| H | -4.82589200 | 3.79178700  | -0.36581200 |
| H | -5.14087400 | 1.68050900  | -1.63231700 |
| H | -3.12846200 | -0.82931200 | -1.86003200 |
| H | -4.05742100 | -1.95361200 | 0.82067700  |
| H | -4.77448600 | -1.14303600 | -1.30692200 |
| H | -2.26773000 | -0.99922700 | 2.03854700  |
| N | -0.94311500 | -0.80531700 | 0.44599700  |
| O | -2.61582000 | -2.88974800 | -0.19796800 |
| C | 0.10052300  | 0.00658200  | 0.81300800  |
| C | -0.53606500 | -1.74167000 | -0.46833800 |
| N | 1.07813100  | -0.51827100 | 0.04685100  |
| N | 0.72268200  | -1.59150800 | -0.74724300 |
| C | -1.48404400 | -2.75306500 | -1.03491400 |
| H | -1.77156800 | -2.46892700 | -2.05540300 |
| H | -1.00129400 | -3.73066100 | -1.08190900 |
| C | 2.43007600  | -0.05145600 | -0.00273900 |
| C | 2.69982800  | 1.16298200  | -0.64004300 |
| C | 3.43283800  | -0.82892300 | 0.58244100  |
| C | 4.02449900  | 1.59739500  | -0.67585400 |
| C | 4.74378100  | -0.35790100 | 0.51658500  |

|   |            |             |             |
|---|------------|-------------|-------------|
| C | 5.05772600 | 0.84895000  | -0.10991400 |
| H | 4.25465300 | 2.54170400  | -1.16376400 |
| H | 5.53740200 | -0.94558900 | 0.97225700  |
| C | 3.09558200 | -2.12388200 | 1.27205100  |
| H | 2.75659900 | -2.87412400 | 0.55209000  |
| H | 2.28358300 | -1.97929200 | 1.99142200  |
| H | 3.96550000 | -2.51678500 | 1.80121200  |
| C | 6.48636000 | 1.32153500  | -0.19808800 |
| H | 6.95558100 | 0.96293600  | -1.12017800 |
| H | 7.07915500 | 0.94846100  | 0.64029100  |
| H | 6.54264900 | 2.41255800  | -0.20314400 |
| C | 1.59116300 | 1.96882900  | -1.26348500 |
| H | 0.87720200 | 2.30157600  | -0.50505200 |
| H | 1.03109500 | 1.36443000  | -1.98408800 |
| H | 1.99331700 | 2.84225900  | -1.77966200 |

tBuOH

|   |             |             |             |
|---|-------------|-------------|-------------|
| C | 0.67343200  | 1.25812700  | -0.52218800 |
| C | -0.00572900 | -0.00000300 | 0.01760500  |
| H | 0.19850000  | 2.14986400  | -0.10406500 |
| H | 1.73401000  | 1.26931800  | -0.24728800 |
| H | 0.60703400  | 1.30367900  | -1.61310800 |
| C | 0.67535200  | -1.25696700 | -0.52244800 |
| C | -1.49027100 | -0.00110000 | -0.32563100 |
| H | 0.20193600  | -2.14953100 | -0.10437700 |
| H | 0.60883900  | -1.30247400 | -1.61336200 |
| H | 1.73601100  | -1.26651600 | -0.24777800 |
| H | -1.63495300 | -0.00062900 | -1.40911500 |
| H | -1.97176100 | -0.88945700 | 0.09248700  |
| H | -1.97324800 | 0.88599200  | 0.09345700  |

|     |             |             |             |
|-----|-------------|-------------|-------------|
| O   | 0.04948400  | -0.00008300 | 1.44604100  |
| H   | 0.98104900  | 0.00006800  | 1.70079700  |
| DBU |             |             |             |
| C   | 2.78413000  | -0.05200700 | 0.34619000  |
| C   | 1.89212800  | -1.28076600 | 0.52457300  |
| C   | 0.85127500  | -1.44033500 | -0.59085000 |
| C   | 2.03933200  | 1.28290300  | 0.34443100  |
| C   | 0.94968400  | 1.40161900  | -0.73528700 |
| C   | -0.34015300 | 0.72000800  | -0.33235000 |
| H   | 3.32227800  | -0.15359500 | -0.60654000 |
| H   | 1.37059400  | -1.24155000 | 1.48980400  |
| H   | 0.53385300  | -2.48444100 | -0.65079500 |
| H   | 2.76706200  | 2.08698100  | 0.19384300  |
| H   | 1.32199100  | 1.01138100  | -1.69009900 |
| C   | -1.51540400 | -1.36420800 | 0.14705000  |
| H   | -1.36606600 | -1.57171000 | 1.21814200  |
| C   | -2.53476200 | 0.85820100  | 0.52702900  |
| C   | -2.76950000 | -0.53011600 | -0.05652900 |
| H   | -3.62822000 | -1.01737700 | 0.41329300  |
| H   | -2.97250900 | -0.44911300 | -1.12987700 |
| H   | -2.51803200 | 0.79783600  | 1.62475300  |
| H   | -1.60367500 | -2.32808800 | -0.36385100 |
| H   | -3.36763600 | 1.52229500  | 0.27109100  |
| N   | -1.29748800 | 1.48025800  | 0.06975800  |
| N   | -0.36695200 | -0.65738400 | -0.40868300 |
| H   | 1.31042700  | -1.20171100 | -1.55848400 |
| H   | 2.52469600  | -2.17504600 | 0.54008300  |
| H   | 3.54544600  | -0.03722500 | 1.13362600  |
| H   | 1.57723100  | 1.45798200  | 1.32424700  |

|                    |             |             |             |
|--------------------|-------------|-------------|-------------|
| H                  | 0.69326100  | 2.45147600  | -0.88230700 |
| DBU•H <sup>+</sup> |             |             |             |
| C                  | 2.83746700  | -0.01137200 | 0.29230200  |
| C                  | 1.99719700  | -1.27214600 | 0.49249200  |
| C                  | 0.90249500  | -1.45898300 | -0.55873100 |
| C                  | 2.05100800  | 1.29735400  | 0.35130400  |
| C                  | 0.93965800  | 1.40212400  | -0.71112600 |
| C                  | -0.29884700 | 0.65238500  | -0.31002400 |
| H                  | 3.33918300  | -0.07620500 | -0.68195100 |
| H                  | 1.53526500  | -1.27930400 | 1.48723900  |
| H                  | 0.57784100  | -2.49913300 | -0.58151900 |
| H                  | 2.73764200  | 2.13222000  | 0.19006600  |
| H                  | 1.29410300  | 1.02065300  | -1.67436700 |
| C                  | -1.51354300 | -1.40956100 | 0.14257200  |
| H                  | -1.40715000 | -1.66686000 | 1.20223200  |
| C                  | -2.61649000 | 0.78417400  | 0.52089300  |
| C                  | -2.76925500 | -0.59056500 | -0.10678700 |
| H                  | -3.62936800 | -1.10504000 | 0.32392200  |
| H                  | -2.93497000 | -0.48865900 | -1.18284200 |
| H                  | -2.60590300 | 0.72125400  | 1.61337600  |
| H                  | -1.54316200 | -2.33611800 | -0.43268600 |
| H                  | -3.42219600 | 1.45386400  | 0.21955400  |
| N                  | -1.35455200 | 1.36203700  | 0.05894400  |
| N                  | -0.31343200 | -0.66866000 | -0.28565400 |
| H                  | 1.27285300  | -1.21486500 | -1.55989700 |
| H                  | 2.65448500  | -2.14527800 | 0.44180000  |
| H                  | 3.62696100  | 0.01715400  | 1.04901600  |
| H                  | 1.61155400  | 1.43734900  | 1.34573500  |
| H                  | 0.66273000  | 2.44694200  | -0.86533100 |

|   |             |            |            |
|---|-------------|------------|------------|
| H | -1.27211000 | 2.36793900 | 0.01525500 |
|---|-------------|------------|------------|

Re-TS1

|   |             |             |             |
|---|-------------|-------------|-------------|
| C | 0.59235400  | 1.08061700  | -1.36744200 |
| O | 0.86892300  | 0.32927500  | -2.33071600 |
| H | 1.34919100  | 1.79306300  | -0.97822400 |
| C | -0.81015800 | 1.58958400  | -1.20073300 |
| C | -1.09821800 | 2.70624700  | -0.52608500 |
| H | -1.57763300 | 1.00151500  | -1.70365200 |
| H | -0.26971800 | 3.26418500  | -0.08505600 |
| C | -2.43546900 | 3.27780300  | -0.30061000 |
| C | -2.54334700 | 4.57117000  | 0.22618100  |
| C | -3.61489200 | 2.57036600  | -0.57842200 |
| C | -3.78779200 | 5.15043900  | 0.45489100  |
| H | -1.63751100 | 5.12637900  | 0.45471700  |
| C | -4.85801800 | 3.14775600  | -0.34982800 |
| H | -3.56098900 | 1.55761500  | -0.96846500 |
| C | -4.95044100 | 4.44085400  | 0.16571200  |
| H | -3.84942200 | 6.15522600  | 0.86052500  |
| H | -5.75987300 | 2.58566500  | -0.57061800 |
| H | -5.92281700 | 4.88832000  | 0.34415100  |
| C | -2.98606000 | -2.83987800 | -0.00422400 |
| C | -2.01429100 | -1.94212600 | -0.43854100 |
| C | -1.54165600 | -1.94760900 | -1.74864700 |
| C | -2.08871800 | -2.87382000 | -2.63599800 |
| C | -3.07584000 | -3.76809800 | -2.21395800 |
| C | -3.52940700 | -3.76077800 | -0.89609100 |
| C | -3.29155000 | -2.64814200 | 1.45982000  |
| C | -2.20051300 | -1.68303200 | 1.97990400  |
| C | -1.56983600 | -1.03966800 | 0.69189000  |



|   |             |             |             |
|---|-------------|-------------|-------------|
| H | -0.75689900 | -1.25992500 | -2.06764700 |
| H | -1.74030900 | -2.90470200 | -3.66326800 |
| H | -3.48648700 | -4.48432000 | -2.91862700 |
| H | -4.28474300 | -4.46867700 | -0.56778100 |
| H | -3.26776600 | -3.58102000 | 2.03124000  |
| H | -2.62327800 | -0.90592200 | 2.61744200  |
| H | -4.28400000 | -2.20749400 | 1.59988900  |
| H | -1.92493400 | -0.01366000 | 0.56360600  |
| N | -0.11857900 | -0.98314100 | 0.79427300  |
| O | -1.24867600 | -2.33407300 | 2.81142900  |
| C | 0.74786500  | -0.08858300 | 0.26319800  |
| C | 0.58145200  | -1.98949700 | 1.40737500  |
| N | 1.93285600  | -0.61117200 | 0.59893200  |
| N | 1.86051200  | -1.78532600 | 1.31886100  |
| C | -0.21568800 | -3.02604300 | 2.12891100  |
| H | -0.61883500 | -3.76840600 | 1.42639600  |
| H | 0.39427700  | -3.53562200 | 2.87448800  |
| C | 3.20899500  | -0.03508600 | 0.29039200  |
| C | 3.95354600  | -0.58448200 | -0.75721200 |
| C | 3.64432100  | 1.05728500  | 1.04225300  |
| C | 5.18965300  | -0.00614000 | -1.03596400 |
| C | 4.88673800  | 1.60563300  | 0.72170400  |
| C | 5.67126900  | 1.08457400  | -0.30695400 |
| H | 5.78892200  | -0.41106600 | -1.84820400 |
| H | 5.24766900  | 2.45862800  | 1.29102000  |
| C | 2.79178100  | 1.62627400  | 2.14551400  |
| H | 2.47372600  | 0.84346500  | 2.84059400  |
| H | 1.88427700  | 2.08717000  | 1.74065500  |
| H | 3.34150300  | 2.38562000  | 2.70386300  |
| C | 7.02191300  | 1.67260500  | -0.62488900 |

|   |            |             |             |
|---|------------|-------------|-------------|
| H | 7.82278400 | 1.01577100  | -0.27077900 |
| H | 7.15221700 | 2.64715400  | -0.15020000 |
| H | 7.15269500 | 1.79368100  | -1.70345900 |
| C | 3.40487600 | -1.73327600 | -1.55881000 |
| H | 2.45283000 | -1.43304200 | -2.00961800 |
| H | 3.22137300 | -2.60491100 | -0.92373800 |
| H | 4.10105300 | -2.01854200 | -2.34941800 |

Si-TS1

|   |             |             |             |
|---|-------------|-------------|-------------|
| C | 0.04176900  | 1.55712400  | -0.78903200 |
| O | 0.26464400  | 2.20455400  | 0.25755100  |
| H | 0.71230700  | 1.68606100  | -1.66290300 |
| C | -1.35652900 | 1.19048200  | -1.19359100 |
| C | -2.40345700 | 1.63568500  | -0.49280100 |
| H | -1.46173300 | 0.59213800  | -2.09734400 |
| H | -2.17836500 | 2.24827500  | 0.37971000  |
| C | -3.82751300 | 1.40773700  | -0.78132200 |
| C | -4.78689000 | 2.16843800  | -0.10109400 |
| C | -4.27221500 | 0.46309200  | -1.71836800 |
| C | -6.14583200 | 2.01730300  | -0.36618400 |
| H | -4.45594700 | 2.89473300  | 0.63676900  |
| C | -5.62763000 | 0.30547200  | -1.98011600 |
| H | -3.54993000 | -0.16754600 | -2.22957300 |
| C | -6.57136300 | 1.08779900  | -1.31148100 |
| H | -6.87076500 | 2.62414900  | 0.16722500  |
| H | -5.95339600 | -0.43238600 | -2.70692100 |
| H | -7.62916300 | 0.96391300  | -1.52016100 |
| C | 5.36308700  | 0.64874600  | -0.42747400 |
| C | 3.99958000  | 0.92061300  | -0.34787000 |
| C | 3.50373100  | 1.96966800  | 0.42082100  |

|   |             |             |             |
|---|-------------|-------------|-------------|
| C | 4.41903700  | 2.75532400  | 1.11951800  |
| C | 5.78936400  | 2.49212000  | 1.04518100  |
| C | 6.27209600  | 1.43875500  | 0.27110400  |
| C | 5.63250800  | -0.53125300 | -1.32629900 |
| C | 4.24755900  | -1.16639500 | -1.58516100 |
| C | 3.20282400  | -0.05797300 | -1.18460100 |
| H | 2.43206600  | 2.16409600  | 0.47589600  |
| H | 4.06460700  | 3.57943500  | 1.73040700  |
| H | 6.48529700  | 3.11298900  | 1.60070300  |
| H | 7.33720000  | 1.23299200  | 0.22037100  |
| H | 6.30592700  | -1.27139000 | -0.88382700 |
| H | 4.11833400  | -1.44330900 | -2.63205400 |
| H | 6.08209100  | -0.20649700 | -2.27065100 |
| H | 2.78447500  | 0.41373900  | -2.07767500 |
| N | 2.09224500  | -0.64303500 | -0.44480500 |
| O | 4.07635500  | -2.38716500 | -0.87630700 |
| C | 0.77679600  | -0.31113000 | -0.44260500 |
| C | 2.30886400  | -1.65891700 | 0.44826800  |
| N | 0.27768900  | -1.15897500 | 0.46643500  |
| N | 1.20143100  | -2.01456600 | 1.02505700  |
| C | 3.67861100  | -2.25157600 | 0.47920900  |
| H | 4.37324600  | -1.61779000 | 1.04649800  |
| H | 3.65879800  | -3.24695400 | 0.92249600  |
| C | -1.10821200 | -1.25825100 | 0.82219400  |
| C | -1.56699200 | -0.56102400 | 1.93745100  |
| C | -1.94980100 | -1.98970900 | -0.01944100 |
| C | -2.93952400 | -0.58755800 | 2.18896100  |
| C | -3.30970600 | -1.99362000 | 0.27612100  |
| C | -3.82267800 | -1.27908900 | 1.36078400  |
| H | -3.32827800 | -0.03306000 | 3.04008500  |

|   |             |             |             |
|---|-------------|-------------|-------------|
| H | -3.99009900 | -2.54086100 | -0.37275900 |
| C | -1.40052500 | -2.70884000 | -1.22255100 |
| H | -0.55600100 | -3.34907900 | -0.95072400 |
| H | -1.03651800 | -1.99357100 | -1.96818400 |
| H | -2.17076300 | -3.32658900 | -1.68746400 |
| C | -5.30963700 | -1.20838000 | 1.58102600  |
| H | -5.78378500 | -2.17904300 | 1.41330400  |
| H | -5.75024300 | -0.49541600 | 0.87429500  |
| H | -5.54873800 | -0.87446700 | 2.59315900  |
| C | -0.61902800 | 0.24966300  | 2.77830100  |
| H | -0.24234100 | 1.09120600  | 2.18498300  |
| H | 0.23891500  | -0.34926600 | 3.09783600  |
| H | -1.12450600 | 0.63459300  | 3.66604600  |

Re-M1

|   |             |            |             |
|---|-------------|------------|-------------|
| C | 0.51001700  | 0.79686400 | -1.12838700 |
| O | 0.72497100  | 0.03024600 | -2.19854300 |
| H | 1.27151200  | 1.59667200 | -0.93766500 |
| C | -0.85003600 | 1.48711800 | -1.09848700 |
| C | -1.09684400 | 2.63654700 | -0.46355500 |
| H | -1.61805600 | 0.97404800 | -1.67847100 |
| H | -0.26962200 | 3.11857900 | 0.06171600  |
| C | -2.38250000 | 3.35191100 | -0.37945200 |
| C | -2.43047200 | 4.57627800 | 0.29861000  |
| C | -3.56958400 | 2.85406400 | -0.93759000 |
| C | -3.62147600 | 5.28678800 | 0.41637900  |
| H | -1.51849200 | 4.97275800 | 0.73719900  |
| C | -4.75880100 | 3.56350400 | -0.82304600 |
| H | -3.56475500 | 1.90529200 | -1.46602500 |
| C | -4.79119000 | 4.78268000 | -0.14530100 |

|   |             |             |             |
|---|-------------|-------------|-------------|
| H | -3.63491500 | 6.23348000  | 0.94710700  |
| H | -5.66722700 | 3.16296300  | -1.26193400 |
| H | -5.72270000 | 5.33220200  | -0.05627400 |
| C | -2.86236800 | -3.09273300 | 0.06296400  |
| C | -1.96299600 | -2.16387000 | -0.45290200 |
| C | -1.42934000 | -2.27848200 | -1.73442600 |
| C | -1.83665300 | -3.36393900 | -2.50857500 |
| C | -2.74685100 | -4.29886100 | -2.00671200 |
| C | -3.26556900 | -4.17196400 | -0.71943100 |
| C | -3.26995000 | -2.74329400 | 1.47123100  |
| C | -2.34786800 | -1.57244400 | 1.88981300  |
| C | -1.66516700 | -1.07973600 | 0.55746600  |
| H | -0.70581700 | -1.54170200 | -2.09699000 |
| H | -1.43930900 | -3.48784500 | -3.51096300 |
| H | -3.04801900 | -5.13896300 | -2.62470300 |
| H | -3.96496200 | -4.90617500 | -0.33086700 |
| H | -3.15457700 | -3.57591000 | 2.17251900  |
| H | -2.91546500 | -0.75395500 | 2.33245700  |
| H | -4.31839900 | -2.43203200 | 1.51264600  |
| H | -2.06894800 | -0.10841000 | 0.26666800  |
| N | -0.22064000 | -0.91140500 | 0.74207500  |
| O | -1.42376400 | -1.93987100 | 2.90287000  |
| C | 0.66775300  | -0.11000100 | 0.12100900  |
| C | 0.48099000  | -1.73638500 | 1.58209600  |
| N | 1.84944900  | -0.46807000 | 0.62653500  |
| N | 1.75305600  | -1.48010900 | 1.54414300  |
| C | -0.30533200 | -2.67224600 | 2.43813600  |
| H | -0.60573000 | -3.56197800 | 1.86788000  |
| H | 0.28135500  | -2.98287000 | 3.30208800  |
| C | 3.13756700  | 0.06068900  | 0.27078100  |

|   |            |             |             |
|---|------------|-------------|-------------|
| C | 3.86183100 | -0.59779900 | -0.72421900 |
| C | 3.60651400 | 1.18692500  | 0.94997100  |
| C | 5.11903200 | -0.08246600 | -1.03775600 |
| C | 4.86621100 | 1.66544500  | 0.59674200  |
| C | 5.63438300 | 1.04101400  | -0.38931200 |
| H | 5.70673900 | -0.57000200 | -1.81153800 |
| H | 5.25756400 | 2.54422200  | 1.10328900  |
| C | 2.76897900 | 1.85004700  | 2.01061800  |
| H | 2.47998400 | 1.13498700  | 2.78679500  |
| H | 1.84564100 | 2.25834200  | 1.58477400  |
| H | 3.31678000 | 2.66826800  | 2.47978900  |
| C | 7.00898600 | 1.55873700  | -0.72490200 |
| H | 7.75212900 | 1.15067000  | -0.03220800 |
| H | 7.05054000 | 2.64768500  | -0.64716400 |
| H | 7.30372300 | 1.27099500  | -1.73617600 |
| C | 3.27931100 | -1.79356800 | -1.42466100 |
| H | 2.33349900 | -1.49388900 | -1.89341000 |
| H | 3.07534500 | -2.60035300 | -0.71311800 |
| H | 3.96800100 | -2.16793400 | -2.18391400 |

Si-M1

|   |             |             |             |
|---|-------------|-------------|-------------|
| C | -0.12417600 | -1.02220100 | -0.95131400 |
| O | -0.36472100 | -1.99358300 | -0.07212000 |
| H | -0.64135500 | -1.12927700 | -1.94202300 |
| C | 1.33722800  | -0.75499200 | -1.30407000 |
| C | 2.31290100  | -1.47195700 | -0.74574500 |
| H | 1.53605400  | 0.02480100  | -2.04088400 |
| H | 1.99254000  | -2.23697100 | -0.03881900 |
| C | 3.76176900  | -1.32679200 | -0.96315600 |
| C | 4.63165700  | -2.26367500 | -0.39031100 |

|   |             |             |             |
|---|-------------|-------------|-------------|
| C | 4.32163800  | -0.27720000 | -1.70790900 |
| C | 6.01013000  | -2.17467600 | -0.57084200 |
| H | 4.21406000  | -3.07536100 | 0.19990900  |
| C | 5.69622400  | -0.18403000 | -1.88809200 |
| H | 3.67399400  | 0.48246900  | -2.13671100 |
| C | 6.54875400  | -1.13590600 | -1.32532000 |
| H | 6.66264800  | -2.91705900 | -0.12165700 |
| H | 6.10805400  | 0.63664200  | -2.46780700 |
| H | 7.62196800  | -1.06121200 | -1.46864700 |
| C | -5.32055900 | -0.66483300 | -0.38270500 |
| C | -3.96104500 | -0.95814700 | -0.32463700 |
| C | -3.45997900 | -2.00144500 | 0.44902200  |
| C | -4.37164900 | -2.75519500 | 1.18572000  |
| C | -5.73936300 | -2.46941500 | 1.13896700  |
| C | -6.22503500 | -1.42600300 | 0.35345600  |
| C | -5.59443500 | 0.49281400  | -1.30787600 |
| C | -4.20626800 | 1.08765600  | -1.63882600 |
| C | -3.16535900 | -0.01182800 | -1.19742800 |
| H | -2.38533600 | -2.19941700 | 0.45156400  |
| H | -4.01815900 | -3.57526300 | 1.80275100  |
| H | -6.43181700 | -3.06792300 | 1.72278400  |
| H | -7.28814900 | -1.20710500 | 0.32055000  |
| H | -6.23323500 | 1.26322900  | -0.86486400 |
| H | -4.09705300 | 1.29724600  | -2.70296400 |
| H | -6.08766300 | 0.15207900  | -2.22397900 |
| H | -2.73677100 | -0.51179600 | -2.06891600 |
| N | -2.06116100 | 0.60671800  | -0.46134600 |
| O | -3.99706800 | 2.34561400  | -1.01182700 |
| C | -0.75843700 | 0.27124700  | -0.37561100 |
| C | -2.28148800 | 1.65557300  | 0.38961400  |

|   |             |             |             |
|---|-------------|-------------|-------------|
| N | -0.25318000 | 1.12997700  | 0.51438200  |
| N | -1.18841100 | 2.00780500  | 0.99646700  |
| C | -3.63912900 | 2.27548500  | 0.35735800  |
| H | -4.35741400 | 1.68412600  | 0.94066000  |
| H | -3.60553600 | 3.29063200  | 0.75160000  |
| C | 1.11552800  | 1.19753800  | 0.94792900  |
| C | 1.52754300  | 0.34135000  | 1.96719100  |
| C | 1.98003400  | 2.04461200  | 0.25213900  |
| C | 2.89249300  | 0.30840300  | 2.24991800  |
| C | 3.33201800  | 1.97915200  | 0.57651400  |
| C | 3.80647500  | 1.09254600  | 1.54589800  |
| H | 3.25332100  | -0.37310200 | 3.01651400  |
| H | 4.03602100  | 2.60472800  | 0.03277600  |
| C | 1.46619400  | 2.95336900  | -0.83241200 |
| H | 0.68249000  | 3.61646300  | -0.45439200 |
| H | 1.03196400  | 2.37704500  | -1.65722100 |
| H | 2.27431400  | 3.56565800  | -1.23555500 |
| C | 5.28561500  | 0.93363200  | 1.76972400  |
| H | 5.81937900  | 1.87184300  | 1.60004800  |
| H | 5.67939900  | 0.19180100  | 1.06409600  |
| H | 5.50235000  | 0.58500400  | 2.78209400  |
| C | 0.54280500  | -0.56081700 | 2.65662600  |
| H | 0.14046700  | -1.26964800 | 1.91981400  |
| H | -0.29193300 | 0.01313800  | 3.07222200  |
| H | 1.02646100  | -1.10609100 | 3.46917800  |

Re-M02-tBuOH

|   |             |             |             |
|---|-------------|-------------|-------------|
| C | -4.31025000 | -2.10142900 | 0.59332500  |
| C | -3.22961300 | -1.28770600 | 0.25725300  |
| C | -3.32863100 | -0.32725500 | -0.74510400 |



|   |             |             |             |
|---|-------------|-------------|-------------|
| C | -4.55495700 | -0.16420000 | -1.38798000 |
| C | -5.64826200 | -0.95928600 | -1.03812500 |
| C | -5.53215400 | -1.93727500 | -0.05136700 |
| C | -3.92850100 | -3.09525100 | 1.66172300  |
| C | -2.38707500 | -3.05000400 | 1.70718400  |
| C | -2.02093000 | -1.65118400 | 1.09788000  |
| H | -2.47215800 | 0.27885000  | -1.03168200 |
| H | -4.65654400 | 0.58253300  | -2.16839700 |
| H | -6.59542500 | -0.82367000 | -1.54998200 |
| H | -6.37854800 | -2.56825800 | 0.20179400  |
| H | -4.26858900 | -4.11289900 | 1.45209200  |
| H | -2.00325900 | -3.13298400 | 2.72429300  |
| H | -4.34123800 | -2.80231900 | 2.63311400  |
| H | -1.83767300 | -0.93544100 | 1.90355000  |
| N | -0.80890100 | -1.74860200 | 0.29215100  |
| O | -1.79162900 | -4.13799600 | 1.01171300  |
| C | 0.22103200  | -0.89940300 | 0.10629100  |
| C | -0.61038000 | -2.83401600 | -0.51563100 |
| N | 0.99577400  | -1.50010600 | -0.79640000 |
| N | 0.48999500  | -2.71267400 | -1.19312000 |
| C | -1.58207500 | -3.96080500 | -0.37957000 |
| H | -2.51465100 | -3.73956400 | -0.91419100 |
| H | -1.15307200 | -4.88246000 | -0.77116500 |
| C | 2.23028200  | -1.06426400 | -1.40709300 |
| C | 3.41976900  | -1.63227400 | -0.96054300 |
| C | 2.15486700  | -0.15602600 | -2.46263300 |
| C | 4.58879900  | -1.25437900 | -1.62415200 |
| C | 3.34683900  | 0.18743000  | -3.09221200 |
| C | 4.57084700  | -0.35449400 | -2.68850200 |
| H | 5.53591000  | -1.67274700 | -1.29278600 |

|   |             |             |             |
|---|-------------|-------------|-------------|
| H | 3.32178300  | 0.89901200  | -3.91418000 |
| C | 0.83828500  | 0.45845400  | -2.84524300 |
| H | 0.47725800  | 1.07577200  | -2.01460000 |
| H | 0.08157100  | -0.30582700 | -3.05248000 |
| H | 0.94377600  | 1.08746700  | -3.73058600 |
| C | 5.84132800  | 0.01955800  | -3.40790000 |
| H | 5.87779000  | 1.09369100  | -3.60687900 |
| H | 5.90676100  | -0.49403200 | -4.37255700 |
| H | 6.72222700  | -0.25288400 | -2.82312200 |
| C | 3.44619800  | -2.55763000 | 0.22577300  |
| H | 2.70066700  | -3.35193200 | 0.13116400  |
| H | 3.23861300  | -1.98885500 | 1.13944600  |
| H | 4.43039700  | -3.01851500 | 0.32707900  |
| C | 0.51499000  | 0.43612500  | 0.82111800  |
| O | 1.68009800  | 0.94222500  | 0.41063500  |
| C | -0.69467700 | 1.35206200  | 0.63191500  |
| C | -0.55395000 | 2.55453000  | 0.06964200  |
| H | -1.66065600 | 1.01814900  | 1.00798700  |
| H | 0.45694400  | 2.82293300  | -0.23465500 |
| C | -1.61606400 | 3.54589900  | -0.17194000 |
| C | -1.25878300 | 4.81449900  | -0.64586100 |
| C | -2.97715600 | 3.27362700  | 0.03469400  |
| C | -2.22344900 | 5.78585800  | -0.89769100 |
| H | -0.20873400 | 5.03648000  | -0.81621900 |
| C | -3.94166600 | 4.24121200  | -0.21886500 |
| H | -3.29003400 | 2.29445400  | 0.38619400  |
| C | -3.56981100 | 5.50285100  | -0.68429400 |
| H | -1.92211000 | 6.76305600  | -1.26153900 |
| H | -4.98964200 | 4.01016900  | -0.05489100 |
| H | -4.32550300 | 6.25669100  | -0.88004000 |

|   |            |             |            |
|---|------------|-------------|------------|
| H | 2.65975400 | 0.40273900  | 1.45243400 |
| C | 2.15229800 | 1.77179800  | 3.59926000 |
| C | 3.46153800 | 1.17242000  | 3.07182300 |
| H | 1.53827800 | 2.10320100  | 2.75495300 |
| H | 1.59658400 | 1.01438600  | 4.16241700 |
| H | 2.33696500 | 2.62812600  | 4.25680200 |
| C | 4.32131900 | 0.67546300  | 4.23013600 |
| C | 4.21775100 | 2.22687600  | 2.25644000 |
| H | 5.24819600 | 0.23878500  | 3.84594900 |
| H | 4.57582200 | 1.49100000  | 4.91426500 |
| H | 3.78503700 | -0.09672700 | 4.79049000 |
| H | 4.45755900 | 3.11001600  | 2.85800000 |
| H | 5.15002100 | 1.80199800  | 1.87151800 |
| H | 3.59965800 | 2.53391600  | 1.40689000 |
| O | 3.18523500 | 0.05176000  | 2.25430500 |
| H | 0.50202700 | 0.12678700  | 1.89936500 |

Re-M02-DBU

|   |            |            |             |
|---|------------|------------|-------------|
| C | 4.08962100 | 2.65505400 | -1.42205000 |
| C | 3.22018800 | 1.97468800 | -0.57383500 |
| C | 3.43172400 | 1.93900600 | 0.80238400  |
| C | 4.52341800 | 2.62808600 | 1.32635100  |
| C | 5.38714600 | 3.32932500 | 0.48156100  |
| C | 5.18004700 | 3.34321500 | -0.89653900 |
| C | 3.68047600 | 2.50017500 | -2.86468500 |
| C | 2.55163200 | 1.44055600 | -2.86351200 |
| C | 2.11999900 | 1.28679300 | -1.35432800 |
| H | 2.76978200 | 1.36972700 | 1.45038900  |
| H | 4.70783800 | 2.61391700 | 2.39539900  |
| H | 6.23613400 | 3.85804500 | 0.90310100  |

|   |             |             |             |
|---|-------------|-------------|-------------|
| H | 5.86553100  | 3.87385100  | -1.55085700 |
| H | 4.50189100  | 2.16751300  | -3.50716500 |
| H | 1.69562400  | 1.77273800  | -3.45216100 |
| H | 3.31284000  | 3.44646000  | -3.27410000 |
| H | 1.15189100  | 1.77679600  | -1.21992600 |
| N | 1.96101900  | -0.10388500 | -0.97897300 |
| O | 2.94599000  | 0.22418200  | -3.47744300 |
| C | 1.09447300  | -0.71596800 | -0.08039500 |
| C | 2.72374100  | -1.08605400 | -1.55978200 |
| N | 1.37403900  | -2.06844100 | -0.24848600 |
| N | 2.41520200  | -2.26930000 | -1.15852800 |
| C | 3.66876800  | -0.65272600 | -2.62812700 |
| H | 4.54914800  | -0.15641200 | -2.19538800 |
| H | 3.99275300  | -1.50723300 | -3.22124100 |
| C | 1.20448800  | -3.08318000 | 0.74969200  |
| C | 0.32154700  | -4.13516500 | 0.49627800  |
| C | 1.96780000  | -3.02255000 | 1.92018700  |
| C | 0.20894900  | -5.14285600 | 1.45331100  |
| C | 1.81917600  | -4.04786000 | 2.85401700  |
| C | 0.94799300  | -5.11569900 | 2.63679500  |
| H | -0.47741800 | -5.96681100 | 1.27149500  |
| H | 2.40400400  | -4.01369600 | 3.77069600  |
| C | 2.90884200  | -1.87414500 | 2.17336600  |
| H | 2.34987800  | -0.98153200 | 2.47455300  |
| H | 3.47633200  | -1.61652600 | 1.27305400  |
| H | 3.61512900  | -2.12149300 | 2.96827200  |
| C | 0.83306400  | -6.23047200 | 3.64513800  |
| H | 0.95875200  | -5.85521300 | 4.66360800  |
| H | 1.60465900  | -6.98899200 | 3.47664200  |
| H | -0.13798900 | -6.72622800 | 3.57698200  |

|   |             |             |             |
|---|-------------|-------------|-------------|
| C | -0.50840200 | -4.15195400 | -0.75813000 |
| H | 0.11097000  | -3.98523300 | -1.64424500 |
| H | -1.25521200 | -3.34946100 | -0.72314600 |
| H | -1.02710300 | -5.10677500 | -0.86637500 |
| C | 0.12272700  | -0.19710700 | 0.74478000  |
| O | -0.77754100 | -1.10463200 | 1.26908400  |
| C | -0.07487600 | 1.19100600  | 1.03513100  |
| C | -1.13477900 | 1.67171500  | 1.73058900  |
| H | 0.68672100  | 1.89161700  | 0.70392600  |
| H | -1.89580600 | 0.96254600  | 2.04803200  |
| C | -1.36085200 | 3.07382600  | 2.07183100  |
| C | -2.61467400 | 3.46449700  | 2.57551100  |
| C | -0.38365500 | 4.07677400  | 1.92185100  |
| C | -2.89002200 | 4.79013200  | 2.89188500  |
| H | -3.38184200 | 2.70601700  | 2.71152100  |
| C | -0.66071900 | 5.40187000  | 2.23430900  |
| H | 0.61158800  | 3.81462700  | 1.57227800  |
| C | -1.91594800 | 5.77172900  | 2.71874200  |
| H | -3.87032900 | 5.05835200  | 3.27491200  |
| H | 0.11334900  | 6.15309400  | 2.10763500  |
| H | -2.12735500 | 6.80729100  | 2.96454000  |
| C | -5.91600900 | 1.14622100  | 0.11264100  |
| C | -5.89897300 | 1.14378200  | -1.41573600 |
| C | -5.69511500 | -0.24865200 | -2.02278700 |
| C | -4.63096600 | 0.63674200  | 0.76329800  |
| C | -4.25111700 | -0.80384500 | 0.37665800  |
| C | -3.54838100 | -0.86827300 | -0.95966600 |
| H | -6.75383400 | 0.52105800  | 0.45083500  |
| H | -5.11268500 | 1.80957300  | -1.79350400 |
| H | -6.05689600 | -0.25532400 | -3.05339400 |

|   |             |             |             |
|---|-------------|-------------|-------------|
| H | -4.74845400 | 0.67796500  | 1.85177100  |
| H | -5.13993600 | -1.44524600 | 0.38515600  |
| C | -3.66233700 | -0.67017500 | -3.39812500 |
| H | -3.46230100 | 0.36511500  | -3.70919500 |
| C | -1.52619700 | -0.99690300 | -2.19053000 |
| C | -2.37067700 | -1.47225000 | -3.36487500 |
| H | -1.83836100 | -1.35746500 | -4.31231900 |
| H | -2.60380500 | -2.53500400 | -3.23363400 |
| H | -1.18657800 | 0.03566500  | -2.36139000 |
| H | -4.36388300 | -1.10084300 | -4.11899600 |
| H | -0.62420900 | -1.60964700 | -2.08448600 |
| N | -2.26761100 | -1.05186600 | -0.93674300 |
| N | -4.30066700 | -0.68458600 | -2.08241700 |
| H | -6.29764300 | -0.98554500 | -1.47704400 |
| H | -6.85372800 | 1.53891400  | -1.77910700 |
| H | -6.11927600 | 2.16117200  | 0.47058100  |
| H | -3.79101000 | 1.29818300  | 0.51395700  |
| H | -3.54717400 | -1.20264200 | 1.10936900  |
| H | -1.43616700 | -1.21892700 | 0.51264000  |

Re-M02-DBUH

|   |            |             |             |
|---|------------|-------------|-------------|
| C | 5.26000400 | -1.94443200 | -0.70952300 |
| C | 4.17757200 | -1.12929600 | -0.38231800 |
| C | 4.32135300 | -0.03945000 | 0.47184500  |
| C | 5.59193800 | 0.25183500  | 0.96528600  |
| C | 6.68563200 | -0.54344900 | 0.61659000  |
| C | 6.52670000 | -1.64998100 | -0.21560500 |
| C | 4.83190100 | -3.09283400 | -1.58765500 |
| C | 3.29165800 | -3.10100300 | -1.50447500 |
| C | 2.91905200 | -1.64405700 | -1.05344000 |

|   |             |             |             |
|---|-------------|-------------|-------------|
| H | 3.46747200  | 0.56810300  | 0.76377200  |
| H | 5.72799400  | 1.09825700  | 1.63007700  |
| H | 7.66781900  | -0.30614100 | 1.01207500  |
| H | 7.37517600  | -2.27987200 | -0.46386400 |
| H | 5.22920000  | -4.05812500 | -1.26275300 |
| H | 2.82995200  | -3.32814700 | -2.46575200 |
| H | 5.15159200  | -2.93581100 | -2.62313600 |
| H | 2.63251900  | -1.05533000 | -1.92819000 |
| N | 1.78770900  | -1.67200500 | -0.12641000 |
| O | 2.79516300  | -4.10085800 | -0.62554600 |
| C | 0.74364800  | -0.84468000 | 0.05965000  |
| C | 1.72520000  | -2.64194200 | 0.83644300  |
| N | 0.09494300  | -1.33465600 | 1.11736900  |
| N | 0.69733000  | -2.46267800 | 1.60811400  |
| C | 2.72310500  | -3.75130700 | 0.74593800  |
| H | 3.69456500  | -3.43900200 | 1.14915400  |
| H | 2.36889300  | -4.62291500 | 1.29531800  |
| C | -1.09024800 | -0.87413300 | 1.80481300  |
| C | -2.24881500 | -1.63961600 | 1.68063200  |
| C | -0.98275500 | 0.23612500  | 2.64388500  |
| C | -3.35322600 | -1.24463700 | 2.43631600  |
| C | -2.11716800 | 0.59420400  | 3.36806600  |
| C | -3.30710700 | -0.13289600 | 3.27728800  |
| H | -4.27347300 | -1.81846300 | 2.35711100  |
| H | -2.06737800 | 1.45773700  | 4.02636400  |
| C | 0.30230000  | 1.00869900  | 2.74625400  |
| H | 0.51298900  | 1.51968100  | 1.80129200  |
| H | 1.14790300  | 0.34842000  | 2.96603800  |
| H | 0.23860200  | 1.75821800  | 3.53618400  |
| C | -4.52745700 | 0.30547200  | 4.04315100  |

|   |             |             |             |
|---|-------------|-------------|-------------|
| H | -5.23609800 | -0.51577800 | 4.16668400  |
| H | -5.04120200 | 1.11369600  | 3.51092900  |
| H | -4.25820400 | 0.68528400  | 5.03156300  |
| C | -2.30339900 | -2.84819300 | 0.78662700  |
| H | -1.76668500 | -3.69082900 | 1.23278000  |
| H | -1.84906200 | -2.63729200 | -0.18623500 |
| H | -3.33998500 | -3.14886900 | 0.62274900  |
| C | 0.36272900  | 0.34693300  | -0.82342200 |
| O | -0.79660700 | 0.93232100  | -0.37380700 |
| C | 1.50951700  | 1.33505200  | -0.88099200 |
| C | 1.36781900  | 2.61310700  | -0.52279500 |
| H | 2.45694000  | 0.96682000  | -1.26397600 |
| H | 0.38396500  | 2.93546300  | -0.18766100 |
| C | 2.42190100  | 3.64189000  | -0.53910600 |
| C | 2.07128200  | 4.96124400  | -0.22797400 |
| C | 3.76372400  | 3.35751900  | -0.83407800 |
| C | 3.02744000  | 5.97230700  | -0.21737900 |
| H | 1.03575500  | 5.19188200  | 0.00699300  |
| C | 4.71914800  | 4.36566100  | -0.82086400 |
| H | 4.07190600  | 2.34226200  | -1.06675700 |
| C | 4.35514000  | 5.67722800  | -0.51389300 |
| H | 2.73562800  | 6.98905200  | 0.02471700  |
| H | 5.75348400  | 4.12792600  | -1.04795400 |
| H | 5.10437200  | 6.46219000  | -0.50346800 |
| H | -1.59700500 | 0.40946800  | -0.78233200 |
| C | -5.94102400 | 2.55060000  | -0.72480400 |
| C | -6.55641000 | 1.54035800  | -1.69421500 |
| C | -6.41515100 | 0.08444100  | -1.23757900 |
| C | -4.44201700 | 2.37542700  | -0.48027900 |
| C | -4.06070700 | 0.99151700  | 0.07301700  |



|   |             |             |             |
|---|-------------|-------------|-------------|
| C | -3.96011800 | -0.04414200 | -1.02211200 |
| H | -6.46244400 | 2.46653200  | 0.23863500  |
| H | -6.10857800 | 1.64048900  | -2.69112200 |
| H | -7.16296200 | -0.53422600 | -1.73815900 |
| H | -4.11215800 | 3.13338000  | 0.23682300  |
| H | -4.78415000 | 0.67550500  | 0.83276700  |
| C | -5.07454100 | -1.40715300 | -2.71339800 |
| H | -5.14117800 | -0.81883100 | -3.63926600 |
| C | -2.60669100 | -1.28843500 | -2.54101500 |
| C | -3.79536300 | -2.22723700 | -2.69298700 |
| H | -3.71490200 | -2.81487100 | -3.61045200 |
| H | -3.82526400 | -2.92210000 | -1.84731600 |
| H | -2.46672900 | -0.70686300 | -3.46225600 |
| H | -5.95034200 | -2.06033500 | -2.67246600 |
| H | -1.68560100 | -1.86374300 | -2.39192600 |
| N | -2.76708900 | -0.37338200 | -1.41570700 |
| N | -5.11813100 | -0.51947800 | -1.55136200 |
| H | -6.61454900 | 0.00460900  | -0.16248500 |
| H | -7.62329500 | 1.76263200  | -1.80185000 |
| H | -6.12941400 | 3.56423300  | -1.09345700 |
| H | -3.88016000 | 2.55418600  | -1.40587100 |
| H | -3.08554500 | 1.03463900  | 0.56356700  |
| H | 0.23845600  | -0.09391500 | -1.83145700 |

Re-TS2-tBuOH

|   |            |            |             |
|---|------------|------------|-------------|
| C | 3.71497200 | 2.74292100 | 0.27858300  |
| C | 2.77857500 | 1.79600600 | -0.13220500 |
| C | 2.95618900 | 1.06173800 | -1.30159000 |
| C | 4.11900700 | 1.26618700 | -2.04294000 |
| C | 5.07285800 | 2.19479800 | -1.62127800 |

|   |             |             |             |
|---|-------------|-------------|-------------|
| C | 4.87484500  | 2.94359500  | -0.46260200 |
| C | 3.26644600  | 3.44259800  | 1.53649300  |
| C | 1.77898700  | 3.06333900  | 1.69289700  |
| C | 1.61707700  | 1.75393500  | 0.84085700  |
| H | 2.20439600  | 0.35377400  | -1.64385000 |
| H | 4.27883100  | 0.70549200  | -2.95782500 |
| H | 5.97120100  | 2.34576700  | -2.21108200 |
| H | 5.60786800  | 3.68102700  | -0.14989800 |
| H | 3.37316600  | 4.52972000  | 1.48909300  |
| H | 1.51412000  | 2.86762800  | 2.73240400  |
| H | 3.83724700  | 3.09296100  | 2.40321100  |
| H | 1.65542600  | 0.88589000  | 1.50446500  |
| N | 0.32729500  | 1.73898200  | 0.16339300  |
| O | 0.90617600  | 4.11211800  | 1.29426200  |
| C | -0.55591300 | 0.74225100  | -0.06846700 |
| C | -0.20041600 | 2.89311400  | -0.35043300 |
| N | -1.57301600 | 1.33508700  | -0.70376300 |
| N | -1.36411800 | 2.68286200  | -0.87996600 |
| C | 0.55541700  | 4.15197200  | -0.07911400 |
| H | 1.43660200  | 4.22927400  | -0.72872500 |
| H | -0.08492700 | 5.01950600  | -0.23466700 |
| C | -2.79734800 | 0.76632800  | -1.20535600 |
| C | -3.95029200 | 0.92158800  | -0.43914700 |
| C | -2.76605900 | 0.10438600  | -2.43144500 |
| C | -5.13565600 | 0.41322300  | -0.97146600 |
| C | -3.97379800 | -0.38699700 | -2.91973300 |
| C | -5.16700500 | -0.23089200 | -2.20895400 |
| H | -6.05377100 | 0.51414200  | -0.39804700 |
| H | -3.98275400 | -0.91340500 | -3.87103000 |
| C | -1.45922800 | -0.12191500 | -3.14129900 |

|   |             |             |             |
|---|-------------|-------------|-------------|
| H | -0.82614500 | -0.79324300 | -2.54753200 |
| H | -0.91064900 | 0.81475100  | -3.28278400 |
| H | -1.62107300 | -0.57880100 | -4.11862900 |
| C | -6.46413300 | -0.74439100 | -2.77891000 |
| H | -6.31687400 | -1.69500400 | -3.29731500 |
| H | -6.87445300 | -0.03459200 | -3.50443000 |
| H | -7.21132800 | -0.88927500 | -1.99596500 |
| C | -3.88536100 | 1.54735300  | 0.92818500  |
| H | -3.43325000 | 2.54304400  | 0.88690000  |
| H | -3.27834200 | 0.92440000  | 1.60028400  |
| H | -4.88674700 | 1.64240500  | 1.35182400  |
| C | -0.47874800 | -0.64347600 | 0.44021000  |
| O | -1.62604600 | -1.37234000 | 0.10212600  |
| C | 0.79153400  | -1.35193700 | 0.11302900  |
| C | 0.83034900  | -2.63444700 | -0.27086900 |
| H | 1.72132400  | -0.80345300 | 0.24469300  |
| H | -0.11712900 | -3.16128100 | -0.35901600 |
| C | 2.04711000  | -3.40947300 | -0.56432700 |
| C | 1.94365800  | -4.79920400 | -0.70965700 |
| C | 3.31214400  | -2.82055100 | -0.71803000 |
| C | 3.06334600  | -5.57989300 | -0.98137700 |
| H | 0.96952700  | -5.26850800 | -0.60088500 |
| C | 4.43079100  | -3.59891300 | -0.98881100 |
| H | 3.42556900  | -1.74236000 | -0.64061600 |
| C | 4.31356900  | -4.98280200 | -1.11998400 |
| H | 2.95778800  | -6.65523600 | -1.08596300 |
| H | 5.39948100  | -3.12310600 | -1.10642200 |
| H | 5.18874300  | -5.58708200 | -1.33556700 |
| H | -2.10455300 | -1.34008600 | 0.97766700  |
| C | -1.35977200 | -2.96676400 | 3.01975700  |

|   |             |             |            |
|---|-------------|-------------|------------|
| C | -1.59927200 | -1.55673900 | 3.58621800 |
| H | -2.24889800 | -3.30453200 | 2.47519800 |
| H | -0.51912400 | -2.94757600 | 2.31585200 |
| H | -1.13843600 | -3.69838300 | 3.80518700 |
| C | -0.34898100 | -1.11110700 | 4.36317500 |
| C | -2.80202000 | -1.59133300 | 4.54031400 |
| H | -0.49572000 | -0.09481700 | 4.74311200 |
| H | -0.12297700 | -1.77061800 | 5.20876700 |
| H | 0.52006100  | -1.10376800 | 3.69388200 |
| H | -2.65332400 | -2.29305400 | 5.36905000 |
| H | -2.97212800 | -0.59235000 | 4.95496800 |
| H | -3.70024000 | -1.88838400 | 3.98932000 |
| O | -1.86139200 | -0.65322700 | 2.55844600 |
| H | -0.72676600 | -0.50878800 | 1.63770600 |

Re-TS2-DBU

|   |            |             |             |
|---|------------|-------------|-------------|
| C | 1.45695500 | -3.91390000 | -2.17083300 |
| C | 1.11789100 | -3.06536000 | -1.12015400 |
| C | 1.18769400 | -3.49321500 | 0.20494600  |
| C | 1.63755000 | -4.78549000 | 0.46410100  |
| C | 2.00041600 | -5.63294200 | -0.58601700 |
| C | 1.90708900 | -5.20569300 | -1.90829100 |
| C | 1.24636800 | -3.25553000 | -3.50901400 |
| C | 0.60294200 | -1.88045400 | -3.20171100 |
| C | 0.64281200 | -1.72224700 | -1.63126200 |
| H | 0.88742400 | -2.83948000 | 1.02057900  |
| H | 1.70119400 | -5.13793700 | 1.48822000  |
| H | 2.34710700 | -6.63818500 | -0.36877900 |
| H | 2.17165000 | -5.87279400 | -2.72331500 |
| H | 0.58963400 | -3.83822600 | -4.16374200 |

|   |             |             |             |
|---|-------------|-------------|-------------|
| H | 1.18025700  | -1.07230100 | -3.65244800 |
| H | 2.19182100  | -3.12351200 | -4.04337600 |
| H | 1.32674600  | -0.90692500 | -1.38175500 |
| N | -0.66284300 | -1.37022200 | -1.09504800 |
| O | -0.69084700 | -1.73535500 | -3.76185000 |
| C | -1.00230300 | -0.69898500 | 0.06151500  |
| C | -1.82272400 | -1.74137200 | -1.72009700 |
| N | -2.36140000 | -0.71597800 | 0.04270300  |
| N | -2.87257100 | -1.35695000 | -1.07453500 |
| C | -1.70205600 | -2.41956600 | -3.04231000 |
| H | -1.45414400 | -3.48303400 | -2.91496500 |
| H | -2.63427100 | -2.33606100 | -3.60021200 |
| C | -3.27495300 | -0.34063600 | 1.07745700  |
| C | -4.23137800 | 0.63068300  | 0.78434800  |
| C | -3.21558300 | -0.98820400 | 2.31551500  |
| C | -5.19117000 | 0.91476200  | 1.75737700  |
| C | -4.18822000 | -0.66693400 | 3.25745600  |
| C | -5.19183900 | 0.26945700  | 2.99259800  |
| H | -5.94405600 | 1.67139200  | 1.54882900  |
| H | -4.16033400 | -1.15773700 | 4.22811600  |
| C | -2.09773000 | -1.94174600 | 2.63436500  |
| H | -1.17435700 | -1.35914600 | 2.73668800  |
| H | -1.95337300 | -2.68221300 | 1.84043200  |
| H | -2.29360200 | -2.46987000 | 3.56964500  |
| C | -6.23529900 | 0.58099700  | 4.03517600  |
| H | -5.77239700 | 0.94632800  | 4.95676400  |
| H | -6.81086000 | -0.31299400 | 4.29396700  |
| H | -6.93349300 | 1.34257300  | 3.68117800  |
| C | -4.15857500 | 1.40138200  | -0.50688000 |
| H | -4.34164000 | 0.76114600  | -1.37451200 |

|   |             |             |             |
|---|-------------|-------------|-------------|
| H | -3.15157300 | 1.82464400  | -0.61526000 |
| H | -4.88474200 | 2.21642900  | -0.51245400 |
| C | -0.23153800 | 0.21820600  | 0.88982600  |
| O | -0.88950800 | 0.89752000  | 1.80843600  |
| C | 1.17963300  | -0.16184500 | 1.18397500  |
| C | 1.79479700  | 0.32138500  | 2.27657300  |
| H | 1.74354700  | -0.78259200 | 0.49234400  |
| H | 1.20357400  | 0.97375200  | 2.91580300  |
| C | 3.19769700  | 0.09357500  | 2.64331100  |
| C | 3.81692400  | 0.96030200  | 3.55691600  |
| C | 3.96251700  | -0.96314100 | 2.12169900  |
| C | 5.15123300  | 0.79861800  | 3.91672400  |
| H | 3.23580200  | 1.77508000  | 3.98204700  |
| C | 5.29591000  | -1.12511700 | 2.47928100  |
| H | 3.50114100  | -1.67789000 | 1.44464500  |
| C | 5.90055600  | -0.24372600 | 3.37616900  |
| H | 5.60547100  | 1.48782600  | 4.62223500  |
| H | 5.86552100  | -1.95138000 | 2.06419400  |
| H | 6.94062000  | -0.37561100 | 3.65646500  |
| C | 3.11625100  | 4.36809400  | -0.17084400 |
| C | 2.79987000  | 4.75844500  | -1.61601000 |
| C | 1.33822600  | 5.15660300  | -1.84823600 |
| C | 2.33083300  | 3.16821700  | 0.35762600  |
| C | 0.80420800  | 3.35603800  | 0.31137000  |
| C | 0.24675000  | 3.09160900  | -1.06558200 |
| H | 2.90671900  | 5.23361400  | 0.47278700  |
| H | 3.05085000  | 3.93833900  | -2.30100900 |
| H | 1.26150600  | 5.75404300  | -2.75917000 |
| H | 2.62246700  | 2.97445300  | 1.39512500  |
| H | 0.54568100  | 4.37474800  | 0.62433800  |

|   |             |            |             |
|---|-------------|------------|-------------|
| C | -0.06413200 | 3.77856100 | -3.38911800 |
| H | 0.73861800  | 3.36264700 | -4.01388000 |
| C | -0.88374400 | 1.59230200 | -2.55342200 |
| C | -1.25661100 | 2.83371900 | -3.35269400 |
| H | -1.55483800 | 2.57255100 | -4.37067800 |
| H | -2.10165100 | 3.33450000 | -2.86811300 |
| H | -0.13883300 | 0.99788700 | -3.10202400 |
| H | -0.35301400 | 4.74180800 | -3.81920800 |
| H | -1.75894100 | 0.94641600 | -2.40861500 |
| N | -0.36193700 | 1.95688800 | -1.24447200 |
| N | 0.43202900  | 4.02150500 | -2.03341500 |
| H | 0.98435700  | 5.79028000 | -1.02612300 |
| H | 3.43006400  | 5.60967100 | -1.89509900 |
| H | 4.18900100  | 4.16644300 | -0.08112400 |
| H | 2.59304400  | 2.25996700 | -0.20121500 |
| H | 0.30427100  | 2.66013400 | 0.99509200  |
| H | -0.19569200 | 0.97608000 | -0.20684200 |

Re-TS2-DBUH

|   |             |            |             |
|---|-------------|------------|-------------|
| C | -0.49781900 | 4.24460900 | -1.87140300 |
| C | -0.20249300 | 3.27533700 | -0.91514000 |
| C | -0.06702700 | 3.60437600 | 0.43110600  |
| C | -0.27692000 | 4.92722600 | 0.81566300  |
| C | -0.60182100 | 5.89684000 | -0.13513700 |
| C | -0.70653900 | 5.56489000 | -1.48442700 |
| C | -0.51377100 | 3.65653700 | -3.25894500 |
| C | 0.10889600  | 2.25197700 | -3.10764700 |
| C | -0.01298200 | 1.92284000 | -1.57392400 |
| H | 0.21455900  | 2.85847400 | 1.17091700  |
| H | -0.17707300 | 5.20534400 | 1.85933000  |

|   |             |             |             |
|---|-------------|-------------|-------------|
| H | -0.75685600 | 6.92379900  | 0.17902700  |
| H | -0.93128300 | 6.32707500  | -2.22413900 |
| H | 0.05863000  | 4.24341300  | -3.98281900 |
| H | -0.43068900 | 1.50841200  | -3.69527900 |
| H | -1.53677800 | 3.57487200  | -3.64018400 |
| H | -0.85836500 | 1.24650800  | -1.41289900 |
| N | 1.19175700  | 1.25560600  | -1.09147700 |
| O | 1.44100800  | 2.18299000  | -3.59293600 |
| C | 1.37741600  | 0.28958500  | -0.15841300 |
| C | 2.42527300  | 1.62713300  | -1.55935500 |
| N | 2.70943600  | 0.12210000  | -0.11147000 |
| N | 3.36990100  | 0.94785500  | -0.99350000 |
| C | 2.44784500  | 2.60497800  | -2.68773700 |
| H | 2.27588500  | 3.62706100  | -2.32606400 |
| H | 3.40501300  | 2.56297100  | -3.20619600 |
| C | 3.49446400  | -0.71559500 | 0.75615900  |
| C | 4.17745700  | -1.78939100 | 0.18692900  |
| C | 3.56461400  | -0.39347400 | 2.11421500  |
| C | 4.97403900  | -2.56133600 | 1.03424400  |
| C | 4.37172400  | -1.19423000 | 2.91678100  |
| C | 5.08460900  | -2.27758100 | 2.39470200  |
| H | 5.51710300  | -3.40542900 | 0.61711300  |
| H | 4.44526100  | -0.96883300 | 3.97793300  |
| C | 2.76384200  | 0.74481300  | 2.68470600  |
| H | 1.70137100  | 0.47533700  | 2.73020500  |
| H | 2.85597600  | 1.64745900  | 2.07218900  |
| H | 3.09770400  | 0.98071900  | 3.69622100  |
| C | 5.94918300  | -3.11958900 | 3.29675900  |
| H | 6.44381800  | -3.91801200 | 2.74066900  |
| H | 5.35245700  | -3.57510100 | 4.09233600  |



|   |             |             |             |
|---|-------------|-------------|-------------|
| H | 6.71925000  | -2.50902700 | 3.77690800  |
| C | 4.03784100  | -2.11411700 | -1.27681200 |
| H | 4.42674300  | -1.30531200 | -1.90121900 |
| H | 2.98487800  | -2.25629400 | -1.54523500 |
| H | 4.57795100  | -3.03054400 | -1.51831400 |
| C | 0.32994100  | -0.50837900 | 0.48230100  |
| O | 0.86029700  | -1.51571800 | 1.31170800  |
| C | -0.74813800 | 0.25020600  | 1.16021300  |
| C | -1.32993200 | -0.13728400 | 2.30500000  |
| H | -1.12351100 | 1.13188600  | 0.64805800  |
| H | -0.96235400 | -1.03973100 | 2.78904900  |
| C | -2.46278800 | 0.54106100  | 2.95553800  |
| C | -3.15667400 | -0.12726500 | 3.97372900  |
| C | -2.88485600 | 1.83228200  | 2.60323800  |
| C | -4.24722900 | 0.46213600  | 4.60685400  |
| H | -2.83477000 | -1.12363900 | 4.26587100  |
| C | -3.97342100 | 2.42100200  | 3.23453300  |
| H | -2.35022200 | 2.39331100  | 1.84117700  |
| C | -4.66264200 | 1.73849700  | 4.23756200  |
| H | -4.77047700 | -0.07579300 | 5.39098600  |
| H | -4.28149800 | 3.42186400  | 2.94891700  |
| H | -5.51023200 | 2.20296000  | 4.73056300  |
| H | 0.98704300  | -2.31214600 | 0.77830800  |
| C | -4.75771100 | -2.93091300 | 0.07923400  |
| C | -4.82087900 | -3.30636000 | -1.40201800 |
| C | -3.66791100 | -4.20062100 | -1.86765700 |
| C | -3.50737100 | -2.15654700 | 0.49530100  |
| C | -2.19392500 | -2.90172800 | 0.19969100  |
| C | -1.77278600 | -2.76145400 | -1.24156700 |
| H | -4.80874100 | -3.85383100 | 0.67221400  |

|   |             |             |             |
|---|-------------|-------------|-------------|
| H | -4.83924800 | -2.40675200 | -2.02958200 |
| H | -3.94842000 | -4.71151800 | -2.79041500 |
| H | -3.55096900 | -1.95624400 | 1.57074600  |
| H | -2.29347100 | -3.96222900 | 0.45609400  |
| C | -2.05362900 | -3.38521100 | -3.59166300 |
| H | -2.73192700 | -2.69952500 | -4.11512700 |
| C | -0.40652300 | -1.68050700 | -2.88728500 |
| C | -0.60976900 | -2.93032300 | -3.73170400 |
| H | -0.38598900 | -2.73523600 | -4.78236200 |
| H | 0.06285400  | -3.71889000 | -3.38019400 |
| H | -1.00870600 | -0.85726700 | -3.29631700 |
| H | -2.18411500 | -4.37953500 | -4.02657800 |
| H | 0.64028800  | -1.35796100 | -2.89784100 |
| N | -0.79847200 | -1.93266600 | -1.50642700 |
| N | -2.43555200 | -3.46466500 | -2.17693500 |
| H | -3.46321300 | -4.98094800 | -1.12556100 |
| H | -5.75735500 | -3.84222400 | -1.58719200 |
| H | -5.64458200 | -2.34458700 | 0.33903400  |
| H | -3.47509900 | -1.17556800 | 0.00353600  |
| H | -1.39064000 | -2.49294600 | 0.81471900  |
| H | -0.25965700 | -1.15866700 | -0.55186700 |

Si-M02-tBuOH

|   |             |             |             |
|---|-------------|-------------|-------------|
| C | -4.16307900 | -2.02144900 | 0.56813600  |
| C | -3.09109100 | -1.19841500 | 0.22505000  |
| C | -3.24838800 | -0.14395700 | -0.66846500 |
| C | -4.51329100 | 0.08905300  | -1.20635400 |
| C | -5.59284800 | -0.72446700 | -0.85659600 |
| C | -5.42470500 | -1.78647400 | 0.03074900  |
| C | -3.73068900 | -3.09657300 | 1.53377000  |

|   |             |             |             |
|---|-------------|-------------|-------------|
| C | -2.18980400 | -3.06802800 | 1.48377400  |
| C | -1.83827700 | -1.63537200 | 0.95741500  |
| H | -2.40646900 | 0.48528200  | -0.94107800 |
| H | -4.65726600 | 0.90910200  | -1.90232700 |
| H | -6.57098500 | -0.53320900 | -1.28631200 |
| H | -6.26329600 | -2.42514700 | 0.29139700  |
| H | -4.09842700 | -4.09297000 | 1.27394800  |
| H | -1.74132400 | -3.23475200 | 2.46354600  |
| H | -4.07760300 | -2.87028000 | 2.54787800  |
| H | -1.54917100 | -0.95729500 | 1.76644400  |
| N | -0.67700500 | -1.70986300 | 0.07314400  |
| O | -1.66262300 | -4.11412000 | 0.66994700  |
| C | 0.37777100  | -0.89537900 | -0.07135300 |
| C | -0.54187700 | -2.72952100 | -0.82719900 |
| N | 1.09459700  | -1.43562800 | -1.05469500 |
| N | 0.54099700  | -2.59395700 | -1.53623100 |
| C | -1.53640600 | -3.83974800 | -0.71542300 |
| H | -2.49324500 | -3.55497100 | -1.17128800 |
| H | -1.15967500 | -4.74009600 | -1.19981500 |
| C | 2.32298500  | -0.91615500 | -1.58970600 |
| C | 3.50506200  | -1.14791800 | -0.88266600 |
| C | 2.26471700  | -0.19910900 | -2.78783400 |
| C | 4.67357400  | -0.59804500 | -1.41171600 |
| C | 3.46086300  | 0.32118400  | -3.27572400 |
| C | 4.66948800  | 0.13485900  | -2.59927200 |
| H | 5.61041700  | -0.75397800 | -0.88267000 |
| H | 3.44910600  | 0.88772100  | -4.20330600 |
| C | 0.96135600  | -0.02158800 | -3.52117100 |
| H | 0.17933300  | 0.37461100  | -2.86460200 |
| H | 0.60102000  | -0.98011500 | -3.90663100 |

|   |             |             |             |
|---|-------------|-------------|-------------|
| H | 1.08353200  | 0.66454500  | -4.36012800 |
| C | 5.95046700  | 0.68993100  | -3.16556500 |
| H | 6.35559900  | 0.01602600  | -3.92719400 |
| H | 6.70830700  | 0.80882900  | -2.38875800 |
| H | 5.78329700  | 1.65973700  | -3.63997100 |
| C | 3.51204500  | -1.94822600 | 0.39157900  |
| H | 2.91790800  | -2.86083900 | 0.28313200  |
| H | 3.11017900  | -1.37415300 | 1.23844700  |
| H | 4.53450900  | -2.23459100 | 0.64615400  |
| C | 0.66556400  | 0.34627400  | 0.78302100  |
| O | 0.30253200  | 0.10806900  | 2.05600100  |
| C | -0.05353100 | 1.50091000  | 0.09272200  |
| C | -1.06178100 | 2.12989000  | 0.69928800  |
| H | 0.26896700  | 1.76342100  | -0.91622900 |
| H | -1.32482900 | 1.77331400  | 1.69484700  |
| C | -1.88900500 | 3.20261400  | 0.12220200  |
| C | -3.19294400 | 3.38017000  | 0.60228400  |
| C | -1.43476000 | 4.03997400  | -0.90610500 |
| C | -4.02838800 | 4.35159000  | 0.05978300  |
| H | -3.55235100 | 2.73804900  | 1.40212800  |
| C | -2.26731000 | 5.01416500  | -1.44580400 |
| H | -0.41636400 | 3.93794100  | -1.27004100 |
| C | -3.56813900 | 5.17203700  | -0.96762400 |
| H | -5.03726400 | 4.47031500  | 0.44211000  |
| H | -1.89823700 | 5.65964700  | -2.23670000 |
| H | -4.21512300 | 5.93506400  | -1.38828200 |
| H | 1.63837700  | -0.04910800 | 2.75358700  |
| C | 4.07113700  | 0.95260700  | 4.54885100  |
| C | 3.30365500  | 1.00737700  | 3.22592100  |
| H | 3.36806500  | 0.87867000  | 5.38386000  |

|   |            |             |            |
|---|------------|-------------|------------|
| H | 4.71679700 | 0.06909900  | 4.56574500 |
| H | 4.69349300 | 1.84199000  | 4.69118200 |
| C | 4.30015000 | 1.11957500  | 2.06460900 |
| C | 2.35900900 | 2.21287200  | 3.22586600 |
| H | 3.77581900 | 1.15609300  | 1.10263500 |
| H | 4.91806100 | 2.01981800  | 2.15036600 |
| H | 4.95895400 | 0.24465100  | 2.05621500 |
| H | 2.92003300 | 3.14206300  | 3.36786200 |
| H | 1.80366200 | 2.27977100  | 2.28494800 |
| H | 1.63009300 | 2.11849200  | 4.03703700 |
| O | 2.58245700 | -0.20422700 | 3.11450400 |
| H | 1.75785400 | 0.51765000  | 0.64406300 |

Si-M02-DBU

|   |             |             |             |
|---|-------------|-------------|-------------|
| C | -0.98471200 | -3.27700000 | -2.24106900 |
| C | -0.99133500 | -1.90095400 | -1.99240300 |
| C | -0.35290500 | -1.01679000 | -2.85866700 |
| C | 0.30919200  | -1.53526500 | -3.97176500 |
| C | 0.33010700  | -2.90982800 | -4.21253800 |
| C | -0.32331900 | -3.79056200 | -3.35139100 |
| C | -1.74950100 | -4.02723300 | -1.18147600 |
| C | -2.55601400 | -2.90208400 | -0.49577500 |
| C | -1.73687000 | -1.60067600 | -0.70646800 |
| H | -0.37784600 | 0.04879000  | -2.65726400 |
| H | 0.81367800  | -0.86202100 | -4.65778500 |
| H | 0.85003600  | -3.29601000 | -5.08394200 |
| H | -0.32130900 | -4.85870900 | -3.54818700 |
| H | -1.05577300 | -4.50996000 | -0.48288500 |
| H | -3.50823400 | -2.77706000 | -1.01661900 |
| H | -2.39982700 | -4.80757000 | -1.58378000 |

|   |             |             |             |
|---|-------------|-------------|-------------|
| H | -2.36791800 | -0.71088400 | -0.75342000 |
| N | -0.82061500 | -1.46247900 | 0.44357000  |
| O | -2.89731100 | -3.12594200 | 0.85793300  |
| C | 0.35031900  | -0.70040100 | 0.46805700  |
| C | -0.64307300 | -2.48340600 | 1.35520900  |
| N | 1.17775600  | -1.38708800 | 1.35858900  |
| N | 0.52272300  | -2.48965700 | 1.90131100  |
| C | -1.78792200 | -3.39365100 | 1.69240000  |
| H | -1.47232400 | -4.44202800 | 1.63284800  |
| H | -2.11706400 | -3.19799400 | 2.71640200  |
| C | 2.60282700  | -1.37231800 | 1.35164600  |
| C | 3.26867500  | -0.79486400 | 2.43638400  |
| C | 3.28805800  | -1.88773400 | 0.24374800  |
| C | 4.66056500  | -0.72211000 | 2.38908300  |
| C | 4.67827200  | -1.78575100 | 0.23277800  |
| C | 5.37841400  | -1.19952100 | 1.29028300  |
| H | 5.19485000  | -0.27000400 | 3.22142400  |
| H | 5.22909700  | -2.17355000 | -0.62149400 |
| C | 2.53178200  | -2.49384400 | -0.90812000 |
| H | 2.03727200  | -1.71717200 | -1.50382500 |
| H | 1.74589000  | -3.16961700 | -0.55359200 |
| H | 3.20383100  | -3.05323900 | -1.56187100 |
| C | 6.87754800  | -1.05686700 | 1.22778200  |
| H | 7.33726500  | -1.91924800 | 0.73888300  |
| H | 7.30870000  | -0.95315800 | 2.22581000  |
| H | 7.15441100  | -0.16734000 | 0.65172800  |
| C | 2.47879200  | -0.24262400 | 3.59167800  |
| H | 1.86647800  | -1.02226400 | 4.05391400  |
| H | 1.79375500  | 0.53787000  | 3.24415800  |
| H | 3.13990400  | 0.18219700  | 4.34906600  |

|   |             |            |             |
|---|-------------|------------|-------------|
| C | 0.50212400  | 0.52684700 | -0.12908900 |
| O | -0.59670400 | 1.08814900 | -0.74351500 |
| C | 1.74444600  | 1.24005900 | -0.18844600 |
| C | 1.90720900  | 2.45147700 | -0.76768300 |
| H | 2.60324900  | 0.75017700 | 0.25956900  |
| H | 1.03985400  | 2.92932200 | -1.21646800 |
| C | 3.17009400  | 3.18455900 | -0.84803300 |
| C | 3.19156200  | 4.44061300 | -1.47797200 |
| C | 4.38585300  | 2.70093500 | -0.32591700 |
| C | 4.36361500  | 5.18153700 | -1.58492800 |
| H | 2.26528900  | 4.83482100 | -1.88843900 |
| C | 5.55594600  | 3.44177700 | -0.43264200 |
| H | 4.42009000  | 1.73383200 | 0.17012700  |
| C | 5.55669300  | 4.68719800 | -1.06252600 |
| H | 4.34439200  | 6.14880100 | -2.07846600 |
| H | 6.47874400  | 3.04319500 | -0.02069700 |
| H | 6.47394900  | 5.26145300 | -1.14272300 |
| C | -5.83701500 | 2.46252800 | -1.70516200 |
| C | -6.54966900 | 2.05890100 | -0.41438000 |
| C | -5.95961400 | 2.71393600 | 0.83888900  |
| C | -4.35034800 | 2.10812500 | -1.75655400 |
| C | -3.51523000 | 2.72627800 | -0.62143500 |
| C | -3.62130000 | 1.93378200 | 0.66155800  |
| H | -5.94001700 | 3.54923200 | -1.83003100 |
| H | -6.52746300 | 0.96940200 | -0.28401200 |
| H | -6.70012800 | 2.70578600 | 1.64176800  |
| H | -3.94135200 | 2.45276600 | -2.71123100 |
| H | -3.81473800 | 3.76779500 | -0.45728100 |
| C | -4.97272400 | 1.21684600 | 2.56830300  |
| H | -5.49128100 | 0.28283400 | 2.30859800  |

|   |             |             |             |
|---|-------------|-------------|-------------|
| C | -2.69317900 | 0.33927600  | 2.16165300  |
| C | -3.62920200 | 0.91888200  | 3.21337600  |
| H | -3.76168000 | 0.22324300  | 4.04572500  |
| H | -3.20616800 | 1.84724700  | 3.61126100  |
| H | -3.03317100 | -0.66427500 | 1.86569200  |
| H | -5.61617800 | 1.77167100  | 3.25731700  |
| H | -1.68118800 | 0.22096600  | 2.56429400  |
| N | -2.61180300 | 1.18441600  | 0.97423900  |
| N | -4.77901300 | 2.03654300  | 1.37318800  |
| H | -5.73051200 | 3.76723600  | 0.63733400  |
| H | -7.60314500 | 2.34910400  | -0.48997300 |
| H | -6.34511000 | 2.00145700  | -2.55859400 |
| H | -4.21975000 | 1.01818500  | -1.73601700 |
| H | -2.45998900 | 2.72908200  | -0.89863700 |
| H | -1.34874200 | 1.13540000  | -0.06062400 |

Si-M02-DBUH

|   |            |             |             |
|---|------------|-------------|-------------|
| C | 5.18016200 | -1.43157100 | -0.88527500 |
| C | 4.07855400 | -0.84471700 | -0.26488700 |
| C | 4.22271900 | -0.08369900 | 0.89031000  |
| C | 5.50036200 | 0.09498800  | 1.41525300  |
| C | 6.60840000 | -0.48349800 | 0.79267700  |
| C | 6.45613600 | -1.25186400 | -0.35956400 |
| C | 4.76793600 | -2.20377900 | -2.11231900 |
| C | 3.23475600 | -2.32077100 | -2.00844700 |
| C | 2.81413400 | -1.15563800 | -1.03956500 |
| H | 3.36252500 | 0.36225100  | 1.37847500  |
| H | 5.63292200 | 0.68916100  | 2.31346100  |
| H | 7.59726600 | -0.33797400 | 1.21508600  |
| H | 7.31739100 | -1.70954300 | -0.83631500 |



|   |             |             |             |
|---|-------------|-------------|-------------|
| H | 5.21646000  | -3.19875500 | -2.17536700 |
| H | 2.74482600  | -2.20268000 | -2.97501400 |
| H | 5.04249300  | -1.66002600 | -3.02232200 |
| H | 2.44419400  | -0.29641600 | -1.60425900 |
| N | 1.71807200  | -1.60815000 | -0.18011700 |
| O | 2.82320800  | -3.60669900 | -1.55687200 |
| C | 0.59300100  | -1.00210600 | 0.21691900  |
| C | 1.69601000  | -2.87855500 | 0.32848000  |
| N | -0.05734900 | -1.90092100 | 0.95037700  |
| N | 0.61382300  | -3.08911900 | 1.02268400  |
| C | 2.76930000  | -3.79962700 | -0.15300500 |
| H | 3.72693700  | -3.58459100 | 0.33698700  |
| H | 2.49159300  | -4.83650800 | 0.03203700  |
| C | -1.40572600 | -1.76820900 | 1.44348200  |
| C | -2.43471200 | -2.01678800 | 0.53276700  |
| C | -1.61672700 | -1.39751700 | 2.77303500  |
| C | -3.74304200 | -1.85514400 | 0.99080800  |
| C | -2.94044800 | -1.25640100 | 3.18189800  |
| C | -4.01046100 | -1.47521300 | 2.30783000  |
| H | -4.56527100 | -2.03955200 | 0.30276500  |
| H | -3.14381000 | -0.97616300 | 4.21237700  |
| C | -0.46491000 | -1.17063800 | 3.71480200  |
| H | 0.08195900  | -0.25709400 | 3.46078000  |
| H | 0.24391100  | -2.00211900 | 3.67746800  |
| H | -0.82613600 | -1.07015000 | 4.73877600  |
| C | -5.42497100 | -1.30236400 | 2.79728400  |
| H | -6.14816700 | -1.64306400 | 2.05365500  |
| H | -5.63159300 | -0.24980200 | 3.01935600  |
| H | -5.58781500 | -1.86528600 | 3.72017800  |
| C | -2.12466200 | -2.45498600 | -0.87304100 |

|   |             |             |             |
|---|-------------|-------------|-------------|
| H | -1.71936300 | -1.62179000 | -1.45986700 |
| H | -3.02783300 | -2.81907300 | -1.36318900 |
| H | -1.38654800 | -3.26255300 | -0.87929400 |
| C | 0.12757500  | 0.39541300  | -0.12875700 |
| O | -0.06612100 | 0.46703000  | -1.50225200 |
| C | 1.13166100  | 1.39432400  | 0.40018600  |
| C | 1.80420700  | 2.22319000  | -0.40149200 |
| H | 1.27658600  | 1.38583500  | 1.47910400  |
| H | 1.57846900  | 2.17722700  | -1.46566800 |
| C | 2.84302100  | 3.18419900  | 0.00279700  |
| C | 3.46650900  | 3.94973500  | -0.98989800 |
| C | 3.25617600  | 3.34985400  | 1.33309000  |
| C | 4.47541400  | 4.85306500  | -0.66940400 |
| H | 3.15509000  | 3.82985000  | -2.02399500 |
| C | 4.26358200  | 4.25042500  | 1.65407400  |
| H | 2.78836100  | 2.77670700  | 2.12846200  |
| C | 4.87801600  | 5.00524900  | 0.65414500  |
| H | 4.94728400  | 5.43555700  | -1.45399900 |
| H | 4.57186200  | 4.36604600  | 2.68816000  |
| H | 5.66589600  | 5.70685900  | 0.90797600  |
| H | -1.05739100 | 0.70185400  | -1.65766300 |
| C | -5.44349500 | 3.01654900  | 0.75126800  |
| C | -6.38473600 | 2.24462200  | -0.16983600 |
| C | -5.95292800 | 0.78970400  | -0.36313900 |
| C | -3.98837600 | 3.04400600  | 0.28623800  |
| C | -3.30487600 | 1.66536200  | 0.19605700  |
| C | -3.59815100 | 0.94864400  | -1.10289600 |
| H | -5.48302000 | 2.56160600  | 1.75096700  |
| H | -6.44828800 | 2.72790800  | -1.15261600 |
| H | -6.79863100 | 0.18819200  | -0.70405800 |

|   |             |             |             |
|---|-------------|-------------|-------------|
| H | -3.41099900 | 3.65435600  | 0.98723000  |
| H | -3.57057100 | 1.04248800  | 1.06013000  |
| C | -5.27705300 | 0.18697500  | -2.69661300 |
| H | -5.52137800 | 1.07009200  | -3.30243000 |
| C | -2.86138200 | 0.20560200  | -3.25413600 |
| C | -4.14777500 | -0.60417400 | -3.33563000 |
| H | -4.39037700 | -0.83577200 | -4.37547200 |
| H | -4.03378100 | -1.55023400 | -2.79951400 |
| H | -2.88782100 | 1.02200600  | -3.98724400 |
| H | -6.17984100 | -0.42343700 | -2.62137400 |
| H | -1.99751500 | -0.41641900 | -3.51514200 |
| N | -2.61364400 | 0.78393200  | -1.93379300 |
| N | -4.88928100 | 0.59654100  | -1.34770700 |
| H | -5.63608400 | 0.36462600  | 0.59707900  |
| H | -7.39288400 | 2.25386500  | 0.25765600  |
| H | -5.80230300 | 4.04487400  | 0.86238900  |
| H | -3.91312100 | 3.53789700  | -0.69068300 |
| H | -2.22713000 | 1.82317900  | 0.21930100  |
| H | -0.81560200 | 0.51006900  | 0.42553100  |

Si-TS2-tBuOH

|   |             |             |             |
|---|-------------|-------------|-------------|
| C | -4.88413600 | -1.02431800 | -0.04539200 |
| C | -3.51761700 | -0.93904000 | -0.29437400 |
| C | -2.66525000 | -2.01702200 | -0.07212900 |
| C | -3.21167800 | -3.19961600 | 0.41899600  |
| C | -4.58323100 | -3.29434900 | 0.67268400  |
| C | -5.42811300 | -2.21157900 | 0.44066600  |
| C | -5.58882000 | 0.26626900  | -0.37460700 |
| C | -4.46831700 | 1.26678800  | -0.75590500 |
| C | -3.13491400 | 0.42957100  | -0.80320500 |

|   |             |             |             |
|---|-------------|-------------|-------------|
| H | -1.60026800 | -1.93708900 | -0.27902100 |
| H | -2.56917800 | -4.05433300 | 0.60413900  |
| H | -4.99359400 | -4.22310400 | 1.05607500  |
| H | -6.49264000 | -2.29029700 | 0.63998800  |
| H | -6.17349800 | 0.65799400  | 0.46464300  |
| H | -4.64510100 | 1.70162800  | -1.73924200 |
| H | -6.28335400 | 0.13673500  | -1.20964300 |
| H | -2.71684700 | 0.39275200  | -1.80632600 |
| N | -2.10392500 | 1.03338600  | 0.05993400  |
| O | -4.41580300 | 2.38758100  | 0.11277500  |
| C | -0.76317200 | 0.86775200  | 0.08026800  |
| C | -2.43932300 | 1.75524800  | 1.17738200  |
| N | -0.35552500 | 1.51707900  | 1.17940000  |
| N | -1.39442700 | 2.07612600  | 1.87445400  |
| C | -3.87765300 | 2.09349100  | 1.38484900  |
| H | -4.40113000 | 1.25609900  | 1.86759900  |
| H | -3.97129400 | 2.97932900  | 2.01273000  |
| C | 1.00194100  | 1.72374600  | 1.59851100  |
| C | 1.73945500  | 2.73256500  | 0.97680500  |
| C | 1.51565000  | 0.89309400  | 2.60057400  |
| C | 3.07318400  | 2.86968600  | 1.36941300  |
| C | 2.84971900  | 1.07155800  | 2.95370000  |
| C | 3.64234900  | 2.04956200  | 2.34256000  |
| H | 3.67786100  | 3.64253600  | 0.90139700  |
| H | 3.28207900  | 0.43415300  | 3.72113100  |
| C | 0.65295200  | -0.16171500 | 3.24063800  |
| H | 0.26980800  | -0.86697600 | 2.49350000  |
| H | -0.21351800 | 0.28929200  | 3.73311000  |
| H | 1.22121900  | -0.72477800 | 3.98229500  |
| C | 5.07810000  | 2.23157200  | 2.76068800  |

|   |             |             |             |
|---|-------------|-------------|-------------|
| H | 5.13656500  | 2.79838400  | 3.69536300  |
| H | 5.64471700  | 2.77553500  | 2.00253200  |
| H | 5.56200100  | 1.26686100  | 2.93111100  |
| C | 1.12358500  | 3.63341400  | -0.06029900 |
| H | 0.13392900  | 3.97359600  | 0.26038200  |
| H | 1.01660000  | 3.12226600  | -1.02800500 |
| H | 1.75414900  | 4.51239100  | -0.21073600 |
| C | 0.11067700  | 0.19395100  | -0.90658900 |
| O | -0.62286000 | -0.24061400 | -2.02559600 |
| C | 0.97852200  | -0.86097900 | -0.30924900 |
| C | 1.13768900  | -2.07847300 | -0.84336100 |
| H | 1.54412700  | -0.57218800 | 0.57237800  |
| H | 0.55587100  | -2.32679700 | -1.72904700 |
| C | 2.02509500  | -3.13128200 | -0.32178100 |
| C | 1.94566100  | -4.41594100 | -0.87530800 |
| C | 2.94729300  | -2.91325400 | 0.71408700  |
| C | 2.74690500  | -5.45309500 | -0.40704000 |
| H | 1.23991100  | -4.59881300 | -1.68134800 |
| C | 3.74671100  | -3.94830200 | 1.18311600  |
| H | 3.05134500  | -1.92382000 | 1.15175900  |
| C | 3.65067300  | -5.22439100 | 0.62680400  |
| H | 2.66419100  | -6.44006700 | -0.85140200 |
| H | 4.45542700  | -3.75829600 | 1.98325500  |
| H | 4.27942100  | -6.02916300 | 0.99360900  |
| H | -0.24056600 | 0.36699100  | -2.71556700 |
| C | 2.44399900  | 2.49437700  | -4.42537800 |
| C | 2.17757100  | 1.46632100  | -3.31610900 |
| H | 1.67009800  | 2.41478300  | -5.19586500 |
| H | 2.40439700  | 3.50560100  | -4.00696000 |
| H | 3.42242000  | 2.35029900  | -4.89788600 |

|   |            |             |             |
|---|------------|-------------|-------------|
| C | 3.27134500 | 1.59177900  | -2.23985800 |
| C | 2.22890700 | 0.05103200  | -3.91486200 |
| H | 3.08529200 | 0.87685900  | -1.42808200 |
| H | 4.27164200 | 1.39701500  | -2.64353500 |
| H | 3.26254400 | 2.60057200  | -1.81159000 |
| H | 3.19706300 | -0.17092600 | -4.37823900 |
| H | 2.04187400 | -0.69041200 | -3.12975900 |
| H | 1.44919700 | -0.05439700 | -4.67786600 |
| O | 0.92121800 | 1.71738700  | -2.76465100 |
| H | 0.76937100 | 1.05830600  | -1.48137800 |

Si-TS2-DBU

|   |            |             |             |
|---|------------|-------------|-------------|
| C | 5.49491600 | 0.97641000  | -0.67349100 |
| C | 4.15139200 | 0.87141800  | -1.03187200 |
| C | 3.36748900 | 1.99961300  | -1.25918700 |
| C | 3.95942900 | 3.25213700  | -1.10476400 |
| C | 5.30409400 | 3.36675800  | -0.74224000 |
| C | 6.08277000 | 2.23050800  | -0.53016500 |
| C | 6.12718400 | -0.37783600 | -0.48398800 |
| C | 5.06194100 | -1.36239700 | -1.02544200 |
| C | 3.71703400 | -0.57440300 | -1.12607300 |
| H | 2.33551300 | 1.85808400  | -1.58042400 |
| H | 3.37317300 | 4.14973000  | -1.27705900 |
| H | 5.74963100 | 4.35068000  | -0.63059900 |
| H | 7.13049900 | 2.32213400  | -0.25833200 |
| H | 6.35097200 | -0.56106900 | 0.57216000  |
| H | 5.33350300 | -1.65960400 | -2.03995800 |
| H | 7.07048400 | -0.48469800 | -1.02569400 |
| H | 3.14448600 | -0.77059200 | -2.03105600 |
| N | 2.83576600 | -0.95568900 | -0.00636600 |

|   |             |             |             |
|---|-------------|-------------|-------------|
| O | 4.96229300  | -2.58422600 | -0.31249300 |
| C | 1.58728900  | -0.47534500 | 0.26624400  |
| C | 3.23178100  | -1.72081900 | 1.05911300  |
| N | 1.32733600  | -0.94878300 | 1.51412900  |
| N | 2.33955800  | -1.74689300 | 1.99737800  |
| C | 4.54512400  | -2.43700100 | 1.02680200  |
| H | 5.28550500  | -1.90301400 | 1.63487500  |
| H | 4.42533500  | -3.43782500 | 1.44436000  |
| C | 0.08260100  | -0.89262600 | 2.21372400  |
| C | -0.82676600 | -1.93850400 | 2.03754800  |
| C | -0.16659100 | 0.18919300  | 3.06610800  |
| C | -2.04906200 | -1.85084200 | 2.70609300  |
| C | -1.40575600 | 0.24038700  | 3.70065600  |
| C | -2.36257000 | -0.76346800 | 3.52068700  |
| H | -2.77678400 | -2.64899000 | 2.57694500  |
| H | -1.62767300 | 1.07846300  | 4.35705800  |
| C | 0.88577300  | 1.24244300  | 3.29472700  |
| H | 1.19219800  | 1.71813200  | 2.35728400  |
| H | 1.78278200  | 0.79628900  | 3.73490700  |
| H | 0.51575500  | 2.01602700  | 3.96952200  |
| C | -3.71497400 | -0.65734000 | 4.17549100  |
| H | -3.64572600 | -0.16948800 | 5.15057900  |
| H | -4.16890300 | -1.64142900 | 4.31013900  |
| H | -4.39180700 | -0.05956500 | 3.55552500  |
| C | -0.47931200 | -3.14326600 | 1.20489200  |
| H | 0.14371900  | -3.83470300 | 1.78144000  |
| H | 0.07828800  | -2.86621600 | 0.30598000  |
| H | -1.38713900 | -3.66885300 | 0.89988400  |
| C | 0.69880300  | 0.15921000  | -0.71704600 |
| O | 1.11988300  | 0.17730100  | -1.98020400 |

|   |             |             |             |
|---|-------------|-------------|-------------|
| C | -0.09063600 | 1.29460800  | -0.19458300 |
| C | -0.69857100 | 2.18003800  | -1.00762300 |
| H | -0.30561500 | 1.30676600  | 0.86984400  |
| H | -0.48338700 | 2.10950400  | -2.07176600 |
| C | -1.66420000 | 3.19518900  | -0.57895300 |
| C | -2.23912700 | 4.05011900  | -1.53357800 |
| C | -2.08804100 | 3.33886600  | 0.75603500  |
| C | -3.19208900 | 4.99992700  | -1.17952500 |
| H | -1.93078200 | 3.95559900  | -2.57184700 |
| C | -3.03825500 | 4.28827400  | 1.11063700  |
| H | -1.67970800 | 2.68881000  | 1.52637700  |
| C | -3.59975000 | 5.12674100  | 0.14631600  |
| H | -3.61856700 | 5.64387700  | -1.94312300 |
| H | -3.34750000 | 4.37349200  | 2.14846600  |
| H | -4.34316500 | 5.86609100  | 0.42649200  |
| C | -5.38564500 | 0.18180400  | -1.28183900 |
| C | -5.49227100 | -1.09715300 | -2.11385400 |
| C | -4.89019300 | -2.32572200 | -1.42306100 |
| C | -3.95974700 | 0.61320800  | -0.93737500 |
| C | -3.15486900 | -0.44532100 | -0.16242300 |
| C | -2.59174900 | -1.50016100 | -1.08435200 |
| H | -5.94029900 | 0.02924300  | -0.34541000 |
| H | -5.00298500 | -0.96572800 | -3.08751100 |
| H | -5.31443400 | -3.23825300 | -1.84752600 |
| H | -3.99845500 | 1.52373400  | -0.33074900 |
| H | -3.77644400 | -0.90602700 | 0.61430500  |
| C | -2.96225800 | -3.35916800 | -2.61365000 |
| H | -3.13322300 | -2.91962200 | -3.60678300 |
| C | -0.72027500 | -2.33991900 | -2.33599500 |
| C | -1.48320800 | -3.65464600 | -2.41362400 |



|   |             |             |             |
|---|-------------|-------------|-------------|
| H | -1.11434800 | -4.27346500 | -3.23531200 |
| H | -1.35210600 | -4.21710800 | -1.48321200 |
| H | -0.65954200 | -1.86095200 | -3.31947100 |
| H | -3.55137400 | -4.27810100 | -2.55184400 |
| H | 0.31556900  | -2.48820900 | -2.00919900 |
| N | -1.33971100 | -1.41277100 | -1.40175100 |
| N | -3.43911000 | -2.44816100 | -1.57252900 |
| H | -5.15517600 | -2.32403200 | -0.35926300 |
| H | -6.54969500 | -1.29983900 | -2.31469200 |
| H | -5.88821300 | 0.99854900  | -1.81039400 |
| H | -3.40394300 | 0.87734800  | -1.84612800 |
| H | -2.30697300 | 0.02787300  | 0.33747500  |
| H | -0.34795800 | -0.65704800 | -0.75294800 |

Si-TS2-DBUH

|   |            |             |             |
|---|------------|-------------|-------------|
| C | 5.61411400 | 0.43618700  | -0.91100700 |
| C | 4.22525400 | 0.52298600  | -0.94678300 |
| C | 3.57030900 | 1.75042700  | -0.87720300 |
| C | 4.34016100 | 2.90425100  | -0.75885700 |
| C | 5.73531100 | 2.82491100  | -0.71953500 |
| C | 6.38103900 | 1.59391100  | -0.79857900 |
| C | 6.08798700 | -0.98932700 | -1.02061000 |
| C | 4.80273000 | -1.85424400 | -1.03046400 |
| C | 3.59260400 | -0.84409500 | -1.05651200 |
| H | 2.48505400 | 1.80947500  | -0.92073800 |
| H | 3.85416700 | 3.87260200  | -0.69982600 |
| H | 6.32092500 | 3.73407300  | -0.62793700 |
| H | 7.46495100 | 1.53662000  | -0.76968000 |
| H | 6.73859800 | -1.28553700 | -0.19086300 |
| H | 4.75647300 | -2.47502800 | -1.92472300 |

|   |             |             |             |
|---|-------------|-------------|-------------|
| H | 6.65922000  | -1.14830900 | -1.93959200 |
| H | 3.00221600  | -0.95777300 | -1.96250900 |
| N | 2.68059000  | -1.09096900 | 0.07772300  |
| O | 4.75203300  | -2.78400000 | 0.03864100  |
| C | 1.41105900  | -0.67202000 | 0.29084100  |
| C | 3.12968000  | -1.63291000 | 1.25796200  |
| N | 1.15182700  | -1.00192800 | 1.56850600  |
| N | 2.22059800  | -1.60451600 | 2.17951500  |
| C | 4.51478300  | -2.18609900 | 1.29526400  |
| H | 5.23812900  | -1.38810100 | 1.51357200  |
| H | 4.59566200  | -2.95445000 | 2.06378400  |
| C | -0.11863500 | -0.92485000 | 2.23228000  |
| C | -1.01878800 | -1.97724400 | 2.04548100  |
| C | -0.38706300 | 0.17621900  | 3.05179400  |
| C | -2.26855300 | -1.86485600 | 2.65493900  |
| C | -1.65265800 | 0.24569200  | 3.63162800  |
| C | -2.60834300 | -0.75487200 | 3.43041900  |
| H | -2.99126000 | -2.66620600 | 2.52274700  |
| H | -1.89489900 | 1.09656900  | 4.26324800  |
| C | 0.66370100  | 1.22359600  | 3.31104500  |
| H | 1.08249300  | 1.62329700  | 2.38152400  |
| H | 1.49538600  | 0.79496500  | 3.87854000  |
| H | 0.24634100  | 2.05328400  | 3.88324400  |
| C | -3.98342400 | -0.62977000 | 4.03146300  |
| H | -4.44451100 | -1.60936400 | 4.17234100  |
| H | -4.63507700 | -0.04499400 | 3.37345900  |
| H | -3.94742100 | -0.11897800 | 4.99618000  |
| C | -0.62551200 | -3.21108200 | 1.27794400  |
| H | -0.23882500 | -2.97006900 | 0.28344400  |
| H | -1.48370600 | -3.87493400 | 1.16005200  |

|   |             |             |             |
|---|-------------|-------------|-------------|
| H | 0.15980200  | -3.75501000 | 1.81219000  |
| C | 0.46916600  | -0.05278000 | -0.63704500 |
| O | 1.01599900  | 0.01162500  | -1.93822100 |
| C | -0.13086600 | 1.22356000  | -0.18428500 |
| C | -0.44013500 | 2.24202600  | -0.99944200 |
| H | -0.41879000 | 1.27159300  | 0.86057800  |
| H | -0.13421500 | 2.19211400  | -2.04244100 |
| C | -1.15437900 | 3.45963300  | -0.58247500 |
| C | -1.18777700 | 4.56079600  | -1.44772600 |
| C | -1.81838300 | 3.56641700  | 0.65085900  |
| C | -1.84580000 | 5.73490700  | -1.09293400 |
| H | -0.68479700 | 4.49191800  | -2.40872300 |
| C | -2.47495000 | 4.73852900  | 1.00586200  |
| H | -1.83777300 | 2.72109400  | 1.33575000  |
| C | -2.49112300 | 5.82999400  | 0.13702800  |
| H | -1.85525700 | 6.57569900  | -1.77927300 |
| H | -2.98387300 | 4.79971900  | 1.96281300  |
| H | -3.00841900 | 6.74208700  | 0.41576900  |
| H | 0.31231300  | -0.23198600 | -2.55713700 |
| C | -5.31181500 | 0.67028400  | -1.40532400 |
| C | -5.61244400 | -0.59782900 | -2.20599300 |
| C | -5.21694300 | -1.89486800 | -1.49379700 |
| C | -3.83839800 | 0.88383300  | -1.05791400 |
| C | -3.22345700 | -0.27604700 | -0.25642500 |
| C | -2.82809000 | -1.42659500 | -1.14835000 |
| H | -5.88687200 | 0.63220500  | -0.47024300 |
| H | -5.11064400 | -0.56826900 | -3.18125800 |
| H | -5.76244600 | -2.73489100 | -1.92729400 |
| H | -3.74152200 | 1.79809600  | -0.46395700 |
| H | -3.92210300 | -0.62417200 | 0.51233300  |

|   |             |             |             |
|---|-------------|-------------|-------------|
| C | -3.46003100 | -3.34915400 | -2.51608100 |
| H | -3.59488300 | -3.04051000 | -3.56063800 |
| C | -1.10475800 | -2.61534500 | -2.33611800 |
| C | -2.03469400 | -3.81750800 | -2.26994600 |
| H | -1.75842700 | -4.56666300 | -3.01469000 |
| H | -1.96616500 | -4.28033400 | -1.28036100 |
| H | -1.05543200 | -2.23617400 | -3.36528400 |
| H | -4.16791900 | -4.15623400 | -2.31214100 |
| H | -0.08235400 | -2.88291400 | -2.04271500 |
| N | -1.56270900 | -1.55479600 | -1.44609700 |
| N | -3.79347600 | -2.23070500 | -1.62734800 |
| H | -5.49331500 | -1.85294800 | -0.43407100 |
| H | -6.68831000 | -0.63836900 | -2.40422300 |
| H | -5.67794000 | 1.53970600  | -1.96041500 |
| H | -3.24133600 | 1.04234700  | -1.96553800 |
| H | -2.32312500 | 0.05886400  | 0.26221300  |
| H | -0.60744900 | -0.86468300 | -0.82539900 |

Re-TS2<sup>D</sup>

|   |             |            |             |
|---|-------------|------------|-------------|
| C | -3.00982000 | 3.05092400 | 0.27343800  |
| C | -2.19736000 | 1.91973000 | 0.30493600  |
| C | -2.27193500 | 1.00478800 | 1.35184600  |
| C | -3.21003600 | 1.22208000 | 2.35960600  |
| C | -4.04509200 | 2.34073400 | 2.31878000  |
| C | -3.94578800 | 3.26567500 | 1.28097100  |
| C | -2.70094900 | 3.91060200 | -0.92614700 |
| C | -1.38223700 | 3.34434300 | -1.49921100 |
| C | -1.27121800 | 1.89663900 | -0.89454900 |
| H | -1.60683700 | 0.14547600 | 1.39570700  |
| H | -3.28576000 | 0.52076900 | 3.18377300  |

|   |             |             |             |
|---|-------------|-------------|-------------|
| H | -4.76914800 | 2.49842800  | 3.11145800  |
| H | -4.58069900 | 4.14627100  | 1.26510100  |
| H | -2.57785200 | 4.96914300  | -0.67990600 |
| H | -1.40613200 | 3.29085200  | -2.58816800 |
| H | -3.49771900 | 3.83864500  | -1.67393100 |
| H | -1.58260100 | 1.16956600  | -1.64949000 |
| N | 0.10096600  | 1.58839800  | -0.52749200 |
| O | -0.26285800 | 4.17038700  | -1.21066000 |
| C | 0.81920700  | 0.42974800  | -0.60335700 |
| C | 0.92253200  | 2.55753600  | -0.01742800 |
| N | 2.03859400  | 0.77046700  | -0.12652500 |
| N | 2.10717500  | 2.10374700  | 0.22865400  |
| C | 0.36577700  | 3.94077500  | 0.03989500  |
| H | -0.33837400 | 4.04509400  | 0.87615200  |
| H | 1.16657100  | 4.67090800  | 0.15121300  |
| C | 3.16168300  | -0.06857200 | 0.17518400  |
| C | 4.37951200  | 0.21810300  | -0.44505300 |
| C | 3.01095100  | -1.10004900 | 1.10683200  |
| C | 5.48148600  | -0.56304300 | -0.09586700 |
| C | 4.14143500  | -1.85122600 | 1.42081900  |
| C | 5.38328300  | -1.59476800 | 0.83675100  |
| H | 6.43779300  | -0.36326900 | -0.57321900 |
| H | 4.04741900  | -2.66060100 | 2.14103900  |
| C | 1.67491600  | -1.41247600 | 1.72278200  |
| H | 1.04648200  | -1.91778500 | 0.98067000  |
| H | 1.16095300  | -0.50432900 | 2.05521800  |
| H | 1.79591500  | -2.07215500 | 2.58408600  |
| C | 6.59286300  | -2.40696700 | 1.22270700  |
| H | 6.33689500  | -3.46254300 | 1.34363100  |
| H | 7.00529900  | -2.05860900 | 2.17526300  |

|   |             |             |             |
|---|-------------|-------------|-------------|
| H | 7.37982300  | -2.32613700 | 0.46974600  |
| C | 4.49680900  | 1.31000200  | -1.47559000 |
| H | 4.41681600  | 2.29904400  | -1.01698200 |
| H | 3.69544800  | 1.23178500  | -2.21691400 |
| H | 5.45511700  | 1.24218900  | -1.99322300 |
| C | 0.43232900  | -0.82544200 | -1.19363700 |
| O | 1.47639300  | -1.78412100 | -1.36377300 |
| C | -0.91018000 | -1.34900900 | -0.90401800 |
| C | -1.16237200 | -2.66955000 | -0.91293000 |
| H | -1.71015000 | -0.64872800 | -0.67985700 |
| H | -0.33563400 | -3.32520600 | -1.17349000 |
| C | -2.45566100 | -3.30194500 | -0.62344600 |
| C | -2.61917300 | -4.66758800 | -0.89853600 |
| C | -3.54466700 | -2.60896400 | -0.06837300 |
| C | -3.82460300 | -5.31594500 | -0.64854500 |
| H | -1.78392600 | -5.22137100 | -1.31936400 |
| C | -4.74992300 | -3.25489700 | 0.17888900  |
| H | -3.44539500 | -1.55746800 | 0.18956200  |
| C | -4.89894300 | -4.61151000 | -0.11128900 |
| H | -3.92429800 | -6.37337900 | -0.87366700 |
| H | -5.57708500 | -2.69917300 | 0.61029900  |
| H | -5.84057900 | -5.11326700 | 0.08651800  |
| H | 0.90527900  | -0.95090300 | -2.26099600 |

Si-TS2<sup>D</sup>

|   |             |             |             |
|---|-------------|-------------|-------------|
| C | -4.31683400 | -1.54459200 | 0.64230300  |
| C | -3.10347400 | -1.43095100 | -0.03151000 |
| C | -2.03854500 | -2.29008700 | 0.22961200  |
| C | -2.20711400 | -3.26728300 | 1.20818200  |
| C | -3.41808300 | -3.38208900 | 1.89712700  |

|   |             |             |             |
|---|-------------|-------------|-------------|
| C | -4.48224700 | -2.52876700 | 1.61459700  |
| C | -5.32073200 | -0.52938900 | 0.16204300  |
| C | -4.58941800 | 0.26845000  | -0.94883600 |
| C | -3.12169700 | -0.28856500 | -1.01863000 |
| H | -1.12291400 | -2.21137100 | -0.35468400 |
| H | -1.39490400 | -3.95163800 | 1.43187000  |
| H | -3.53363700 | -4.15025500 | 2.65537600  |
| H | -5.42579700 | -2.63009900 | 2.14288500  |
| H | -5.65976400 | 0.13390200  | 0.96475200  |
| H | -5.06088900 | 0.08722400  | -1.91499700 |
| H | -6.21720800 | -1.00856600 | -0.24097600 |
| H | -2.83259600 | -0.61129900 | -2.01718900 |
| N | -2.15542700 | 0.75591600  | -0.63183000 |
| O | -4.66819600 | 1.67561700  | -0.78568500 |
| C | -0.79452900 | 0.70614800  | -0.67133900 |
| C | -2.49993200 | 1.85744800  | 0.10907800  |
| N | -0.39886900 | 1.78882700  | 0.03950500  |
| N | -1.46316100 | 2.51207000  | 0.52331700  |
| C | -3.94615300 | 2.15905300  | 0.32541700  |
| H | -4.28735500 | 1.70596000  | 1.26600700  |
| H | -4.09977000 | 3.23682700  | 0.38636600  |
| C | 0.93923400  | 2.23422600  | 0.28083000  |
| C | 1.60782400  | 2.92529100  | -0.72934800 |
| C | 1.53002800  | 1.91788800  | 1.50952500  |
| C | 2.93132100  | 3.29654000  | -0.48609400 |
| C | 2.85014500  | 2.31111300  | 1.70722400  |
| C | 3.56584200  | 2.99606500  | 0.71846200  |
| H | 3.47725100  | 3.82960300  | -1.26014300 |
| H | 3.33780700  | 2.06998900  | 2.64888600  |
| C | 0.76370900  | 1.13481800  | 2.54125700  |

|   |             |             |             |
|---|-------------|-------------|-------------|
| H | 0.43410100  | 0.17304000  | 2.13066900  |
| H | -0.13299500 | 1.67515600  | 2.85809300  |
| H | 1.38289100  | 0.93986300  | 3.41785400  |
| C | 4.99569700  | 3.40115500  | 0.96558000  |
| H | 5.05468600  | 4.15066900  | 1.76051200  |
| H | 5.44908300  | 3.82248200  | 0.06653600  |
| H | 5.59339600  | 2.54187900  | 1.28231400  |
| C | 0.92398600  | 3.22935000  | -2.03442900 |
| H | -0.03689100 | 3.72501700  | -1.86760000 |
| H | 0.72537600  | 2.30279900  | -2.58394100 |
| H | 1.54612300  | 3.87375200  | -2.65689400 |
| C | 0.00928500  | -0.22411200 | -1.42348000 |
| O | -0.71044800 | -1.15340400 | -2.25108500 |
| C | 1.28735400  | -0.67176700 | -0.86390300 |
| C | 1.83961400  | -1.85332900 | -1.18943100 |
| H | 1.79395000  | -0.00560600 | -0.17242600 |
| H | 1.30064000  | -2.48637100 | -1.89020000 |
| C | 3.11975300  | -2.35918500 | -0.67665500 |
| C | 3.56469400  | -3.62707200 | -1.07922300 |
| C | 3.93553100  | -1.62898700 | 0.20523600  |
| C | 4.77127800  | -4.14929700 | -0.62219900 |
| H | 2.94931200  | -4.20748700 | -1.76177000 |
| C | 5.13943400  | -2.14940100 | 0.66203000  |
| H | 3.62987800  | -0.64010700 | 0.53726900  |
| C | 5.56636700  | -3.41329900 | 0.25221500  |
| H | 5.09072900  | -5.13329300 | -0.95151600 |
| H | 5.75179200  | -1.56404800 | 1.34144300  |
| H | 6.50800500  | -3.81617100 | 0.61079600  |
| H | -0.08297100 | -0.02348700 | -2.58591700 |



Re-M2

|   |             |             |             |
|---|-------------|-------------|-------------|
| C | 0.13946000  | 3.15566000  | 1.26559700  |
| C | -0.71977700 | 2.14308100  | 0.82304300  |
| C | -1.35046000 | 1.30294800  | 1.73723600  |
| C | -1.07568400 | 1.46084100  | 3.09590400  |
| C | -0.19386200 | 2.44939600  | 3.53296400  |
| C | 0.41047900  | 3.31261300  | 2.61999900  |
| C | 0.65738000  | 3.97438700  | 0.11325100  |
| C | -0.32828200 | 3.60113900  | -1.01503700 |
| C | -0.80517100 | 2.15888900  | -0.69194700 |
| H | -2.04956300 | 0.53998300  | 1.41206000  |
| H | -1.55760700 | 0.81048400  | 3.81863500  |
| H | 0.00895100  | 2.55916700  | 4.59363100  |
| H | 1.07532400  | 4.10049700  | 2.96131800  |
| H | 1.68632300  | 3.68516200  | -0.13338300 |
| H | -1.20427500 | 4.25046300  | -0.94909400 |
| H | 0.66105000  | 5.04844300  | 0.31217100  |
| H | -1.80666500 | 1.97961700  | -1.08805100 |
| N | 0.15001900  | 1.21705400  | -1.32861900 |
| O | 0.14970200  | 3.74034800  | -2.33259700 |
| C | 0.42837500  | -0.09900400 | -0.93977000 |
| C | 1.32086800  | 1.69169200  | -1.90260000 |
| N | 1.78125200  | -0.27552800 | -1.23053500 |
| N | 2.30204700  | 0.86389200  | -1.84037200 |
| C | 1.34496400  | 3.02977300  | -2.58188300 |
| H | 2.23134500  | 3.59159800  | -2.26418600 |
| H | 1.40373800  | 2.88785700  | -3.66386000 |
| C | 2.69227600  | -1.07749000 | -0.46710000 |
| C | 3.23630900  | -2.22183200 | -1.05917700 |
| C | 3.02654700  | -0.68272600 | 0.83405300  |

|   |             |             |             |
|---|-------------|-------------|-------------|
| C | 4.14385800  | -2.97486000 | -0.31820000 |
| C | 3.93397900  | -1.47211400 | 1.54366900  |
| C | 4.50230900  | -2.61636300 | 0.98405400  |
| H | 4.57926400  | -3.86569600 | -0.76493200 |
| H | 4.20859400  | -1.17870200 | 2.55424500  |
| C | 2.41675700  | 0.55180400  | 1.44643500  |
| H | 1.35497600  | 0.40554700  | 1.68134900  |
| H | 2.47818500  | 1.40168600  | 0.75857100  |
| H | 2.93150900  | 0.82016100  | 2.37095100  |
| C | 5.46342000  | -3.46707900 | 1.77408800  |
| H | 4.93697400  | -4.29275000 | 2.26397200  |
| H | 5.96198400  | -2.88442100 | 2.55179900  |
| H | 6.22657200  | -3.90382200 | 1.12549300  |
| C | 2.81196200  | -2.62408800 | -2.44416000 |
| H | 2.98771100  | -1.81652500 | -3.15997600 |
| H | 1.73865200  | -2.83764600 | -2.45160100 |
| H | 3.35244600  | -3.51293000 | -2.77444000 |
| C | -0.42484000 | -1.07110900 | -0.49883100 |
| O | 0.10386500  | -2.32001200 | -0.19122400 |
| C | -1.85278200 | -0.95221700 | -0.49030100 |
| C | -2.70391700 | -1.90725800 | -0.05502400 |
| H | -2.25542100 | -0.03440800 | -0.91081800 |
| H | -2.28094500 | -2.83548800 | 0.32109600  |
| C | -4.16532000 | -1.81450500 | -0.06174800 |
| C | -4.92431900 | -2.95838700 | 0.23533700  |
| C | -4.86185500 | -0.62436000 | -0.33775700 |
| C | -6.31475300 | -2.92283100 | 0.24318000  |
| H | -4.40671000 | -3.88783000 | 0.45813000  |
| C | -6.25041800 | -0.58920700 | -0.33352100 |
| H | -4.31333600 | 0.29011600  | -0.54554000 |

|   |             |             |             |
|---|-------------|-------------|-------------|
| C | -6.98801200 | -1.73789900 | -0.04464500 |
| H | -6.87379100 | -3.82428700 | 0.47493100  |
| H | -6.76245000 | 0.34368300  | -0.54930800 |
| H | -8.07254800 | -1.70607400 | -0.03851200 |
| H | 0.68099100  | -2.24788500 | 0.57994800  |

Si-M2

|   |            |             |             |
|---|------------|-------------|-------------|
| C | 3.79807800 | 1.05598800  | 1.30131400  |
| C | 2.89344600 | 1.61426700  | 0.39181700  |
| C | 1.94212300 | 2.53825000  | 0.81813200  |
| C | 1.88740300 | 2.86791300  | 2.17254000  |
| C | 2.77186900 | 2.28914300  | 3.08350100  |
| C | 3.74117700 | 1.38561900  | 2.65107500  |
| C | 4.76076300 | 0.12513400  | 0.61359200  |
| C | 4.58408700 | 0.50547100  | -0.87344900 |
| C | 3.13928000 | 1.06296700  | -1.00105800 |
| H | 1.25913600 | 2.98984600  | 0.10837700  |
| H | 1.14921500 | 3.58325000  | 2.52096100  |
| H | 2.71526300 | 2.55663200  | 4.13410000  |
| H | 4.44687700 | 0.95362500  | 3.35450700  |
| H | 4.48162100 | -0.91828300 | 0.80132100  |
| H | 5.26979300 | 1.32024600  | -1.11712800 |
| H | 5.79457100 | 0.24827000  | 0.94479200  |
| H | 3.03662100 | 1.80584600  | -1.79113100 |
| N | 2.25033400 | -0.08483800 | -1.31237400 |
| O | 4.86576100 | -0.51765600 | -1.80431700 |
| C | 0.88210200 | -0.14063200 | -1.04882500 |
| C | 2.71530200 | -1.38384200 | -1.20718200 |
| N | 0.65074200 | -1.46933100 | -0.72402400 |
| N | 1.81063400 | -2.22546900 | -0.84727700 |

|   |             |             |             |
|---|-------------|-------------|-------------|
| C | 4.13155400  | -1.70468700 | -1.58593600 |
| H | 4.59144200  | -2.34082800 | -0.82040500 |
| H | 4.14002100  | -2.25368800 | -2.53096600 |
| C | -0.42811000 | -1.97501400 | 0.05849100  |
| C | -1.36367900 | -2.81667600 | -0.55150100 |
| C | -0.53951900 | -1.57771800 | 1.39705100  |
| C | -2.45078800 | -3.24517500 | 0.20852200  |
| C | -1.64878300 | -2.02153300 | 2.11604000  |
| C | -2.61660300 | -2.84491100 | 1.53672400  |
| H | -3.19156400 | -3.89665000 | -0.24911800 |
| H | -1.75847700 | -1.71830800 | 3.15478500  |
| C | 0.48729200  | -0.67015500 | 2.01937200  |
| H | 0.34539800  | 0.36631900  | 1.69047700  |
| H | 1.50304900  | -0.95772700 | 1.72771800  |
| H | 0.41636500  | -0.69628400 | 3.10840500  |
| C | -3.83201900 | -3.26813500 | 2.32095100  |
| H | -4.62734800 | -2.52080300 | 2.22748300  |
| H | -3.60148500 | -3.37147200 | 3.38379700  |
| H | -4.22738600 | -4.21889400 | 1.95663000  |
| C | -1.19800800 | -3.20557100 | -1.99547200 |
| H | -0.24101000 | -3.70949700 | -2.15666400 |
| H | -1.20294700 | -2.31576200 | -2.63343500 |
| H | -2.00402100 | -3.86808200 | -2.31518400 |
| C | -0.00192600 | 0.89607100  | -1.20669800 |
| O | 0.52580100  | 2.08365900  | -1.71539600 |
| C | -1.39825200 | 0.85003800  | -0.89155000 |
| C | -2.25861700 | 1.88420900  | -1.03027300 |
| H | -1.77811700 | -0.10348900 | -0.53912400 |
| H | -1.88185800 | 2.83695400  | -1.39584800 |
| C | -3.69000300 | 1.82875900  | -0.72744400 |

|   |             |             |             |
|---|-------------|-------------|-------------|
| C | -4.50293000 | 2.92550600  | -1.05864800 |
| C | -4.30755000 | 0.72366800  | -0.11165400 |
| C | -5.87013300 | 2.91947300  | -0.80276000 |
| H | -4.04648400 | 3.79260000  | -1.52939700 |
| C | -5.67333100 | 0.71727300  | 0.14121800  |
| H | -3.71456600 | -0.13855100 | 0.18360900  |
| C | -6.46655300 | 1.81281300  | -0.20307500 |
| H | -6.47098400 | 3.78237900  | -1.07375100 |
| H | -6.12380700 | -0.14898600 | 0.61705200  |
| H | -7.53265600 | 1.80370800  | -0.00131000 |
| H | 0.21284500  | 2.17598300  | -2.62602200 |

TS3RR

|   |            |             |             |
|---|------------|-------------|-------------|
| C | 1.74090100 | -4.48060400 | 1.85858400  |
| C | 1.63695700 | -3.14511600 | 1.46067900  |
| C | 1.43762700 | -2.13737400 | 2.40451000  |
| C | 1.32458600 | -2.49255800 | 3.74758900  |
| C | 1.42071000 | -3.82722100 | 4.14354700  |
| C | 1.63647200 | -4.82957000 | 3.20105600  |
| C | 1.96263300 | -5.39861700 | 0.68789400  |
| C | 2.32735000 | -4.42853200 | -0.45544800 |
| C | 1.77979900 | -3.02603400 | -0.04684700 |
| H | 1.39447100 | -1.09713000 | 2.10320000  |
| H | 1.17127200 | -1.71943400 | 4.49328600  |
| H | 1.33671300 | -4.08456500 | 5.19467200  |
| H | 1.72538000 | -5.86738900 | 3.50804500  |
| H | 1.05252500 | -5.96757700 | 0.47175100  |
| H | 3.41336800 | -4.33494800 | -0.51205500 |
| H | 2.75873500 | -6.12674400 | 0.85903600  |
| H | 2.43203200 | -2.21483700 | -0.36222200 |

|   |             |             |             |
|---|-------------|-------------|-------------|
| N | 0.46753700  | -2.82257300 | -0.71352600 |
| O | 1.92588200  | -4.83110900 | -1.74964000 |
| C | -0.43204700 | -1.81008000 | -0.52152900 |
| C | -0.19392100 | -3.82103000 | -1.38351400 |
| N | -1.59597900 | -2.28936600 | -1.01817200 |
| N | -1.44189000 | -3.53324000 | -1.57518100 |
| C | 0.53767500  | -5.03111600 | -1.88097800 |
| H | 0.19143000  | -5.93120300 | -1.36094400 |
| H | 0.33056500  | -5.15714000 | -2.94530500 |
| C | -2.87666700 | -1.65271900 | -1.07328000 |
| C | -3.68368200 | -1.67542800 | 0.06942300  |
| C | -3.26761100 | -1.05717500 | -2.27309600 |
| C | -4.90353200 | -1.00470500 | 0.00252500  |
| C | -4.50702200 | -0.42077000 | -2.29713700 |
| C | -5.31993600 | -0.35804300 | -1.16485000 |
| H | -5.54273800 | -0.98708600 | 0.88191600  |
| H | -4.83464500 | 0.05793600  | -3.21658900 |
| C | -2.36902300 | -1.10547600 | -3.47849000 |
| H | -2.13316300 | -2.13866100 | -3.74833300 |
| H | -1.42109400 | -0.59571700 | -3.27386900 |
| H | -2.84317500 | -0.62226100 | -4.33398600 |
| C | -6.60375000 | 0.42740200  | -1.19417400 |
| H | -7.07117500 | 0.38601400  | -2.18073400 |
| H | -6.39914900 | 1.47994400  | -0.96900900 |
| H | -7.31612500 | 0.05811600  | -0.45349000 |
| C | -3.22577500 | -2.37472900 | 1.32194400  |
| H | -2.35693200 | -1.87209900 | 1.76442000  |
| H | -2.93001200 | -3.40586100 | 1.10710800  |
| H | -4.02284500 | -2.38884700 | 2.06649300  |
| C | -0.11849100 | -0.52937200 | 0.02615400  |

|   |             |             |             |
|---|-------------|-------------|-------------|
| O | 1.24332200  | -0.27805600 | 0.07690500  |
| C | -1.03436800 | 0.30473500  | 0.62484700  |
| C | -0.71243900 | 1.47767300  | 1.33676700  |
| H | -2.07997900 | 0.05535800  | 0.49416300  |
| H | 0.31780900  | 1.58780600  | 1.67176100  |
| C | -1.70643800 | 2.13000000  | 2.20003600  |
| C | -1.26658200 | 3.14429800  | 3.06911600  |
| C | -3.08438400 | 1.86079200  | 2.15050900  |
| C | -2.16263400 | 3.85205100  | 3.86209800  |
| H | -0.20342400 | 3.37589600  | 3.09458000  |
| C | -3.97891700 | 2.56899900  | 2.94619000  |
| H | -3.47421500 | 1.10016100  | 1.47875100  |
| C | -3.52690700 | 3.56817800  | 3.80695600  |
| H | -1.79524100 | 4.62981700  | 4.52492000  |
| H | -5.03920600 | 2.34030100  | 2.88940000  |
| H | -4.22812700 | 4.11972600  | 4.42472800  |
| H | 1.37242900  | 0.64465700  | -0.19861500 |
| C | 5.67330600  | 2.59122200  | -0.19661100 |
| C | 5.31773900  | 2.12729200  | -1.49223100 |
| C | 6.33818900  | 1.73022800  | -2.37592000 |
| C | 7.65381000  | 1.80409200  | -1.95734100 |
| C | 7.98355400  | 2.26855900  | -0.66550500 |
| C | 7.00579600  | 2.66633100  | 0.22900000  |
| C | 3.43849700  | 2.67203200  | -0.37046100 |
| C | 3.89040300  | 2.18741100  | -1.57746100 |
| H | 6.09191100  | 1.37317800  | -3.37156900 |
| H | 8.45059200  | 1.50170300  | -2.62928400 |
| H | 9.02648900  | 2.31382100  | -0.36839000 |
| H | 7.25721700  | 3.02353200  | 1.22235200  |
| H | 3.28147500  | 1.91056200  | -2.42605200 |

|   |             |            |             |
|---|-------------|------------|-------------|
| N | 4.51211900  | 2.90991000 | 0.45250600  |
| H | 4.38727800  | 3.25673600 | 1.39279400  |
| C | 2.08443400  | 2.94172700 | 0.18090700  |
| O | 2.01537100  | 3.31428900 | 1.37594700  |
| C | 0.96327600  | 2.71341200 | -0.65749400 |
| C | -0.32017500 | 2.95110200 | -0.13083100 |
| H | 1.11190600  | 2.37970200 | -1.67857600 |
| H | -0.34539700 | 3.65002900 | 0.70364500  |
| C | -1.53752900 | 2.94582400 | -0.96375000 |
| C | -2.67462900 | 3.64261300 | -0.53107500 |
| C | -1.59695900 | 2.25871500 | -2.18469000 |
| C | -3.83817000 | 3.65382200 | -1.29608100 |
| H | -2.63751100 | 4.17828800 | 0.41371700  |
| C | -2.75076600 | 2.29049400 | -2.95832100 |
| H | -0.73152100 | 1.70168500 | -2.53162200 |
| C | -3.87837600 | 2.98181600 | -2.51502200 |
| H | -4.70949000 | 4.19778300 | -0.94420500 |
| H | -2.77445000 | 1.77061400 | -3.91147000 |
| H | -4.78099000 | 2.99671200 | -3.11869500 |

TS3RR-180

|   |            |             |             |
|---|------------|-------------|-------------|
| C | 6.63388600 | -0.42916600 | 0.25253000  |
| C | 5.32761800 | -0.11395700 | 0.61678400  |
| C | 4.97533700 | 0.11039400  | 1.94440300  |
| C | 5.96670600 | 0.01037500  | 2.91724600  |
| C | 7.28045200 | -0.30514500 | 2.55933500  |
| C | 7.62406100 | -0.52453900 | 1.22743200  |
| C | 6.75832400 | -0.61787700 | -1.23753500 |
| C | 5.30747800 | -0.62119400 | -1.77521000 |
| C | 4.42271500 | -0.07214900 | -0.59362500 |



|   |             |             |             |
|---|-------------|-------------|-------------|
| H | 3.95272200  | 0.36253900  | 2.21138100  |
| H | 5.71875700  | 0.17890800  | 3.95993700  |
| H | 8.04107100  | -0.38382700 | 3.32949000  |
| H | 8.64549100  | -0.77299400 | 0.95534300  |
| H | 7.26052800  | -1.55012600 | -1.51451800 |
| H | 5.19902000  | 0.03064600  | -2.64305800 |
| H | 7.32756500  | 0.20009800  | -1.68974900 |
| H | 4.07148800  | 0.93359100  | -0.81486400 |
| N | 3.23640900  | -0.91892900 | -0.39386700 |
| O | 4.90826700  | -1.89886200 | -2.24588900 |
| C | 1.99068000  | -0.65145600 | 0.08224900  |
| C | 3.31068500  | -2.27122600 | -0.60184300 |
| N | 1.38352400  | -1.85964900 | 0.13417300  |
| N | 2.19806300  | -2.86682900 | -0.31096300 |
| C | 4.55839300  | -2.80776900 | -1.21992500 |
| H | 5.35571000  | -2.91112600 | -0.47119600 |
| H | 4.36620100  | -3.77968300 | -1.67344100 |
| C | 0.03686300  | -2.16652300 | 0.52628900  |
| C | -0.28039900 | -2.20507400 | 1.88479800  |
| C | -0.90909400 | -2.35738500 | -0.48736200 |
| C | -1.61928200 | -2.41247000 | 2.22162200  |
| C | -2.22820700 | -2.57481100 | -0.09988400 |
| C | -2.60357900 | -2.58776500 | 1.24708300  |
| H | -1.89848300 | -2.42367600 | 3.27207400  |
| H | -2.99099800 | -2.71194600 | -0.86133300 |
| C | -0.50764100 | -2.28841100 | -1.93575100 |
| H | 0.22223300  | -3.06516600 | -2.18153700 |
| H | -0.04203200 | -1.32286700 | -2.16466700 |
| H | -1.37746800 | -2.41214900 | -2.58269200 |
| C | -4.05194400 | -2.77699600 | 1.61515600  |

|   |             |             |             |
|---|-------------|-------------|-------------|
| H | -4.69138700 | -2.12292700 | 1.01159900  |
| H | -4.22383000 | -2.56346100 | 2.67218500  |
| H | -4.37057200 | -3.80587900 | 1.41835400  |
| C | 0.77182200  | -1.96954400 | 2.93447800  |
| H | 1.04650600  | -0.90906600 | 2.97231600  |
| H | 1.67992700  | -2.54066800 | 2.72199500  |
| H | 0.40184800  | -2.25767000 | 3.91935300  |
| C | 1.48346800  | 0.63885800  | 0.46507300  |
| O | 2.46377700  | 1.59789900  | 0.59287000  |
| C | 0.16376300  | 0.88309600  | 0.70308000  |
| C | -0.43128300 | 2.15212300  | 0.95447700  |
| H | -0.51754000 | 0.05631400  | 0.54908000  |
| H | 0.25606000  | 2.95338600  | 1.22772100  |
| C | -1.71418400 | 2.18720500  | 1.68535500  |
| C | -2.05978200 | 3.33486900  | 2.41511900  |
| C | -2.64011800 | 1.13436100  | 1.63348200  |
| C | -3.28432300 | 3.43450200  | 3.06168700  |
| H | -1.35241900 | 4.15955100  | 2.46605200  |
| C | -3.86852300 | 1.23487300  | 2.28185100  |
| H | -2.42462500 | 0.23210300  | 1.06900300  |
| C | -4.20020100 | 2.38325100  | 2.99537100  |
| H | -3.52795700 | 4.33356900  | 3.61966400  |
| H | -4.57129800 | 0.40755600  | 2.22037100  |
| H | -5.15744800 | 2.45868100  | 3.50168800  |
| H | 2.19841100  | 2.38982100  | 0.09767000  |
| C | -6.00546600 | -0.33160800 | -0.73841100 |
| C | -5.21435100 | -1.14852400 | -1.59453800 |
| C | -5.63718800 | -2.46340700 | -1.85822800 |
| C | -6.79658800 | -2.93064300 | -1.26211100 |
| C | -7.55958600 | -2.10673700 | -0.40926000 |

|   |             |             |             |
|---|-------------|-------------|-------------|
| C | -7.18008400 | -0.80106700 | -0.13988600 |
| C | -4.19287000 | 0.84722600  | -1.34118500 |
| C | -4.06905800 | -0.37259300 | -1.96472600 |
| H | -5.05380800 | -3.10459800 | -2.51396600 |
| H | -7.12743900 | -3.94687700 | -1.45169800 |
| H | -8.46342300 | -2.50239500 | 0.04289000  |
| H | -7.76725200 | -0.16542800 | 0.51535000  |
| H | -3.25338100 | -0.68022400 | -2.60384700 |
| N | -5.37035700 | 0.87695300  | -0.63681800 |
| H | -5.60335800 | 1.67275000  | -0.05846300 |
| C | -3.29219900 | 2.02868900  | -1.16901600 |
| O | -3.81966400 | 3.08285000  | -0.74408100 |
| C | -1.92313200 | 1.80505500  | -1.42199000 |
| C | -0.95609100 | 2.70826400  | -0.92068200 |
| H | -1.62528000 | 0.82046100  | -1.77149900 |
| H | -1.38734600 | 3.65353200  | -0.58737300 |
| C | 0.39692200  | 2.85011800  | -1.51980500 |
| C | 1.17387000  | 3.98459200  | -1.22654300 |
| C | 0.96259600  | 1.85532800  | -2.32786700 |
| C | 2.47665600  | 4.10869000  | -1.70153300 |
| H | 0.74479500  | 4.77070500  | -0.60967900 |
| C | 2.27029000  | 1.97213800  | -2.79769100 |
| H | 0.36759000  | 0.99120300  | -2.60447000 |
| C | 3.03600200  | 3.09221700  | -2.47980200 |
| H | 3.05618200  | 4.99438900  | -1.46251500 |
| H | 2.68869800  | 1.18606700  | -3.42010400 |
| H | 4.05353900  | 3.18184700  | -2.84667400 |

TS3RR-270

|   |            |             |            |
|---|------------|-------------|------------|
| C | 5.01193500 | -1.73637800 | 1.37859000 |
|---|------------|-------------|------------|

|   |             |             |             |
|---|-------------|-------------|-------------|
| C | 3.63288700  | -1.55737900 | 1.45827000  |
| C | 2.86109800  | -2.28150000 | 2.36386200  |
| C | 3.49933900  | -3.20084400 | 3.19240100  |
| C | 4.88263000  | -3.38494700 | 3.11678700  |
| C | 5.64786100  | -2.65261300 | 2.21260400  |
| C | 5.62514700  | -0.84002800 | 0.33611800  |
| C | 4.43484600  | -0.20953100 | -0.42280800 |
| C | 3.15799700  | -0.52894300 | 0.45322500  |
| H | 1.78957300  | -2.11783000 | 2.42626900  |
| H | 2.91823400  | -3.77805400 | 3.90421500  |
| H | 5.36390400  | -4.10708500 | 3.76873800  |
| H | 6.72236400  | -2.79852800 | 2.15328500  |
| H | 6.27740300  | -1.37397500 | -0.36264900 |
| H | 4.55277900  | 0.86714300  | -0.51624600 |
| H | 6.22798200  | -0.05207900 | 0.80018500  |
| H | 2.78368400  | 0.37798800  | 0.92625300  |
| N | 2.06871100  | -1.06748200 | -0.37912500 |
| O | 4.34757200  | -0.66231200 | -1.76458200 |
| C | 0.71174600  | -1.04339700 | -0.24980300 |
| C | 2.36096400  | -1.82426100 | -1.48335200 |
| N | 0.26888800  | -1.77251400 | -1.30278300 |
| N | 1.29250900  | -2.24808700 | -2.07826200 |
| C | 3.78880300  | -1.95252800 | -1.89219000 |
| H | 4.31087600  | -2.69127900 | -1.26773000 |
| H | 3.85280200  | -2.25768700 | -2.93646000 |
| C | -1.07574100 | -1.96816700 | -1.75792400 |
| C | -1.80793000 | -3.05110600 | -1.27236200 |
| C | -1.59546400 | -1.02598800 | -2.64803400 |
| C | -3.13346400 | -3.16305900 | -1.69191400 |
| C | -2.91871200 | -1.18761900 | -3.05018700 |

|   |             |             |             |
|---|-------------|-------------|-------------|
| C | -3.70646900 | -2.23475100 | -2.56575600 |
| H | -3.73624800 | -3.98592000 | -1.31613100 |
| H | -3.34759900 | -0.47019400 | -3.74591800 |
| C | -0.75991800 | 0.14862200  | -3.07855300 |
| H | 0.16013900  | -0.17452300 | -3.57476500 |
| H | -0.46911300 | 0.73790400  | -2.19906700 |
| H | -1.31775900 | 0.79618200  | -3.75752500 |
| C | -5.16227900 | -2.32323000 | -2.93930900 |
| H | -5.75578100 | -1.68029900 | -2.27910700 |
| H | -5.53972400 | -3.34302600 | -2.84166500 |
| H | -5.32887900 | -1.98417700 | -3.96459700 |
| C | -1.19370400 | -4.00513100 | -0.28490600 |
| H | -0.97184300 | -3.48602500 | 0.65490300  |
| H | -0.25360700 | -4.41482500 | -0.66505900 |
| H | -1.87366200 | -4.82987400 | -0.06829800 |
| C | -0.04053200 | -0.44822700 | 0.82921400  |
| O | 0.72366600  | -0.05233900 | 1.88279200  |
| C | -1.41827600 | -0.42013900 | 0.85208300  |
| C | -2.15683000 | 0.28130500  | 1.82261100  |
| H | -1.95839800 | -0.82324300 | 0.00465900  |
| H | -1.58865000 | 0.65322800  | 2.67173900  |
| C | -3.56604000 | -0.02070800 | 2.10842000  |
| C | -4.14241100 | 0.49179800  | 3.28030300  |
| C | -4.39194700 | -0.74962400 | 1.23580300  |
| C | -5.48922900 | 0.29475000  | 3.57061800  |
| H | -3.51810900 | 1.05879000  | 3.96744000  |
| C | -5.73754000 | -0.94133000 | 1.52304500  |
| H | -3.98614100 | -1.16594100 | 0.31707200  |
| C | -6.29701900 | -0.42052500 | 2.69039500  |
| H | -5.90689200 | 0.70149600  | 4.48679500  |

|   |             |             |             |
|---|-------------|-------------|-------------|
| H | -6.35611300 | -1.50396300 | 0.82950800  |
| H | -7.34811200 | -0.57617500 | 2.91139800  |
| H | 0.53792000  | 0.93744200  | 2.09205700  |
| C | 3.59009100  | 3.10693700  | 0.06667000  |
| C | 3.16496100  | 2.90955300  | -1.27605500 |
| C | 4.13291300  | 2.89835800  | -2.29720400 |
| C | 5.46333700  | 3.07824100  | -1.96239800 |
| C | 5.86016300  | 3.28306300  | -0.62291600 |
| C | 4.93427300  | 3.30492600  | 0.40663700  |
| C | 1.36843600  | 2.77343400  | 0.08306300  |
| C | 1.74846800  | 2.70456200  | -1.23930400 |
| H | 3.83858200  | 2.73645700  | -3.32969300 |
| H | 6.21972700  | 3.06249800  | -2.74045000 |
| H | 6.91201200  | 3.42474900  | -0.39656800 |
| H | 5.23544800  | 3.45512700  | 1.43829900  |
| H | 1.10009500  | 2.51508300  | -2.08282800 |
| N | 2.47893600  | 3.01633300  | 0.85894000  |
| H | 2.41369500  | 3.07346700  | 1.86562400  |
| C | 0.09607600  | 2.57636500  | 0.81091800  |
| O | 0.21557700  | 2.39467300  | 2.08117700  |
| C | -1.11956500 | 2.51610500  | 0.14370100  |
| C | -2.30397400 | 2.24168000  | 0.86383300  |
| H | -1.13837500 | 2.60110700  | -0.93872200 |
| H | -2.33988200 | 2.61623800  | 1.88465500  |
| C | -3.60006700 | 2.16380200  | 0.16976000  |
| C | -4.77216500 | 2.59771000  | 0.80248400  |
| C | -3.70519300 | 1.57839100  | -1.09914200 |
| C | -6.01024000 | 2.45791200  | 0.18470300  |
| H | -4.70505100 | 3.03569700  | 1.79437300  |
| C | -4.94257300 | 1.43692500  | -1.71847500 |

|   |             |            |             |
|---|-------------|------------|-------------|
| H | -2.80886900 | 1.20289500 | -1.58599200 |
| C | -6.10063000 | 1.87622600 | -1.07852300 |
| H | -6.90767800 | 2.79515500 | 0.69424000  |
| H | -5.00783700 | 0.97505600 | -2.69964600 |
| H | -7.06707700 | 1.76082000 | -1.55911300 |

TS3RS

|   |             |             |             |
|---|-------------|-------------|-------------|
| C | -4.59894400 | 0.17504900  | 2.64370800  |
| C | -3.23608200 | 0.22487700  | 2.36117900  |
| C | -2.30796300 | 0.57800900  | 3.33708900  |
| C | -2.77001600 | 0.87890200  | 4.61578700  |
| C | -4.13549700 | 0.82277200  | 4.90740300  |
| C | -5.05780800 | 0.47002500  | 3.92537800  |
| C | -5.39835200 | -0.21291900 | 1.42805800  |
| C | -4.40012000 | -0.18176900 | 0.24710200  |
| C | -2.96676800 | -0.11368700 | 0.90955000  |
| H | -1.24763500 | 0.60771000  | 3.10588200  |
| H | -2.06496600 | 1.15871000  | 5.39173900  |
| H | -4.48050800 | 1.06209600  | 5.90827900  |
| H | -6.11922600 | 0.43538400  | 4.15229800  |
| H | -6.23362600 | 0.46631900  | 1.22956300  |
| H | -4.47740500 | -1.07811300 | -0.36529000 |
| H | -5.82003400 | -1.21724700 | 1.53764700  |
| H | -2.44773600 | -1.06429900 | 0.78355100  |
| N | -2.14073000 | 0.92360900  | 0.27613900  |
| O | -4.67017700 | 0.87807400  | -0.65735200 |
| C | -0.78906000 | 1.07190300  | 0.15708900  |
| C | -2.72167800 | 2.06571900  | -0.20922900 |
| N | -0.64243500 | 2.29081100  | -0.42097000 |
| N | -1.84498400 | 2.90463600  | -0.65858800 |

|   |             |             |             |
|---|-------------|-------------|-------------|
| C | -4.21052800 | 2.13998000  | -0.22245200 |
| H | -4.59347700 | 2.39595100  | 0.77584500  |
| H | -4.54412800 | 2.89358500  | -0.93564800 |
| C | 0.56914400  | 3.01548400  | -0.67003700 |
| C | 1.22064000  | 3.60853200  | 0.41635800  |
| C | 1.06522600  | 3.05342000  | -1.97429200 |
| C | 2.44752400  | 4.21870300  | 0.16880800  |
| C | 2.29497900  | 3.68313100  | -2.17094800 |
| C | 3.00658700  | 4.24792200  | -1.11148200 |
| H | 2.98361500  | 4.67693200  | 0.99635300  |
| H | 2.71133500  | 3.71844100  | -3.17443800 |
| C | 0.32234800  | 2.38617100  | -3.09864900 |
| H | -0.71422300 | 2.73285100  | -3.14403500 |
| H | 0.31982000  | 1.30020800  | -2.94443200 |
| H | 0.80351300  | 2.60043400  | -4.05449000 |
| C | 4.36602800  | 4.85829200  | -1.32974300 |
| H | 4.54877700  | 5.05665800  | -2.38760800 |
| H | 5.14521200  | 4.17584800  | -0.97419800 |
| H | 4.47212800  | 5.79459600  | -0.77620100 |
| C | 0.64290500  | 3.53494700  | 1.80384500  |
| H | 0.81813900  | 2.54396100  | 2.23817100  |
| H | -0.43691300 | 3.70909400  | 1.79734900  |
| H | 1.11060100  | 4.27582100  | 2.45408000  |
| C | 0.22923800  | 0.17473700  | 0.60831900  |
| O | -0.20366000 | -0.80365200 | 1.49290900  |
| C | 1.56097800  | 0.34369800  | 0.30893600  |
| C | 2.59474300  | -0.50194900 | 0.76269000  |
| H | 1.82184600  | 1.12287500  | -0.39418000 |
| H | 2.38034800  | -1.07383600 | 1.66420200  |
| C | 3.99592300  | -0.07184300 | 0.60441300  |



|   |             |             |             |
|---|-------------|-------------|-------------|
| C | 4.95464500  | -0.41976800 | 1.56555700  |
| C | 4.42799600  | 0.62705900  | -0.53563600 |
| C | 6.29018600  | -0.06150700 | 1.41114700  |
| H | 4.64265800  | -0.98642900 | 2.43969900  |
| C | 5.76323900  | 0.98557800  | -0.68954900 |
| H | 3.71594300  | 0.87858700  | -1.31926800 |
| C | 6.70239500  | 0.64738600  | 0.28443700  |
| H | 7.01229400  | -0.34116400 | 2.17247900  |
| H | 6.07304800  | 1.52319300  | -1.58109000 |
| H | 7.74406200  | 0.92554400  | 0.16141400  |
| H | 0.03115500  | -1.65400000 | 1.09173900  |
| C | -3.16147700 | -1.59721800 | -2.54602700 |
| C | -3.20005900 | -2.78082100 | -1.75909100 |
| C | -4.43103800 | -3.43721900 | -1.57352700 |
| C | -5.56761400 | -2.90251000 | -2.15370600 |
| C | -5.50649300 | -1.72245200 | -2.92653300 |
| C | -4.31011500 | -1.05874300 | -3.13696900 |
| C | -1.08175400 | -2.00393100 | -1.80344400 |
| C | -1.86715000 | -3.01446400 | -1.29416100 |
| H | -4.48390300 | -4.34332600 | -0.97741400 |
| H | -6.52541700 | -3.39369300 | -2.01506600 |
| H | -6.41790800 | -1.32663200 | -3.36267300 |
| H | -4.26536900 | -0.14441700 | -3.71916000 |
| H | -1.53450800 | -3.83974100 | -0.68128600 |
| N | -1.86438600 | -1.15439800 | -2.54713900 |
| H | -1.47033700 | -0.36931700 | -3.04649500 |
| C | 0.37037200  | -1.69501300 | -1.69275000 |
| O | 0.82904900  | -0.76561800 | -2.40313400 |
| C | 1.12237100  | -2.46465100 | -0.77735000 |
| C | 2.46910400  | -2.12995600 | -0.54776900 |

|   |            |             |             |
|---|------------|-------------|-------------|
| H | 0.65155200 | -3.28828700 | -0.24878900 |
| H | 2.93123100 | -1.54658400 | -1.34303600 |
| C | 3.39102300 | -3.05598500 | 0.15005800  |
| C | 4.73630200 | -3.10871200 | -0.23175600 |
| C | 2.96332300 | -3.87324900 | 1.20550500  |
| C | 5.62576500 | -3.97103700 | 0.40328000  |
| H | 5.08382400 | -2.45689600 | -1.02913700 |
| C | 3.85097600 | -4.73098900 | 1.84446500  |
| H | 1.92887500 | -3.82722500 | 1.53669500  |
| C | 5.18584800 | -4.78719300 | 1.44177900  |
| H | 6.66460200 | -3.99961200 | 0.08962700  |
| H | 3.50326500 | -5.35671700 | 2.66052800  |
| H | 5.87775900 | -5.45855700 | 1.94026900  |

TS3RS-180

|   |            |             |             |
|---|------------|-------------|-------------|
| C | 5.25793900 | -2.87197000 | -1.08613200 |
| C | 4.19356100 | -2.54352400 | -0.24058200 |
| C | 2.94440900 | -3.13951800 | -0.40497200 |
| C | 2.77231200 | -4.05147100 | -1.44508600 |
| C | 3.83083000 | -4.37073400 | -2.29635100 |
| C | 5.08389300 | -3.78788000 | -2.11769400 |
| C | 6.51267800 | -2.13215600 | -0.70631700 |
| C | 6.19338400 | -1.65440800 | 0.72551400  |
| C | 4.64530200 | -1.53936500 | 0.80319500  |
| H | 2.12750000 | -2.91227300 | 0.26975300  |
| H | 1.80563200 | -4.52339300 | -1.58684700 |
| H | 3.68015100 | -5.08871900 | -3.09612900 |
| H | 5.91362600 | -4.04912600 | -2.76735900 |
| H | 6.67985200 | -1.29422900 | -1.39211900 |
| H | 6.48549200 | -2.43378800 | 1.43239500  |

|   |             |             |             |
|---|-------------|-------------|-------------|
| H | 7.40934900  | -2.75483000 | -0.73199400 |
| H | 4.25074700  | -1.72654800 | 1.80018400  |
| N | 4.28094300  | -0.14539000 | 0.43475900  |
| O | 6.86153500  | -0.48806000 | 1.15826400  |
| C | 3.04604000  | 0.36062000  | 0.16851300  |
| C | 5.19228500  | 0.81236600  | 0.06777400  |
| N | 3.27963000  | 1.56115300  | -0.39648700 |
| N | 4.61433800  | 1.85345400  | -0.44932500 |
| C | 6.65794500  | 0.63253700  | 0.32875200  |
| H | 7.20687200  | 0.55708600  | -0.61670800 |
| H | 7.03160800  | 1.50482400  | 0.86835700  |
| C | 2.30567000  | 2.52440300  | -0.81773700 |
| C | 1.80550100  | 2.43709700  | -2.12031200 |
| C | 1.88736500  | 3.48748600  | 0.10136700  |
| C | 0.79261000  | 3.32411000  | -2.47529300 |
| C | 0.86583900  | 4.34923600  | -0.29890100 |
| C | 0.29615500  | 4.26823100  | -1.57048600 |
| H | 0.37361200  | 3.27061200  | -3.47708300 |
| H | 0.50572400  | 5.09847900  | 0.40137900  |
| C | 2.54524800  | 3.60200200  | 1.45017100  |
| H | 3.52975100  | 4.07036400  | 1.35368300  |
| H | 2.69507300  | 2.61896800  | 1.90577900  |
| H | 1.94079100  | 4.20958900  | 2.12675300  |
| C | -0.85067800 | 5.16354800  | -1.95684400 |
| H | -0.81161200 | 5.42063100  | -3.01766700 |
| H | -0.84809200 | 6.08565100  | -1.37224700 |
| H | -1.80210400 | 4.65404900  | -1.77330100 |
| C | 2.33196200  | 1.40162900  | -3.07964800 |
| H | 2.11464000  | 0.38439800  | -2.73191700 |
| H | 3.41784900  | 1.48280300  | -3.18383800 |

|   |              |             |             |
|---|--------------|-------------|-------------|
| H | 1.87739300   | 1.52504900  | -4.06344900 |
| C | 1.79576500   | -0.26237500 | 0.51898300  |
| O | 1.89120800   | -1.16870900 | 1.55852600  |
| C | 0.64384500   | -0.09115700 | -0.19346600 |
| C | -0.61979200  | -0.69897700 | 0.07627000  |
| H | 0.69160300   | 0.60773500  | -1.01935500 |
| H | -0.56157700  | -1.56158700 | 0.74043800  |
| C | -1.55764700  | -0.88363400 | -1.05524600 |
| C | -2.59202400  | -1.81738600 | -0.91073500 |
| C | -1.52455200  | -0.11970800 | -2.23277400 |
| C | -3.56614600  | -1.97783400 | -1.89388300 |
| H | -2.63404500  | -2.41737800 | -0.00577200 |
| C | -2.48775000  | -0.28579300 | -3.21913800 |
| H | -0.75552200  | 0.63405700  | -2.38319600 |
| C | -3.52011100  | -1.21046000 | -3.05256900 |
| H | -4.36365400  | -2.70037800 | -1.74714500 |
| H | -2.44145500  | 0.31877200  | -4.12009000 |
| H | -4.27590400  | -1.33248600 | -3.82210800 |
| H | 1.68252800   | -0.71259400 | 2.39070200  |
| C | -7.34835300  | -0.18484000 | -0.24265900 |
| C | -7.22839800  | -1.08753400 | 0.85050000  |
| C | -8.34178400  | -1.87145400 | 1.20442500  |
| C | -9.51436300  | -1.74299300 | 0.48073400  |
| C | -9.60892000  | -0.84199300 | -0.60075500 |
| C | -8.53370000  | -0.05403200 | -0.97583500 |
| C | -5.26495600  | -0.00772500 | 0.57635900  |
| C | -5.89313100  | -0.95585200 | 1.35228900  |
| H | -8.27870100  | -2.56767900 | 2.03584300  |
| H | -10.37894800 | -2.34318000 | 0.74630300  |
| H | -10.54306700 | -0.76458400 | -1.14815900 |

|   |             |             |             |
|---|-------------|-------------|-------------|
| H | -8.60368400 | 0.64091600  | -1.80660600 |
| H | -5.45824500 | -1.49358900 | 2.18243900  |
| N | -6.14407700 | 0.44918100  | -0.37358400 |
| H | -5.85209600 | 1.14388200  | -1.04680300 |
| C | -3.89147400 | 0.58041800  | 0.53481200  |
| O | -3.70857200 | 1.49244900  | -0.30762700 |
| C | -2.93298000 | 0.06564300  | 1.42847100  |
| C | -1.58084000 | 0.48312300  | 1.33458900  |
| H | -3.22266400 | -0.73073300 | 2.10570200  |
| H | -1.45998800 | 1.41139800  | 0.77503400  |
| C | -0.69341000 | 0.38435400  | 2.52311700  |
| C | 0.26265100  | 1.37739400  | 2.76431300  |
| C | -0.74724400 | -0.71304700 | 3.39499600  |
| C | 1.15055500  | 1.27453600  | 3.83573600  |
| H | 0.30824500  | 2.23259600  | 2.09479400  |
| C | 0.13744500  | -0.82180000 | 4.46201900  |
| H | -1.47365200 | -1.50125300 | 3.21893100  |
| C | 1.09755700  | 0.16903100  | 4.68398700  |
| H | 1.88286000  | 2.05714100  | 4.01006800  |
| H | 0.08910600  | -1.68534900 | 5.11753600  |
| H | 1.79283900  | 0.08159200  | 5.51215200  |

TS3RS-270

|   |            |             |             |
|---|------------|-------------|-------------|
| C | 6.63388600 | -0.42916600 | 0.25253000  |
| C | 5.32761800 | -0.11395700 | 0.61678400  |
| C | 4.97533700 | 0.11039400  | 1.94440300  |
| C | 5.96670600 | 0.01037500  | 2.91724600  |
| C | 7.28045200 | -0.30514500 | 2.55933500  |
| C | 7.62406100 | -0.52453900 | 1.22743200  |
| C | 6.75832400 | -0.61787700 | -1.23753500 |

|   |             |             |             |
|---|-------------|-------------|-------------|
| C | 5.30747800  | -0.62119400 | -1.77521000 |
| C | 4.42271500  | -0.07214900 | -0.59362500 |
| H | 3.95272200  | 0.36253900  | 2.21138100  |
| H | 5.71875700  | 0.17890800  | 3.95993700  |
| H | 8.04107100  | -0.38382700 | 3.32949000  |
| H | 8.64549100  | -0.77299400 | 0.95534300  |
| H | 7.26052800  | -1.55012600 | -1.51451800 |
| H | 5.19902000  | 0.03064600  | -2.64305800 |
| H | 7.32756500  | 0.20009800  | -1.68974900 |
| H | 4.07148800  | 0.93359100  | -0.81486400 |
| N | 3.23640900  | -0.91892900 | -0.39386700 |
| O | 4.90826700  | -1.89886200 | -2.24588900 |
| C | 1.99068000  | -0.65145600 | 0.08224900  |
| C | 3.31068500  | -2.27122600 | -0.60184300 |
| N | 1.38352400  | -1.85964900 | 0.13417300  |
| N | 2.19806300  | -2.86682900 | -0.31096300 |
| C | 4.55839300  | -2.80776900 | -1.21992500 |
| H | 5.35571000  | -2.91112600 | -0.47119600 |
| H | 4.36620100  | -3.77968300 | -1.67344100 |
| C | 0.03686300  | -2.16652300 | 0.52628900  |
| C | -0.28039900 | -2.20507400 | 1.88479800  |
| C | -0.90909400 | -2.35738500 | -0.48736200 |
| C | -1.61928200 | -2.41247000 | 2.22162200  |
| C | -2.22820700 | -2.57481100 | -0.09988400 |
| C | -2.60357900 | -2.58776500 | 1.24708300  |
| H | -1.89848300 | -2.42367600 | 3.27207400  |
| H | -2.99099800 | -2.71194600 | -0.86133300 |
| C | -0.50764100 | -2.28841100 | -1.93575100 |
| H | 0.22223300  | -3.06516600 | -2.18153700 |
| H | -0.04203200 | -1.32286700 | -2.16466700 |

|   |             |             |             |
|---|-------------|-------------|-------------|
| H | -1.37746800 | -2.41214900 | -2.58269200 |
| C | -4.05194400 | -2.77699600 | 1.61515600  |
| H | -4.69138700 | -2.12292700 | 1.01159900  |
| H | -4.22383000 | -2.56346100 | 2.67218500  |
| H | -4.37057200 | -3.80587900 | 1.41835400  |
| C | 0.77182200  | -1.96954400 | 2.93447800  |
| H | 1.04650600  | -0.90906600 | 2.97231600  |
| H | 1.67992700  | -2.54066800 | 2.72199500  |
| H | 0.40184800  | -2.25767000 | 3.91935300  |
| C | 1.48346800  | 0.63885800  | 0.46507300  |
| O | 2.46377700  | 1.59789900  | 0.59287000  |
| C | 0.16376300  | 0.88309600  | 0.70308000  |
| C | -0.43128300 | 2.15212300  | 0.95447700  |
| H | -0.51754000 | 0.05631400  | 0.54908000  |
| H | 0.25606000  | 2.95338600  | 1.22772100  |
| C | -1.71418400 | 2.18720500  | 1.68535500  |
| C | -2.05978200 | 3.33486900  | 2.41511900  |
| C | -2.64011800 | 1.13436100  | 1.63348200  |
| C | -3.28432300 | 3.43450200  | 3.06168700  |
| H | -1.35241900 | 4.15955100  | 2.46605200  |
| C | -3.86852300 | 1.23487300  | 2.28185100  |
| H | -2.42462500 | 0.23210300  | 1.06900300  |
| C | -4.20020100 | 2.38325100  | 2.99537100  |
| H | -3.52795700 | 4.33356900  | 3.61966400  |
| H | -4.57129800 | 0.40755600  | 2.22037100  |
| H | -5.15744800 | 2.45868100  | 3.50168800  |
| H | 2.19841100  | 2.38982100  | 0.09767000  |
| C | -6.00546600 | -0.33160800 | -0.73841100 |
| C | -5.21435100 | -1.14852400 | -1.59453800 |
| C | -5.63718800 | -2.46340700 | -1.85822800 |

|   |             |             |             |
|---|-------------|-------------|-------------|
| C | -6.79658800 | -2.93064300 | -1.26211100 |
| C | -7.55958600 | -2.10673700 | -0.40926000 |
| C | -7.18008400 | -0.80106700 | -0.13988600 |
| C | -4.19287000 | 0.84722600  | -1.34118500 |
| C | -4.06905800 | -0.37259300 | -1.96472600 |
| H | -5.05380800 | -3.10459800 | -2.51396600 |
| H | -7.12743900 | -3.94687700 | -1.45169800 |
| H | -8.46342300 | -2.50239500 | 0.04289000  |
| H | -7.76725200 | -0.16542800 | 0.51535000  |
| H | -3.25338100 | -0.68022400 | -2.60384700 |
| N | -5.37035700 | 0.87695300  | -0.63681800 |
| H | -5.60335800 | 1.67275000  | -0.05846300 |
| C | -3.29219900 | 2.02868900  | -1.16901600 |
| O | -3.81966400 | 3.08285000  | -0.74408100 |
| C | -1.92313200 | 1.80505500  | -1.42199000 |
| C | -0.95609100 | 2.70826400  | -0.92068200 |
| H | -1.62528000 | 0.82046100  | -1.77149900 |
| H | -1.38734600 | 3.65353200  | -0.58737300 |
| C | 0.39692200  | 2.85011800  | -1.51980500 |
| C | 1.17387000  | 3.98459200  | -1.22654300 |
| C | 0.96259600  | 1.85532800  | -2.32786700 |
| C | 2.47665600  | 4.10869000  | -1.70153300 |
| H | 0.74479500  | 4.77070500  | -0.60967900 |
| C | 2.27029000  | 1.97213800  | -2.79769100 |
| H | 0.36759000  | 0.99120300  | -2.60447000 |
| C | 3.03600200  | 3.09221700  | -2.47980200 |
| H | 3.05618200  | 4.99438900  | -1.46251500 |
| H | 2.68869800  | 1.18606700  | -3.42010400 |
| H | 4.05353900  | 3.18184700  | -2.84667400 |



TS3SR

|   |             |             |             |
|---|-------------|-------------|-------------|
| C | -4.54397600 | -1.24155300 | -2.21069100 |
| C | -3.29266600 | -1.10081500 | -1.61480700 |
| C | -2.87290800 | -1.93881800 | -0.59299300 |
| C | -3.73670600 | -2.94590100 | -0.16782200 |
| C | -4.99107300 | -3.09905800 | -0.76068400 |
| C | -5.40465400 | -2.24861100 | -1.78617800 |
| C | -4.74097300 | -0.21434000 | -3.29751500 |
| C | -3.59091600 | 0.79887300  | -3.10383100 |
| C | -2.51753600 | 0.02355700  | -2.25611100 |
| H | -1.90582100 | -1.79757000 | -0.11827800 |
| H | -3.43506200 | -3.60043000 | 0.64377200  |
| H | -5.65622700 | -3.88314000 | -0.41301800 |
| H | -6.38505000 | -2.36601100 | -2.23812200 |
| H | -5.70369400 | 0.30162800  | -3.24432100 |
| H | -3.15920700 | 1.10922700  | -4.05657800 |
| H | -4.67077700 | -0.67841400 | -4.28716000 |
| H | -1.73851600 | -0.36350400 | -2.91161700 |
| N | -1.86523600 | 0.91340800  | -1.28850000 |
| O | -4.04757400 | 2.00916300  | -2.51068100 |
| C | -0.56247400 | 1.05180300  | -0.90135100 |
| C | -2.57161300 | 1.94257000  | -0.72510200 |
| N | -0.54450600 | 2.21322700  | -0.17953600 |
| N | -1.80968600 | 2.76211000  | -0.07545400 |
| C | -4.01173500 | 2.05570200  | -1.09486900 |
| H | -4.59874900 | 1.25028700  | -0.63288100 |
| H | -4.40842200 | 3.02076100  | -0.78031100 |
| C | 0.58190200  | 3.07940800  | 0.05912500  |
| C | 1.28435700  | 3.55676400  | -1.05820600 |
| C | 0.90175400  | 3.46779200  | 1.36489000  |

|   |             |             |             |
|---|-------------|-------------|-------------|
| C | 2.40863900  | 4.34643500  | -0.82855400 |
| C | 2.02768500  | 4.27343300  | 1.53577100  |
| C | 2.81056700  | 4.69424300  | 0.46130500  |
| H | 2.97548800  | 4.70945400  | -1.68241800 |
| H | 2.29819300  | 4.57806700  | 2.54358100  |
| C | 0.08356900  | 3.05225500  | 2.55684100  |
| H | 0.27524800  | 1.99832900  | 2.78148900  |
| H | -0.98582900 | 3.19863200  | 2.37473200  |
| H | 0.35868700  | 3.65097600  | 3.42696300  |
| C | 4.05965200  | 5.50483200  | 0.68450700  |
| H | 4.20797400  | 6.23225300  | -0.11701600 |
| H | 4.93798600  | 4.85127000  | 0.70311100  |
| H | 4.02158200  | 6.03807200  | 1.63670800  |
| C | 0.86217000  | 3.23666100  | -2.46843900 |
| H | -0.22726700 | 3.24751200  | -2.57405500 |
| H | 1.21869800  | 2.24817900  | -2.77599500 |
| H | 1.27690800  | 3.97397400  | -3.15740200 |
| C | 0.48281200  | 0.11975600  | -1.13511100 |
| O | 0.11528900  | -1.02296900 | -1.83520600 |
| C | 1.78019000  | 0.29978400  | -0.71483400 |
| C | 2.75879900  | -0.71559000 | -0.82250300 |
| H | 2.03161800  | 1.21466100  | -0.19474600 |
| H | 2.58923700  | -1.44165400 | -1.61618300 |
| C | 4.17528200  | -0.36240300 | -0.58706000 |
| C | 5.19096400  | -0.94452400 | -1.35380000 |
| C | 4.53666700  | 0.50337100  | 0.45694500  |
| C | 6.52922400  | -0.65194300 | -1.10545400 |
| H | 4.92293300  | -1.63680100 | -2.14813700 |
| C | 5.87382500  | 0.79711100  | 0.70320000  |
| H | 3.75932100  | 0.92445800  | 1.09237800  |

|   |             |             |             |
|---|-------------|-------------|-------------|
| C | 6.87639900  | 0.22339100  | -0.07880800 |
| H | 7.30239300  | -1.11166000 | -1.71349300 |
| H | 6.13572700  | 1.46733100  | 1.51636700  |
| H | 7.91936300  | 0.45056600  | 0.11725200  |
| H | 0.19843300  | -1.75779500 | -1.20878200 |
| C | -3.03707500 | -0.02134700 | 2.35111100  |
| C | -3.14218700 | -1.39236500 | 2.70091200  |
| C | -4.40247900 | -1.89978100 | 3.06058300  |
| C | -5.49624600 | -1.05129900 | 3.05382100  |
| C | -5.36565600 | 0.30838000  | 2.70149200  |
| C | -4.13787000 | 0.84316700  | 2.34806000  |
| C | -1.00463400 | -0.95155900 | 2.12213000  |
| C | -1.83428300 | -1.96221300 | 2.54393900  |
| H | -4.51629000 | -2.94659500 | 3.32763400  |
| H | -6.47498100 | -1.43445800 | 3.32421900  |
| H | -6.24343800 | 0.94653600  | 2.70951800  |
| H | -4.02501300 | 1.89092300  | 2.08219800  |
| H | -1.54245800 | -2.98885000 | 2.71598800  |
| N | -1.72867400 | 0.21477200  | 2.02064600  |
| H | -1.30303700 | 1.10531200  | 1.80958000  |
| C | 0.43231000  | -0.90354000 | 1.72962600  |
| O | 1.06943000  | 0.15844800  | 1.95800000  |
| C | 0.98387200  | -2.02117500 | 1.07222500  |
| C | 2.36092600  | -1.96525300 | 0.74019000  |
| H | 0.37046400  | -2.89095600 | 0.85401900  |
| H | 2.93664100  | -1.31726400 | 1.39950100  |
| C | 3.08913500  | -3.18179500 | 0.30228500  |
| C | 4.41562100  | -3.37432800 | 0.70520200  |
| C | 2.49480800  | -4.14508800 | -0.52350300 |
| C | 5.12201000  | -4.50939400 | 0.31553100  |

|   |            |             |             |
|---|------------|-------------|-------------|
| H | 4.89263400 | -2.62128500 | 1.32730100  |
| C | 3.19917200 | -5.27763700 | -0.91615700 |
| H | 1.47324900 | -4.00362300 | -0.86815200 |
| C | 4.51553100 | -5.46581300 | -0.49422700 |
| H | 6.14789700 | -4.64395900 | 0.64372700  |
| H | 2.72269100 | -6.01459900 | -1.55504400 |
| H | 5.06495300 | -6.35046100 | -0.79981000 |

TS3SR-180

|   |             |             |             |
|---|-------------|-------------|-------------|
| C | 1.80577600  | 0.54571300  | -1.03073900 |
| O | 2.56739600  | 1.70179500  | -1.07292300 |
| C | 0.45564600  | 0.51177900  | -1.24417700 |
| C | -0.36673700 | 1.64629000  | -1.49660100 |
| H | -0.03348500 | -0.44476800 | -1.12716200 |
| H | 0.14139700  | 2.51284400  | -1.92252600 |
| C | -1.70711800 | 1.42582700  | -2.05583700 |
| C | -2.28033500 | 2.38201200  | -2.90826100 |
| C | -2.47856900 | 0.30311500  | -1.70855000 |
| C | -3.56741300 | 2.21928700  | -3.40994400 |
| H | -1.69997000 | 3.26077100  | -3.17891200 |
| C | -3.76493100 | 0.13899700  | -2.21645300 |
| H | -2.07220000 | -0.44895800 | -1.03787900 |
| C | -4.31657600 | 1.09295600  | -3.06949200 |
| H | -3.98453000 | 2.96980900  | -4.07465800 |
| H | -4.34207200 | -0.73676500 | -1.93286800 |
| H | -5.31960100 | 0.96300100  | -3.46309500 |
| H | 1.98340500  | 2.46480100  | -0.96092500 |
| C | -4.18600900 | -2.00675200 | 2.53259800  |
| C | -5.10769200 | -0.92748500 | 2.44509800  |
| C | -6.45062100 | -1.15395200 | 2.79782600  |

|   |             |             |             |
|---|-------------|-------------|-------------|
| C | -6.83143200 | -2.41506600 | 3.22065700  |
| C | -5.89805300 | -3.47020500 | 3.30220300  |
| C | -4.56943700 | -3.28336000 | 2.96110500  |
| C | -3.07047200 | -0.19886500 | 1.80399800  |
| C | -4.37274700 | 0.20999600  | 1.97879200  |
| H | -7.17564000 | -0.34752600 | 2.73748800  |
| H | -7.86487600 | -2.60133200 | 3.49530600  |
| H | -6.22924300 | -4.44726100 | 3.63936100  |
| H | -3.84928600 | -4.09302800 | 3.02362600  |
| H | -4.76224300 | 1.20094000  | 1.79528000  |
| N | -2.96757600 | -1.52932300 | 2.13414700  |
| H | -2.08304600 | -2.01370900 | 2.07675700  |
| C | -1.82690200 | 0.46751200  | 1.33205900  |
| O | -0.79263600 | -0.25118800 | 1.26216200  |
| C | -1.87888300 | 1.81446200  | 0.93628900  |
| C | -0.71229200 | 2.39622900  | 0.39862700  |
| H | -2.82969200 | 2.33502800  | 0.91370500  |
| H | 0.21109900  | 1.96864200  | 0.78894900  |
| C | -0.65132600 | 3.85166100  | 0.11981800  |
| C | 0.54202300  | 4.55538400  | 0.32666300  |
| C | -1.75684300 | 4.55024600  | -0.38404000 |
| C | 0.63450500  | 5.91483200  | 0.04190600  |
| H | 1.40284000  | 4.03814200  | 0.74861000  |
| C | -1.66467600 | 5.90849200  | -0.67328400 |
| H | -2.68770000 | 4.02054100  | -0.56246700 |
| C | -0.47021800 | 6.59630600  | -0.46369300 |
| H | 1.56685500  | 6.44128300  | 0.22009000  |
| H | -2.53040600 | 6.43329400  | -1.06560600 |
| H | -0.40261900 | 7.65548300  | -0.68962300 |
| C | 4.28371200  | -0.11284500 | 2.91455000  |

|   |             |             |             |
|---|-------------|-------------|-------------|
| C | 3.76947500  | 0.60533900  | 1.83238800  |
| C | 2.70442700  | 1.48169100  | 2.00745600  |
| C | 2.13090700  | 1.60899700  | 3.27018400  |
| C | 2.63617000  | 0.88173300  | 4.34858800  |
| C | 3.72192900  | 0.02403100  | 4.17981300  |
| C | 5.44597700  | -0.97311800 | 2.49707800  |
| C | 5.82820700  | -0.37795500 | 1.12474800  |
| C | 4.53893500  | 0.29140500  | 0.56616000  |
| H | 2.34114600  | 2.06322500  | 1.17220800  |
| H | 1.29217600  | 2.28357100  | 3.41234400  |
| H | 2.18609100  | 0.99316200  | 5.32975300  |
| H | 4.12583300  | -0.52687600 | 5.02384000  |
| H | 5.13259600  | -2.01986100 | 2.41996400  |
| H | 6.55451700  | 0.42281900  | 1.27692800  |
| H | 6.28495500  | -0.93830300 | 3.19534200  |
| H | 4.74625900  | 1.16136100  | -0.05576700 |
| N | 3.83817000  | -0.70494200 | -0.28282600 |
| O | 6.43877800  | -1.26592500 | 0.21286800  |
| C | 2.59227700  | -0.63089900 | -0.83212500 |
| C | 4.27536300  | -1.99430200 | -0.46168200 |
| N | 2.33127200  | -1.88343800 | -1.26417700 |
| N | 3.37901700  | -2.73243000 | -1.03957200 |
| C | 5.66474800  | -2.40722800 | -0.07793000 |
| H | 5.63665600  | -3.11554600 | 0.75772000  |
| H | 6.13374700  | -2.90612400 | -0.92773300 |
| C | 1.16331300  | -2.33099800 | -1.96642300 |
| C | 0.14472100  | -2.94755000 | -1.23605100 |
| C | 1.06644500  | -2.04607000 | -3.33064500 |
| C | -1.03218600 | -3.25299100 | -1.91888100 |
| C | -0.13099300 | -2.36710600 | -3.96590500 |

|   |             |             |             |
|---|-------------|-------------|-------------|
| C | -1.19472600 | -2.94839400 | -3.27185300 |
| H | -1.84956500 | -3.71955200 | -1.37429500 |
| H | -0.24094600 | -2.14560100 | -5.02447500 |
| C | 2.19880000  | -1.37657100 | -4.06132600 |
| H | 3.15193500  | -1.87118500 | -3.85308600 |
| H | 2.29335600  | -0.32999400 | -3.75022400 |
| H | 2.02488600  | -1.39532500 | -5.13804600 |
| C | -2.50874900 | -3.20205200 | -3.96168500 |
| H | -3.05587300 | -4.01909000 | -3.48662700 |
| H | -2.36387400 | -3.44357900 | -5.01705500 |
| H | -3.13411900 | -2.30389900 | -3.90771900 |
| C | 0.28802500  | -3.18711600 | 0.24256200  |
| H | 0.17581300  | -2.23932900 | 0.78387000  |
| H | 1.26456900  | -3.61393500 | 0.48550300  |
| H | -0.48630200 | -3.87416700 | 0.59071900  |

TS3SR-270

|   |             |             |             |
|---|-------------|-------------|-------------|
| C | -6.63573700 | -0.15465700 | -0.64459500 |
| C | -5.28048100 | 0.13049800  | -0.51023000 |
| C | -4.57288600 | 0.80566800  | -1.49742200 |
| C | -5.25629500 | 1.20794900  | -2.64201200 |
| C | -6.61923600 | 0.93221900  | -2.78403900 |
| C | -7.31789800 | 0.25019800  | -1.78950800 |
| C | -7.15727800 | -0.90034800 | 0.55710000  |
| C | -5.90357300 | -1.28063000 | 1.38200000  |
| C | -4.73858900 | -0.39381700 | 0.79822100  |
| H | -3.51366700 | 1.01207600  | -1.37141600 |
| H | -4.73053400 | 1.73609300  | -3.43151700 |
| H | -7.13862300 | 1.24763400  | -3.68330400 |
| H | -8.37461000 | 0.03181000  | -1.91035300 |

|   |             |             |             |
|---|-------------|-------------|-------------|
| H | -7.71783300 | -1.80299300 | 0.29502500  |
| H | -6.03650000 | -1.05857100 | 2.44076300  |
| H | -7.82339700 | -0.26773800 | 1.15199300  |
| H | -4.48718700 | 0.40852200  | 1.48836800  |
| N | -3.52392600 | -1.19178200 | 0.58290000  |
| O | -5.63779500 | -2.67428800 | 1.34815800  |
| C | -2.19880800 | -0.88055400 | 0.62686800  |
| C | -3.62435700 | -2.50450800 | 0.20215100  |
| N | -1.57607900 | -2.03477500 | 0.28531400  |
| N | -2.46241700 | -3.04843100 | 0.03184100  |
| C | -4.98611500 | -3.11242700 | 0.17126600  |
| H | -5.53018600 | -2.81389600 | -0.73522800 |
| H | -4.91287400 | -4.19893300 | 0.20470700  |
| C | -0.16890800 | -2.29763900 | 0.18101200  |
| C | 0.47948500  | -2.86267600 | 1.28132200  |
| C | 0.49351200  | -1.92219900 | -0.98968100 |
| C | 1.86183500  | -3.02575900 | 1.19431900  |
| C | 1.87349600  | -2.10821100 | -1.03014800 |
| C | 2.57441600  | -2.63600100 | 0.05824800  |
| H | 2.39624300  | -3.43984200 | 2.04567500  |
| H | 2.42345200  | -1.81400500 | -1.91937400 |
| C | -0.26482500 | -1.30130700 | -2.13091400 |
| H | -0.75018500 | -0.37296700 | -1.80686300 |
| H | -1.04862200 | -1.97144200 | -2.49716000 |
| H | 0.40762700  | -1.06553600 | -2.95803100 |
| C | 4.07761800  | -2.70519000 | 0.02785800  |
| H | 4.46041300  | -3.40011500 | 0.77850600  |
| H | 4.49587500  | -1.71140200 | 0.23219700  |
| H | 4.44885700  | -3.00245300 | -0.95665300 |
| C | -0.28833100 | -3.20655500 | 2.52874600  |



|   |             |             |             |
|---|-------------|-------------|-------------|
| H | -1.11171000 | -3.89259300 | 2.31104700  |
| H | -0.72170600 | -2.30314300 | 2.97347300  |
| H | 0.36642400  | -3.66827900 | 3.26871300  |
| C | -1.62821400 | 0.39392300  | 0.97355700  |
| O | -2.55886900 | 1.40797600  | 1.05912300  |
| C | -0.31300600 | 0.53134200  | 1.32484800  |
| C | 0.37619100  | 1.69235900  | 1.77419900  |
| H | 0.28865500  | -0.36259400 | 1.23813700  |
| H | -0.24785300 | 2.48883500  | 2.17974700  |
| C | 1.63934800  | 1.45394800  | 2.50197200  |
| C | 2.01655100  | 2.27929500  | 3.57095000  |
| C | 2.52121900  | 0.43386400  | 2.11050400  |
| C | 3.22653900  | 2.09112800  | 4.22881500  |
| H | 1.34689100  | 3.07603600  | 3.88662700  |
| C | 3.73276800  | 0.24736600  | 2.76836600  |
| H | 2.28044000  | -0.20026800 | 1.26184000  |
| C | 4.09370300  | 1.07326900  | 3.82980300  |
| H | 3.49501100  | 2.73948300  | 5.05754900  |
| H | 4.39941900  | -0.54815800 | 2.44509300  |
| H | 5.03809500  | 0.92567100  | 4.34405700  |
| H | -2.18654300 | 2.21184400  | 0.66507700  |
| C | 6.20418800  | -0.08611400 | -1.14058000 |
| C | 5.38749800  | -0.46750500 | -2.24067000 |
| C | 5.86825300  | -1.43917700 | -3.13647200 |
| C | 7.11440400  | -2.00021500 | -2.91552500 |
| C | 7.90538400  | -1.60891900 | -1.81481100 |
| C | 7.46508900  | -0.65094100 | -0.91683800 |
| C | 4.27427000  | 1.05296500  | -0.99793700 |
| C | 4.16677800  | 0.27270600  | -2.12584500 |
| H | 5.26420500  | -1.74797900 | -3.98497100 |

|   |             |             |             |
|---|-------------|-------------|-------------|
| H | 7.49390900  | -2.75382200 | -3.59821800 |
| H | 8.87818900  | -2.06775000 | -1.66934300 |
| H | 8.06991100  | -0.35092400 | -0.06708900 |
| H | 3.32339900  | 0.25042400  | -2.80165800 |
| N | 5.50057200  | 0.84070400  | -0.41788700 |
| H | 5.78140100  | 1.35055900  | 0.40807400  |
| C | 3.36538700  | 2.02700300  | -0.32083600 |
| O | 3.90242400  | 2.84960600  | 0.45343600  |
| C | 1.98614800  | 1.90846900  | -0.61042000 |
| C | 1.04610400  | 2.67579300  | 0.10301100  |
| H | 1.66835600  | 1.11496600  | -1.28157500 |
| H | 1.50960400  | 3.45069200  | 0.71517100  |
| C | -0.25350900 | 3.08942600  | -0.48586500 |
| C | -1.00501600 | 4.10230300  | 0.13452400  |
| C | -0.76112100 | 2.51703600  | -1.65920500 |
| C | -2.23384300 | 4.50678200  | -0.37944300 |
| H | -0.61405100 | 4.57147800  | 1.03418000  |
| C | -1.98640100 | 2.92836500  | -2.18072300 |
| H | -0.17262100 | 1.77538900  | -2.18850900 |
| C | -2.73652700 | 3.91035600  | -1.53715700 |
| H | -2.79639500 | 5.28847900  | 0.12055700  |
| H | -2.35344100 | 2.47847600  | -3.09900000 |
| H | -3.69634600 | 4.21731200  | -1.93992800 |

TS3SS

|   |             |             |             |
|---|-------------|-------------|-------------|
| C | 0.38591700  | 0.43922400  | -0.80305700 |
| O | -0.87201300 | 0.24642800  | -1.34604600 |
| C | 1.25574800  | -0.59101600 | -0.52929400 |
| C | 1.00559200  | -1.96360100 | -0.71022100 |

|   |             |             |             |
|---|-------------|-------------|-------------|
| H | 2.18977200  | -0.30956300 | -0.05922300 |
| H | 0.15165600  | -2.25330600 | -1.31981500 |
| C | 2.10550400  | -2.93756200 | -0.70913400 |
| C | 1.81255400  | -4.26941300 | -1.05321000 |
| C | 3.41858300  | -2.63677300 | -0.31053300 |
| C | 2.79015800  | -5.25697600 | -1.00751000 |
| H | 0.79187000  | -4.51394400 | -1.34132000 |
| C | 4.39466900  | -3.62718500 | -0.26445000 |
| H | 3.69386300  | -1.62306600 | -0.03310900 |
| C | 4.08998500  | -4.94247000 | -0.61199500 |
| H | 2.53602800  | -6.27754500 | -1.27815100 |
| H | 5.40164700  | -3.36697400 | 0.05002400  |
| H | 4.85435700  | -5.71191000 | -0.57327000 |
| H | -1.23874700 | -0.55663900 | -0.94586800 |
| C | -5.65296900 | -2.43227300 | -1.16060300 |
| C | -5.72315600 | -1.45908100 | -0.12720200 |
| C | -6.94214900 | -0.79188100 | 0.09523000  |
| C | -8.03126600 | -1.10315600 | -0.69788300 |
| C | -7.93748200 | -2.07392300 | -1.71899800 |
| C | -6.75533200 | -2.74911600 | -1.96467800 |
| C | -3.63497900 | -2.31251800 | -0.18847700 |
| C | -4.42627700 | -1.40150100 | 0.47664300  |
| H | -7.02305600 | -0.04456200 | 0.87902700  |
| H | -8.97743700 | -0.59684000 | -0.53611500 |
| H | -8.81205200 | -2.29612200 | -2.32206500 |
| H | -6.67976700 | -3.49615700 | -2.74809300 |
| H | -4.12773800 | -0.77116400 | 1.30204100  |
| N | -4.37761200 | -2.92498100 | -1.16799900 |
| H | -3.97353400 | -3.62854600 | -1.76949700 |
| C | -2.21201800 | -2.72796800 | -0.06695900 |

|   |             |             |             |
|---|-------------|-------------|-------------|
| O | -1.80106700 | -3.59780600 | -0.87343700 |
| C | -1.40045800 | -2.08901700 | 0.90227900  |
| C | -0.06706700 | -2.51278800 | 1.04310500  |
| H | -1.82053500 | -1.32391000 | 1.54432700  |
| H | 0.12715700  | -3.53490600 | 0.72153700  |
| C | 0.81273800  | -2.02161600 | 2.11921900  |
| C | 1.87720800  | -2.81889100 | 2.56048300  |
| C | 0.64179300  | -0.75177800 | 2.69199900  |
| C | 2.74152600  | -2.36718700 | 3.55407300  |
| H | 2.02490500  | -3.79728100 | 2.11041200  |
| C | 1.50139300  | -0.30484500 | 3.68973900  |
| H | -0.15810500 | -0.10605900 | 2.34039500  |
| C | 2.55541400  | -1.10982300 | 4.12390300  |
| H | 3.56068800  | -2.99897200 | 3.88294100  |
| H | 1.35215400  | 0.67793900  | 4.12767100  |
| H | 3.22583000  | -0.75749200 | 4.90143100  |
| C | -2.05529000 | 3.83867400  | 1.45978400  |
| C | -1.90405700 | 2.68478300  | 0.68626800  |
| C | -2.17836500 | 1.43256800  | 1.22323100  |
| C | -2.55514900 | 1.34127200  | 2.56255100  |
| C | -2.67935600 | 2.49095900  | 3.34394900  |
| C | -2.44349800 | 3.74872400  | 2.79231500  |
| C | -1.77273800 | 5.07667600  | 0.65396500  |
| C | -1.84084100 | 4.54925600  | -0.79579700 |
| C | -1.47858100 | 3.03662400  | -0.72426500 |
| H | -2.11777100 | 0.54697900  | 0.60532000  |
| H | -2.76053500 | 0.36846900  | 3.00229800  |
| H | -2.97926500 | 2.40560100  | 4.38331700  |
| H | -2.56803400 | 4.64621200  | 3.39057900  |
| H | -0.78411500 | 5.47662000  | 0.90328400  |

S100

|   |             |             |             |
|---|-------------|-------------|-------------|
| H | -2.87475600 | 4.60298600  | -1.14288600 |
| H | -2.49686700 | 5.87640700  | 0.82334800  |
| H | -1.96810800 | 2.44558600  | -1.49653000 |
| N | -0.01074100 | 2.90826300  | -0.92570700 |
| O | -1.08673600 | 5.26471700  | -1.74864400 |
| C | 0.79357900  | 1.80845400  | -0.80162100 |
| C | 0.81808200  | 3.98894000  | -1.10952100 |
| N | 2.05400600  | 2.30144500  | -0.85654200 |
| N | 2.06824400  | 3.65484200  | -1.05399800 |
| C | 0.28295300  | 5.35200200  | -1.43305200 |
| H | 0.47770400  | 6.04845500  | -0.60979700 |
| H | 0.79532200  | 5.72688000  | -2.32091200 |
| C | 3.30099900  | 1.59238000  | -0.89061600 |
| C | 4.01997700  | 1.46169800  | 0.29743900  |
| C | 3.72926100  | 1.05901700  | -2.11005400 |
| C | 5.22391000  | 0.75736500  | 0.24466800  |
| C | 4.93279400  | 0.35875500  | -2.11039100 |
| C | 5.69005500  | 0.19832300  | -0.94628100 |
| H | 5.80057800  | 0.63326900  | 1.15756100  |
| H | 5.28749000  | -0.07645800 | -3.04149100 |
| C | 2.89700900  | 1.21537900  | -3.35310000 |
| H | 2.63556100  | 2.26411500  | -3.52311900 |
| H | 1.96258300  | 0.64982400  | -3.26489000 |
| H | 3.43690500  | 0.84694600  | -4.22635600 |
| C | 6.98092700  | -0.57669200 | -0.98918800 |
| H | 7.72984200  | -0.05091300 | -1.58920800 |
| H | 6.82526400  | -1.55771100 | -1.44701700 |
| H | 7.38987100  | -0.72383300 | 0.01223400  |
| C | 3.47631900  | 2.02626400  | 1.58207500  |
| H | 2.50908000  | 1.56969500  | 1.82263800  |

|           |             |             |             |
|-----------|-------------|-------------|-------------|
| H         | 3.32204000  | 3.10646000  | 1.50329300  |
| H         | 4.15777500  | 1.82800800  | 2.41081600  |
| TS3SS-180 |             |             |             |
| C         | 4.79763400  | -0.68453000 | -0.16786800 |
| C         | 3.41536900  | -0.62567100 | 0.00501800  |
| C         | 2.83481100  | -0.66340800 | 1.26531200  |
| C         | 3.67518200  | -0.76529000 | 2.37429000  |
| C         | 5.06010200  | -0.82081100 | 2.21046400  |
| C         | 5.63333900  | -0.77550500 | 0.93886300  |
| C         | 5.14120900  | -0.69022800 | -1.63692500 |
| C         | 3.82662200  | -1.10329500 | -2.33021700 |
| C         | 2.70696400  | -0.65983000 | -1.33523700 |
| H         | 1.75607900  | -0.58024900 | 1.39326700  |
| H         | 3.24665100  | -0.80082500 | 3.37157300  |
| H         | 5.69972500  | -0.90216900 | 3.08401700  |
| H         | 6.71122500  | -0.82438000 | 0.81658400  |
| H         | 5.94835700  | -1.37791900 | -1.90350600 |
| H         | 3.70127200  | -0.62699400 | -3.30308900 |
| H         | 5.43299800  | 0.31599900  | -1.96004900 |
| H         | 2.26332500  | 0.29446800  | -1.61746300 |
| N         | 1.64795500  | -1.67506300 | -1.29309400 |
| O         | 3.77575100  | -2.49990300 | -2.61167400 |
| C         | 0.35671500  | -1.57261800 | -0.86662100 |
| C         | 2.03534300  | -2.97903400 | -1.10885000 |
| N         | 0.04649000  | -2.82170900 | -0.43882700 |
| N         | 1.09135300  | -3.70205400 | -0.59879300 |
| C         | 3.42832900  | -3.33836800 | -1.52617100 |
| H         | 4.12094900  | -3.23167600 | -0.68116300 |
| H         | 3.45936000  | -4.36918000 | -1.88058400 |
| C         | -1.18803100 | -3.26711300 | 0.13077300  |

|   |             |             |             |
|---|-------------|-------------|-------------|
| C | -2.15784000 | -3.80256100 | -0.72042100 |
| C | -1.39360300 | -3.06995000 | 1.49870400  |
| C | -3.38543500 | -4.14286800 | -0.15795000 |
| C | -2.63837900 | -3.42857000 | 2.01555200  |
| C | -3.64525100 | -3.95196900 | 1.20169400  |
| H | -4.16274400 | -4.55226400 | -0.79815800 |
| H | -2.83105600 | -3.27804600 | 3.07490300  |
| C | -0.34766100 | -2.40108200 | 2.35087100  |
| H | -0.33991400 | -1.31610800 | 2.17010700  |
| H | 0.65409900  | -2.78259400 | 2.13212600  |
| H | -0.55685400 | -2.56152900 | 3.40983100  |
| C | -5.00626300 | -4.26300800 | 1.76580300  |
| H | -4.96615100 | -4.40158200 | 2.84809200  |
| H | -5.42621500 | -5.16458400 | 1.31359800  |
| H | -5.69477700 | -3.43707000 | 1.55702300  |
| C | -1.88369600 | -3.94627200 | -2.19256900 |
| H | -0.97127300 | -4.52224900 | -2.37066700 |
| H | -1.74591300 | -2.96108400 | -2.65180500 |
| H | -2.71508100 | -4.44337800 | -2.69389800 |
| C | -0.48576400 | -0.43202200 | -1.01649500 |
| O | -0.01532100 | 0.48710000  | -1.94247700 |
| C | -1.75136000 | -0.34551800 | -0.47830500 |
| C | -2.68983800 | 0.66021300  | -0.77310500 |
| H | -2.03260600 | -1.09127300 | 0.25379400  |
| H | -2.54210900 | 1.19549800  | -1.70917900 |
| C | -4.08923400 | 0.47992000  | -0.35642100 |
| C | -5.13039200 | 0.99436300  | -1.14308400 |
| C | -4.42893800 | -0.14300700 | 0.85659300  |
| C | -6.45818900 | 0.87369100  | -0.74836300 |
| H | -4.88452300 | 1.50728700  | -2.06991500 |

|   |             |             |             |
|---|-------------|-------------|-------------|
| C | -5.75780700 | -0.26474700 | 1.25048700  |
| H | -3.64703700 | -0.52582500 | 1.50899600  |
| C | -6.78198700 | 0.23940400  | 0.44981300  |
| H | -7.24341100 | 1.28185800  | -1.37768000 |
| H | -5.99261300 | -0.74612700 | 2.19563500  |
| H | -7.81749800 | 0.14688700  | 0.76075400  |
| H | -0.13868000 | 1.35781800  | -1.53339600 |
| C | 3.89990000  | 2.50846000  | 1.26437200  |
| C | 3.75492500  | 2.76020800  | -0.12631300 |
| C | 4.90530900  | 3.01044500  | -0.89557900 |
| C | 6.14176800  | 2.99989800  | -0.27396100 |
| C | 6.25966300  | 2.76070900  | 1.11171700  |
| C | 5.14711400  | 2.51914900  | 1.89797600  |
| C | 1.72279800  | 2.33393000  | 0.75779100  |
| C | 2.35686500  | 2.66158200  | -0.42003400 |
| H | 4.82119600  | 3.20537200  | -1.96109400 |
| H | 7.03825400  | 3.18899800  | -0.85614900 |
| H | 7.24445600  | 2.76363700  | 1.56836400  |
| H | 5.23590300  | 2.32146000  | 2.96148400  |
| H | 1.88825100  | 2.79381900  | -1.38593800 |
| N | 2.64824400  | 2.27555200  | 1.76870000  |
| H | 2.41203200  | 1.92417100  | 2.68532500  |
| C | 0.30694800  | 1.98459800  | 1.06768800  |
| O | 0.09187200  | 1.24516100  | 2.05588800  |
| C | -0.67181600 | 2.57592500  | 0.22674500  |
| C | -2.04102100 | 2.33323400  | 0.40982700  |
| H | -0.34158300 | 3.31665100  | -0.49622300 |
| H | -2.30667400 | 1.82389700  | 1.33547900  |
| C | -3.05308000 | 3.28975200  | -0.09273100 |
| C | -4.20963700 | 3.54119300  | 0.65256700  |



|   |             |            |             |
|---|-------------|------------|-------------|
| C | -2.89325400 | 3.94441300 | -1.32208000 |
| C | -5.17129400 | 4.43864400 | 0.19483900  |
| H | -4.35709400 | 3.01866500 | 1.59410200  |
| C | -3.85545200 | 4.83387100 | -1.78412100 |
| H | -2.01472000 | 3.74062500 | -1.92909300 |
| C | -4.99758000 | 5.08851500 | -1.02401300 |
| H | -6.06135600 | 4.62314100 | 0.78825700  |
| H | -3.71719000 | 5.32795100 | -2.74073300 |
| H | -5.74841300 | 5.78392100 | -1.38527200 |

TS3SS-270

|   |             |             |             |
|---|-------------|-------------|-------------|
| C | -6.79121600 | 0.19834300  | -0.28360600 |
| C | -5.41522700 | 0.40240100  | -0.25351900 |
| C | -4.73343200 | 0.94807200  | -1.33482900 |
| C | -5.46216400 | 1.29647100  | -2.46889500 |
| C | -6.84586600 | 1.10073500  | -2.50698900 |
| C | -7.51953000 | 0.55335000  | -1.41695300 |
| C | -7.27959900 | -0.41670400 | 1.00281700  |
| C | -6.00085400 | -0.82389900 | 1.77523400  |
| C | -4.81990300 | -0.07330700 | 1.05127300  |
| H | -3.65863600 | 1.10185600  | -1.29074700 |
| H | -4.95375200 | 1.71916300  | -3.33019300 |
| H | -7.40121900 | 1.37313100  | -3.39864500 |
| H | -8.59323800 | 0.39660000  | -1.45538400 |
| H | -7.91604800 | -1.29353000 | 0.84766900  |
| H | -6.04518500 | -0.51445400 | 2.81917300  |
| H | -7.86062400 | 0.30408700  | 1.58654000  |
| H | -4.44982300 | 0.74747500  | 1.66228700  |
| N | -3.69673100 | -0.98530000 | 0.79731200  |
| O | -5.83053800 | -2.23131300 | 1.83582300  |

|   |             |             |             |
|---|-------------|-------------|-------------|
| C | -2.35923800 | -0.77071700 | 0.67248600  |
| C | -3.92958000 | -2.30190000 | 0.49688000  |
| N | -1.85884900 | -1.97521500 | 0.31322000  |
| N | -2.83547700 | -2.93352700 | 0.21372900  |
| C | -5.32619000 | -2.80743100 | 0.64652700  |
| H | -5.93449900 | -2.54288100 | -0.22928200 |
| H | -5.32306500 | -3.89048400 | 0.76534200  |
| C | -0.52623100 | -2.29932800 | -0.10950500 |
| C | 0.35462800  | -2.86654200 | 0.81653000  |
| C | -0.18275000 | -2.04085300 | -1.43694800 |
| C | 1.63887200  | -3.16767300 | 0.37260800  |
| C | 1.12064700  | -2.35041100 | -1.83172500 |
| C | 2.03787900  | -2.91778500 | -0.94503700 |
| H | 2.34710900  | -3.60748800 | 1.07061200  |
| H | 1.41624000  | -2.16408600 | -2.86140200 |
| C | -1.20442100 | -1.49473100 | -2.39889700 |
| H | -1.67348200 | -0.58507600 | -2.00895500 |
| H | -2.00036300 | -2.22733000 | -2.56687500 |
| H | -0.74457400 | -1.25793400 | -3.36021200 |
| C | 3.42752700  | -3.29048600 | -1.38945900 |
| H | 3.59577200  | -4.36366500 | -1.25961600 |
| H | 4.18204800  | -2.76051900 | -0.80061100 |
| H | 3.58571800  | -3.04499100 | -2.44219400 |
| C | -0.07528400 | -3.10202700 | 2.23931200  |
| H | -0.98356200 | -3.70977200 | 2.28048200  |
| H | -0.29249800 | -2.15267400 | 2.74324100  |
| H | 0.71125800  | -3.60945300 | 2.79910600  |
| C | -1.66100200 | 0.46043800  | 0.91789300  |
| O | -2.48224000 | 1.56727200  | 0.98176700  |
| C | -0.33083600 | 0.49207400  | 1.23152600  |

|   |             |             |             |
|---|-------------|-------------|-------------|
| C | 0.43932600  | 1.62600900  | 1.62003900  |
| H | 0.19808300  | -0.45040600 | 1.16767600  |
| H | -0.14317600 | 2.47847800  | 1.97284200  |
| C | 1.66601200  | 1.34356400  | 2.39284500  |
| C | 2.06853300  | 2.18959900  | 3.43546600  |
| C | 2.49842700  | 0.26382400  | 2.05818500  |
| C | 3.25470200  | 1.96399200  | 4.12343100  |
| H | 1.43860300  | 3.03402800  | 3.70508800  |
| C | 3.69103600  | 0.04311100  | 2.74169200  |
| H | 2.23494000  | -0.39562900 | 1.23527500  |
| C | 4.07632400  | 0.89011500  | 3.77655900  |
| H | 3.54315100  | 2.62956800  | 4.93157200  |
| H | 4.32443100  | -0.79121000 | 2.45294900  |
| H | 5.00586800  | 0.71711800  | 4.30967000  |
| H | -2.08611000 | 2.27991600  | 0.45535100  |
| C | 6.72215000  | 0.22716900  | -0.64306800 |
| C | 5.95971600  | -0.60245900 | -1.51192200 |
| C | 6.60236200  | -1.67336800 | -2.16039400 |
| C | 7.95007500  | -1.88911800 | -1.93125300 |
| C | 8.68440400  | -1.05478300 | -1.06245100 |
| C | 8.08546100  | 0.00985000  | -0.41031300 |
| C | 4.61336200  | 0.99608900  | -0.66031300 |
| C | 4.62045300  | -0.09242100 | -1.50258000 |
| H | 6.04534500  | -2.31949700 | -2.83323000 |
| H | 8.45494000  | -2.71238600 | -2.42666600 |
| H | 9.74009100  | -1.25049000 | -0.90338700 |
| H | 8.64949800  | 0.65443600  | 0.25627300  |
| H | 3.77307100  | -0.48068200 | -2.05059700 |
| N | 5.87444800  | 1.18194000  | -0.15280900 |
| H | 6.06074600  | 1.93471000  | 0.49504500  |

|   |             |            |             |
|---|-------------|------------|-------------|
| C | 3.56390800  | 1.95048500 | -0.19450700 |
| O | 3.95624400  | 2.89733800 | 0.52595600  |
| C | 2.23602800  | 1.70477900 | -0.60805000 |
| C | 1.18932700  | 2.47353300 | -0.06016500 |
| H | 2.03532800  | 0.84606600 | -1.24172700 |
| H | 1.55998000  | 3.33262000 | 0.50046600  |
| C | -0.05440500 | 2.76697200 | -0.81661600 |
| C | -0.80045600 | 3.91585800 | -0.50648800 |
| C | -0.51170800 | 1.94085300 | -1.85135100 |
| C | -1.96241100 | 4.23101400 | -1.20826100 |
| H | -0.45458100 | 4.56973100 | 0.29041800  |
| C | -1.66815700 | 2.25882100 | -2.56030900 |
| H | 0.05688200  | 1.05413400 | -2.11629600 |
| C | -2.39997900 | 3.40254700 | -2.24108700 |
| H | -2.51990500 | 5.12673100 | -0.95461700 |
| H | -1.99925400 | 1.60943700 | -3.36689600 |
| H | -3.30127800 | 3.64895800 | -2.79297500 |

M3RR

|   |             |             |             |
|---|-------------|-------------|-------------|
| C | -2.58822900 | 3.32417700  | 1.70333000  |
| C | -2.25562500 | 2.27328500  | 0.84286800  |
| C | -2.39927500 | 0.94789700  | 1.24100700  |
| C | -2.84981900 | 0.68150700  | 2.53204000  |
| C | -3.16750300 | 1.72905800  | 3.39844500  |
| C | -3.04808400 | 3.05692600  | 2.98793700  |
| C | -2.39510700 | 4.65945000  | 1.03107000  |
| C | -2.36875400 | 4.26556200  | -0.46129200 |
| C | -1.80876100 | 2.81917400  | -0.49506200 |
| H | -2.17934200 | 0.13508200  | 0.56032700  |
| H | -2.94341900 | -0.35521600 | 2.83985700  |

|   |             |             |             |
|---|-------------|-------------|-------------|
| H | -3.52329100 | 1.50926400  | 4.40026800  |
| H | -3.31671500 | 3.86871900  | 3.65705000  |
| H | -1.45021100 | 5.11369600  | 1.35083300  |
| H | -3.39515100 | 4.21103100  | -0.83003000 |
| H | -3.19010800 | 5.37663500  | 1.24493900  |
| H | -2.14313800 | 2.23672000  | -1.35391900 |
| N | -0.32806500 | 2.92618500  | -0.60521100 |
| O | -1.70459100 | 5.14883800  | -1.34099700 |
| C | 0.58894800  | 1.94782400  | -0.49106600 |
| C | 0.36210100  | 4.08982800  | -0.82081700 |
| N | 1.77470200  | 2.54233800  | -0.62767300 |
| N | 1.64860600  | 3.88336600  | -0.83411600 |
| C | -0.35334700 | 5.39037200  | -1.02318800 |
| H | -0.24287500 | 6.01968700  | -0.13203300 |
| H | 0.09167300  | 5.91670900  | -1.86890000 |
| C | 3.05642500  | 1.88924400  | -0.69433800 |
| C | 3.92071100  | 1.99445200  | 0.39377300  |
| C | 3.34638700  | 1.15478600  | -1.84851500 |
| C | 5.12664400  | 1.29562400  | 0.31422800  |
| C | 4.55283000  | 0.46120200  | -1.86949800 |
| C | 5.44680700  | 0.51216300  | -0.79500100 |
| H | 5.81721900  | 1.34635000  | 1.15193100  |
| H | 4.79828700  | -0.13887200 | -2.74220700 |
| C | 2.38968200  | 1.13247800  | -3.01058700 |
| H | 2.10183700  | 2.14925800  | -3.29632700 |
| H | 1.47324000  | 0.58461500  | -2.76522600 |
| H | 2.85192500  | 0.65195000  | -3.87365900 |
| C | 6.71845400  | -0.29419500 | -0.83898900 |
| H | 7.30378100  | -0.05634400 | -1.73150800 |
| H | 6.48609600  | -1.36365200 | -0.87566500 |

|   |             |             |             |
|---|-------------|-------------|-------------|
| H | 7.33906900  | -0.10719400 | 0.03976900  |
| C | 3.55159800  | 2.81048800  | 1.60381000  |
| H | 2.59415900  | 2.48496300  | 2.02551300  |
| H | 3.44874300  | 3.86864600  | 1.34648600  |
| H | 4.31380200  | 2.71307200  | 2.37761700  |
| C | 0.31543400  | 0.51272000  | -0.32251500 |
| O | -0.62622400 | 0.09289100  | -1.17828400 |
| C | 0.98465500  | -0.13232000 | 0.64804900  |
| C | 0.86649500  | -1.53081000 | 1.19382800  |
| H | 1.68545700  | 0.49286700  | 1.19568000  |
| H | 0.04819300  | -1.51375000 | 1.92659700  |
| C | 2.14624900  | -1.90473800 | 1.91629100  |
| C | 2.10268100  | -2.69121800 | 3.06928200  |
| C | 3.39240800  | -1.51736000 | 1.41472400  |
| C | 3.27717700  | -3.07559500 | 3.71322800  |
| H | 1.13704600  | -3.00233500 | 3.46176100  |
| C | 4.56781700  | -1.88941800 | 2.06018000  |
| H | 3.43823800  | -0.93181400 | 0.49778000  |
| C | 4.51361000  | -2.67107300 | 3.21309500  |
| H | 3.22746100  | -3.68442500 | 4.61075100  |
| H | 5.52596600  | -1.57003800 | 1.65829100  |
| H | 5.42819600  | -2.96363900 | 3.71930900  |
| H | -0.88353100 | -0.91913900 | -0.88165000 |
| C | -5.64304200 | -2.16403000 | -0.04151000 |
| C | -5.27895700 | -2.13487200 | -1.41569600 |
| C | -6.29366600 | -2.02815400 | -2.38405900 |
| C | -7.61212000 | -1.95714700 | -1.97179100 |
| C | -7.95017200 | -1.98955200 | -0.60187500 |
| C | -6.97737900 | -2.09234800 | 0.37760400  |
| C | -3.40648200 | -2.31097700 | -0.17000200 |

|   |             |             |             |
|---|-------------|-------------|-------------|
| C | -3.85076700 | -2.22739900 | -1.46881800 |
| H | -6.04154900 | -2.00351000 | -3.44027400 |
| H | -8.40335100 | -1.87462900 | -2.71018200 |
| H | -8.99432700 | -1.93274600 | -0.31087000 |
| H | -7.23531800 | -2.11696000 | 1.43158000  |
| H | -3.23198000 | -2.22129000 | -2.35469200 |
| N | -4.48526800 | -2.26771200 | 0.68003000  |
| H | -4.36297400 | -2.31615100 | 1.68144100  |
| C | -2.05213200 | -2.40527800 | 0.46075200  |
| O | -2.02983300 | -2.37037100 | 1.71876900  |
| C | -0.93338300 | -2.42743300 | -0.39690100 |
| C | 0.44137200  | -2.66973400 | 0.19395600  |
| H | -1.10734900 | -2.82727000 | -1.39539600 |
| H | 0.41252800  | -3.56180900 | 0.83910700  |
| C | 1.51801000  | -2.90314200 | -0.84768800 |
| C | 2.54949700  | -3.81624000 | -0.60120400 |
| C | 1.54961600  | -2.18128300 | -2.04465400 |
| C | 3.59026300  | -3.99077600 | -1.50936000 |
| H | 2.54175800  | -4.38354800 | 0.32662300  |
| C | 2.58552300  | -2.35706100 | -2.96019200 |
| H | 0.74796400  | -1.48285300 | -2.26652900 |
| C | 3.61464300  | -3.25673800 | -2.69367200 |
| H | 4.38117200  | -4.70274900 | -1.29341800 |
| H | 2.58389700  | -1.79252600 | -3.88835600 |
| H | 4.42169600  | -3.39286900 | -3.40703300 |

M3RS

|   |            |             |            |
|---|------------|-------------|------------|
| C | 4.69606800 | -0.78639500 | 2.23985500 |
| C | 3.31788300 | -0.69250400 | 2.06130100 |
| C | 2.43278400 | -0.99463400 | 3.09323900 |

|   |             |             |             |
|---|-------------|-------------|-------------|
| C | 2.95475400  | -1.39717100 | 4.31953800  |
| C | 4.33669100  | -1.49005900 | 4.50573200  |
| C | 5.21524100  | -1.18319300 | 3.47008200  |
| C | 5.44285300  | -0.41098700 | 0.98806300  |
| C | 4.36385200  | -0.25029700 | -0.10771500 |
| C | 2.97891000  | -0.25943400 | 0.65100300  |
| H | 1.36063500  | -0.90540700 | 2.94658500  |
| H | 2.28400800  | -1.63905100 | 5.13735300  |
| H | 4.72803100  | -1.80781400 | 5.46688900  |
| H | 6.28857500  | -1.25936700 | 3.61604700  |
| H | 6.18083400  | -1.16125000 | 0.68565400  |
| H | 4.47913900  | 0.69460000  | -0.63401200 |
| H | 5.97985000  | 0.53438900  | 1.11714800  |
| H | 2.50923100  | 0.72403600  | 0.60266300  |
| N | 2.04639700  | -1.22416400 | 0.03107100  |
| O | 4.46657100  | -1.23388200 | -1.12564400 |
| C | 0.69636500  | -1.29866700 | 0.00552100  |
| C | 2.51932100  | -2.36690300 | -0.55640100 |
| N | 0.42353100  | -2.46813900 | -0.59075900 |
| N | 1.55271000  | -3.13628100 | -0.95793500 |
| C | 3.99421100  | -2.50605800 | -0.73620800 |
| H | 4.46815700  | -2.85796800 | 0.19105000  |
| H | 4.20701100  | -3.21552700 | -1.53564300 |
| C | -0.86934800 | -3.04225400 | -0.84469700 |
| C | -1.50245600 | -3.71813700 | 0.20040000  |
| C | -1.45292300 | -2.81701400 | -2.09267000 |
| C | -2.79639200 | -4.17455600 | -0.03484300 |
| C | -2.74990800 | -3.29646000 | -2.27690200 |
| C | -3.43704200 | -3.96178400 | -1.25891600 |
| H | -3.32236000 | -4.69746500 | 0.75985300  |



|   |             |             |             |
|---|-------------|-------------|-------------|
| H | -3.24007800 | -3.12833000 | -3.23235900 |
| C | -0.73465700 | -2.00895600 | -3.13944200 |
| H | 0.25284300  | -2.42960000 | -3.35193300 |
| H | -0.59576700 | -0.97260600 | -2.79860100 |
| H | -1.30942700 | -1.99136000 | -4.06663000 |
| C | -4.86006200 | -4.41334800 | -1.45349900 |
| H | -5.01202500 | -5.41988900 | -1.05589200 |
| H | -5.13880000 | -4.40911700 | -2.50905000 |
| H | -5.54101200 | -3.74104100 | -0.92043700 |
| C | -0.82433300 | -3.89118500 | 1.53266200  |
| H | -0.74638100 | -2.92867200 | 2.05136400  |
| H | 0.18775000  | -4.28927100 | 1.41677000  |
| H | -1.39413600 | -4.57018300 | 2.16812100  |
| C | -0.25066300 | -0.32003000 | 0.54100000  |
| O | 0.32011800  | 0.59139200  | 1.38042400  |
| C | -1.53669900 | -0.27422900 | 0.16041200  |
| C | -2.51451800 | 0.75323200  | 0.64918800  |
| H | -1.89531100 | -0.97741400 | -0.57679700 |
| H | -2.26587400 | 1.00587300  | 1.68863200  |
| C | -3.92435900 | 0.20166100  | 0.58541300  |
| C | -4.75633200 | 0.21348000  | 1.70538900  |
| C | -4.42649500 | -0.30602100 | -0.61869700 |
| C | -6.05715000 | -0.28167700 | 1.63219800  |
| H | -4.38057900 | 0.61683600  | 2.64228200  |
| C | -5.72494100 | -0.80028600 | -0.69624800 |
| H | -3.79622100 | -0.31399300 | -1.50611400 |
| C | -6.54470100 | -0.79312400 | 0.43218900  |
| H | -6.68919600 | -0.26811200 | 2.51461600  |
| H | -6.09849300 | -1.18856900 | -1.63928100 |
| H | -7.55712600 | -1.17978100 | 0.37344100  |

|   |             |            |             |
|---|-------------|------------|-------------|
| H | 0.01381900  | 1.46799600 | 1.00237000  |
| C | 3.34440300  | 2.26410000 | -2.20802100 |
| C | 3.44876500  | 3.02562800 | -1.00960800 |
| C | 4.72441700  | 3.43171000 | -0.57658000 |
| C | 5.83450700  | 3.07551400 | -1.32475400 |
| C | 5.70482300  | 2.32717500 | -2.51411600 |
| C | 4.46370000  | 1.91716200 | -2.97382500 |
| C | 1.28605500  | 2.45872000 | -1.32878200 |
| C | 2.12469300  | 3.13906600 | -0.47274200 |
| H | 4.83492500  | 4.00573900 | 0.33887600  |
| H | 6.82353600  | 3.37763300 | -0.99522700 |
| H | 6.59451800  | 2.06571100 | -3.07773200 |
| H | 4.36161900  | 1.33098900 | -3.88142500 |
| H | 1.83660300  | 3.63850100 | 0.44158300  |
| N | 2.02391900  | 1.94417000 | -2.36427000 |
| H | 1.57519200  | 1.37208500 | -3.06685800 |
| C | -0.16463400 | 2.08240100 | -1.30991700 |
| O | -0.52356400 | 1.26967900 | -2.22164200 |
| C | -0.94908200 | 2.55696300 | -0.26947400 |
| C | -2.38004100 | 2.09030500 | -0.18681100 |
| H | -0.61779800 | 3.40976000 | 0.31701100  |
| H | -2.70266500 | 1.83434900 | -1.20449600 |
| C | -3.33529200 | 3.11681200 | 0.38089500  |
| C | -4.51555700 | 3.43960000 | -0.29266200 |
| C | -3.08099800 | 3.73537600 | 1.60995000  |
| C | -5.41400000 | 4.36394500 | 0.23645500  |
| H | -4.73110300 | 2.95448900 | -1.24127100 |
| C | -3.97572500 | 4.65890000 | 2.14401700  |
| H | -2.17015900 | 3.49221300 | 2.15279800  |
| C | -5.14617500 | 4.97802300 | 1.45693700  |

|   |             |            |             |
|---|-------------|------------|-------------|
| H | -6.32383300 | 4.60318500 | -0.30551400 |
| H | -3.75982500 | 5.13156700 | 3.09744900  |
| H | -5.84388300 | 5.69878800 | 1.87142300  |

M3SR

|   |             |             |             |
|---|-------------|-------------|-------------|
| C | 4.27579500  | -1.51407100 | -1.03706900 |
| C | 3.12342100  | -0.96652300 | -1.61563000 |
| C | 3.03137400  | 0.40886200  | -1.81321300 |
| C | 4.05862700  | 1.22490000  | -1.34754600 |
| C | 5.15847900  | 0.68447900  | -0.68232200 |
| C | 5.28467700  | -0.69606900 | -0.54270800 |
| C | 4.27968400  | -3.01187900 | -1.17022300 |
| C | 3.30526600  | -3.19035500 | -2.35408800 |
| C | 2.23829600  | -2.07601900 | -2.15581000 |
| H | 2.19487900  | 0.83952400  | -2.34608300 |
| H | 3.99402000  | 2.29720100  | -1.48956800 |
| H | 5.92537300  | 1.34756900  | -0.29070400 |
| H | 6.16930800  | -1.12897300 | -0.08532000 |
| H | 3.91302300  | -3.49140000 | -0.25558800 |
| H | 3.83136300  | -2.94464200 | -3.27915900 |
| H | 5.26619600  | -3.42607300 | -1.38837200 |
| H | 1.70654100  | -1.81437500 | -3.06965700 |
| N | 1.20939100  | -2.63614200 | -1.20472200 |
| O | 2.77488000  | -4.47897500 | -2.54471400 |
| C | 0.11561100  | -2.08382600 | -0.60953400 |
| C | 1.21587200  | -3.96190700 | -0.82769600 |
| N | -0.41574700 | -3.06198900 | 0.13678900  |
| N | 0.25380800  | -4.23356800 | -0.00027800 |
| C | 2.15996600  | -4.98291100 | -1.38614700 |
| H | 2.89143400  | -5.28413100 | -0.62723000 |

|   |             |             |             |
|---|-------------|-------------|-------------|
| H | 1.58242800  | -5.86326600 | -1.67224900 |
| C | -1.57030000 | -3.01396600 | 0.99113600  |
| C | -2.80051800 | -3.38526100 | 0.44610100  |
| C | -1.40766200 | -2.52693800 | 2.28956400  |
| C | -3.92263000 | -3.23634600 | 1.25745100  |
| C | -2.56232500 | -2.39989500 | 3.06047000  |
| C | -3.82170900 | -2.73921600 | 2.55899500  |
| H | -4.89954100 | -3.49413300 | 0.85702600  |
| H | -2.47654400 | -2.00997100 | 4.07154700  |
| C | -0.06053100 | -2.07839100 | 2.78562000  |
| H | 0.19106400  | -1.10265600 | 2.34685500  |
| H | 0.71957500  | -2.79806300 | 2.52051500  |
| H | -0.07468700 | -1.96813500 | 3.87130200  |
| C | -5.05049000 | -2.57665200 | 3.41415100  |
| H | -4.99332100 | -1.66315900 | 4.01149800  |
| H | -5.15208600 | -3.41755300 | 4.10769000  |
| H | -5.95364700 | -2.53588800 | 2.80151400  |
| C | -2.90347200 | -3.84347900 | -0.98311000 |
| H | -2.21764000 | -4.67031100 | -1.18726800 |
| H | -2.64833200 | -3.02273100 | -1.66365500 |
| H | -3.91940000 | -4.16835400 | -1.21045700 |
| C | -0.47251400 | -0.77031000 | -0.87438800 |
| O | 0.20423300  | -0.03860100 | -1.79453300 |
| C | -1.61706500 | -0.33497900 | -0.31977800 |
| C | -2.30569800 | 0.91040000  | -0.79761700 |
| H | -2.08895800 | -0.88655500 | 0.47761400  |
| H | -2.10790100 | 1.00942700  | -1.87375800 |
| C | -3.80129100 | 0.79902400  | -0.57703500 |
| C | -4.69600100 | 1.06658900  | -1.61426200 |
| C | -4.31504100 | 0.47217500  | 0.68298700  |

|   |             |            |             |
|---|-------------|------------|-------------|
| C | -6.07187000 | 1.00076000 | -1.40541400 |
| H | -4.30737800 | 1.33838600 | -2.59258500 |
| C | -5.68916700 | 0.40237900 | 0.89527000  |
| H | -3.63575100 | 0.27061600 | 1.50960300  |
| C | -6.57286300 | 0.66498700 | -0.15015900 |
| H | -6.75251600 | 1.21163300 | -2.22447100 |
| H | -6.06954400 | 0.14567500 | 1.87958300  |
| H | -7.64434300 | 0.61050600 | 0.01400200  |
| H | 0.22811200  | 0.88657300 | -1.37737600 |
| C | 3.97753000  | 2.09258400 | 1.97531100  |
| C | 3.95606600  | 3.27205200 | 1.18110600  |
| C | 5.13735200  | 4.02459000 | 1.06027100  |
| C | 6.27774900  | 3.60338600 | 1.72456900  |
| C | 6.26962700  | 2.43777800 | 2.51956300  |
| C | 5.12488900  | 1.67003500 | 2.65555600  |
| C | 1.92857400  | 2.28539800 | 1.07436600  |
| C | 2.63757600  | 3.37684100 | 0.62994900  |
| H | 5.15368300  | 4.92373900 | 0.45073300  |
| H | 7.19464300  | 4.17805000 | 1.63774000  |
| H | 7.17813600  | 2.13676500 | 3.03178500  |
| H | 5.11816300  | 0.76575400 | 3.25607000  |
| H | 2.26352800  | 4.15788800 | -0.01644400 |
| N | 2.73654200  | 1.52456200 | 1.88371100  |
| H | 2.36656900  | 0.72768800 | 2.38178000  |
| C | 0.51362600  | 1.82379300 | 0.90843100  |
| O | 0.09184500  | 1.02195200 | 1.79517800  |
| C | -0.21143900 | 2.30051300 | -0.18300900 |
| C | -1.72388500 | 2.20259100 | -0.11827500 |
| H | 0.22213800  | 3.11130200 | -0.76285600 |
| H | -2.00993300 | 2.12867600 | 0.94091800  |

|   |             |            |             |
|---|-------------|------------|-------------|
| C | -2.41004500 | 3.40701800 | -0.72837900 |
| C | -3.41270200 | 4.09579000 | -0.04231000 |
| C | -2.08491800 | 3.82463700 | -2.02404400 |
| C | -4.06629200 | 5.17908800 | -0.62716300 |
| H | -3.68763000 | 3.77254900 | 0.95853600  |
| C | -2.73547600 | 4.90420000 | -2.61379700 |
| H | -1.30904100 | 3.29615300 | -2.57368600 |
| C | -3.72955600 | 5.58784100 | -1.91487000 |
| H | -4.84165000 | 5.70261400 | -0.07603700 |
| H | -2.46621500 | 5.21373000 | -3.61915000 |
| H | -4.23733400 | 6.43114200 | -2.37219400 |

M3SS

|   |             |            |             |
|---|-------------|------------|-------------|
| C | -3.19694800 | 3.48725200 | 0.97979600  |
| C | -2.32365800 | 2.46922400 | 0.60824100  |
| C | -1.99479900 | 1.44000100 | 1.48658300  |
| C | -2.54330500 | 1.45324000 | 2.76552500  |
| C | -3.41177000 | 2.47970000 | 3.14923300  |
| C | -3.74844500 | 3.49672500 | 2.25987200  |
| C | -3.43545700 | 4.45690700 | -0.14646300 |
| C | -2.52746900 | 3.97664400 | -1.30617900 |
| C | -1.83270600 | 2.65025700 | -0.80835900 |
| H | -1.34750300 | 0.62809800 | 1.16958600  |
| H | -2.29977800 | 0.65808600 | 3.46371300  |
| H | -3.83304600 | 2.47925900 | 4.14934500  |
| H | -4.43101000 | 4.28621500 | 2.55945100  |
| H | -3.19481700 | 5.49039400 | 0.12431900  |
| H | -3.11694000 | 3.73815700 | -2.19065700 |
| H | -4.48346100 | 4.45140300 | -0.45824900 |
| H | -2.08204000 | 1.80719000 | -1.44685000 |

|   |             |             |             |
|---|-------------|-------------|-------------|
| N | -0.35590100 | 2.78425900  | -0.84113200 |
| O | -1.62349500 | 4.97429200  | -1.74803500 |
| C | 0.62569400  | 1.85300500  | -0.80836800 |
| C | 0.25478900  | 4.00694900  | -0.76536900 |
| N | 1.76788100  | 2.55149000  | -0.73606100 |
| N | 1.54759800  | 3.89487800  | -0.70790800 |
| C | -0.58838400 | 5.23578800  | -0.82614700 |
| H | -0.97582100 | 5.48217100  | 0.17214000  |
| H | 0.00008600  | 6.07589500  | -1.19420600 |
| C | 3.11880000  | 2.06221300  | -0.65963000 |
| C | 3.68677900  | 1.92533400  | 0.60896000  |
| C | 3.76581900  | 1.70516000  | -1.84292900 |
| C | 4.97462800  | 1.39576700  | 0.67200200  |
| C | 5.04998300  | 1.17676100  | -1.72474700 |
| C | 5.66523800  | 1.01362700  | -0.48136100 |
| H | 5.44168900  | 1.26498300  | 1.64459800  |
| H | 5.57806900  | 0.87581200  | -2.62568500 |
| C | 3.07689300  | 1.83456800  | -3.17388400 |
| H | 2.62499600  | 2.82303500  | -3.29481700 |
| H | 2.27962300  | 1.08845900  | -3.26607300 |
| H | 3.78444900  | 1.67401400  | -3.98806100 |
| C | 7.05596500  | 0.44326100  | -0.38931300 |
| H | 7.80421900  | 1.22919700  | -0.53287300 |
| H | 7.21949300  | -0.31403100 | -1.15953800 |
| H | 7.23169500  | -0.00990700 | 0.58873900  |
| C | 2.90337800  | 2.28223500  | 1.84334200  |
| H | 1.97882600  | 1.69476200  | 1.89471400  |
| H | 2.62634600  | 3.34046900  | 1.84451300  |
| H | 3.48400900  | 2.07004300  | 2.74189400  |
| C | 0.44275300  | 0.39520000  | -0.84732100 |

|   |             |             |             |
|---|-------------|-------------|-------------|
| O | -0.81596400 | 0.03077600  | -1.16484500 |
| C | 1.43316200  | -0.46567100 | -0.54762000 |
| C | 1.27551600  | -1.95617400 | -0.63612000 |
| H | 2.38619300  | -0.07016600 | -0.23135500 |
| H | 0.61509800  | -2.18516000 | -1.48187900 |
| C | 2.59220900  | -2.67209700 | -0.85770700 |
| C | 2.58251400  | -3.86438300 | -1.58947800 |
| C | 3.80244100  | -2.23960200 | -0.30711400 |
| C | 3.74963600  | -4.59761500 | -1.78137600 |
| H | 1.63881000  | -4.21576400 | -2.00068500 |
| C | 4.97418200  | -2.96810300 | -0.50192800 |
| H | 3.84347500  | -1.33814800 | 0.29929900  |
| C | 4.95355500  | -4.14758700 | -1.24179800 |
| H | 3.72062300  | -5.51816400 | -2.35602900 |
| H | 5.90396000  | -2.61428600 | -0.06612300 |
| H | 5.86715100  | -4.71336300 | -1.39452100 |
| H | -1.01921900 | -0.81015700 | -0.58423800 |
| C | -5.34582800 | -2.92563100 | -1.02187000 |
| C | -5.38829300 | -1.87501500 | -0.06390500 |
| C | -6.63107900 | -1.29569600 | 0.24890400  |
| C | -7.77086900 | -1.76508600 | -0.38033000 |
| C | -7.70434000 | -2.81038100 | -1.32545500 |
| C | -6.49784600 | -3.40280200 | -1.65802900 |
| C | -3.24951200 | -2.54881500 | -0.31269400 |
| C | -4.04062600 | -1.65428400 | 0.37036400  |
| H | -6.69227500 | -0.49104500 | 0.97616800  |
| H | -8.73505500 | -1.32489100 | -0.14586900 |
| H | -8.61691400 | -3.15663600 | -1.80039000 |
| H | -6.44282300 | -4.20722400 | -2.38466100 |
| H | -3.69950200 | -0.91771800 | 1.08475300  |



|   |             |             |             |
|---|-------------|-------------|-------------|
| N | -4.03678400 | -3.30480500 | -1.14508400 |
| H | -3.62529900 | -4.00083300 | -1.75083700 |
| C | -1.77877900 | -2.83092800 | -0.34233400 |
| O | -1.38500900 | -3.64459700 | -1.22349500 |
| C | -0.95716300 | -2.12870900 | 0.54855900  |
| C | 0.49677500  | -2.54686000 | 0.60485600  |
| H | -1.41703000 | -1.69334500 | 1.43255900  |
| H | 0.55072100  | -3.63509400 | 0.45281400  |
| C | 1.21171200  | -2.21676500 | 1.89575100  |
| C | 2.15191500  | -3.10854500 | 2.42339100  |
| C | 1.00473100  | -1.00755800 | 2.56946700  |
| C | 2.86415300  | -2.80523400 | 3.58133600  |
| H | 2.32924000  | -4.05049200 | 1.91015200  |
| C | 1.71326600  | -0.69819200 | 3.72862100  |
| H | 0.27940500  | -0.29760500 | 2.18215800  |
| C | 2.64807700  | -1.59642400 | 4.23900000  |
| H | 3.58635600  | -3.51580000 | 3.97151100  |
| H | 1.53143600  | 0.24591100  | 4.23432800  |
| H | 3.19902900  | -1.35820000 | 5.14326600  |

TS4RR

|   |             |            |             |
|---|-------------|------------|-------------|
| C | -2.58457000 | 3.32946300 | 1.70068600  |
| C | -2.25103000 | 2.28034300 | 0.83858100  |
| C | -2.40083900 | 0.95406200 | 1.23106000  |
| C | -2.85884400 | 0.68457800 | 2.51881900  |
| C | -3.17739600 | 1.73023200 | 3.38726900  |
| C | -3.05165000 | 3.05915400 | 2.98208800  |
| C | -2.38395100 | 4.66605300 | 1.03306500  |
| C | -2.35321300 | 4.27596000 | -0.46033100 |
| C | -1.79614900 | 2.82860100 | -0.49558300 |

|   |             |             |             |
|---|-------------|-------------|-------------|
| H | -2.17944100 | 0.14491400  | 0.54645000  |
| H | -2.95814600 | -0.35247300 | 2.82391000  |
| H | -3.53898300 | 1.50809900  | 4.38649700  |
| H | -3.32111900 | 3.86932300  | 3.65283200  |
| H | -1.43845900 | 5.11566300  | 1.35764700  |
| H | -3.37854200 | 4.22455300  | -0.83252500 |
| H | -3.17699600 | 5.38570300  | 1.24591800  |
| H | -2.12742700 | 2.24856700  | -1.35726300 |
| N | -0.31514900 | 2.93258800  | -0.59841600 |
| O | -1.68432000 | 5.16014600  | -1.33551800 |
| C | 0.59868100  | 1.95128100  | -0.48311900 |
| C | 0.37840200  | 4.09466400  | -0.81152100 |
| N | 1.78621600  | 2.54305100  | -0.61710600 |
| N | 1.66429600  | 3.88493000  | -0.82282700 |
| C | -0.33334500 | 5.39738200  | -1.01307600 |
| H | -0.22420200 | 6.02433800  | -0.12007600 |
| H | 0.11550300  | 5.92471200  | -1.85612800 |
| C | 3.06595700  | 1.88644000  | -0.68456000 |
| C | 3.93020500  | 1.98633300  | 0.40398900  |
| C | 3.35421700  | 1.15398300  | -1.84046000 |
| C | 5.13414000  | 1.28412900  | 0.32318000  |
| C | 4.55845900  | 0.45664300  | -1.86269800 |
| C | 5.45225700  | 0.50234600  | -0.78779300 |
| H | 5.82452800  | 1.33069900  | 1.16129700  |
| H | 4.80238000  | -0.14217500 | -2.73672000 |
| C | 2.39809700  | 1.13857400  | -3.00316400 |
| H | 2.11969900  | 2.15780100  | -3.28976300 |
| H | 1.47634200  | 0.59960100  | -2.75804900 |
| H | 2.85681800  | 0.65345500  | -3.86553900 |
| C | 6.72149800  | -0.30776600 | -0.83343000 |

|   |             |             |             |
|---|-------------|-------------|-------------|
| H | 6.48586600  | -1.37615300 | -0.87877400 |
| H | 7.33985000  | -0.12919800 | 0.04867500  |
| H | 7.31060000  | -0.06519200 | -1.72222600 |
| C | 3.56273400  | 2.79995200  | 1.61613500  |
| H | 3.45700400  | 3.85825700  | 1.36066200  |
| H | 4.32711600  | 2.70291600  | 2.38786100  |
| H | 2.60701600  | 2.47177900  | 2.03970600  |
| C | 0.31931400  | 0.51541800  | -0.31993500 |
| O | -0.61759500 | 0.09860200  | -1.17706500 |
| C | 0.98619800  | -0.13057600 | 0.65287300  |
| C | 0.86354100  | -1.53103200 | 1.19331200  |
| H | 1.68662500  | 0.49186000  | 1.20402700  |
| H | 0.04820800  | -1.51468200 | 1.92919300  |
| C | 2.14281700  | -1.91551700 | 1.91132800  |
| C | 2.09727600  | -2.71277900 | 3.05684100  |
| C | 3.39004200  | -1.52822300 | 1.41247100  |
| C | 3.27069500  | -3.10825300 | 3.69595700  |
| H | 1.13074500  | -3.02381400 | 3.44724100  |
| C | 4.56450700  | -1.91124700 | 2.05330000  |
| H | 3.43720000  | -0.93414300 | 0.50118700  |
| C | 4.50831900  | -2.70403300 | 3.19847700  |
| H | 3.21932900  | -3.72545900 | 4.58766200  |
| H | 5.52355900  | -1.59182800 | 1.65359500  |
| H | 5.42224600  | -3.00527500 | 3.70082300  |
| H | -0.88008200 | -0.93955500 | -0.87330000 |
| C | -5.65366400 | -2.16314100 | -0.04041100 |
| C | -5.28860600 | -2.12051600 | -1.41384300 |
| C | -6.30255300 | -2.00802400 | -2.38250600 |
| C | -7.62134700 | -1.94414800 | -1.97087700 |
| C | -7.96047800 | -1.98941500 | -0.60141400 |

|   |             |             |             |
|---|-------------|-------------|-------------|
| C | -6.98874600 | -2.09853600 | 0.37814300  |
| C | -3.41712500 | -2.30290200 | -0.16838400 |
| C | -3.86025500 | -2.20857900 | -1.46667600 |
| H | -6.04928100 | -1.97336100 | -3.43812600 |
| H | -8.41217200 | -1.85720500 | -2.70913800 |
| H | -9.00506000 | -1.93769600 | -0.31101300 |
| H | -7.24769400 | -2.13307100 | 1.43156000  |
| H | -3.24033600 | -2.19301900 | -2.35161400 |
| N | -4.49665400 | -2.27043700 | 0.68157300  |
| H | -4.37757800 | -2.32860000 | 1.68279200  |
| C | -2.06204000 | -2.39841700 | 0.45814600  |
| O | -2.03452300 | -2.37996900 | 1.71317700  |
| C | -0.94059600 | -2.39969100 | -0.40631900 |
| C | 0.43135300  | -2.66125800 | 0.18785000  |
| H | -1.11832700 | -2.82301600 | -1.39526600 |
| H | 0.39165200  | -3.55732400 | 0.82656600  |
| C | 1.50728400  | -2.89822200 | -0.85382000 |
| C | 2.53315000  | -3.81820800 | -0.60899900 |
| C | 1.54377500  | -2.17368100 | -2.04904400 |
| C | 3.57343300  | -3.99672000 | -1.51691000 |
| H | 2.52168400  | -4.38758000 | 0.31755700  |
| C | 2.57925900  | -2.35360000 | -2.96430400 |
| H | 0.74683300  | -1.46926900 | -2.26899300 |
| C | 3.60287400  | -3.25999200 | -2.69945900 |
| H | 4.35998700  | -4.71389000 | -1.30221500 |
| H | 2.58156800  | -1.78689900 | -3.89114900 |
| H | 4.40951700  | -3.39919700 | -3.41270200 |

TS4RS

|   |            |             |            |
|---|------------|-------------|------------|
| C | 4.75725200 | -1.01438600 | 0.99479200 |
|---|------------|-------------|------------|

S124

|   |             |             |             |
|---|-------------|-------------|-------------|
| C | 3.38192200  | -0.94017300 | 1.20205800  |
| C | 2.83608400  | -0.91816900 | 2.48197900  |
| C | 3.70476900  | -0.97722000 | 3.56933600  |
| C | 5.08635000  | -1.04717800 | 3.37084700  |
| C | 5.62239100  | -1.06267200 | 2.08483200  |
| C | 5.09259700  | -0.99493800 | -0.47273100 |
| C | 3.74412100  | -1.17124900 | -1.20331200 |
| C | 2.64742300  | -0.86410100 | -0.11756500 |
| H | 1.76132300  | -0.84005200 | 2.61622300  |
| H | 3.30672500  | -0.96394400 | 4.57873500  |
| H | 5.74910300  | -1.08996300 | 4.22941300  |
| H | 6.69657200  | -1.11607900 | 1.93437100  |
| H | 5.78653000  | -1.78645200 | -0.77265700 |
| H | 3.64032100  | -0.47462900 | -2.03641400 |
| H | 5.54430500  | -0.03524700 | -0.74633200 |
| H | 2.20241500  | 0.11947000  | -0.27245900 |
| N | 1.56380000  | -1.84925700 | -0.20128700 |
| O | 3.61314900  | -2.45714400 | -1.80086500 |
| C | 0.23695500  | -1.72181000 | -0.03006100 |
| C | 1.80785200  | -3.15343800 | -0.52614300 |
| N | -0.26343900 | -2.94405400 | -0.23964000 |
| N | 0.70680500  | -3.84777800 | -0.56544100 |
| C | 3.20750600  | -3.49122700 | -0.92271200 |
| H | 3.85840600  | -3.56445400 | -0.04146200 |
| H | 3.23179300  | -4.43282100 | -1.47016400 |
| C | -1.64294900 | -3.33235700 | -0.12132600 |
| C | -2.20312100 | -3.38978800 | 1.15538300  |
| C | -2.36535900 | -3.56236400 | -1.29479100 |
| C | -3.56558300 | -3.67429200 | 1.23617800  |
| C | -3.72256000 | -3.84281900 | -1.15780800 |

|   |             |             |             |
|---|-------------|-------------|-------------|
| C | -4.33965000 | -3.88655200 | 0.09483300  |
| H | -4.03343500 | -3.72308600 | 2.21604800  |
| H | -4.31526200 | -4.01719300 | -2.05224500 |
| C | -1.70316100 | -3.47269800 | -2.64381700 |
| H | -0.92692500 | -4.23493500 | -2.75381600 |
| H | -1.22246600 | -2.49795800 | -2.78249100 |
| H | -2.43785200 | -3.60665200 | -3.43853200 |
| C | -5.82311800 | -4.12107600 | 0.20483200  |
| H | -6.36172900 | -3.17456300 | 0.08966000  |
| H | -6.08786400 | -4.53917200 | 1.17822600  |
| H | -6.17591100 | -4.79984600 | -0.57481000 |
| C | -1.38128900 | -3.11937200 | 2.38742300  |
| H | -1.20778700 | -2.04409000 | 2.51230100  |
| H | -0.40464500 | -3.60946400 | 2.33382400  |
| H | -1.89978500 | -3.47979700 | 3.27699400  |
| C | -0.46776100 | -0.49404100 | 0.36384200  |
| O | 0.23154700  | 0.27916900  | 1.20116200  |
| C | -1.67701400 | -0.19956000 | -0.14433600 |
| C | -2.45828700 | 1.01327400  | 0.30361100  |
| H | -2.12403500 | -0.87061400 | -0.86957300 |
| H | -2.31212300 | 1.10599600  | 1.39037000  |
| C | -3.93704200 | 0.83111400  | 0.03082800  |
| C | -4.87968600 | 1.03980600  | 1.03918700  |
| C | -4.39049300 | 0.48381700  | -1.24599400 |
| C | -6.24171800 | 0.89437200  | 0.78539100  |
| H | -4.53960500 | 1.32530500  | 2.03141400  |
| C | -5.75040100 | 0.33602200  | -1.50459300 |
| H | -3.67203400 | 0.33017900  | -2.04838500 |
| C | -6.68154600 | 0.53834300  | -0.48728900 |
| H | -6.96010700 | 1.05809900  | 1.58269700  |

|   |             |            |             |
|---|-------------|------------|-------------|
| H | -6.08352100 | 0.06334700 | -2.50124100 |
| H | -7.74215300 | 0.42213200 | -0.68662700 |
| H | 0.02948900  | 1.31551900 | 0.77756200  |
| C | 4.08895800  | 2.34343500 | -1.51776300 |
| C | 4.06423600  | 2.51516200 | -0.10644500 |
| C | 5.28478200  | 2.55674600 | 0.59284600  |
| C | 6.46850700  | 2.45344200 | -0.11560800 |
| C | 6.46900900  | 2.30708100 | -1.52102500 |
| C | 5.28701900  | 2.24584900 | -2.23900400 |
| C | 1.94115500  | 2.45712800 | -0.87034300 |
| C | 2.68563400  | 2.59135100 | 0.27870100  |
| H | 5.29219200  | 2.66590700 | 1.67336000  |
| H | 7.41609300  | 2.48624200 | 0.41247100  |
| H | 7.41572800  | 2.23298300 | -2.04653400 |
| H | 5.28362800  | 2.12575200 | -3.31758000 |
| H | 2.29328800  | 2.68169900 | 1.28172300  |
| N | 2.78838100  | 2.30378400 | -1.94261600 |
| H | 2.42908000  | 2.13833400 | -2.87243500 |
| C | 0.47562200  | 2.28383500 | -1.13439700 |
| O | 0.17993500  | 1.83515800 | -2.26226700 |
| C | -0.40963200 | 2.50076900 | -0.04389700 |
| C | -1.90151700 | 2.34151100 | -0.32129300 |
| H | -0.11110600 | 3.29156900 | 0.64425500  |
| H | -2.02897300 | 2.25103700 | -1.40831600 |
| C | -2.73631600 | 3.50711100 | 0.16597900  |
| C | -3.66126500 | 4.12591900 | -0.67729200 |
| C | -2.64408500 | 3.95276700 | 1.48949200  |
| C | -4.46715900 | 5.16673400 | -0.22013600 |
| H | -3.75416900 | 3.77946200 | -1.70344400 |
| C | -3.44866300 | 4.99013700 | 1.95302800  |

|   |             |            |             |
|---|-------------|------------|-------------|
| H | -1.93390400 | 3.48087400 | 2.16512200  |
| C | -4.36363800 | 5.60271400 | 1.09812000  |
| H | -5.17802000 | 5.63449900 | -0.89461600 |
| H | -3.36126600 | 5.32237400 | 2.98315700  |
| H | -4.99101400 | 6.41215100 | 1.45781900  |

TS4SR

|   |             |             |             |
|---|-------------|-------------|-------------|
| C | 4.71381500  | -1.80263700 | -1.07743900 |
| C | 3.42255900  | -1.38652800 | -0.76311400 |
| C | 3.16258900  | -0.56624800 | 0.33112900  |
| C | 4.24049400  | -0.16380700 | 1.11678200  |
| C | 5.54240700  | -0.55502300 | 0.79451900  |
| C | 5.78966500  | -1.37741400 | -0.30245500 |
| C | 4.71814900  | -2.70453900 | -2.28618200 |
| C | 3.23230800  | -3.04860000 | -2.54168900 |
| C | 2.42352300  | -1.96943300 | -1.73692300 |
| H | 2.14979300  | -0.24949900 | 0.57407200  |
| H | 4.06782700  | 0.46438500  | 1.98268900  |
| H | 6.36870200  | -0.21818800 | 1.41274900  |
| H | 6.80134500  | -1.69103800 | -0.54176900 |
| H | 5.29408100  | -3.62351100 | -2.14006300 |
| H | 2.97911800  | -2.98929700 | -3.60012200 |
| H | 5.14045200  | -2.19206500 | -3.15654300 |
| H | 1.99760400  | -1.21601600 | -2.39500300 |
| N | 1.31132800  | -2.59448100 | -1.00259800 |
| O | 2.91302700  | -4.38684600 | -2.18281600 |
| C | 0.12099000  | -2.11521400 | -0.58493800 |
| C | 1.47373700  | -3.82968200 | -0.43851500 |
| N | -0.38179600 | -3.07947100 | 0.20037300  |
| N | 0.45021000  | -4.15801400 | 0.29103800  |



|   |             |             |             |
|---|-------------|-------------|-------------|
| C | 2.70270000  | -4.59707800 | -0.80077200 |
| H | 3.55746500  | -4.26467700 | -0.19615700 |
| H | 2.54307500  | -5.66267200 | -0.63816500 |
| C | -1.58880100 | -3.05090400 | 0.98169500  |
| C | -2.71750200 | -3.69680600 | 0.47361400  |
| C | -1.57721600 | -2.33485900 | 2.18053000  |
| C | -3.89357700 | -3.59650600 | 1.21406200  |
| C | -2.77958800 | -2.26871900 | 2.88427700  |
| C | -3.94175900 | -2.88506800 | 2.41533900  |
| H | -4.79413000 | -4.07504000 | 0.83844100  |
| H | -2.80881000 | -1.71245800 | 3.81790200  |
| C | -0.34730600 | -1.61038800 | 2.65411700  |
| H | -0.25088200 | -0.63831400 | 2.15168800  |
| H | 0.56115600  | -2.18921700 | 2.46216500  |
| H | -0.41088700 | -1.42203100 | 3.72748600  |
| C | -5.22188800 | -2.79674800 | 3.20422900  |
| H | -5.23069800 | -3.54095400 | 4.00714900  |
| H | -6.09059900 | -2.98133400 | 2.56867800  |
| H | -5.33070000 | -1.81279300 | 3.66697100  |
| C | -2.66136800 | -4.41625100 | -0.84681500 |
| H | -1.89689900 | -5.19835400 | -0.83865100 |
| H | -2.41096300 | -3.71977600 | -1.65479300 |
| H | -3.62474200 | -4.87272400 | -1.07663200 |
| C | -0.43371100 | -0.79559000 | -0.94150000 |
| O | 0.46200100  | 0.02146600  | -1.49634700 |
| C | -1.72486100 | -0.49653000 | -0.69940300 |
| C | -2.37323600 | 0.81277400  | -1.08108500 |
| H | -2.35949200 | -1.24155500 | -0.24122000 |
| H | -2.10642500 | 1.03894200  | -2.12491000 |
| C | -3.88142800 | 0.69443600  | -0.97326900 |

|   |             |             |             |
|---|-------------|-------------|-------------|
| C | -4.71481000 | 1.12676900  | -2.00579000 |
| C | -4.46831500 | 0.19879600  | 0.19619900  |
| C | -6.10078900 | 1.06420400  | -1.87810600 |
| H | -4.27174000 | 1.52679800  | -2.91418400 |
| C | -5.85258900 | 0.13136200  | 0.32710100  |
| H | -3.83634600 | -0.13979000 | 1.01591400  |
| C | -6.67465900 | 0.56474400  | -0.71143700 |
| H | -6.73286000 | 1.40448600  | -2.69254500 |
| H | -6.28824300 | -0.25910200 | 1.24216100  |
| H | -7.75424300 | 0.51333600  | -0.61179100 |
| H | 0.20037600  | 1.05267900  | -1.08260800 |
| C | 3.89530900  | 3.10288400  | 1.53671100  |
| C | 3.95690000  | 3.37553100  | 0.14357800  |
| C | 5.17047600  | 3.82894200  | -0.40425800 |
| C | 6.26464800  | 3.99094900  | 0.42658400  |
| C | 6.17992200  | 3.71153500  | 1.80727400  |
| C | 5.00078700  | 3.26754900  | 2.38046100  |
| C | 1.88616600  | 2.63992400  | 0.65002000  |
| C | 2.66312000  | 3.07884100  | -0.39519100 |
| H | 5.24476700  | 4.04501800  | -1.46603200 |
| H | 7.20647000  | 4.33947000  | 0.01483700  |
| H | 7.05714500  | 3.84852900  | 2.43181500  |
| H | 4.93245600  | 3.05081000  | 3.44195900  |
| H | 2.35540900  | 3.15396600  | -1.42820000 |
| N | 2.62955200  | 2.65901600  | 1.80624200  |
| H | 2.24338200  | 2.33809700  | 2.68279200  |
| C | 0.48443300  | 2.12934900  | 0.75808100  |
| O | 0.19728300  | 1.55085000  | 1.83187000  |
| C | -0.34553300 | 2.24825700  | -0.38581700 |
| C | -1.84307800 | 2.01217400  | -0.21708300 |

|   |             |            |             |
|---|-------------|------------|-------------|
| H | -0.06430300 | 3.04997000 | -1.06766400 |
| H | -2.01685000 | 1.74034800 | 0.83249200  |
| C | -2.65505100 | 3.25405500 | -0.53430600 |
| C | -3.59003800 | 3.75721600 | 0.37250700  |
| C | -2.52064400 | 3.89411700 | -1.77160800 |
| C | -4.36509200 | 4.87262200 | 0.05875600  |
| H | -3.71638000 | 3.26275100 | 1.33233400  |
| C | -3.29461900 | 5.00521700 | -2.09233500 |
| H | -1.80339600 | 3.51442200 | -2.49588400 |
| C | -4.22088300 | 5.50052000 | -1.17537600 |
| H | -5.08398300 | 5.24993600 | 0.77979900  |
| H | -3.17459500 | 5.48592400 | -3.05856800 |
| H | -4.82415500 | 6.36827300 | -1.42259800 |

TS4SS

|   |             |            |             |
|---|-------------|------------|-------------|
| C | -3.11877400 | 3.55904400 | 1.05321400  |
| C | -2.26436200 | 2.52882100 | 0.67127400  |
| C | -1.98328000 | 1.46703600 | 1.52722100  |
| C | -2.55720700 | 1.46113600 | 2.79500400  |
| C | -3.40558200 | 2.50017600 | 3.18979100  |
| C | -3.69671400 | 3.54910600 | 2.32152500  |
| C | -3.31003500 | 4.56440600 | -0.05042600 |
| C | -2.40375600 | 4.08249000 | -1.21071000 |
| C | -1.74244300 | 2.73209500 | -0.73114300 |
| H | -1.35392400 | 0.64729400 | 1.19688700  |
| H | -2.34842600 | 0.64133400 | 3.47577800  |
| H | -3.84772600 | 2.48417000 | 4.18078600  |
| H | -4.36518400 | 4.34803400 | 2.62793600  |
| H | -3.03727100 | 5.58154400 | 0.25061600  |
| H | -2.99253200 | 3.87071700 | -2.10273300 |

|   |             |             |             |
|---|-------------|-------------|-------------|
| H | -4.35346900 | 4.60375300  | -0.37486800 |
| H | -1.99483400 | 1.90528200  | -1.38986100 |
| N | -0.26315600 | 2.83611900  | -0.74431300 |
| O | -1.47671200 | 5.06865500  | -1.63088700 |
| C | 0.69644800  | 1.88141800  | -0.74122700 |
| C | 0.37547600  | 4.04326600  | -0.65981300 |
| N | 1.85513400  | 2.55416400  | -0.67487700 |
| N | 1.66654900  | 3.90216000  | -0.62516300 |
| C | -0.44002600 | 5.29102600  | -0.69991300 |
| H | -0.82708500 | 5.52839600  | 0.30057100  |
| H | 0.16791100  | 6.12465600  | -1.05057300 |
| C | 3.19424000  | 2.02863200  | -0.68611600 |
| C | 3.83011600  | 1.82568900  | 0.53905400  |
| C | 3.75815500  | 1.68949100  | -1.91804000 |
| C | 5.09497700  | 1.23809600  | 0.50733700  |
| C | 5.02009200  | 1.10296600  | -1.89472000 |
| C | 5.69591600  | 0.86183100  | -0.69504700 |
| H | 5.61160900  | 1.05448400  | 1.44571800  |
| H | 5.48309100  | 0.81440300  | -2.83505200 |
| C | 2.99933200  | 1.89744200  | -3.20019200 |
| H | 2.57974400  | 2.90579900  | -3.25792200 |
| H | 2.16946800  | 1.18524900  | -3.27115500 |
| H | 3.65107000  | 1.74255200  | -4.06083100 |
| C | 7.04203800  | 0.18755500  | -0.71427000 |
| H | 7.75254000  | 0.75235500  | -1.32436800 |
| H | 6.95746900  | -0.81305600 | -1.14930400 |
| H | 7.45342000  | 0.08989600  | 0.29208900  |
| C | 3.13296100  | 2.15454400  | 1.83149500  |
| H | 2.25007200  | 1.51602100  | 1.95930300  |
| H | 2.79833600  | 3.19545000  | 1.85170400  |

|   |             |             |             |
|---|-------------|-------------|-------------|
| H | 3.79536800  | 1.98244100  | 2.68088600  |
| C | 0.46989500  | 0.42603700  | -0.80062000 |
| O | -0.78935100 | 0.09212800  | -1.09297200 |
| C | 1.45486900  | -0.45077400 | -0.51551700 |
| C | 1.27657800  | -1.94204800 | -0.61762900 |
| H | 2.42484800  | -0.07836700 | -0.22526000 |
| H | 0.66859000  | -2.15027500 | -1.50815800 |
| C | 2.60190900  | -2.66104400 | -0.76808300 |
| C | 2.67945900  | -3.77853300 | -1.60405200 |
| C | 3.74507600  | -2.28402100 | -0.05447100 |
| C | 3.86738300  | -4.49233900 | -1.74013700 |
| H | 1.79127700  | -4.08784700 | -2.15013300 |
| C | 4.93609300  | -2.99365100 | -0.18936700 |
| H | 3.70978100  | -1.43951000 | 0.62973000  |
| C | 5.00337000  | -4.09784100 | -1.03636200 |
| H | 3.90609200  | -5.35460900 | -2.39851100 |
| H | 5.81076400  | -2.68611200 | 0.37659300  |
| H | 5.93231000  | -4.64908900 | -1.14265300 |
| H | -1.00030400 | -0.82958900 | -0.47702000 |
| C | -5.40540500 | -2.89267600 | -1.15080200 |
| C | -5.44464000 | -1.82822400 | -0.20880500 |
| C | -6.68368400 | -1.23176700 | 0.08780000  |
| C | -7.82302400 | -1.69918200 | -0.54218700 |
| C | -7.75988000 | -2.75922900 | -1.47194900 |
| C | -6.55819700 | -3.36841800 | -1.78813700 |
| C | -3.31209700 | -2.52530500 | -0.43308400 |
| C | -4.09844400 | -1.61432600 | 0.23221900  |
| H | -6.74106100 | -0.41597700 | 0.80265000  |
| H | -8.78459500 | -1.24657100 | -0.32155200 |
| H | -8.67272200 | -3.10313600 | -1.94803300 |

|   |             |             |             |
|---|-------------|-------------|-------------|
| H | -6.50649100 | -4.18368100 | -2.50267900 |
| H | -3.75315500 | -0.87023500 | 0.93687900  |
| N | -4.10023000 | -3.28687400 | -1.26104500 |
| H | -3.70006900 | -3.99949400 | -1.85443400 |
| C | -1.84460600 | -2.80984000 | -0.43956100 |
| O | -1.43778500 | -3.63934800 | -1.28247500 |
| C | -1.02179300 | -2.05484300 | 0.43878300  |
| C | 0.41887500  | -2.53640800 | 0.56046400  |
| H | -1.50830000 | -1.70952500 | 1.35118900  |
| H | 0.43982300  | -3.62261900 | 0.38888300  |
| C | 1.06306800  | -2.26606100 | 1.90157500  |
| C | 1.88728400  | -3.23070400 | 2.48989100  |
| C | 0.90028600  | -1.04704200 | 2.57083500  |
| C | 2.53121500  | -2.98968100 | 3.70166700  |
| H | 2.02930300  | -4.18190100 | 1.98291400  |
| C | 1.54273000  | -0.79859000 | 3.78196400  |
| H | 0.26462900  | -0.28018500 | 2.13807700  |
| C | 2.36269800  | -1.77000000 | 4.35254300  |
| H | 3.16432300  | -3.75652800 | 4.13747500  |
| H | 1.39781400  | 0.15532400  | 4.28119100  |
| H | 2.86065600  | -1.57984000 | 5.29804400  |

M4RR

|   |            |            |             |
|---|------------|------------|-------------|
| C | 3.27969700 | 3.93249000 | 0.42469400  |
| C | 2.16750300 | 3.18471200 | 0.82169100  |
| C | 2.26799500 | 2.19906000 | 1.80018300  |
| C | 3.51977200 | 1.95602700 | 2.36421900  |
| C | 4.63555000 | 2.69413100 | 1.96390100  |
| C | 4.52391600 | 3.69287300 | 0.99714800  |
| C | 2.90568600 | 4.94574200 | -0.62701200 |

|   |             |             |             |
|---|-------------|-------------|-------------|
| C | 1.37325800  | 5.03214200  | -0.46133800 |
| C | 0.93825300  | 3.64215300  | 0.07028100  |
| H | 1.38319200  | 1.64728000  | 2.10602600  |
| H | 3.62711300  | 1.18267000  | 3.11838100  |
| H | 5.60123400  | 2.49411000  | 2.41784200  |
| H | 5.39118300  | 4.27523400  | 0.70101100  |
| H | 3.18589000  | 4.57888500  | -1.62146300 |
| H | 1.14397400  | 5.75651300  | 0.32316900  |
| H | 3.38398200  | 5.91792100  | -0.49098900 |
| H | 0.02908300  | 3.65298800  | 0.67203600  |
| N | 0.64613600  | 2.79235000  | -1.10814800 |
| O | 0.63929700  | 5.46440400  | -1.58969100 |
| C | 0.37578200  | 1.47445500  | -1.11599400 |
| C | 0.57409000  | 3.22824300  | -2.40366700 |
| N | 0.16548200  | 1.16468100  | -2.39315600 |
| N | 0.28152500  | 2.25264100  | -3.21546100 |
| C | 0.80358300  | 4.66914600  | -2.74278900 |
| H | 1.79581800  | 4.79479600  | -3.19232000 |
| H | 0.05759500  | 4.99330600  | -3.46991700 |
| C | -0.32462500 | -0.09021400 | -2.89127400 |
| C | 0.52673300  | -0.89624500 | -3.64465000 |
| C | -1.65248400 | -0.42245300 | -2.60257300 |
| C | 0.00841700  | -2.10498700 | -4.11077200 |
| C | -2.11221600 | -1.65339000 | -3.06689600 |
| C | -1.29508300 | -2.50710700 | -3.81436100 |
| H | 0.64496600  | -2.75142500 | -4.71019700 |
| H | -3.13768200 | -1.94589800 | -2.85358600 |
| C | -2.53707600 | 0.52671500  | -1.83695100 |
| H | -2.48944400 | 1.53059400  | -2.27231000 |
| H | -2.23491200 | 0.60887300  | -0.78524900 |

|   |             |             |             |
|---|-------------|-------------|-------------|
| H | -3.57525800 | 0.19185400  | -1.86825300 |
| C | -1.80336900 | -3.85339200 | -4.25799600 |
| H | -1.68575100 | -4.58395700 | -3.44996400 |
| H | -1.24863100 | -4.22166200 | -5.12378800 |
| H | -2.86451900 | -3.81262200 | -4.51428500 |
| C | 1.94048700  | -0.47061100 | -3.93539200 |
| H | 2.48297800  | -0.25363500 | -3.00931600 |
| H | 1.95857500  | 0.43922900  | -4.54225500 |
| H | 2.47511700  | -1.25634800 | -4.47047400 |
| C | 0.22460500  | 0.63424500  | 0.11558900  |
| O | -0.57795900 | 1.13576600  | 0.97886900  |
| C | 1.02225000  | -0.46798000 | 0.18513300  |
| C | 1.05711300  | -1.25007500 | 1.46570800  |
| H | 1.63918300  | -0.74405600 | -0.66451200 |
| H | 0.64527600  | -0.58488500 | 2.23364700  |
| C | 2.45319400  | -1.63743800 | 1.91035900  |
| C | 2.79101400  | -1.54040100 | 3.26371300  |
| C | 3.41875000  | -2.11961500 | 1.02062200  |
| C | 4.06047900  | -1.89316900 | 3.71781200  |
| H | 2.04440600  | -1.17584400 | 3.96654800  |
| C | 4.68877800  | -2.47392800 | 1.46824900  |
| H | 3.17124500  | -2.23063400 | -0.03209800 |
| C | 5.01703200  | -2.35686400 | 2.81769000  |
| H | 4.30211400  | -1.80216700 | 4.77256300  |
| H | 5.42458900  | -2.84463800 | 0.76096000  |
| H | 6.00873400  | -2.62962700 | 3.16458600  |
| H | -1.37995800 | -1.49911300 | 0.22269200  |
| C | -4.99232700 | 0.74690100  | 2.38777100  |
| C | -5.23833600 | 0.08536800  | 1.15440000  |
| C | -6.43233000 | 0.35506000  | 0.45934100  |



|   |             |             |             |
|---|-------------|-------------|-------------|
| C | -7.32831100 | 1.25818700  | 0.99706400  |
| C | -7.06287700 | 1.90595000  | 2.22485500  |
| C | -5.90181200 | 1.66392700  | 2.93437200  |
| C | -3.24270200 | -0.57784200 | 1.95605600  |
| C | -4.10948400 | -0.75540100 | 0.90470200  |
| H | -6.63936900 | -0.14004300 | -0.48477600 |
| H | -8.25224700 | 1.47860200  | 0.47267200  |
| H | -7.78829900 | 2.61029000  | 2.61918000  |
| H | -5.69805000 | 2.16175900  | 3.87651700  |
| H | -3.95458400 | -1.41181100 | 0.05976600  |
| N | -3.78149800 | 0.31475000  | 2.85198000  |
| H | -3.30601600 | 0.59884700  | 3.69591200  |
| C | -1.93804500 | -1.19663900 | 2.25355200  |
| O | -1.43328800 | -1.03956000 | 3.35360700  |
| C | -1.33110800 | -2.05589100 | 1.16723400  |
| C | 0.10199300  | -2.49193500 | 1.47018400  |
| H | -1.98080500 | -2.93355700 | 1.04513800  |
| H | 0.12117500  | -2.89038200 | 2.49224500  |
| C | 0.57867200  | -3.57807700 | 0.53297100  |
| C | 1.25101800  | -4.69181900 | 1.04334500  |
| C | 0.41501100  | -3.47726100 | -0.85422600 |
| C | 1.74869500  | -5.68252100 | 0.20066100  |
| H | 1.39494000  | -4.77347300 | 2.11806500  |
| C | 0.91552300  | -4.46506400 | -1.70026600 |
| H | -0.09352500 | -2.61433900 | -1.27862000 |
| C | 1.58231700  | -5.57151400 | -1.17742100 |
| H | 2.26683100  | -6.53898500 | 0.62112700  |
| H | 0.78526200  | -4.36500700 | -2.77414600 |
| H | 1.96877300  | -6.33964300 | -1.83988600 |

## M4RS

|   |             |             |             |
|---|-------------|-------------|-------------|
| C | 4.84524800  | -0.77357500 | 2.23402900  |
| C | 3.46481900  | -0.69854600 | 2.06794600  |
| C | 2.58571200  | -1.07655200 | 3.07870300  |
| C | 3.12187200  | -1.55186400 | 4.27313900  |
| C | 4.50646300  | -1.63529400 | 4.44712600  |
| C | 5.37716600  | -1.24293600 | 3.43290500  |
| C | 5.57080200  | -0.28539200 | 1.00727700  |
| C | 4.48181900  | -0.12691200 | -0.07838200 |
| C | 3.10894300  | -0.17677500 | 0.69275200  |
| H | 1.51551500  | -0.96809800 | 2.92430900  |
| H | 2.46082500  | -1.85584700 | 5.07836400  |
| H | 4.90733300  | -2.00943300 | 5.38396200  |
| H | 6.45222100  | -1.30736700 | 3.57269700  |
| H | 6.35146800  | -0.97016200 | 0.66111700  |
| H | 4.57759300  | 0.82143500  | -0.60131200 |
| H | 6.04916900  | 0.68230600  | 1.19390200  |
| H | 2.61765800  | 0.79650100  | 0.73188900  |
| N | 2.17985800  | -1.09486400 | 0.01812900  |
| O | 4.59904900  | -1.10181800 | -1.10753000 |
| C | 0.83325300  | -1.11299000 | -0.03880100 |
| C | 2.63612500  | -2.22816400 | -0.59475500 |
| N | 0.53774200  | -2.25920300 | -0.67281200 |
| N | 1.65618400  | -2.95621500 | -1.03857200 |
| C | 4.11177800  | -2.38095600 | -0.75414200 |
| H | 4.56946200  | -2.75671500 | 0.17162600  |
| H | 4.33477400  | -3.07130100 | -1.56748800 |
| C | -0.75061600 | -2.85092500 | -0.91934700 |
| C | -1.42460800 | -3.44531200 | 0.14964600  |
| C | -1.26971100 | -2.78006400 | -2.21221400 |

|   |             |             |             |
|---|-------------|-------------|-------------|
| C | -2.67775600 | -3.99181000 | -0.11627500 |
| C | -2.52685800 | -3.34448800 | -2.42686200 |
| C | -3.24185900 | -3.95139000 | -1.39310800 |
| H | -3.23282000 | -4.45103700 | 0.69828100  |
| H | -2.96179000 | -3.29420700 | -3.42191300 |
| C | -0.52167700 | -2.05752300 | -3.30107700 |
| H | 0.46855400  | -2.49360800 | -3.46048700 |
| H | -0.37978400 | -1.00236900 | -3.03490500 |
| H | -1.07577100 | -2.09947100 | -4.23983100 |
| C | -4.59559200 | -4.56298300 | -1.64155100 |
| H | -4.52302700 | -5.65381300 | -1.69954800 |
| H | -5.02535000 | -4.20464700 | -2.57966100 |
| H | -5.28485400 | -4.31830600 | -0.82891400 |
| C | -0.84821500 | -3.43239400 | 1.53890100  |
| H | -0.96775300 | -2.43687100 | 1.98277600  |
| H | 0.21938900  | -3.67179400 | 1.53688700  |
| H | -1.36352800 | -4.15283700 | 2.17591800  |
| C | -0.07772400 | -0.08230800 | 0.57992300  |
| O | 0.42383800  | 0.57922800  | 1.54914000  |
| C | -1.31911900 | -0.02211900 | 0.01009600  |
| C | -2.43447200 | 0.81328000  | 0.56263600  |
| H | -1.53883700 | -0.61497600 | -0.86669200 |
| H | -2.16207200 | 1.08924900  | 1.59022800  |
| C | -3.71806300 | 0.00454600  | 0.59463900  |
| C | -4.38680300 | -0.24187200 | 1.79437100  |
| C | -4.24770900 | -0.52971400 | -0.58585600 |
| C | -5.54881400 | -1.01215500 | 1.82121100  |
| H | -3.99009900 | 0.17341500  | 2.71736700  |
| C | -5.40778300 | -1.29732500 | -0.56493300 |
| H | -3.73753300 | -0.35668300 | -1.53151300 |

|   |             |             |             |
|---|-------------|-------------|-------------|
| C | -6.06212400 | -1.54512100 | 0.64159400  |
| H | -6.05218600 | -1.19503900 | 2.76575800  |
| H | -5.79985900 | -1.70694000 | -1.49163100 |
| H | -6.96607200 | -2.14614400 | 0.65943600  |
| H | -0.68149000 | 2.70123400  | 0.57085200  |
| C | 3.10415600  | 2.35475200  | -2.20585500 |
| C | 3.14639200  | 2.99828100  | -0.93863800 |
| C | 4.38637600  | 3.42884000  | -0.42713900 |
| C | 5.52720800  | 3.21134500  | -1.17582200 |
| C | 5.46333600  | 2.56352500  | -2.43161400 |
| C | 4.26348000  | 2.12754400  | -2.96247800 |
| C | 1.01297600  | 2.45960400  | -1.41359500 |
| C | 1.80337600  | 3.04548200  | -0.45234000 |
| H | 4.43889600  | 3.92143900  | 0.53896000  |
| H | 6.49050400  | 3.53836000  | -0.79870600 |
| H | 6.37967700  | 2.40360700  | -2.99038600 |
| H | 4.21652900  | 1.62744900  | -3.92389000 |
| H | 1.46627500  | 3.45544500  | 0.48817400  |
| N | 1.79904300  | 2.04166800  | -2.46426100 |
| H | 1.41821800  | 1.62210000  | -3.30010900 |
| C | -0.45039700 | 2.30728200  | -1.51008000 |
| O | -0.94032000 | 1.85336400  | -2.53424500 |
| C | -1.26411000 | 2.83425600  | -0.34808700 |
| C | -2.62696700 | 2.14910800  | -0.21716000 |
| H | -1.38370900 | 3.91304800  | -0.51584300 |
| H | -2.97884700 | 1.91118700  | -1.22799000 |
| C | -3.66573600 | 3.01196200  | 0.46346300  |
| C | -4.96363000 | 3.09763700  | -0.04614700 |
| C | -3.36827100 | 3.69711200  | 1.64651000  |
| C | -5.93801000 | 3.85478000  | 0.60011100  |

|   |             |            |             |
|---|-------------|------------|-------------|
| H | -5.21056400 | 2.55712000 | -0.95653800 |
| C | -4.33837900 | 4.45588300 | 2.29573300  |
| H | -2.36597900 | 3.63767800 | 2.06483800  |
| C | -5.62788100 | 4.53805400 | 1.77342000  |
| H | -6.94016900 | 3.91144300 | 0.18626800  |
| H | -4.08745400 | 4.98439700 | 3.21028400  |
| H | -6.38533300 | 5.12949100 | 2.27791300  |

M4SR

|   |             |             |             |
|---|-------------|-------------|-------------|
| C | 3.82562700  | -1.86739300 | -1.25310800 |
| C | 2.58359700  | -1.54204500 | -1.80503400 |
| C | 2.24435200  | -0.22369600 | -2.09970700 |
| C | 3.17816300  | 0.77230600  | -1.81700700 |
| C | 4.41572900  | 0.45489900  | -1.25170200 |
| C | 4.74941600  | -0.86804400 | -0.96744500 |
| C | 3.96448000  | -3.35610100 | -1.06729100 |
| C | 2.86840800  | -3.89994200 | -2.00858400 |
| C | 1.77787400  | -2.79654100 | -2.05375300 |
| H | 1.27771100  | -0.00588000 | -2.54607700 |
| H | 2.94792700  | 1.80884700  | -2.04363900 |
| H | 5.12939500  | 1.24580600  | -1.04129200 |
| H | 5.71817700  | -1.11276500 | -0.54161700 |
| H | 3.77462400  | -3.62740100 | -0.02211500 |
| H | 3.27841300  | -3.97987900 | -3.01759600 |
| H | 4.95237900  | -3.74058900 | -1.32950100 |
| H | 1.19712000  | -2.77168500 | -2.97543200 |
| N | 0.81626900  | -3.07930500 | -0.96333700 |
| O | 2.36583000  | -5.18682700 | -1.70964200 |
| C | -0.20938600 | -2.30902300 | -0.54976500 |
| C | 0.80980200  | -4.21271700 | -0.19687600 |

|   |             |             |             |
|---|-------------|-------------|-------------|
| N | -0.77811200 | -2.99189200 | 0.44543500  |
| N | -0.15374200 | -4.18607200 | 0.67762600  |
| C | 1.80402600  | -5.30935400 | -0.42215400 |
| H | 2.56787800  | -5.29303800 | 0.36460300  |
| H | 1.29335100  | -6.27253200 | -0.37931700 |
| C | -1.99320700 | -2.68266400 | 1.15243200  |
| C | -3.20463400 | -2.89586200 | 0.49546500  |
| C | -1.89784400 | -2.21659800 | 2.46580800  |
| C | -4.37147000 | -2.63896000 | 1.21650000  |
| C | -3.09164700 | -1.96343700 | 3.13734800  |
| C | -4.33398100 | -2.17282200 | 2.52992400  |
| H | -5.33166500 | -2.79102900 | 0.73033100  |
| H | -3.05158000 | -1.59465500 | 4.15953700  |
| C | -0.55648600 | -1.97616500 | 3.10579700  |
| H | -0.01806600 | -1.17022100 | 2.59358600  |
| H | 0.06658700  | -2.87399800 | 3.06380800  |
| H | -0.67990200 | -1.68847500 | 4.15107100  |
| C | -5.60411500 | -1.87796700 | 3.28585900  |
| H | -5.65312500 | -0.81988900 | 3.56182600  |
| H | -5.65213000 | -2.45744500 | 4.21227700  |
| H | -6.48612200 | -2.11606700 | 2.68762100  |
| C | -3.24270500 | -3.35675600 | -0.93687700 |
| H | -2.66391500 | -4.27656100 | -1.07107000 |
| H | -2.81713200 | -2.59895500 | -1.60500100 |
| H | -4.27050400 | -3.54961700 | -1.24763100 |
| C | -0.69086700 | -1.05958100 | -1.23690200 |
| O | -0.67951800 | -1.13888800 | -2.51176500 |
| C | -1.05274000 | -0.05854000 | -0.38707400 |
| C | -1.69355000 | 1.21142400  | -0.86528600 |
| H | -0.97887600 | -0.21693700 | 0.68301600  |

|   |             |            |             |
|---|-------------|------------|-------------|
| H | -1.34438700 | 1.41759400 | -1.88759500 |
| C | -3.20992600 | 1.08312700 | -0.91888900 |
| C | -3.93359500 | 1.56635100 | -2.01113700 |
| C | -3.91167500 | 0.52189700 | 0.15158900  |
| C | -5.32496100 | 1.50108500 | -2.03274500 |
| H | -3.39850000 | 2.01160400 | -2.84656700 |
| C | -5.30251400 | 0.45790200 | 0.13623600  |
| H | -3.36081700 | 0.11599100 | 0.99849800  |
| C | -6.01546600 | 0.94992000 | -0.95562800 |
| H | -5.86994800 | 1.88068100 | -2.89196700 |
| H | -5.82856200 | 0.01225900 | 0.97665000  |
| H | -7.09968500 | 0.89788500 | -0.97006200 |
| H | 0.65629800  | 2.29710600 | -0.96776700 |
| C | 4.57970600  | 1.95583200 | 1.77308600  |
| C | 4.56912000  | 3.07450800 | 0.89731000  |
| C | 5.78637200  | 3.71048600 | 0.58405100  |
| C | 6.95424900  | 3.21948200 | 1.13285200  |
| C | 6.94128500  | 2.10164400 | 1.99954700  |
| C | 5.76554700  | 1.45803400 | 2.33318000  |
| C | 2.46916700  | 2.29639100 | 1.11686000  |
| C | 3.21439600  | 3.26893900 | 0.49014600  |
| H | 5.80086800  | 4.56745100 | -0.08224700 |
| H | 7.90129800  | 3.69469000 | 0.89961900  |
| H | 7.87876300  | 1.74203700 | 2.41140300  |
| H | 5.75581600  | 0.59873000 | 2.99526500  |
| H | 2.84074900  | 4.02603700 | -0.18458100 |
| N | 3.29207500  | 1.51852200 | 1.89705200  |
| H | 2.95577600  | 0.74178600 | 2.44711700  |
| C | 1.02683300  | 1.98850600 | 1.08024200  |
| O | 0.55580500  | 1.22648000 | 1.90910900  |

|   |             |            |             |
|---|-------------|------------|-------------|
| C | 0.23134900  | 2.65565900 | -0.01898400 |
| C | -1.28545300 | 2.42217900 | 0.02705400  |
| H | 0.46151900  | 3.72707900 | 0.02686300  |
| H | -1.55620400 | 2.16194000 | 1.05859000  |
| C | -2.06059400 | 3.66360600 | -0.36401400 |
| C | -3.16182500 | 4.07193100 | 0.39128500  |
| C | -1.74209200 | 4.38239000 | -1.52062600 |
| C | -3.92917800 | 5.16763200 | 0.00504900  |
| H | -3.42830500 | 3.51010000 | 1.28279200  |
| C | -2.50580700 | 5.47990800 | -1.91142000 |
| H | -0.89255200 | 4.07724000 | -2.12807900 |
| C | -3.60338200 | 5.87568100 | -1.14939100 |
| H | -4.78317800 | 5.46708700 | 0.60469800  |
| H | -2.24460700 | 6.02567100 | -2.81286300 |
| H | -4.19964900 | 6.73003600 | -1.45352700 |

M4SS

|   |             |             |             |
|---|-------------|-------------|-------------|
| C | -4.19236100 | 0.86082000  | 1.84422300  |
| C | -2.91950100 | 0.57062800  | 1.36564700  |
| C | -1.97671000 | -0.08652200 | 2.15134500  |
| C | -2.34223700 | -0.48895900 | 3.43277200  |
| C | -3.63072400 | -0.22819100 | 3.91062800  |
| C | -4.55910300 | 0.45222100  | 3.12619900  |
| C | -5.00241300 | 1.62942800  | 0.83293700  |
| C | -4.04257500 | 1.88381400  | -0.35593800 |
| C | -2.73371700 | 1.06902000  | -0.04652800 |
| H | -0.97499200 | -0.27032800 | 1.76539800  |
| H | -1.62609700 | -1.00698500 | 4.06270800  |
| H | -3.90591200 | -0.54927300 | 4.91009400  |
| H | -5.55102200 | 0.66855200  | 3.51194400  |



|   |             |            |             |
|---|-------------|------------|-------------|
| H | -5.37021000 | 2.58268800 | 1.22805600  |
| H | -4.47189100 | 1.53061800 | -1.29469600 |
| H | -5.87381100 | 1.05878100 | 0.50109100  |
| H | -2.55389300 | 0.26243400 | -0.76396900 |
| N | -1.56114500 | 1.94446500 | -0.12099500 |
| O | -3.79866900 | 3.26903100 | -0.57093900 |
| C | -0.27506200 | 1.60604000 | -0.30324000 |
| C | -1.60100800 | 3.26694200 | 0.21081300  |
| N | 0.41042100  | 2.73116000 | -0.08613000 |
| N | -0.40698000 | 3.78540400 | 0.23006700  |
| C | -2.95648700 | 3.87006800 | 0.39471100  |
| H | -3.31796100 | 3.69680600 | 1.41807200  |
| H | -2.92946000 | 4.94256300 | 0.20420900  |
| C | 1.83041800  | 2.91856900 | -0.21498700 |
| C | 2.58567900  | 3.04090400 | 0.95126100  |
| C | 2.38237000  | 2.94145100 | -1.49797400 |
| C | 3.96312700  | 3.20890900 | 0.80456000  |
| C | 3.76242700  | 3.10488000 | -1.58984700 |
| C | 4.56457500  | 3.24482100 | -0.45469500 |
| H | 4.57839700  | 3.30202400 | 1.69595400  |
| H | 4.22395400  | 3.11980300 | -2.57404800 |
| C | 1.51853700  | 2.78025700 | -2.72014400 |
| H | 0.67955200  | 3.48318900 | -2.70224300 |
| H | 1.09897500  | 1.76990500 | -2.78063200 |
| H | 2.10082000  | 2.96362100 | -3.62421500 |
| C | 6.05083800  | 3.44660700 | -0.59575800 |
| H | 6.27931200  | 4.49751300 | -0.80049500 |
| H | 6.44823100  | 2.85551600 | -1.42474000 |
| H | 6.57795800  | 3.16300600 | 0.31801200  |
| C | 1.93253200  | 2.96200000 | 2.30564300  |

|   |             |             |             |
|---|-------------|-------------|-------------|
| H | 1.36391500  | 2.03043300  | 2.41160900  |
| H | 1.23171500  | 3.78819700  | 2.45571400  |
| H | 2.68349000  | 2.99547500  | 3.09602100  |
| C | 0.19622000  | 0.27313100  | -0.81886600 |
| O | -0.53845800 | -0.19252200 | -1.75360300 |
| C | 1.33843900  | -0.22031300 | -0.25838800 |
| C | 1.95098600  | -1.46050300 | -0.83493700 |
| H | 1.81037700  | 0.31487200  | 0.55811100  |
| H | 1.47506800  | -1.59963900 | -1.81293400 |
| C | 3.44961800  | -1.36362800 | -1.07605800 |
| C | 4.06601000  | -2.32296100 | -1.88972400 |
| C | 4.24846000  | -0.36118500 | -0.52309400 |
| C | 5.43574400  | -2.29390300 | -2.13010300 |
| H | 3.45535100  | -3.09853600 | -2.34798500 |
| C | 5.62238400  | -0.32617400 | -0.76192900 |
| H | 3.80175200  | 0.41902700  | 0.08534400  |
| C | 6.22362000  | -1.29349400 | -1.56127100 |
| H | 5.88817500  | -3.04703100 | -2.76831100 |
| H | 6.22041900  | 0.46500700  | -0.31736200 |
| H | 7.29264500  | -1.26605100 | -1.74747700 |
| H | -0.31926200 | -2.07570900 | 0.70101200  |
| C | -4.01097300 | -1.93510400 | -2.07687200 |
| C | -4.19683700 | -1.99021100 | -0.66850800 |
| C | -5.44231200 | -1.62215200 | -0.12791700 |
| C | -6.44592800 | -1.20752700 | -0.98483000 |
| C | -6.23607700 | -1.14910800 | -2.38077300 |
| C | -5.02603500 | -1.51007600 | -2.94537600 |
| C | -2.08725400 | -2.60112300 | -1.15385300 |
| C | -2.95371300 | -2.41812600 | -0.10351800 |
| H | -5.60148100 | -1.65302500 | 0.94675200  |

|   |             |             |             |
|---|-------------|-------------|-------------|
| H | -7.41212600 | -0.91804300 | -0.58329100 |
| H | -7.04407300 | -0.81579200 | -3.02402300 |
| H | -4.86438400 | -1.46706600 | -4.01727700 |
| H | -2.73173200 | -2.56141600 | 0.94448200  |
| N | -2.73284500 | -2.34469600 | -2.33853800 |
| H | -2.24940600 | -2.31324400 | -3.22404600 |
| C | -0.66101400 | -2.98461800 | -1.18567600 |
| O | -0.15160600 | -3.35934100 | -2.22805600 |
| C | 0.09090800  | -2.91058500 | 0.12693100  |
| C | 1.60523600  | -2.76610000 | -0.03988000 |
| H | -0.14087700 | -3.82510000 | 0.69035400  |
| H | 1.95011400  | -3.60815600 | -0.65106400 |
| C | 2.33295200  | -2.82929900 | 1.28626900  |
| C | 3.49868700  | -3.59339100 | 1.40288600  |
| C | 1.90298100  | -2.10855600 | 2.40636100  |
| C | 4.21314000  | -3.64202300 | 2.59673100  |
| H | 3.85014200  | -4.15251500 | 0.53928100  |
| C | 2.61489800  | -2.15302300 | 3.60342800  |
| H | 1.00274100  | -1.50323800 | 2.34664100  |
| C | 3.77254400  | -2.92054400 | 3.70383900  |
| H | 5.11384500  | -4.24477200 | 2.66123700  |
| H | 2.26213500  | -1.58716900 | 4.46057200  |
| H | 4.32549900  | -2.95730500 | 4.63709200  |

TS5RR

|   |             |             |             |
|---|-------------|-------------|-------------|
| C | -4.38158200 | -2.76310200 | -0.16152200 |
| C | -3.32170400 | -2.27145800 | -0.93037500 |
| C | -2.67225900 | -3.07870900 | -1.85738200 |
| C | -3.05275300 | -4.41603700 | -1.95171500 |
| C | -4.07511000 | -4.92361100 | -1.14750400 |

|   |             |             |             |
|---|-------------|-------------|-------------|
| C | -4.75845200 | -4.09768800 | -0.25620900 |
| C | -5.02760000 | -1.65316600 | 0.62427900  |
| C | -4.57372400 | -0.41554000 | -0.18219000 |
| C | -3.16359900 | -0.78151800 | -0.71743400 |
| H | -1.88655300 | -2.66542100 | -2.47732100 |
| H | -2.55761200 | -5.06639700 | -2.66534000 |
| H | -4.35944400 | -5.96751500 | -1.23679300 |
| H | -5.58374000 | -4.48313200 | 0.33478800  |
| H | -4.65136700 | -1.62775200 | 1.65442300  |
| H | -5.22027600 | -0.31321700 | -1.05718900 |
| H | -6.11571900 | -1.72973000 | 0.67439500  |
| H | -2.84006900 | -0.25024300 | -1.61290200 |
| N | -2.19700400 | -0.41412000 | 0.36539600  |
| O | -4.63775500 | 0.82111600  | 0.48250800  |
| C | -0.88327400 | -0.67949400 | 0.48035200  |
| C | -2.54917500 | 0.26458200  | 1.50750400  |
| N | -0.52182300 | -0.25876600 | 1.68860600  |
| N | -1.55347900 | 0.33694300  | 2.34692300  |
| C | -3.90357000 | 0.88407400  | 1.68204800  |
| H | -4.43231000 | 0.40283500  | 2.51391100  |
| H | -3.76795500 | 1.94533300  | 1.91452300  |
| C | 0.71993100  | -0.59621800 | 2.33950700  |
| C | 0.98649300  | -1.96408100 | 2.51654800  |
| C | 1.59203100  | 0.40753700  | 2.76841600  |
| C | 2.20580400  | -2.30858200 | 3.09369300  |
| C | 2.79497700  | 0.00173300  | 3.34932000  |
| C | 3.12378700  | -1.34256100 | 3.51048400  |
| H | 2.43741300  | -3.36106600 | 3.23497400  |
| H | 3.49205200  | 0.76667000  | 3.68313100  |
| C | 1.31226100  | 1.87859700  | 2.61164400  |

|   |             |             |             |
|---|-------------|-------------|-------------|
| H | 0.25632100  | 2.08573600  | 2.43775100  |
| H | 1.89616900  | 2.28416400  | 1.77613100  |
| H | 1.62482600  | 2.41162800  | 3.51251100  |
| C | 4.41883700  | -1.74578200 | 4.16549700  |
| H | 5.19988300  | -1.00370900 | 3.98490100  |
| H | 4.76382800  | -2.71401100 | 3.79505700  |
| H | 4.28843500  | -1.83370700 | 5.24893300  |
| C | -0.00705800 | -3.03445800 | 2.13698700  |
| H | -0.03655700 | -3.20255800 | 1.05596500  |
| H | -1.01815500 | -2.76733900 | 2.46137700  |
| H | 0.26404500  | -3.97528800 | 2.61786800  |
| C | 0.08257800  | -1.14091100 | -0.59854400 |
| O | -0.09152400 | -2.23399400 | -1.13363900 |
| C | 0.97153000  | -0.11869000 | -1.00261700 |
| C | 2.01887600  | -0.47757900 | -2.01430000 |
| H | 1.23341000  | 0.63087300  | -0.25799900 |
| H | 1.51216300  | -1.09142300 | -2.77157200 |
| C | 3.20793500  | -1.26301000 | -1.50566800 |
| C | 3.98697500  | -1.98677700 | -2.41474200 |
| C | 3.58389500  | -1.26120200 | -0.16050700 |
| C | 5.12323600  | -2.67376400 | -1.99819500 |
| H | 3.69716600  | -2.00437600 | -3.46340800 |
| C | 4.71930200  | -1.95026200 | 0.26153200  |
| H | 2.98853500  | -0.71555900 | 0.56772400  |
| C | 5.49600600  | -2.65444200 | -0.65457700 |
| H | 5.71488200  | -3.22914200 | -2.71960300 |
| H | 4.99512900  | -1.93309400 | 1.31242300  |
| H | 6.38031900  | -3.19136900 | -0.32587500 |
| H | 0.99266800  | 2.52699300  | -3.14211800 |
| C | -2.73246900 | 3.02484200  | -0.72012200 |

|   |             |            |             |
|---|-------------|------------|-------------|
| C | -1.70713300 | 3.28118000 | 0.22459600  |
| C | -1.98453700 | 4.10929700 | 1.32790400  |
| C | -3.24987700 | 4.65625000 | 1.45143700  |
| C | -4.25249100 | 4.39805900 | 0.49083500  |
| C | -4.00908900 | 3.58686000 | -0.60377800 |
| C | -0.89664000 | 1.87781400 | -1.36010100 |
| C | -0.55439900 | 2.54921400 | -0.20974200 |
| H | -1.21535000 | 4.31669400 | 2.06654700  |
| H | -3.47975200 | 5.29711900 | 2.29668200  |
| H | -5.23427900 | 4.84328300 | 0.61562200  |
| H | -4.78333900 | 3.37559000 | -1.33378400 |
| H | 0.40047400  | 2.51509100 | 0.28487800  |
| N | -2.20774800 | 2.17429400 | -1.66114300 |
| H | -2.66735400 | 1.78630100 | -2.47263200 |
| C | -0.20372400 | 0.89134700 | -2.28985800 |
| O | -0.99970000 | 0.10748900 | -2.89490000 |
| C | 0.99999000  | 1.43317400 | -3.12974900 |
| C | 2.37366400  | 0.86481900 | -2.72157500 |
| H | 0.76982300  | 1.09375800 | -4.14286100 |
| H | 2.95480700  | 0.63481800 | -3.62242900 |
| C | 3.23797500  | 1.76827800 | -1.85723000 |
| C | 4.60540700  | 1.48651100 | -1.72446400 |
| C | 2.73345100  | 2.87557100 | -1.17179800 |
| C | 5.42780500  | 2.26498600 | -0.91708500 |
| H | 5.02792500  | 0.63921600 | -2.25827700 |
| C | 3.55262000  | 3.65793300 | -0.35579800 |
| H | 1.68950800  | 3.14675600 | -1.27961200 |
| C | 4.90272200  | 3.35270500 | -0.22033700 |
| H | 6.48299800  | 2.02328100 | -0.83387900 |
| H | 3.12913800  | 4.51248400 | 0.16417100  |

|   |            |            |            |
|---|------------|------------|------------|
| H | 5.54291100 | 3.96178900 | 0.40989400 |
|---|------------|------------|------------|

TS5RS

|   |             |             |             |
|---|-------------|-------------|-------------|
| C | -0.05456400 | -0.04470000 | 0.51659300  |
| O | 0.28835300  | 0.35129400  | 1.62509900  |
| C | -1.23638500 | 0.31873100  | -0.22499500 |
| C | -2.38001900 | 0.87830200  | 0.60258600  |
| H | -1.56882200 | -0.46545600 | -0.90281100 |
| H | -1.95256800 | 1.54056000  | 1.36673400  |
| C | -3.16172800 | -0.20801000 | 1.30170700  |
| C | -3.07629000 | -0.35389900 | 2.68918900  |
| C | -3.92627000 | -1.12893500 | 0.57804600  |
| C | -3.73880500 | -1.39243700 | 3.34108600  |
| H | -2.47427300 | 0.35013900  | 3.25807600  |
| C | -4.59366600 | -2.16404400 | 1.22672800  |
| H | -3.98925400 | -1.04901500 | -0.50538800 |
| C | -4.50117000 | -2.30101800 | 2.61107100  |
| H | -3.65914100 | -1.49067300 | 4.41940800  |
| H | -5.18240800 | -2.86930600 | 0.64684200  |
| H | -5.01956000 | -3.10965500 | 3.11638700  |
| H | -1.65424400 | 3.30636100  | -0.34728300 |
| C | 2.59216800  | 2.54223900  | -1.87839300 |
| C | 2.40262300  | 3.17548600  | -0.61758700 |
| C | 3.47605500  | 3.88302500  | -0.04771100 |
| C | 4.67553300  | 3.95976800  | -0.73800500 |
| C | 4.83576500  | 3.33612500  | -1.99329600 |
| C | 3.80216400  | 2.61946000  | -2.57678800 |
| C | 0.48140700  | 2.15021300  | -1.21538700 |
| C | 1.05048500  | 2.90508900  | -0.21556000 |
| H | 3.36130500  | 4.36748600  | 0.91762000  |

|   |             |             |             |
|---|-------------|-------------|-------------|
| H | 5.50842000  | 4.50750200  | -0.30838500 |
| H | 5.78759600  | 3.41437700  | -2.50863200 |
| H | 3.92549800  | 2.13099200  | -3.53790500 |
| H | 0.56464900  | 3.23233900  | 0.69336100  |
| N | 1.41285700  | 1.91777800  | -2.19362400 |
| H | 1.11929800  | 1.45989900  | -3.04806700 |
| C | -0.90033700 | 1.56362700  | -1.47253400 |
| O | -1.00660900 | 1.03330800  | -2.65201000 |
| C | -2.03023600 | 2.55937800  | -1.05670800 |
| C | -3.15309000 | 1.75464300  | -0.39986500 |
| H | -2.35311100 | 3.07640700  | -1.96366000 |
| H | -3.58908200 | 1.10357700  | -1.16902400 |
| C | -4.25802000 | 2.56935500  | 0.22690600  |
| C | -5.57647500 | 2.43264900  | -0.21215500 |
| C | -3.99384000 | 3.46644600  | 1.26832700  |
| C | -6.60622400 | 3.17391200  | 0.36444800  |
| H | -5.79574600 | 1.73440900  | -1.01613800 |
| C | -5.01833200 | 4.20765600  | 1.84855600  |
| H | -2.97597300 | 3.58918900  | 1.63083200  |
| C | -6.32992900 | 4.06461300  | 1.39765400  |
| H | -7.62387000 | 3.05288200  | 0.00621200  |
| H | -4.79366700 | 4.89853500  | 2.65537200  |
| H | -7.12914300 | 4.64253800  | 1.85074900  |
| C | 4.89521700  | -0.60462800 | 2.19267800  |
| C | 3.51477200  | -0.64168400 | 2.01041200  |
| C | 2.68043400  | -1.29683200 | 2.91202400  |
| C | 3.25795000  | -1.92556700 | 4.01208000  |
| C | 4.64171700  | -1.88976700 | 4.20329800  |
| C | 5.46833400  | -1.22826000 | 3.29843300  |
| C | 5.57443300  | 0.16455300  | 1.09021100  |



|   |             |             |             |
|---|-------------|-------------|-------------|
| C | 4.48113900  | 0.41073200  | 0.02592100  |
| C | 3.11784600  | 0.09106200  | 0.74642300  |
| H | 1.60531900  | -1.30303300 | 2.76229500  |
| H | 2.62859600  | -2.44462700 | 4.72740900  |
| H | 5.07722100  | -2.38427400 | 5.06568300  |
| H | 6.54346700  | -1.20520500 | 3.44834700  |
| H | 6.41960000  | -0.37039600 | 0.64592900  |
| H | 4.47885000  | 1.44206300  | -0.31960800 |
| H | 5.95627900  | 1.12208300  | 1.45912500  |
| H | 2.54471400  | 1.00110600  | 0.93540800  |
| N | 2.28746100  | -0.77517400 | -0.10658500 |
| O | 4.69085500  | -0.35323700 | -1.15480400 |
| C | 0.95623600  | -0.90772400 | -0.21292000 |
| C | 2.84912400  | -1.73825700 | -0.89269700 |
| N | 0.75982200  | -1.94384400 | -1.02979400 |
| N | 1.93734100  | -2.47068000 | -1.46635600 |
| C | 4.33483000  | -1.71671300 | -1.04419800 |
| H | 4.82009700  | -2.20699900 | -0.18911100 |
| H | 4.62810400  | -2.22560700 | -1.96209900 |
| C | -0.47706800 | -2.59838700 | -1.38103300 |
| C | -1.21292900 | -3.22731700 | -0.37513700 |
| C | -0.86177200 | -2.57951500 | -2.72848500 |
| C | -2.38592900 | -3.87734000 | -0.76438800 |
| C | -2.04439400 | -3.23567900 | -3.05349800 |
| C | -2.81597400 | -3.89103500 | -2.08839700 |
| H | -2.97906000 | -4.37432400 | -0.00156600 |
| H | -2.37730200 | -3.22868300 | -4.08839100 |
| C | -0.06681100 | -1.81843000 | -3.75257300 |
| H | 0.95383600  | -2.20007500 | -3.83338700 |
| H | -0.04091700 | -0.76134800 | -3.45558700 |

|   |             |             |             |
|---|-------------|-------------|-------------|
| H | -0.54549400 | -1.89518300 | -4.73025400 |
| C | -4.08922800 | -4.59210200 | -2.48276600 |
| H | -3.87967600 | -5.42699800 | -3.15812000 |
| H | -4.76152700 | -3.90850800 | -3.00896600 |
| H | -4.61217800 | -4.98448400 | -1.60830000 |
| C | -0.82043500 | -3.18222300 | 1.07804600  |
| H | -1.17547400 | -2.25323700 | 1.54319800  |
| H | 0.26262100  | -3.24870500 | 1.22140700  |
| H | -1.28600500 | -4.00951700 | 1.61641100  |

TS5SR

|   |            |             |             |
|---|------------|-------------|-------------|
| C | 5.30992000 | -0.26559800 | 0.00731900  |
| C | 3.97679700 | -0.38454500 | 0.39221100  |
| C | 3.60439100 | -0.48745300 | 1.72786700  |
| C | 4.60697600 | -0.41350300 | 2.69479300  |
| C | 5.94435000 | -0.25943300 | 2.31983800  |
| C | 6.30730900 | -0.19287300 | 0.97466100  |
| C | 5.42286700 | -0.25872800 | -1.49773700 |
| C | 4.08353400 | -0.85761600 | -1.96397400 |
| C | 3.08841100 | -0.45040500 | -0.83599600 |
| H | 2.55543500 | -0.59125000 | 2.01026400  |
| H | 4.34673200 | -0.48183000 | 3.74585400  |
| H | 6.71189500 | -0.20793900 | 3.08541600  |
| H | 7.35058100 | -0.10110900 | 0.68841500  |
| H | 6.26327000 | -0.83987000 | -1.88450400 |
| H | 3.76283000 | -0.47464300 | -2.93337000 |
| H | 5.51603100 | 0.76888000  | -1.87009700 |
| H | 2.58354900 | 0.49556900  | -1.05760900 |
| N | 2.07785500 | -1.48929400 | -0.67540700 |
| O | 4.15583200 | -2.27406100 | -2.13492000 |

|   |             |             |             |
|---|-------------|-------------|-------------|
| C | 0.76564700  | -1.43839500 | -0.40915300 |
| C | 2.46663700  | -2.79549800 | -0.59901100 |
| N | 0.41407400  | -2.69758200 | -0.15422400 |
| N | 1.46317400  | -3.56410600 | -0.28265900 |
| C | 3.87463600  | -3.09526600 | -1.01240100 |
| H | 4.57053300  | -2.92636600 | -0.18267300 |
| H | 3.95117900  | -4.13194300 | -1.34027400 |
| C | -0.88954200 | -3.20457300 | 0.18958800  |
| C | -1.73485400 | -3.60831500 | -0.84207400 |
| C | -1.21013900 | -3.30159800 | 1.54736300  |
| C | -2.96085600 | -4.16128200 | -0.47294200 |
| C | -2.45811200 | -3.83609500 | 1.85921400  |
| C | -3.33894800 | -4.27529600 | 0.86474000  |
| H | -3.64196700 | -4.49211400 | -1.25275100 |
| H | -2.74623100 | -3.92165300 | 2.90394600  |
| C | -0.25043400 | -2.82477900 | 2.60478800  |
| H | -0.10445200 | -1.73494000 | 2.55904200  |
| H | 0.73106800  | -3.29352800 | 2.47908600  |
| H | -0.62562200 | -3.07871000 | 3.59741800  |
| C | -4.68773400 | -4.83116000 | 1.24003400  |
| H | -5.16410600 | -5.32317500 | 0.38975100  |
| H | -5.35012600 | -4.02888900 | 1.58153300  |
| H | -4.60268200 | -5.55354000 | 2.05583800  |
| C | -1.35353600 | -3.40738600 | -2.28336100 |
| H | -1.34528700 | -2.33885100 | -2.52880800 |
| H | -2.07177500 | -3.89714200 | -2.94199000 |
| H | -0.35773500 | -3.80704100 | -2.49574500 |
| C | -0.13658300 | -0.24730000 | -0.70175000 |
| O | 0.13305000  | 0.31350300  | -1.76552300 |
| C | -1.09445400 | 0.12117700  | 0.27648000  |

|   |             |             |             |
|---|-------------|-------------|-------------|
| C | -2.23785100 | 1.01119400  | -0.13739600 |
| H | -1.35123000 | -0.66190700 | 0.98749100  |
| H | -1.83621200 | 1.80668800  | -0.77559000 |
| C | -3.35680400 | 0.32707300  | -0.89393000 |
| C | -3.96803400 | 0.95994700  | -1.97939400 |
| C | -3.84790900 | -0.91532400 | -0.48121400 |
| C | -5.04277200 | 0.36791900  | -2.63927800 |
| H | -3.59955300 | 1.93048500  | -2.30265700 |
| C | -4.92422400 | -1.50803200 | -1.13560500 |
| H | -3.38323400 | -1.43076600 | 0.35774300  |
| C | -5.52591900 | -0.86861600 | -2.21783200 |
| H | -5.50390700 | 0.87370800  | -3.48196200 |
| H | -5.29098100 | -2.47394000 | -0.79927400 |
| H | -6.36400000 | -1.33167100 | -2.72892700 |
| H | -1.29553400 | 3.06898300  | 1.97047200  |
| C | 2.82054900  | 2.79563400  | 0.26257000  |
| C | 1.94005000  | 3.40353500  | -0.67169700 |
| C | 2.48611700  | 4.22788300  | -1.67145400 |
| C | 3.85748400  | 4.41544400  | -1.71435300 |
| C | 4.71112200  | 3.79936200  | -0.77518500 |
| C | 4.20733000  | 2.98414600  | 0.22630000  |
| C | 0.72845000  | 2.11083700  | 0.73531900  |
| C | 0.61339000  | 2.96463900  | -0.33940400 |
| H | 1.83995700  | 4.70448800  | -2.40288200 |
| H | 4.28842900  | 5.04758800  | -2.48438300 |
| H | 5.78166200  | 3.96799800  | -0.83764700 |
| H | 4.85606000  | 2.50098000  | 0.95210800  |
| H | -0.28956100 | 3.22153000  | -0.87275400 |
| N | 2.05089900  | 2.02470300  | 1.08941100  |
| H | 2.32217700  | 1.49707200  | 1.90676300  |

|   |             |            |             |
|---|-------------|------------|-------------|
| C | -0.19919800 | 1.24094400 | 1.56689700  |
| O | 0.40742100  | 0.51475600 | 2.42982700  |
| C | -1.49278100 | 1.99378900 | 2.01461000  |
| C | -2.74159400 | 1.63289200 | 1.18863700  |
| H | -1.63779800 | 1.72931200 | 3.06467200  |
| H | -3.28070400 | 0.83236700 | 1.71142200  |
| C | -3.71273100 | 2.76485300 | 0.94664700  |
| C | -5.08134200 | 2.58477700 | 1.15611400  |
| C | -3.27307400 | 3.99304100 | 0.43978600  |
| C | -5.98947900 | 3.60470300 | 0.87822200  |
| H | -5.43821600 | 1.63010500 | 1.53462400  |
| C | -4.17548200 | 5.01419800 | 0.15907800  |
| H | -2.21128500 | 4.15296400 | 0.26375400  |
| C | -5.53902000 | 4.82409300 | 0.38017700  |
| H | -7.04931700 | 3.44480500 | 1.05080500  |
| H | -3.81395800 | 5.96056000 | -0.23116400 |
| H | -6.24372900 | 5.62103100 | 0.16505600  |

TS5SS

|   |             |             |            |
|---|-------------|-------------|------------|
| C | -2.16346000 | -0.48849400 | 3.90499200 |
| C | -1.71195000 | -0.85907700 | 2.64190500 |
| C | -1.90788000 | -2.14276500 | 2.13931700 |
| C | -2.57331000 | -3.06900100 | 2.93721100 |
| C | -3.02706300 | -2.70682000 | 4.20923400 |
| C | -2.82894000 | -1.41867100 | 4.70047900 |
| C | -1.84930100 | 0.95440300  | 4.20546600 |
| C | -0.96691400 | 1.44212900  | 3.03002600 |
| C | -1.02149100 | 0.29322400  | 1.95211900 |
| H | -1.56141600 | -2.41694700 | 1.14466500 |
| H | -2.74040700 | -4.07555700 | 2.56903100 |

|   |             |             |             |
|---|-------------|-------------|-------------|
| H | -3.54115100 | -3.44062900 | 4.82141200  |
| H | -3.18452500 | -1.14481900 | 5.68895200  |
| H | -1.32189900 | 1.09079300  | 5.15508900  |
| H | -1.35749800 | 2.36221600  | 2.59367400  |
| H | -2.76440400 | 1.55095100  | 4.26139900  |
| H | -1.57128500 | 0.63335200  | 1.07571700  |
| N | 0.33871600  | -0.09901900 | 1.53826000  |
| O | 0.35197400  | 1.77316300  | 3.42468400  |
| C | 0.79318700  | -0.74650700 | 0.44414800  |
| C | 1.36025700  | -0.08856900 | 2.44689300  |
| N | 2.03255800  | -1.12755600 | 0.74817100  |
| N | 2.40891300  | -0.70524400 | 1.98772000  |
| C | 1.15537800  | 0.65016300  | 3.72893300  |
| H | 0.68631700  | 0.00090800  | 4.48072400  |
| H | 2.11080600  | 1.00757300  | 4.11174600  |
| C | 2.94232200  | -1.98326300 | 0.02094700  |
| C | 2.82555900  | -3.36011700 | 0.23137600  |
| C | 3.92198500  | -1.40247500 | -0.77604300 |
| C | 3.77030500  | -4.17536800 | -0.38122700 |
| C | 4.84733100  | -2.26514900 | -1.36828400 |
| C | 4.79070300  | -3.64387100 | -1.17754500 |
| H | 3.70935500  | -5.25130700 | -0.23730200 |
| H | 5.62657500  | -1.84228200 | -1.99706400 |
| C | 3.91352300  | 0.07108900  | -1.05617000 |
| H | 3.69011700  | 0.66359400  | -0.16271000 |
| H | 3.13014000  | 0.27619500  | -1.79644100 |
| H | 4.87391700  | 0.39972600  | -1.45880000 |
| C | 5.79117300  | -4.55922300 | -1.83421900 |
| H | 6.19707700  | -5.27616300 | -1.11559000 |
| H | 6.62037800  | -3.99563100 | -2.26610600 |

|   |             |             |             |
|---|-------------|-------------|-------------|
| H | 5.31821900  | -5.13304800 | -2.63715000 |
| C | 1.68923800  | -3.92232900 | 1.04009800  |
| H | 0.74980700  | -3.76875100 | 0.49731800  |
| H | 1.59892700  | -3.43339700 | 2.01541500  |
| H | 1.82238900  | -4.99258700 | 1.20325600  |
| C | 0.12327700  | -0.99153400 | -0.89666600 |
| O | 0.46192800  | -2.01409900 | -1.49363800 |
| C | -0.70808800 | 0.04659700  | -1.38199100 |
| C | -1.64052600 | -0.26131700 | -2.52109200 |
| H | -1.08490700 | 0.75031000  | -0.65168500 |
| H | -1.02531900 | -0.70834000 | -3.31300300 |
| C | -2.78311400 | -1.20730700 | -2.22754000 |
| C | -3.31749800 | -1.97968800 | -3.26285300 |
| C | -3.35805900 | -1.31386700 | -0.95874900 |
| C | -4.39427100 | -2.83386900 | -3.03914900 |
| H | -2.87782500 | -1.90948300 | -4.25526000 |
| C | -4.42785600 | -2.17383400 | -0.72447500 |
| H | -2.96758800 | -0.71214500 | -0.14178000 |
| C | -4.95172100 | -2.93634700 | -1.76588900 |
| H | -4.79183900 | -3.42727900 | -3.85681500 |
| H | -4.84928700 | -2.24756900 | 0.27385700  |
| H | -5.78448200 | -3.60887600 | -1.58634200 |
| H | -0.82374100 | 2.94431200  | -2.96924000 |
| C | 2.90322000  | 3.36865700  | -0.82205400 |
| C | 2.01736400  | 3.29903400  | 0.28281600  |
| C | 2.37174300  | 3.93589500  | 1.48412300  |
| C | 3.57593200  | 4.61704500  | 1.54817700  |
| C | 4.44154200  | 4.67579400  | 0.43652300  |
| C | 4.12101300  | 4.05465100  | -0.75955700 |
| C | 1.13884900  | 2.10423300  | -1.43157700 |

|   |             |            |             |
|---|-------------|------------|-------------|
| C | 0.89996200  | 2.50118200 | -0.13584500 |
| H | 1.71332500  | 3.87580900 | 2.34613200  |
| H | 3.86511800  | 5.11275100 | 2.46952100  |
| H | 5.37987000  | 5.21465300 | 0.52119500  |
| H | 4.78705100  | 4.09367800 | -1.61557300 |
| H | 0.03330200  | 2.26825200 | 0.46433300  |
| N | 2.32914500  | 2.65652300 | -1.84455300 |
| H | 2.75388000  | 2.39053900 | -2.72177400 |
| C | 0.45472800  | 1.22031100 | -2.46630900 |
| O | 1.25159300  | 0.53384000 | -3.17245100 |
| C | -0.73922300 | 1.88610800 | -3.23339100 |
| C | -2.07422500 | 1.14034400 | -3.04609700 |
| H | -0.43630500 | 1.83122700 | -4.28175900 |
| H | -2.57502800 | 1.00978600 | -4.01157800 |
| C | -3.06231200 | 1.81224300 | -2.11026500 |
| C | -4.42594400 | 1.51811800 | -2.22954500 |
| C | -2.66765400 | 2.68380300 | -1.08926800 |
| C | -5.36062400 | 2.05987900 | -1.35240200 |
| H | -4.75374500 | 0.84283600 | -3.01646800 |
| C | -3.59905400 | 3.22324100 | -0.20165000 |
| H | -1.62144200 | 2.95945200 | -0.98523800 |
| C | -4.94951800 | 2.91160500 | -0.32858200 |
| H | -6.41215700 | 1.81629200 | -1.46868100 |
| H | -3.26454200 | 3.89756100 | 0.58136600  |
| H | -5.67659300 | 3.33417900 | 0.35749900  |

M5RR

|   |             |             |             |
|---|-------------|-------------|-------------|
| C | -4.08155900 | -2.81976800 | -0.71131500 |
| C | -3.08493900 | -2.09144700 | -1.36923400 |
| C | -2.24228200 | -2.67653600 | -2.30558800 |



|   |             |             |             |
|---|-------------|-------------|-------------|
| C | -2.38961400 | -4.04155000 | -2.55160000 |
| C | -3.36504500 | -4.78316700 | -1.88141600 |
| C | -4.22517500 | -4.17893700 | -0.96299200 |
| C | -4.89614600 | -1.91752200 | 0.18444700  |
| C | -4.58254000 | -0.52594000 | -0.41361900 |
| C | -3.14191300 | -0.64375900 | -0.95772300 |
| H | -1.49796200 | -2.06551400 | -2.80828600 |
| H | -1.74641000 | -4.53149300 | -3.27530200 |
| H | -3.46649700 | -5.84382000 | -2.08937700 |
| H | -4.99781600 | -4.75766200 | -0.46597900 |
| H | -4.55527500 | -1.99373200 | 1.22522900  |
| H | -5.23151700 | -0.36090800 | -1.27702000 |
| H | -5.96553900 | -2.13768000 | 0.17410300  |
| H | -2.84414500 | 0.04079500  | -1.74863700 |
| N | -2.23510300 | -0.38056900 | 0.19900000  |
| O | -4.78075300 | 0.59167800  | 0.42117000  |
| C | -0.94013900 | -0.68643700 | 0.34722600  |
| C | -2.66271400 | 0.07277100  | 1.42169800  |
| N | -0.64634100 | -0.48338200 | 1.62793000  |
| N | -1.71695300 | -0.00712000 | 2.31890900  |
| C | -4.05813600 | 0.58026500  | 1.62980300  |
| H | -4.55345100 | -0.02645600 | 2.39857600  |
| H | -4.00345300 | 1.61795600  | 1.97604900  |
| C | 0.53852100  | -1.00445000 | 2.26815400  |
| C | 0.65019400  | -2.40590700 | 2.30260200  |
| C | 1.50055500  | -0.15190200 | 2.80948300  |
| C | 1.81947100  | -2.93861200 | 2.83207000  |
| C | 2.65108500  | -0.74419000 | 3.33748100  |
| C | 2.83922800  | -2.12351800 | 3.33362200  |
| H | 1.93622900  | -4.01879300 | 2.86342100  |

|   |             |             |             |
|---|-------------|-------------|-------------|
| H | 3.41962900  | -0.09861100 | 3.75546700  |
| C | 1.35478500  | 1.34524200  | 2.83095800  |
| H | 0.30949900  | 1.65248500  | 2.77776400  |
| H | 1.89945500  | 1.80006200  | 1.99300700  |
| H | 1.78751400  | 1.74569600  | 3.75014600  |
| C | 4.10513300  | -2.74013400 | 3.86621000  |
| H | 4.77305300  | -1.98261100 | 4.28065500  |
| H | 4.63651800  | -3.26500300 | 3.06614200  |
| H | 3.88497200  | -3.47278000 | 4.64749100  |
| C | -0.46420900 | -3.30348400 | 1.82382100  |
| H | -0.52127300 | -3.33157200 | 0.73083000  |
| H | -1.43306600 | -2.96597400 | 2.20714200  |
| H | -0.29730800 | -4.32135200 | 2.17853800  |
| C | 0.15278800  | -0.99599500 | -0.68174700 |
| O | 0.35530500  | -2.12400700 | -1.04937600 |
| C | 0.92474900  | 0.22639900  | -1.06501100 |
| C | 2.06024700  | -0.07142200 | -2.03069500 |
| H | 1.27621100  | 0.73442000  | -0.15520800 |
| H | 1.61429500  | -0.65459400 | -2.84545800 |
| C | 3.23925600  | -0.83602600 | -1.48203300 |
| C | 3.99497300  | -1.64120300 | -2.33962800 |
| C | 3.63368800  | -0.74172200 | -0.14432900 |
| C | 5.11593900  | -2.32672600 | -1.87888600 |
| H | 3.69653800  | -1.72865400 | -3.38186000 |
| C | 4.74928800  | -1.43073700 | 0.32400000  |
| H | 3.07679300  | -0.11356500 | 0.54571100  |
| C | 5.49696600  | -2.22478200 | -0.54229700 |
| H | 5.68915000  | -2.94612600 | -2.56187200 |
| H | 5.03385800  | -1.33956100 | 1.36886600  |
| H | 6.36801700  | -2.76171200 | -0.17984100 |

|   |             |            |             |
|---|-------------|------------|-------------|
| H | 0.92092500  | 3.00432800 | -2.69846000 |
| C | -2.77893800 | 3.08295000 | -0.41504200 |
| C | -1.86482400 | 3.25215500 | 0.65784000  |
| C | -2.29358800 | 3.91799200 | 1.81886600  |
| C | -3.59602400 | 4.38713900 | 1.88168500  |
| C | -4.48679800 | 4.20952200 | 0.80237200  |
| C | -4.09137800 | 3.56229700 | -0.35737400 |
| C | -0.84707400 | 2.06986000 | -0.98737200 |
| C | -0.64386000 | 2.60783000 | 0.26274100  |
| H | -1.61285400 | 4.05760500 | 2.65397800  |
| H | -3.94014400 | 4.90109800 | 2.77376600  |
| H | -5.50167300 | 4.58534000 | 0.88319300  |
| H | -4.77929200 | 3.41218100 | -1.18308400 |
| H | 0.26246800  | 2.54796500 | 0.84188800  |
| N | -2.11786200 | 2.38537900 | -1.39611400 |
| H | -2.47257500 | 2.00978500 | -2.26532800 |
| C | -0.05990100 | 1.13470700 | -1.91011300 |
| O | -0.91591600 | 0.34231600 | -2.60142800 |
| C | 0.94840300  | 1.92021200 | -2.84204900 |
| C | 2.36375700  | 1.34298100 | -2.62431500 |
| H | 0.60764100  | 1.70359000 | -3.85727500 |
| H | 2.89078000  | 1.21553700 | -3.57617800 |
| C | 3.26311100  | 2.14586600 | -1.70534400 |
| C | 4.65006800  | 1.96925400 | -1.78064500 |
| C | 2.76453500  | 3.01513600 | -0.73075300 |
| C | 5.50912500  | 2.62177300 | -0.90292600 |
| H | 5.05633900  | 1.29355100 | -2.52958300 |
| C | 3.62085800  | 3.66705400 | 0.15721500  |
| H | 1.69633600  | 3.19911100 | -0.66631200 |
| C | 4.99618300  | 3.47009100 | 0.07739700  |

|   |            |            |             |
|---|------------|------------|-------------|
| H | 6.58070700 | 2.46645300 | -0.98243700 |
| H | 3.20748200 | 4.33724800 | 0.90542800  |
| H | 5.66390000 | 3.97916000 | 0.76523400  |

M5RS

|   |             |             |             |
|---|-------------|-------------|-------------|
| C | -0.17499600 | -0.48484000 | 0.45977900  |
| O | 0.09854000  | -0.23212600 | 1.61624500  |
| C | -1.21899400 | 0.10554500  | -0.38163600 |
| C | -2.25503400 | 0.98271600  | 0.28504500  |
| H | -1.67874100 | -0.66646900 | -1.00758000 |
| H | -1.74362500 | 1.70931000  | 0.92622700  |
| C | -3.29486200 | 0.27044300  | 1.12062800  |
| C | -3.96519600 | 0.96570200  | 2.13334900  |
| C | -3.64790300 | -1.06113400 | 0.88170700  |
| C | -4.95883500 | 0.34709700  | 2.88716200  |
| H | -3.70100800 | 2.00246300  | 2.32856100  |
| C | -4.63620500 | -1.68489400 | 1.63934500  |
| H | -3.15087500 | -1.63029700 | 0.10062200  |
| C | -5.29751600 | -0.98284300 | 2.64393300  |
| H | -5.46599500 | 0.90237600  | 3.67008800  |
| H | -4.88247100 | -2.72489000 | 1.44180500  |
| H | -6.06772000 | -1.46786800 | 3.23510900  |
| H | -1.45040800 | 2.88783200  | -2.17508600 |
| C | 2.55513400  | 2.95605200  | -1.12205100 |
| C | 2.03457800  | 3.28696300  | 0.15751600  |
| C | 2.80254800  | 4.10266900  | 1.00732600  |
| C | 4.03920100  | 4.55239500  | 0.57468900  |
| C | 4.53643100  | 4.20970900  | -0.69910400 |
| C | 3.80363500  | 3.41225300  | -1.56365500 |
| C | 0.56129200  | 1.93041300  | -0.90330900 |

|   |             |             |             |
|---|-------------|-------------|-------------|
| C | 0.76105500  | 2.62730200  | 0.27056900  |
| H | 2.43030700  | 4.37304200  | 1.99116200  |
| H | 4.63930200  | 5.18132200  | 1.22457400  |
| H | 5.50755500  | 4.58073700  | -1.01083400 |
| H | 4.17857400  | 3.15165900  | -2.54911300 |
| H | 0.11341700  | 2.64752400  | 1.13465600  |
| N | 1.63593100  | 2.14184000  | -1.72897200 |
| H | 1.67879000  | 1.59693800  | -2.58474200 |
| C | -0.49407600 | 0.99628300  | -1.52972200 |
| O | 0.07964200  | 0.24198900  | -2.46336900 |
| C | -1.73947400 | 1.85004200  | -1.98569300 |
| C | -2.87129600 | 1.74602600  | -0.93209200 |
| H | -2.06027300 | 1.41453800  | -2.93566200 |
| H | -3.65995900 | 1.09652200  | -1.33037100 |
| C | -3.51032700 | 3.04813200  | -0.51397700 |
| C | -4.89912800 | 3.18371300  | -0.47328300 |
| C | -2.72049200 | 4.12939300  | -0.10464200 |
| C | -5.49024000 | 4.37070700  | -0.04246200 |
| H | -5.52276000 | 2.34722200  | -0.77857500 |
| C | -3.30608700 | 5.31482300  | 0.32756400  |
| H | -1.63580200 | 4.03541100  | -0.12612800 |
| C | -4.69511200 | 5.44023400  | 0.35864300  |
| H | -6.57216200 | 4.45780500  | -0.02017500 |
| H | -2.67875400 | 6.14432600  | 0.63913700  |
| H | -5.15175400 | 6.36609300  | 0.69395500  |
| C | 5.10316500  | -0.57332200 | 1.18563600  |
| C | 3.72836100  | -0.75889600 | 1.30833200  |
| C | 3.16056000  | -1.29741300 | 2.45756500  |
| C | 4.00839900  | -1.66027600 | 3.50179900  |
| C | 5.38896400  | -1.47778800 | 3.38861400  |

|   |             |             |             |
|---|-------------|-------------|-------------|
| C | 5.94630000  | -0.93158600 | 2.23363700  |
| C | 5.44793300  | 0.03896100  | -0.14867900 |
| C | 4.16582200  | -0.10009600 | -0.99508300 |
| C | 3.01562400  | -0.29604500 | 0.05661600  |
| H | 2.08366400  | -1.42120100 | 2.53524300  |
| H | 3.59431700  | -2.08538100 | 4.40998500  |
| H | 6.03543800  | -1.76754700 | 4.21074000  |
| H | 7.02018100  | -0.79485100 | 2.15046000  |
| H | 6.28865100  | -0.44552000 | -0.65284200 |
| H | 3.97657100  | 0.78978700  | -1.59246200 |
| H | 5.69531100  | 1.10084900  | -0.03470600 |
| H | 2.45497300  | 0.63082200  | 0.21509200  |
| N | 2.07516100  | -1.31453600 | -0.41720600 |
| O | 4.25088000  | -1.15302500 | -1.94852200 |
| C | 0.75380100  | -1.43582400 | -0.27809700 |
| C | 2.50588100  | -2.42509500 | -1.08916800 |
| N | 0.43086500  | -2.60294700 | -0.81989200 |
| N | 1.51843300  | -3.23550100 | -1.34581500 |
| C | 3.94872700  | -2.45169100 | -1.47585800 |
| H | 4.57258700  | -2.74026800 | -0.61968500 |
| H | 4.11059200  | -3.15468100 | -2.29228300 |
| C | -0.86359100 | -3.23188600 | -0.77395700 |
| C | -1.28471900 | -3.77187100 | 0.44274400  |
| C | -1.62909100 | -3.25785400 | -1.94652000 |
| C | -2.55613300 | -4.34835300 | 0.47262800  |
| C | -2.89312000 | -3.83424100 | -1.85458900 |
| C | -3.37280300 | -4.37753800 | -0.65704900 |
| H | -2.91550000 | -4.77498700 | 1.40545900  |
| H | -3.52156500 | -3.85932200 | -2.74123100 |
| C | -1.10140200 | -2.66647300 | -3.22401200 |

|   |             |             |             |
|---|-------------|-------------|-------------|
| H | -0.23108000 | -3.23204500 | -3.57270400 |
| H | -0.77928200 | -1.62493600 | -3.07014100 |
| H | -1.86718200 | -2.70417600 | -4.00069900 |
| C | -4.75698200 | -4.96845500 | -0.59694700 |
| H | -4.89501100 | -5.72225000 | -1.37670500 |
| H | -5.51175500 | -4.19202800 | -0.75674700 |
| H | -4.94738600 | -5.43499500 | 0.37169200  |
| C | -0.42250800 | -3.72469800 | 1.67782200  |
| H | -0.47021100 | -2.73916100 | 2.15415200  |
| H | 0.62562700  | -3.93657400 | 1.44639300  |
| H | -0.76752300 | -4.46057800 | 2.40534000  |

M5SR

|   |             |            |             |
|---|-------------|------------|-------------|
| C | -4.94916600 | 1.25173500 | -0.61187400 |
| C | -3.65479500 | 1.04673600 | -0.13675200 |
| C | -3.39323800 | 0.62907000 | 1.16121900  |
| C | -4.49146800 | 0.36558200 | 1.98180100  |
| C | -5.79523600 | 0.52849000 | 1.50965500  |
| C | -6.03595900 | 0.98119500 | 0.21151400  |
| C | -4.91935900 | 1.79581100 | -2.02046900 |
| C | -3.46929800 | 2.28613400 | -2.20052600 |
| C | -2.65151600 | 1.39350900 | -1.21523500 |
| H | -2.36526100 | 0.51870600 | 1.52106800  |
| H | -4.32987700 | 0.03414100 | 3.00346800  |
| H | -6.63363300 | 0.31787000 | 2.16636200  |
| H | -7.05121600 | 1.13548000 | -0.14111300 |
| H | -5.62151400 | 2.61554200 | -2.19169000 |
| H | -3.11200500 | 2.17115600 | -3.22466100 |
| H | -5.13805000 | 1.00953800 | -2.75176600 |
| H | -2.24660000 | 0.50857500 | -1.71330400 |

|   |             |            |             |
|---|-------------|------------|-------------|
| N | -1.52973300 | 2.15890600 | -0.67595100 |
| O | -3.33165100 | 3.68025100 | -1.92405100 |
| C | -0.26924600 | 1.82516400 | -0.38766000 |
| C | -1.71089300 | 3.44636100 | -0.25805900 |
| N | 0.27428500  | 2.89936500 | 0.17407000  |
| N | -0.61451100 | 3.93157100 | 0.25418800  |
| C | -3.03143300 | 4.06528000 | -0.59225600 |
| H | -3.79911500 | 3.74200100 | 0.12079100  |
| H | -2.95312000 | 5.15187900 | -0.57391700 |
| C | 1.64377900  | 3.06705300 | 0.59328600  |
| C | 2.64603700  | 3.12813300 | -0.37718800 |
| C | 1.89088100  | 3.14193500 | 1.97044100  |
| C | 3.95507900  | 3.29564400 | 0.07834400  |
| C | 3.21688700  | 3.29462000 | 2.36458300  |
| C | 4.25889300  | 3.37298700 | 1.43526600  |
| H | 4.75478400  | 3.35430400 | -0.65553300 |
| H | 3.44267800  | 3.34708000 | 3.42654000  |
| C | 0.77411200  | 2.98926700 | 2.96487600  |
| H | 0.30453500  | 2.00469900 | 2.82391800  |
| H | 0.01121800  | 3.76066600 | 2.82663600  |
| H | 1.16337300  | 3.06693400 | 3.98141000  |
| C | 5.68777100  | 3.49700800 | 1.89506700  |
| H | 6.11464300  | 2.50540100 | 2.08010100  |
| H | 5.75657300  | 4.06424700 | 2.82586700  |
| H | 6.30499100  | 3.98824700 | 1.13973900  |
| C | 2.38171300  | 2.97200900 | -1.85205400 |
| H | 2.51519900  | 1.92460300 | -2.15196900 |
| H | 3.09566600  | 3.56757100 | -2.42401300 |
| H | 1.37362000  | 3.28333300 | -2.13648600 |
| C | 0.42488000  | 0.55885800 | -0.85123600 |



|   |             |             |             |
|---|-------------|-------------|-------------|
| O | 0.25355200  | 0.26984500  | -2.01899400 |
| C | 1.15979000  | -0.19121100 | 0.17141800  |
| C | 2.02239100  | -1.33674700 | -0.32973600 |
| H | 1.74317600  | 0.50819800  | 0.78285900  |
| H | 1.42227000  | -1.95672300 | -1.00380600 |
| C | 3.24609300  | -0.86536100 | -1.08019700 |
| C | 3.40340300  | -1.15721700 | -2.43751600 |
| C | 4.21525600  | -0.07529600 | -0.45086500 |
| C | 4.50062700  | -0.67777000 | -3.15011700 |
| H | 2.65080900  | -1.75966700 | -2.93912500 |
| C | 5.31336100  | 0.40412200  | -1.15874600 |
| H | 4.10712500  | 0.18059800  | 0.60197300  |
| C | 5.45974500  | 0.10513900  | -2.51247100 |
| H | 4.60466100  | -0.91505100 | -4.20430200 |
| H | 6.05465800  | 1.01548000  | -0.65178900 |
| H | 6.31583300  | 0.47915500  | -3.06498800 |
| H | 0.67451200  | -2.63895700 | 2.39308700  |
| C | -2.92084600 | -2.71214500 | 0.81691200  |
| C | -2.55094400 | -2.74093700 | -0.55172900 |
| C | -3.40342400 | -3.37248300 | -1.47077900 |
| C | -4.58661800 | -3.93428300 | -1.01621200 |
| C | -4.94163000 | -3.87835800 | 0.34548800  |
| C | -4.11634800 | -3.26956500 | 1.27873100  |
| C | -0.95194700 | -1.62981200 | 0.61014700  |
| C | -1.29473700 | -2.04505300 | -0.65636900 |
| H | -3.13994300 | -3.41558800 | -2.52387100 |
| H | -5.25477500 | -4.42253400 | -1.71877800 |
| H | -5.87821300 | -4.32040400 | 0.67076800  |
| H | -4.38662400 | -3.22344400 | 2.32917300  |
| H | -0.72627600 | -1.89101600 | -1.56167800 |

|   |             |             |             |
|---|-------------|-------------|-------------|
| N | -1.91703500 | -2.06454900 | 1.49205700  |
| H | -1.95675100 | -1.67692100 | 2.42501100  |
| C | 0.15661500  | -0.80042500 | 1.27015700  |
| O | -0.38933400 | 0.12098800  | 2.06806100  |
| C | 1.18150100  | -1.76880900 | 1.96566600  |
| C | 2.30361700  | -2.15845900 | 0.97109600  |
| H | 1.59595100  | -1.18536800 | 2.79336300  |
| H | 3.26129200  | -1.81132500 | 1.37356300  |
| C | 2.45400100  | -3.63153000 | 0.66489600  |
| C | 3.72639000  | -4.19488800 | 0.54116000  |
| C | 1.33822100  | -4.44737100 | 0.44351900  |
| C | 3.88649600  | -5.54026900 | 0.21426000  |
| H | 4.60065000  | -3.56925500 | 0.70527200  |
| C | 1.49452800  | -5.79146000 | 0.11787400  |
| H | 0.33919200  | -4.02320700 | 0.52195000  |
| C | 2.76969300  | -6.34389200 | 0.00375100  |
| H | 4.88402500  | -5.95981000 | 0.12637900  |
| H | 0.61763300  | -6.40992500 | -0.04826800 |
| H | 2.89036200  | -7.39292500 | -0.24741100 |

M5SS

|   |             |             |            |
|---|-------------|-------------|------------|
| C | -2.36143300 | -0.33041500 | 3.78135400 |
| C | -1.83976700 | -0.76190800 | 2.56518200 |
| C | -2.04337100 | -2.05795700 | 2.09961100 |
| C | -2.79126400 | -2.93161400 | 2.88410900 |
| C | -3.31779700 | -2.50669600 | 4.10745700 |
| C | -3.10915500 | -1.20751000 | 4.56356800 |
| C | -2.02013300 | 1.11172300  | 4.05172100 |
| C | -1.03093600 | 1.52145900  | 2.93477200 |
| C | -1.07473300 | 0.34719900  | 1.88195900 |

|   |             |             |             |
|---|-------------|-------------|-------------|
| H | -1.64246800 | -2.38526400 | 1.14258000  |
| H | -2.96679700 | -3.94598400 | 2.54223300  |
| H | -3.89670700 | -3.19935500 | 4.70956700  |
| H | -3.51968800 | -0.88365000 | 5.51487200  |
| H | -1.56424900 | 1.27000200  | 5.03415300  |
| H | -1.33528900 | 2.45131900  | 2.45265200  |
| H | -2.91500100 | 1.73953800  | 4.01028100  |
| H | -1.56934400 | 0.68796200  | 0.97244200  |
| N | 0.28994400  | -0.10062300 | 1.54353100  |
| O | 0.27344100  | 1.78510000  | 3.41592200  |
| C | 0.79518800  | -0.75520300 | 0.47817400  |
| C | 1.25361400  | -0.12346800 | 2.51292600  |
| N | 2.00328000  | -1.17017600 | 0.85245400  |
| N | 2.31339300  | -0.76412700 | 2.11211400  |
| C | 0.99401200  | 0.62462600  | 3.77986200  |
| H | 0.44104800  | 0.00190700  | 4.49607300  |
| H | 1.93726600  | 0.93466800  | 4.22869700  |
| C | 2.94184800  | -2.01911900 | 0.15331800  |
| C | 2.85429900  | -3.39274000 | 0.39603200  |
| C | 3.90438500  | -1.43110600 | -0.66017100 |
| C | 3.81382200  | -4.20057200 | -0.20282000 |
| C | 4.84491500  | -2.28829700 | -1.23685600 |
| C | 4.81794500  | -3.66358000 | -1.01632500 |
| H | 3.77815900  | -5.27388700 | -0.03414500 |
| H | 5.61247400  | -1.86331000 | -1.87828800 |
| C | 3.86202200  | 0.03485800  | -0.97175900 |
| H | 3.62836800  | 0.64198600  | -0.09015900 |
| H | 3.07257800  | 0.20718200  | -1.71941300 |
| H | 4.81618900  | 0.37434800  | -1.38054900 |
| C | 5.83335300  | -4.57098000 | -1.66068700 |

|   |             |             |             |
|---|-------------|-------------|-------------|
| H | 6.23539800  | -5.28542700 | -0.93765300 |
| H | 6.66317100  | -4.00083500 | -2.08256700 |
| H | 5.37397400  | -5.14719700 | -2.46984100 |
| C | 1.74230600  | -3.95831100 | 1.23650200  |
| H | 0.77910700  | -3.79109400 | 0.74150400  |
| H | 1.69875200  | -3.48652600 | 2.22315600  |
| H | 1.87204500  | -5.03235200 | 1.37488300  |
| C | 0.21490500  | -0.98078100 | -0.91261000 |
| O | 0.50009200  | -2.02875500 | -1.45360000 |
| C | -0.53544400 | 0.12627600  | -1.50821400 |
| C | -1.49857100 | -0.26961800 | -2.61639800 |
| H | -1.02659800 | 0.73014500  | -0.74732500 |
| H | -0.87634000 | -0.71680100 | -3.40009200 |
| C | -2.59770300 | -1.23814100 | -2.25892000 |
| C | -2.99832300 | -2.20035000 | -3.18993000 |
| C | -3.25674500 | -1.19981200 | -1.02576700 |
| C | -4.02451200 | -3.09695100 | -2.90134000 |
| H | -2.49272700 | -2.24727400 | -4.15136600 |
| C | -4.27406600 | -2.10117700 | -0.72500300 |
| H | -2.98793600 | -0.44292200 | -0.29176000 |
| C | -4.66323100 | -3.05365800 | -1.66426000 |
| H | -4.31808700 | -3.83652200 | -3.63996800 |
| H | -4.76054600 | -2.05633900 | 0.24499600  |
| H | -5.45669200 | -3.75735600 | -1.43356400 |
| H | -0.74663600 | 2.95057100  | -2.91508200 |
| C | 2.89776300  | 3.40080400  | -0.79830600 |
| C | 2.00875500  | 3.38204300  | 0.30860400  |
| C | 2.35388300  | 4.09065100  | 1.47096300  |
| C | 3.55272700  | 4.78536000  | 1.50160100  |
| C | 4.42218300  | 4.78823500  | 0.39279400  |

|   |             |            |             |
|---|-------------|------------|-------------|
| C | 4.10917100  | 4.09852700 | -0.76854600 |
| C | 1.14646700  | 2.09681900 | -1.34820000 |
| C | 0.89949700  | 2.55113400 | -0.07168700 |
| H | 1.69285800  | 4.07976500 | 2.33291400  |
| H | 3.83198100  | 5.33635000 | 2.39424700  |
| H | 5.35552300  | 5.33939900 | 0.44951200  |
| H | 4.77690100  | 4.09721600 | -1.62425300 |
| H | 0.02710000  | 2.34750700 | 0.53173800  |
| N | 2.32768300  | 2.63616000 | -1.78490300 |
| H | 2.74118100  | 2.28295300 | -2.63870800 |
| C | 0.47381900  | 1.14890200 | -2.34450400 |
| O | 1.35954600  | 0.50946300 | -3.08003800 |
| C | -0.62064400 | 1.90541600 | -3.21286300 |
| C | -1.94950800 | 1.12712100 | -3.15448000 |
| H | -0.21417300 | 1.88990500 | -4.22606100 |
| H | -2.37840900 | 0.99493800 | -4.15318000 |
| C | -3.01931400 | 1.74098400 | -2.27228800 |
| C | -4.36179000 | 1.42482300 | -2.50999500 |
| C | -2.72313300 | 2.55961900 | -1.17537000 |
| C | -5.37281700 | 1.88873900 | -1.67465800 |
| H | -4.61182800 | 0.79001600 | -3.35679600 |
| C | -3.73165500 | 3.01816200 | -0.32753200 |
| H | -1.69530100 | 2.85900600 | -0.98236900 |
| C | -5.06032300 | 2.68154900 | -0.57165700 |
| H | -6.40603600 | 1.62847100 | -1.88287700 |
| H | -3.47494200 | 3.64952300 | 0.51817100  |
| H | -5.84608500 | 3.04193200 | 0.08451700  |

TS6RR

|   |             |             |             |
|---|-------------|-------------|-------------|
| C | -3.84717900 | -2.92095500 | -0.64189000 |
|---|-------------|-------------|-------------|

|   |             |             |             |
|---|-------------|-------------|-------------|
| C | -3.05016300 | -2.03420900 | -1.37554800 |
| C | -2.26127100 | -2.45755100 | -2.43665200 |
| C | -2.25711600 | -3.81794500 | -2.74316700 |
| C | -3.02966900 | -4.71492300 | -2.00297500 |
| C | -3.83639700 | -4.27558400 | -0.95152600 |
| C | -4.66589600 | -2.17597500 | 0.38680000  |
| C | -4.63488700 | -0.74397400 | -0.19269500 |
| C | -3.24728300 | -0.63198400 | -0.86494800 |
| H | -1.65933500 | -1.73460800 | -2.98075900 |
| H | -1.64945500 | -4.18317600 | -3.56450100 |
| H | -3.01389500 | -5.76995400 | -2.25807600 |
| H | -4.45286200 | -4.97699700 | -0.39772700 |
| H | -4.19188000 | -2.21578700 | 1.37693600  |
| H | -5.37005000 | -0.67773700 | -0.99840800 |
| H | -5.68402100 | -2.55494500 | 0.49424900  |
| H | -3.17852800 | 0.14894000  | -1.61294300 |
| N | -2.27821800 | -0.32224400 | 0.23025300  |
| O | -4.93843900 | 0.31984500  | 0.67324600  |
| C | -0.96841200 | -0.59693100 | 0.32972700  |
| C | -2.67856200 | 0.07279700  | 1.48305700  |
| N | -0.64047500 | -0.42127500 | 1.60511800  |
| N | -1.70193000 | -0.00473200 | 2.34507400  |
| C | -4.08745200 | 0.48164300  | 1.78436600  |
| H | -4.43734900 | -0.09367200 | 2.65047800  |
| H | -4.09396200 | 1.54817600  | 2.03567100  |
| C | 0.56852100  | -0.92959300 | 2.20949200  |
| C | 0.69526000  | -2.32922800 | 2.24752900  |
| C | 1.52382500  | -0.06186200 | 2.73650000  |
| C | 1.87248700  | -2.84511800 | 2.77540600  |
| C | 2.68264700  | -0.63753600 | 3.26450800  |

|   |             |             |             |
|---|-------------|-------------|-------------|
| C | 2.88281300  | -2.01523200 | 3.27253600  |
| H | 2.00229900  | -3.92363500 | 2.81229800  |
| H | 3.44682900  | 0.01902000  | 3.67329100  |
| C | 1.35410100  | 1.43221200  | 2.73794100  |
| H | 0.30474900  | 1.72189200  | 2.66947100  |
| H | 1.89401400  | 1.88281100  | 1.89484400  |
| H | 1.77492100  | 1.85376100  | 3.65328900  |
| C | 4.15097600  | -2.61759500 | 3.81613600  |
| H | 4.83156300  | -1.84762000 | 4.18468700  |
| H | 4.66582300  | -3.18724600 | 3.03619400  |
| H | 3.93414200  | -3.30780900 | 4.63626100  |
| C | -0.41432300 | -3.23911700 | 1.78192800  |
| H | -0.49841300 | -3.25515200 | 0.69052400  |
| H | -1.37882600 | -2.92095200 | 2.19236800  |
| H | -0.22453000 | -4.25870700 | 2.11960300  |
| C | 0.10842400  | -0.90613000 | -0.71840400 |
| O | 0.27376100  | -2.02767800 | -1.11954700 |
| C | 0.92576700  | 0.29597600  | -1.07626200 |
| C | 2.07233100  | -0.01967400 | -2.02767100 |
| H | 1.28167000  | 0.77200100  | -0.15045900 |
| H | 1.63103900  | -0.57315600 | -2.86603100 |
| C | 3.20618200  | -0.83803500 | -1.46238300 |
| C | 3.85253100  | -1.77268000 | -2.27553600 |
| C | 3.66018900  | -0.67450000 | -0.14985400 |
| C | 4.92425800  | -2.52255500 | -1.79740000 |
| H | 3.50567600  | -1.91394600 | -3.29636900 |
| C | 4.72784500  | -1.42487200 | 0.33482700  |
| H | 3.19314700  | 0.05773900  | 0.50431500  |
| C | 5.36521900  | -2.35191800 | -0.48685700 |
| H | 5.41039700  | -3.24389900 | -2.44691800 |

|   |             |             |             |
|---|-------------|-------------|-------------|
| H | 5.06467800  | -1.27582600 | 1.35699300  |
| H | 6.19826600  | -2.93669400 | -0.10936900 |
| H | 1.04125800  | 3.10544200  | -2.66391600 |
| C | -2.85604100 | 2.89134600  | -0.51073400 |
| C | -2.01912400 | 3.29827200  | 0.57451900  |
| C | -2.59528700 | 3.97471700  | 1.66494900  |
| C | -3.95969000 | 4.22039300  | 1.66035300  |
| C | -4.77241200 | 3.80591500  | 0.58311200  |
| C | -4.23392800 | 3.14480700  | -0.50878600 |
| C | -0.79782100 | 2.20320500  | -0.95764700 |
| C | -0.69281300 | 2.84261300  | 0.26129100  |
| H | -1.97922900 | 4.29641600  | 2.50037500  |
| H | -4.41560100 | 4.73985300  | 2.49776500  |
| H | -5.83879000 | 4.00646600  | 0.61387300  |
| H | -4.85807900 | 2.81817000  | -1.33499700 |
| H | 0.19122400  | 2.97434200  | 0.86556000  |
| N | -2.06834100 | 2.26004300  | -1.43416800 |
| H | -1.97384600 | 1.45202600  | -2.24408500 |
| C | 0.01377700  | 1.28155600  | -1.87746700 |
| O | -0.93182600 | 0.56898900  | -2.60165800 |
| C | 1.03778500  | 2.02201400  | -2.80773900 |
| C | 2.43086600  | 1.39833800  | -2.58191800 |
| H | 0.69717700  | 1.81735000  | -3.82519100 |
| H | 2.96838700  | 1.27688700  | -3.52808700 |
| C | 3.33014800  | 2.16335200  | -1.63276300 |
| C | 4.71442700  | 1.96472900  | -1.68964600 |
| C | 2.82833300  | 3.02300200  | -0.65129100 |
| C | 5.56907000  | 2.58823100  | -0.78668600 |
| H | 5.12133200  | 1.29593500  | -2.44448300 |
| C | 3.67999400  | 3.64534500  | 0.26191500  |



|   |            |            |             |
|---|------------|------------|-------------|
| H | 1.76194400 | 3.22541900 | -0.60307100 |
| C | 5.05310100 | 3.42668400 | 0.20047100  |
| H | 6.63918600 | 2.41734600 | -0.85110300 |
| H | 3.26533500 | 4.30868100 | 1.01552900  |
| H | 5.71747400 | 3.91223600 | 0.90813700  |

TS6RS

|   |            |             |             |
|---|------------|-------------|-------------|
| C | 4.92354700 | -0.49692600 | 2.17633600  |
| C | 3.54232900 | -0.58297900 | 2.01538500  |
| C | 2.74292800 | -1.23419600 | 2.95108500  |
| C | 3.35582100 | -1.80722900 | 4.06236000  |
| C | 4.74007200 | -1.72146000 | 4.23172900  |
| C | 5.53190500 | -1.06466600 | 3.29313800  |
| C | 5.56383700 | 0.25642900  | 1.04058500  |
| C | 4.45071300 | 0.43506600  | -0.01507300 |
| C | 3.10619900 | 0.10203400  | 0.73703900  |
| H | 1.66652700 | -1.28313800 | 2.82086100  |
| H | 2.75360700 | -2.32190200 | 4.80368200  |
| H | 5.20263900 | -2.17364600 | 5.10314300  |
| H | 6.60777900 | -1.00188300 | 3.42550400  |
| H | 6.41915700 | -0.26672700 | 0.60176500  |
| H | 4.41284900 | 1.45253200  | -0.39781800 |
| H | 5.92016900 | 1.23684400  | 1.37341400  |
| H | 2.51632600 | 1.00711800  | 0.90566500  |
| N | 2.28312100 | -0.80324800 | -0.08193600 |
| O | 4.66604200 | -0.36524800 | -1.17017100 |
| C | 0.95503100 | -0.94256400 | -0.19621400 |
| C | 2.85166300 | -1.77038300 | -0.85686600 |
| N | 0.76370300 | -1.98773700 | -1.00106900 |
| N | 1.94387200 | -2.51395700 | -1.42483600 |

|   |             |             |             |
|---|-------------|-------------|-------------|
| C | 4.33630300  | -1.73080800 | -1.01520900 |
| H | 4.83311900  | -2.18624200 | -0.14758900 |
| H | 4.63304700  | -2.26231200 | -1.91892300 |
| C | -0.47319700 | -2.63681400 | -1.36149000 |
| C | -0.81932600 | -2.66548400 | -2.71784600 |
| C | -1.24786700 | -3.21753400 | -0.35229800 |
| C | -2.01204000 | -3.30362000 | -3.04904000 |
| C | -2.42766100 | -3.84747200 | -0.74772200 |
| C | -2.82539800 | -3.89950500 | -2.08278700 |
| H | -2.31586900 | -3.32867300 | -4.09223400 |
| H | -3.05267200 | -4.30163400 | 0.01670800  |
| C | -0.88149800 | -3.15430100 | 1.10776700  |
| H | -1.23987300 | -2.22191200 | 1.56266300  |
| H | 0.19810700  | -3.22715500 | 1.27035100  |
| H | -1.36086000 | -3.97423200 | 1.64520500  |
| C | -4.09712200 | -4.60486100 | -2.47413000 |
| H | -4.49858200 | -4.20538400 | -3.40769000 |
| H | -4.85798400 | -4.50453000 | -1.69645100 |
| H | -3.91312000 | -5.67398800 | -2.62106700 |
| C | 0.03728100  | -2.00409200 | -3.76103300 |
| H | 0.23476200  | -0.97153200 | -3.45700800 |
| H | -0.48448700 | -1.99216900 | -4.71920100 |
| H | 0.98627200  | -2.53132100 | -3.88743800 |
| C | -0.06821800 | -0.09229600 | 0.53325100  |
| O | 0.21342300  | 0.23504500  | 1.66800300  |
| C | -1.25623600 | 0.32181800  | -0.23528900 |
| C | -2.38831300 | 0.89942800  | 0.60621700  |
| H | -1.62160600 | -0.50726300 | -0.84761600 |
| H | -1.96167500 | 1.61617600  | 1.32092600  |
| C | -3.14326900 | -0.15693400 | 1.37519700  |

|   |             |             |             |
|---|-------------|-------------|-------------|
| C | -3.04953900 | -0.21708800 | 2.76804100  |
| C | -3.89546700 | -1.13257000 | 0.71179100  |
| C | -3.68948900 | -1.22648600 | 3.48471500  |
| H | -2.46028300 | 0.53159700  | 3.29069400  |
| C | -4.53984200 | -2.13930400 | 1.42533000  |
| H | -3.97009000 | -1.11698500 | -0.37357700 |
| C | -4.43747200 | -2.19126900 | 2.81465000  |
| H | -3.60342700 | -1.25785300 | 4.56635200  |
| H | -5.12135200 | -2.88699200 | 0.89366100  |
| H | -4.93896800 | -2.97781400 | 3.36934100  |
| H | -1.74680300 | 3.29886900  | -0.61594300 |
| C | 2.48808800  | 2.50642700  | -1.88080600 |
| C | 2.37548500  | 3.20360100  | -0.63416900 |
| C | 3.47757800  | 3.94643300  | -0.17014200 |
| C | 4.63146800  | 3.99520600  | -0.93698000 |
| C | 4.71989400  | 3.31122700  | -2.16876900 |
| C | 3.65817000  | 2.56293300  | -2.65118800 |
| C | 0.46877100  | 2.11381600  | -1.06932000 |
| C | 1.05847000  | 2.93231900  | -0.12755700 |
| H | 3.42259400  | 4.47792600  | 0.77609600  |
| H | 5.48474800  | 4.56886100  | -0.58801200 |
| H | 5.63853500  | 3.36868600  | -2.74423700 |
| H | 3.72664200  | 2.02676600  | -3.59252300 |
| H | 0.61933300  | 3.30318300  | 0.78889600  |
| N | 1.31239300  | 1.84588600  | -2.09724500 |
| H | 0.59205300  | 1.26692400  | -2.77217900 |
| C | -0.87511300 | 1.42771200  | -1.35756600 |
| O | -0.75370500 | 0.84163800  | -2.57698000 |
| C | -2.06443900 | 2.42886100  | -1.20196700 |
| C | -3.18258000 | 1.69136000  | -0.45480200 |

|   |             |            |             |
|---|-------------|------------|-------------|
| H | -2.36164100 | 2.77326100 | -2.19472500 |
| H | -3.63578200 | 0.96837900 | -1.14599800 |
| C | -4.28037300 | 2.55095700 | 0.12126900  |
| C | -5.61890500 | 2.27333800 | -0.16480600 |
| C | -3.99003200 | 3.62072200 | 0.97550800  |
| C | -6.64366800 | 3.04631000 | 0.37720600  |
| H | -5.85827900 | 1.43989000 | -0.82053500 |
| C | -5.00965500 | 4.39524300 | 1.51965000  |
| H | -2.95553400 | 3.85310100 | 1.21740900  |
| C | -6.34181700 | 4.11157400 | 1.22078600  |
| H | -7.67751500 | 2.81482300 | 0.14006100  |
| H | -4.76465900 | 5.22346800 | 2.17734200  |
| H | -7.13699700 | 4.71695900 | 1.64401300  |

TS6SR

|   |             |             |             |
|---|-------------|-------------|-------------|
| C | -5.23764000 | -0.32814500 | 0.16379000  |
| C | -3.93957900 | -0.46683300 | -0.32467000 |
| C | -3.67270000 | -0.56002600 | -1.68407200 |
| C | -4.74649700 | -0.46602700 | -2.56913800 |
| C | -6.04760400 | -0.29030000 | -2.09151700 |
| C | -6.30467000 | -0.22730200 | -0.72135500 |
| C | -5.23185900 | -0.33439600 | 1.67264900  |
| C | -3.88268900 | -0.98693000 | 2.01611100  |
| C | -2.96655500 | -0.55131100 | 0.83660200  |
| H | -2.65394200 | -0.69721500 | -2.04025700 |
| H | -4.56985300 | -0.53372200 | -3.63744700 |
| H | -6.87071900 | -0.22071500 | -2.79548600 |
| H | -7.32028100 | -0.11820200 | -0.35352700 |
| H | -6.05904700 | -0.88781300 | 2.12267200  |
| H | -3.48242900 | -0.65939100 | 2.97662100  |

|   |             |             |             |
|---|-------------|-------------|-------------|
| H | -5.25244500 | 0.69267400  | 2.05843900  |
| H | -2.46333700 | 0.40089000  | 1.03968300  |
| N | -1.95778700 | -1.58139100 | 0.60583000  |
| O | -3.98423800 | -2.40945000 | 2.12090800  |
| C | -0.64931600 | -1.53710700 | 0.33947200  |
| C | -2.34582900 | -2.88943700 | 0.51711900  |
| N | -0.29462700 | -2.78896400 | 0.06855000  |
| N | -1.34282200 | -3.65458900 | 0.18775700  |
| C | -3.74307900 | -3.19513000 | 0.96320700  |
| H | -4.46249500 | -2.99912000 | 0.16078100  |
| H | -3.81144900 | -4.24101800 | 1.26238200  |
| C | 1.02742400  | -3.26649100 | -0.24974800 |
| C | 1.85763500  | -3.65670800 | 0.80035500  |
| C | 1.38686900  | -3.33078600 | -1.60053300 |
| C | 3.12067300  | -4.13949600 | 0.45714700  |
| C | 2.66587300  | -3.80237500 | -1.88422100 |
| C | 3.54065700  | -4.21124400 | -0.87089200 |
| H | 3.79451700  | -4.45195200 | 1.25049600  |
| H | 2.98598800  | -3.85961700 | -2.92151200 |
| C | 0.42679400  | -2.89783000 | -2.67574000 |
| H | 0.15684100  | -1.83699900 | -2.57409000 |
| H | -0.49955800 | -3.47911600 | -2.61941200 |
| H | 0.86814300  | -3.05318300 | -3.66121200 |
| C | 4.92181400  | -4.70061700 | -1.21966500 |
| H | 5.45306200  | -5.05408800 | -0.33371700 |
| H | 5.50974000  | -3.89665400 | -1.67388300 |
| H | 4.87515900  | -5.51835100 | -1.94398400 |
| C | 1.41384500  | -3.53788500 | 2.23364600  |
| H | 1.33311600  | -2.48656700 | 2.53143200  |
| H | 2.13378500  | -4.01825400 | 2.89695100  |

|   |             |             |             |
|---|-------------|-------------|-------------|
| H | 0.43610300  | -4.00328400 | 2.38799300  |
| C | 0.30020900  | -0.39420900 | 0.68165400  |
| O | 0.21522600  | -0.00258300 | 1.82338800  |
| C | 1.16248800  | 0.15142700  | -0.38414800 |
| C | 2.28617000  | 1.05751800  | 0.09121600  |
| H | 1.52141300  | -0.65598000 | -1.03243300 |
| H | 1.85141600  | 1.78872400  | 0.78223300  |
| C | 3.44854900  | 0.38972800  | 0.78378700  |
| C | 4.08167700  | 1.02906500  | 1.85397300  |
| C | 3.95696800  | -0.83574500 | 0.34151600  |
| C | 5.19372900  | 0.46023700  | 2.46948000  |
| H | 3.69719800  | 1.98479200  | 2.20135700  |
| C | 5.06815700  | -1.40741900 | 0.95599200  |
| H | 3.48703300  | -1.35850200 | -0.48982800 |
| C | 5.69092900  | -0.76172300 | 2.02174500  |
| H | 5.67116000  | 0.97089400  | 3.29985500  |
| H | 5.44489500  | -2.36248800 | 0.60047300  |
| H | 6.55625000  | -1.20845200 | 2.50074600  |
| H | 1.08967000  | 2.86898900  | -2.30698500 |
| C | -2.75335900 | 2.62181600  | -0.32305200 |
| C | -2.00929300 | 3.25289800  | 0.72172700  |
| C | -2.69230200 | 4.07068900  | 1.64223000  |
| C | -4.06239600 | 4.22728200  | 1.51874500  |
| C | -4.78320400 | 3.58516700  | 0.48730000  |
| C | -4.14171800 | 2.78392900  | -0.44225200 |
| C | -0.64136400 | 1.99268900  | -0.53398800 |
| C | -0.64409600 | 2.83505300  | 0.56390100  |
| H | -2.15209200 | 4.56748700  | 2.44372100  |
| H | -4.59751700 | 4.85265400  | 2.22713200  |
| H | -5.85826200 | 3.72487700  | 0.42219400  |

|   |             |            |             |
|---|-------------|------------|-------------|
| H | -4.68787000 | 2.27917300 | -1.23497900 |
| H | 0.18673200  | 3.10885200 | 1.19859500  |
| N | -1.88594300 | 1.87397600 | -1.06445900 |
| H | -1.64383900 | 1.04770700 | -1.85739500 |
| C | 0.28873100  | 1.06224200 | -1.34160900 |
| O | -0.53263400 | 0.32996000 | -2.15964600 |
| C | 1.41214300  | 1.84958600 | -2.08102700 |
| C | 2.69697300  | 1.80470000 | -1.21690500 |
| H | 1.57384500  | 1.33373600 | -3.03088800 |
| H | 3.43668200  | 1.16981600 | -1.71876500 |
| C | 3.35714600  | 3.12737700 | -0.90900100 |
| C | 4.74869300  | 3.24461400 | -0.93087700 |
| C | 2.59790500  | 4.24068000 | -0.53108000 |
| C | 5.37088200  | 4.44531400 | -0.59383700 |
| H | 5.34896900  | 2.38318700 | -1.21332200 |
| C | 3.21565400  | 5.44111300 | -0.19354400 |
| H | 1.51301000  | 4.16250300 | -0.49940600 |
| C | 4.60546600  | 5.54851900 | -0.22583400 |
| H | 6.45373700  | 4.51814300 | -0.62083200 |
| H | 2.61102600  | 6.29599500 | 0.09324400  |
| H | 5.08725300  | 6.48591800 | 0.03345400  |

TS6SS

|   |             |             |             |
|---|-------------|-------------|-------------|
| C | -0.08582000 | -0.25930200 | -1.24623100 |
| O | -0.23672800 | -0.84659000 | -2.29599600 |
| C | 0.95146100  | -0.53132700 | -0.22631200 |
| C | 2.24857800  | -1.18279900 | -0.74902000 |
| H | 1.17115900  | 0.37133900  | 0.35040500  |
| H | 2.06071400  | -1.59043400 | -1.74682400 |
| C | 3.38057600  | -0.18366000 | -0.85493900 |

|   |             |             |             |
|---|-------------|-------------|-------------|
| C | 3.95949200  | 0.10470800  | -2.09228400 |
| C | 3.90017600  | 0.44618100  | 0.28253000  |
| C | 5.03002900  | 0.99292000  | -2.19753100 |
| H | 3.57484400  | -0.38423700 | -2.98475000 |
| C | 4.97911500  | 1.31710700  | 0.18700700  |
| H | 3.46677300  | 0.23982300  | 1.25857600  |
| C | 5.54897600  | 1.59566600  | -1.05542200 |
| H | 5.46551400  | 1.19951000  | -3.17041400 |
| H | 5.37829600  | 1.78098900  | 1.08415500  |
| H | 6.39267600  | 2.27514000  | -1.12921400 |
| H | 2.05068100  | -1.29100100 | 2.09589200  |
| C | -2.83418900 | -0.69010500 | 2.13922300  |
| C | -2.13588800 | 0.32385700  | 2.87266000  |
| C | -2.87359300 | 1.21458700  | 3.67516000  |
| C | -4.25237600 | 1.09386400  | 3.73273900  |
| C | -4.92390300 | 0.08295000  | 3.01433100  |
| C | -4.22790700 | -0.81900900 | 2.22417500  |
| C | -0.68327900 | -0.89465400 | 1.69161700  |
| C | -0.74152200 | 0.16759000  | 2.56663000  |
| H | -2.36511200 | 1.99042600  | 4.24247700  |
| H | -4.82795000 | 1.78043600  | 4.34624700  |
| H | -6.00416100 | 0.00205400  | 3.09167900  |
| H | -4.73888500 | -1.61296500 | 1.68920100  |
| H | 0.08501900  | 0.76241800  | 2.93271500  |
| N | -1.91134500 | -1.41071100 | 1.43446100  |
| H | -1.59269300 | -2.24438800 | 0.69051700  |
| C | 0.32411300  | -1.60826000 | 0.80189200  |
| O | -0.34108000 | -2.60229800 | 0.16091700  |
| C | 1.62866400  | -2.08083700 | 1.46019100  |
| C | 2.51210400  | -2.38018600 | 0.24832900  |



|   |             |             |             |
|---|-------------|-------------|-------------|
| H | 1.43937900  | -2.96301500 | 2.07861400  |
| H | 2.05679700  | -3.25428600 | -0.22994800 |
| C | 3.96605500  | -2.70119200 | 0.50413300  |
| C | 4.79560700  | -3.01690000 | -0.57971500 |
| C | 4.52195100  | -2.70783300 | 1.78399100  |
| C | 6.13892100  | -3.31840900 | -0.39357300 |
| H | 4.37684500  | -3.01616900 | -1.58382700 |
| C | 5.86992100  | -3.01366700 | 1.97718100  |
| H | 3.90170000  | -2.47331500 | 2.64390000  |
| C | 6.68356400  | -3.31675800 | 0.89110200  |
| H | 6.76282900  | -3.55741900 | -1.24933800 |
| H | 6.28145500  | -3.01324700 | 2.98198800  |
| H | 7.73234700  | -3.55216700 | 1.04157800  |
| C | -4.68029500 | -1.77888100 | -1.02117800 |
| C | -3.38676500 | -1.64870000 | -1.54124600 |
| C | -2.54423600 | -2.75253900 | -1.62948900 |
| C | -2.99578800 | -3.97569100 | -1.13483600 |
| C | -4.27438100 | -4.10045300 | -0.59351900 |
| C | -5.13364900 | -3.00341300 | -0.54710600 |
| C | -5.43323600 | -0.48183900 | -1.11217500 |
| C | -4.66347200 | 0.22815200  | -2.24000700 |
| C | -3.18714700 | -0.25750500 | -2.10239700 |
| H | -1.54532800 | -2.66902100 | -2.03394500 |
| H | -2.33929600 | -4.83834600 | -1.17427300 |
| H | -4.61063500 | -5.06282900 | -0.22078000 |
| H | -6.14084500 | -3.10308600 | -0.15327200 |
| H | -5.36195300 | 0.05494200  | -0.15799700 |
| H | -5.01223200 | -0.16524200 | -3.19766500 |
| H | -6.49088600 | -0.60011800 | -1.35600000 |
| H | -2.65458400 | -0.25470900 | -3.05413200 |

|   |             |            |             |
|---|-------------|------------|-------------|
| N | -2.44348400 | 0.73921500 | -1.25118200 |
| O | -4.83105300 | 1.62398600 | -2.32989000 |
| C | -1.12961500 | 0.80491800 | -0.94425900 |
| C | -2.96373300 | 1.96786200 | -0.93311500 |
| N | -0.91064600 | 2.03861300 | -0.48764000 |
| N | -2.04850000 | 2.77427600 | -0.47771500 |
| C | -4.39388800 | 2.31406700 | -1.18235500 |
| H | -4.99935800 | 2.08194200 | -0.29818900 |
| H | -4.46765700 | 3.38289800 | -1.38401500 |
| C | 0.34736800  | 2.69040100 | -0.21908400 |
| C | 0.52344300  | 3.31387700 | 1.02419200  |
| C | 1.30705900  | 2.73848000 | -1.23965600 |
| C | 1.76058600  | 3.90727300 | 1.26309400  |
| C | 2.51996400  | 3.35806400 | -0.94238500 |
| C | 2.77339900  | 3.92665700 | 0.30290900  |
| H | 1.92891600  | 4.38097800 | 2.22736200  |
| H | 3.28866400  | 3.38764600 | -1.71027800 |
| C | 1.08155700  | 2.20148000 | -2.63098400 |
| H | 1.45158200  | 1.17745000 | -2.73475200 |
| H | 1.63582200  | 2.81449600 | -3.34415000 |
| H | 0.02801300  | 2.21781300 | -2.92299700 |
| C | 4.09226600  | 4.58896200 | 0.59982100  |
| H | 4.82434100  | 4.37552400 | -0.18151300 |
| H | 4.49556500  | 4.23984000 | 1.55445200  |
| H | 3.97122500  | 5.67434000 | 0.67237800  |
| C | -0.57393500 | 3.43032900 | 2.04808700  |
| H | -1.13142200 | 4.35780500 | 1.88277000  |
| H | -0.14678500 | 3.46783800 | 3.05315100  |
| H | -1.28062300 | 2.60360500 | 2.00141800  |

## M6RR

|   |             |             |             |
|---|-------------|-------------|-------------|
| C | -3.92104500 | -2.85572500 | -0.61687800 |
| C | -3.10122700 | -1.99680100 | -1.36069500 |
| C | -2.33809900 | -2.46067500 | -2.42452800 |
| C | -2.37837600 | -3.82311500 | -2.71903000 |
| C | -3.17207600 | -4.68904800 | -1.96546800 |
| C | -3.95610900 | -4.21251800 | -0.91371200 |
| C | -4.71291200 | -2.08162500 | 0.40919700  |
| C | -4.64393600 | -0.65514400 | -0.17968500 |
| C | -3.25156700 | -0.58501400 | -0.85111600 |
| H | -1.71759500 | -1.77585400 | -2.99456300 |
| H | -1.78962900 | -4.21285600 | -3.54280700 |
| H | -3.19127900 | -5.74627100 | -2.21062600 |
| H | -4.59183000 | -4.88698500 | -0.34832500 |
| H | -4.23410900 | -2.12781300 | 1.39682600  |
| H | -5.37638300 | -0.57312800 | -0.98636200 |
| H | -5.74051200 | -2.43176200 | 0.52420900  |
| H | -3.15195500 | 0.22572700  | -1.57164300 |
| N | -2.28211200 | -0.31453200 | 0.25532500  |
| O | -4.91883900 | 0.41680400  | 0.68315100  |
| C | -0.97466700 | -0.59534000 | 0.35108700  |
| C | -2.67039100 | 0.10582700  | 1.50220000  |
| N | -0.63723700 | -0.41227900 | 1.62214400  |
| N | -1.69062700 | 0.02394700  | 2.36144100  |
| C | -4.06835900 | 0.55291200  | 1.79836500  |
| H | -4.43969100 | -0.01302500 | 2.66204200  |
| H | -4.04249200 | 1.61961100  | 2.04833900  |
| C | 0.57344900  | -0.91709200 | 2.22336100  |
| C | 0.70711200  | -2.31651500 | 2.25625000  |
| C | 1.52165100  | -0.04642100 | 2.75965600  |

|   |             |             |             |
|---|-------------|-------------|-------------|
| C | 1.88523300  | -2.82862200 | 2.78574000  |
| C | 2.68057200  | -0.61923500 | 3.29056300  |
| C | 2.88773500  | -1.99600100 | 3.29360600  |
| H | 2.02043100  | -3.90661900 | 2.81847600  |
| H | 3.43909600  | 0.03901800  | 3.70702500  |
| C | 1.34785700  | 1.44779300  | 2.76985500  |
| H | 0.29965000  | 1.73895000  | 2.69077100  |
| H | 1.89911500  | 1.90481200  | 1.93777600  |
| H | 1.75772200  | 1.86261300  | 3.69319800  |
| C | 4.15344900  | -2.59484700 | 3.84690400  |
| H | 4.84688600  | -1.82094700 | 4.18188000  |
| H | 4.65373100  | -3.20050800 | 3.08492800  |
| H | 3.93442700  | -3.25062700 | 4.69443900  |
| C | -0.39801300 | -3.23166800 | 1.78909900  |
| H | -0.47144200 | -3.26312900 | 0.69741200  |
| H | -1.36731600 | -2.90872400 | 2.18439000  |
| H | -0.21184100 | -4.24667800 | 2.14222400  |
| C | 0.07964600  | -0.90242100 | -0.71860100 |
| O | 0.23640200  | -2.02102900 | -1.13068100 |
| C | 0.88150300  | 0.30057400  | -1.12642600 |
| C | 2.04399600  | -0.02373200 | -2.05757100 |
| H | 1.22402700  | 0.81702500  | -0.21805500 |
| H | 1.62035600  | -0.57177500 | -2.90806300 |
| C | 3.15762000  | -0.85378300 | -1.46943000 |
| C | 3.80586400  | -1.79754200 | -2.26996600 |
| C | 3.59291300  | -0.68781400 | -0.15101900 |
| C | 4.86476300  | -2.55385700 | -1.77386200 |
| H | 3.47245500  | -1.93993000 | -3.29505900 |
| C | 4.64957800  | -1.44282400 | 0.34983700  |
| H | 3.12454200  | 0.05226800  | 0.49369000  |

|   |             |             |             |
|---|-------------|-------------|-------------|
| C | 5.29035400  | -2.37869200 | -0.45907000 |
| H | 5.35374900  | -3.28212000 | -2.41330800 |
| H | 4.97696700  | -1.28889500 | 1.37403500  |
| H | 6.11482500  | -2.96648200 | -0.06781600 |
| H | 1.07781400  | 3.13654500  | -2.50207400 |
| C | -2.84851500 | 2.92414200  | -0.52006500 |
| C | -1.95791700 | 3.21780100  | 0.56610300  |
| C | -2.44530800 | 3.88231700  | 1.70942700  |
| C | -3.78321600 | 4.23549600  | 1.76364600  |
| C | -4.65923900 | 3.93860500  | 0.69234800  |
| C | -4.20435700 | 3.29148800  | -0.44294200 |
| C | -0.92708300 | 2.11413200  | -1.08175700 |
| C | -0.70024700 | 2.67808000  | 0.17313900  |
| H | -1.78154200 | 4.11233500  | 2.53993400  |
| H | -4.17094400 | 4.74690000  | 2.64020000  |
| H | -5.70499100 | 4.22208300  | 0.76802300  |
| H | -4.87864400 | 3.05342900  | -1.26174700 |
| H | 0.22189000  | 2.70106100  | 0.73300400  |
| N | -2.19925600 | 2.26034000  | -1.52494300 |
| H | -1.62854100 | 0.99376200  | -2.88572200 |
| C | 0.00432100  | 1.28808300  | -1.94281700 |
| O | -0.79667700 | 0.48519600  | -2.80898400 |
| C | 1.05462500  | 2.08098500  | -2.77969200 |
| C | 2.43040800  | 1.39770600  | -2.59067600 |
| H | 0.73766100  | 2.01877500  | -3.82296700 |
| H | 2.94354300  | 1.27809300  | -3.54959100 |
| C | 3.37455800  | 2.11749700  | -1.64828000 |
| C | 4.75159600  | 1.89558400  | -1.76248400 |
| C | 2.92425900  | 2.94948500  | -0.61951600 |
| C | 5.65007100  | 2.47237100  | -0.87102500 |

|   |            |            |             |
|---|------------|------------|-------------|
| H | 5.11799600 | 1.24580600 | -2.55373800 |
| C | 3.82059600 | 3.52551400 | 0.28164200  |
| H | 1.86428700 | 3.16683700 | -0.51935600 |
| C | 5.18609900 | 3.28623000 | 0.16126900  |
| H | 6.71361500 | 2.28470700 | -0.98072800 |
| H | 3.44583100 | 4.16863800 | 1.07250100  |
| H | 5.88465200 | 3.73573200 | 0.85966500  |

M6RS

|   |            |             |             |
|---|------------|-------------|-------------|
| C | 4.74287000 | 1.52363500  | 2.10767900  |
| C | 3.38380300 | 1.25650900  | 1.95415200  |
| C | 2.47631600 | 1.50080600  | 2.98038800  |
| C | 2.95593100 | 2.02886300  | 4.17714500  |
| C | 4.31565200 | 2.30720900  | 4.33467000  |
| C | 5.21758100 | 2.05813500  | 3.30213400  |
| C | 5.51104200 | 1.16087800  | 0.86280400  |
| C | 4.53612000 | 0.30840900  | 0.02311300  |
| C | 3.11213500 | 0.67227900  | 0.58256700  |
| H | 1.42035100 | 1.28641900  | 2.84828100  |
| H | 2.26781800 | 2.22396500  | 4.99303200  |
| H | 4.67427000 | 2.71530400  | 5.27422900  |
| H | 6.27539100 | 2.26626100  | 3.43140300  |
| H | 6.42597800 | 0.59682200  | 1.06419000  |
| H | 4.58490000 | 0.53920900  | -1.04057500 |
| H | 5.79555100 | 2.06049400  | 0.30659000  |
| H | 2.60054300 | 1.36441100  | -0.09342200 |
| N | 2.28196100 | -0.53169600 | 0.67999900  |
| O | 4.85091100 | -1.07841000 | 0.09614100  |
| C | 0.97424000 | -0.72895900 | 0.47492500  |
| C | 2.81922900 | -1.73960000 | 1.01391400  |

|   |             |             |             |
|---|-------------|-------------|-------------|
| N | 0.75501200  | -2.01761400 | 0.72051800  |
| N | 1.90683500  | -2.67030600 | 1.04613900  |
| C | 4.30187400  | -1.79333400 | 1.18295000  |
| H | 4.58915800  | -1.36770200 | 2.15427600  |
| H | 4.65325500  | -2.82304000 | 1.12387600  |
| C | -0.49700700 | -2.72743200 | 0.70054300  |
| C | -0.69598300 | -3.65196600 | -0.33178000 |
| C | -1.44029900 | -2.45869500 | 1.69342800  |
| C | -1.90450500 | -4.34097500 | -0.33278200 |
| C | -2.63451500 | -3.17921200 | 1.64242100  |
| C | -2.87740700 | -4.12509100 | 0.64853900  |
| H | -2.09300900 | -5.06390700 | -1.12262900 |
| H | -3.39531800 | -2.98588300 | 2.39350900  |
| C | -1.20729100 | -1.42102400 | 2.76110900  |
| H | -1.45953000 | -0.41679400 | 2.39761500  |
| H | -0.16808200 | -1.40747100 | 3.10227700  |
| H | -1.84897900 | -1.61629800 | 3.62186600  |
| C | -4.15750600 | -4.91760000 | 0.63179700  |
| H | -4.59925000 | -4.92467400 | -0.36847600 |
| H | -4.88793800 | -4.50021100 | 1.32742900  |
| H | -3.96724200 | -5.95802200 | 0.91398700  |
| C | 0.34304400  | -3.85362400 | -1.40211100 |
| H | 1.24249900  | -4.32223100 | -0.99095100 |
| H | 0.63597900  | -2.88858200 | -1.83473200 |
| H | -0.04887300 | -4.49667700 | -2.19172600 |
| C | -0.02515000 | 0.37220500  | 0.22292600  |
| O | 0.22878800  | 1.44496800  | 0.73148600  |
| C | -1.21220700 | 0.12111400  | -0.65328500 |
| C | -2.47727500 | 0.84380900  | -0.12383600 |
| H | -1.35947100 | -0.94877500 | -0.80072600 |

|   |             |             |             |
|---|-------------|-------------|-------------|
| H | -2.19417600 | 1.41762300  | 0.76595300  |
| C | -3.61432700 | -0.07901200 | 0.23953400  |
| C | -4.24044400 | 0.01732800  | 1.48285300  |
| C | -4.08943800 | -1.01423600 | -0.68733200 |
| C | -5.31869900 | -0.80697800 | 1.80298700  |
| H | -3.88380700 | 0.74986800  | 2.20326100  |
| C | -5.16652000 | -1.83478000 | -0.37204300 |
| H | -3.60629000 | -1.08509500 | -1.66085400 |
| C | -5.78431900 | -1.73476000 | 0.87534500  |
| H | -5.79618200 | -0.71827500 | 2.77398400  |
| H | -5.52945900 | -2.55383500 | -1.10044200 |
| H | -6.62749000 | -2.37400800 | 1.11879400  |
| H | -0.88138700 | 2.77815000  | -1.33481300 |
| C | 2.43843400  | -0.32006300 | -2.67221700 |
| C | 2.66879200  | 1.05669600  | -3.01496900 |
| C | 3.94111200  | 1.45653400  | -3.46790900 |
| C | 4.94779000  | 0.50986400  | -3.57773800 |
| C | 4.71844600  | -0.84108300 | -3.23059900 |
| C | 3.47965900  | -1.26043300 | -2.77591300 |
| C | 0.55920200  | 0.70509800  | -2.38481000 |
| C | 1.41733100  | 1.71058000  | -2.80603700 |
| H | 4.13107200  | 2.49267400  | -3.73803800 |
| H | 5.93050300  | 0.80783200  | -3.93184200 |
| H | 5.53083500  | -1.55687600 | -3.31533900 |
| H | 3.30394700  | -2.29825800 | -2.50091100 |
| H | 1.17539400  | 2.75219200  | -2.97121500 |
| N | 1.14332800  | -0.52498500 | -2.28167800 |
| H | -1.09951500 | -0.74227000 | -3.23402800 |
| C | -0.90519800 | 0.76364900  | -2.06255300 |
| O | -1.65032100 | 0.02781700  | -3.02561600 |



|   |             |            |             |
|---|-------------|------------|-------------|
| C | -1.53259800 | 2.14488900 | -1.94707800 |
| C | -2.86072400 | 1.87690100 | -1.22859100 |
| H | -1.65833200 | 2.61060800 | -2.92770100 |
| H | -3.53265500 | 1.37965000 | -1.93686400 |
| C | -3.55891900 | 3.09122400 | -0.66680500 |
| C | -4.89585200 | 3.35159300 | -0.97172600 |
| C | -2.88703900 | 3.96417500 | 0.19714900  |
| C | -5.54714600 | 4.46253900 | -0.43772700 |
| H | -5.43055900 | 2.67544400 | -1.63390200 |
| C | -3.53247100 | 5.07457100 | 0.73084900  |
| H | -1.84905400 | 3.76709600 | 0.45776400  |
| C | -4.86666600 | 5.32840000 | 0.41317400  |
| H | -6.58698100 | 4.65002000 | -0.68698000 |
| H | -2.99468000 | 5.74299000 | 1.39613900  |
| H | -5.37072100 | 6.19486200 | 0.82925600  |

M6SR

|   |             |             |             |
|---|-------------|-------------|-------------|
| C | -4.89450700 | -1.35689200 | 1.07544400  |
| C | -3.65442900 | -1.03383300 | 0.52710200  |
| C | -3.53686900 | -0.43328300 | -0.71913200 |
| C | -4.70718200 | -0.15117500 | -1.42165400 |
| C | -5.95469800 | -0.46612800 | -0.88054300 |
| C | -6.05933800 | -1.07190000 | 0.37166900  |
| C | -4.73425000 | -1.99669100 | 2.43184700  |
| C | -3.24695900 | -2.39234700 | 2.49587200  |
| C | -2.54431100 | -1.42556200 | 1.47898100  |
| H | -2.56478900 | -0.17809200 | -1.13429800 |
| H | -4.64043600 | 0.33537400  | -2.38894600 |
| H | -6.85497900 | -0.23692900 | -1.44181400 |
| H | -7.03130600 | -1.32083400 | 0.78668200  |

|   |             |             |             |
|---|-------------|-------------|-------------|
| H | -5.36359400 | -2.87767200 | 2.58353800  |
| H | -2.82391200 | -2.27735000 | 3.49397100  |
| H | -4.96588700 | -1.28211100 | 3.22911100  |
| H | -2.09555400 | -0.56519700 | 1.98023200  |
| N | -1.47059900 | -2.14900600 | 0.78830400  |
| O | -3.04808700 | -3.76761100 | 2.17872700  |
| C | -0.23852900 | -1.79459300 | 0.40320300  |
| C | -1.67846600 | -3.42261900 | 0.34077300  |
| N | 0.25559400  | -2.84506400 | -0.25003100 |
| N | -0.62993200 | -3.87675300 | -0.28750200 |
| C | -2.93168900 | -4.09339800 | 0.80402200  |
| H | -3.79792500 | -3.76507000 | 0.21771300  |
| H | -2.82763500 | -5.17505000 | 0.72490100  |
| C | 1.57064500  | -2.98862300 | -0.82061600 |
| C | 2.68279800  | -2.96410500 | 0.02733800  |
| C | 1.65856900  | -3.13792500 | -2.21028700 |
| C | 3.93750200  | -3.04983500 | -0.57793700 |
| C | 2.93682100  | -3.21868300 | -2.75491700 |
| C | 4.08443900  | -3.16333300 | -1.95911500 |
| H | 4.82016200  | -3.02859000 | 0.05602900  |
| H | 3.03895600  | -3.32446000 | -3.83185000 |
| C | 0.43229400  | -3.22361500 | -3.07765200 |
| H | -0.31414600 | -2.48975300 | -2.76732600 |
| H | -0.01642000 | -4.21906200 | -3.01116300 |
| H | 0.69558800  | -3.03292900 | -4.11908400 |
| C | 5.45361400  | -3.20592800 | -2.58406200 |
| H | 5.76903900  | -2.19922200 | -2.87708100 |
| H | 5.45918100  | -3.82737400 | -3.48207400 |
| H | 6.19499500  | -3.59654800 | -1.88406000 |
| C | 2.58251500  | -2.82459500 | 1.52513400  |

|   |             |             |             |
|---|-------------|-------------|-------------|
| H | 2.66947200  | -1.77485500 | 1.83310000  |
| H | 3.40655900  | -3.36157200 | 1.99862800  |
| H | 1.64594600  | -3.22504600 | 1.92137500  |
| C | 0.48458100  | -0.54229100 | 0.87047100  |
| O | 0.33803100  | -0.27178300 | 2.04032600  |
| C | 1.32031000  | 0.20835600  | -0.11295500 |
| C | 2.11358200  | 1.36839100  | 0.49640600  |
| H | 2.00738500  | -0.50850900 | -0.58369300 |
| H | 1.45362400  | 1.91370600  | 1.17752500  |
| C | 3.31147500  | 0.87900500  | 1.27654900  |
| C | 3.36438700  | 1.02651700  | 2.66408500  |
| C | 4.35673400  | 0.20472600  | 0.63291900  |
| C | 4.43281200  | 0.51055300  | 3.39565800  |
| H | 2.55259600  | 1.53912700  | 3.17261900  |
| C | 5.42453900  | -0.31183800 | 1.36009600  |
| H | 4.32977800  | 0.06914100  | -0.44725500 |
| C | 5.46439500  | -0.16208700 | 2.74612800  |
| H | 4.45661500  | 0.63295600  | 4.47386800  |
| H | 6.22689100  | -0.83126800 | 0.84460900  |
| H | 6.29606800  | -0.56623000 | 3.31429100  |
| H | 1.13440900  | 2.50717200  | -2.52544800 |
| C | -2.56821900 | 2.57352600  | -1.37595500 |
| C | -2.46456100 | 2.59296500  | 0.05385200  |
| C | -3.48328200 | 3.19280800  | 0.81882100  |
| C | -4.57074700 | 3.75481000  | 0.17326000  |
| C | -4.66751000 | 3.73757800  | -1.23764700 |
| C | -3.68070400 | 3.15593900  | -2.01304900 |
| C | -0.72857400 | 1.55800300  | -0.89250300 |
| C | -1.24877300 | 1.91276400  | 0.35278900  |
| H | -3.41963400 | 3.21318200  | 1.90464300  |

|   |             |             |             |
|---|-------------|-------------|-------------|
| H | -5.36225700 | 4.22062100  | 0.75367600  |
| H | -5.53167000 | 4.19098000  | -1.71542600 |
| H | -3.75461300 | 3.13893600  | -3.09787100 |
| H | -0.81103600 | 1.76582500  | 1.33038400  |
| N | -1.50099300 | 1.93624300  | -1.94476900 |
| H | -0.59331700 | 0.14165300  | -2.66983100 |
| C | 0.52361200  | 0.81209500  | -1.28321100 |
| O | 0.15297000  | -0.23552200 | -2.17093000 |
| C | 1.59233000  | 1.73724400  | -1.90117800 |
| C | 2.43288500  | 2.29637500  | -0.73201200 |
| H | 2.22339400  | 1.11030100  | -2.54001600 |
| H | 3.49436500  | 2.18285300  | -0.97365500 |
| C | 2.21393500  | 3.75145000  | -0.37005700 |
| C | 3.24231700  | 4.43921100  | 0.28331600  |
| C | 1.00581600  | 4.41697100  | -0.60388200 |
| C | 3.07555800  | 5.75819100  | 0.69531500  |
| H | 4.18548100  | 3.92962000  | 0.46880800  |
| C | 0.83936700  | 5.73869300  | -0.19407200 |
| H | 0.18622400  | 3.90401200  | -1.10091200 |
| C | 1.86957100  | 6.41373300  | 0.45659700  |
| H | 3.88778200  | 6.27427500  | 1.19801200  |
| H | -0.10463700 | 6.24047500  | -0.38341300 |
| H | 1.73461300  | 7.44316400  | 0.77324800  |

M6SS

|   |             |             |             |
|---|-------------|-------------|-------------|
| C | -0.21845800 | -0.15176300 | -1.27983200 |
| O | -0.34894600 | -0.57016800 | -2.41103800 |
| C | 0.84972100  | -0.61074200 | -0.33015100 |
| C | 2.17175700  | -1.00912300 | -1.03566600 |
| H | 1.03724800  | 0.15856100  | 0.42329100  |

|   |             |             |             |
|---|-------------|-------------|-------------|
| H | 1.95297400  | -1.21861100 | -2.08603900 |
| C | 3.19985400  | 0.09907300  | -0.98381300 |
| C | 3.60958200  | 0.73741800  | -2.15561200 |
| C | 3.79246300  | 0.48191600  | 0.22533100  |
| C | 4.59604700  | 1.72335500  | -2.12856600 |
| H | 3.16074300  | 0.44728700  | -3.10317900 |
| C | 4.79467300  | 1.44388600  | 0.25452500  |
| H | 3.48520600  | 0.00116600  | 1.15125500  |
| C | 5.20178100  | 2.06853400  | -0.92434300 |
| H | 4.90143700  | 2.20646700  | -3.05173700 |
| H | 5.25565400  | 1.71363900  | 1.20034700  |
| H | 5.98538900  | 2.82016900  | -0.90127500 |
| H | 2.11841300  | -1.78099300 | 1.72547900  |
| C | -2.50516800 | -0.64969700 | 2.08214000  |
| C | -1.93041600 | -1.22710600 | 3.26494700  |
| C | -2.60384900 | -1.09758100 | 4.49464100  |
| C | -3.80139300 | -0.40366700 | 4.54398100  |
| C | -4.35109600 | 0.18279200  | 3.38192400  |
| C | -3.71305800 | 0.06550000  | 2.15949900  |
| C | -0.62964700 | -1.53345100 | 1.48106100  |
| C | -0.69515000 | -1.80352000 | 2.84106000  |
| H | -2.18583400 | -1.53077800 | 5.40053400  |
| H | -4.32451700 | -0.29872000 | 5.49012400  |
| H | -5.28488400 | 0.73325500  | 3.45322500  |
| H | -4.12066100 | 0.53111800  | 1.26503100  |
| H | 0.02752100  | -2.34546500 | 3.43694000  |
| N | -1.70305500 | -0.85110900 | 0.99646400  |
| H | -1.10379700 | -2.71628200 | -0.42552300 |
| C | 0.39450500  | -1.89873600 | 0.45637400  |
| O | -0.14387500 | -2.84586900 | -0.45524400 |

|   |             |             |             |
|---|-------------|-------------|-------------|
| C | 1.73762500  | -2.43374300 | 0.93090700  |
| C | 2.59780900  | -2.35997900 | -0.33563800 |
| H | 1.64162500  | -3.44778500 | 1.32837400  |
| H | 2.23297600  | -3.15416500 | -0.99644700 |
| C | 4.08507200  | -2.57172900 | -0.16924100 |
| C | 4.90588300  | -2.55443600 | -1.30433900 |
| C | 4.67903800  | -2.79167000 | 1.07364000  |
| C | 6.27917600  | -2.73650700 | -1.19920700 |
| H | 4.45644800  | -2.38651200 | -2.28073500 |
| C | 6.05758400  | -2.97798300 | 1.18420400  |
| H | 4.06738500  | -2.81890300 | 1.97042000  |
| C | 6.86255500  | -2.94684200 | 0.05088900  |
| H | 6.89680900  | -2.71527800 | -2.09173100 |
| H | 6.49988000  | -3.14598300 | 2.16137300  |
| H | 7.93514700  | -3.08867500 | 0.13681500  |
| C | -4.74864100 | -1.33733600 | -1.22319900 |
| C | -3.49347900 | -1.25567500 | -1.83210200 |
| C | -2.72675500 | -2.39835500 | -2.03770500 |
| C | -3.19146000 | -3.61277900 | -1.53339400 |
| C | -4.41212300 | -3.68170300 | -0.85858600 |
| C | -5.20924800 | -2.54848400 | -0.71903300 |
| C | -5.47344700 | -0.02010000 | -1.28944700 |
| C | -4.68418300 | 0.71371900  | -2.39422600 |
| C | -3.23508000 | 0.15603600  | -2.30633900 |
| H | -1.78400900 | -2.34847000 | -2.57031100 |
| H | -2.60097200 | -4.51271400 | -1.67430900 |
| H | -4.75742800 | -4.63376500 | -0.46898900 |
| H | -6.18175500 | -2.61278100 | -0.24089200 |
| H | -5.42839100 | 0.50230800  | -0.32845100 |
| H | -5.06887900 | 0.39856200  | -3.36671500 |

|   |             |             |             |
|---|-------------|-------------|-------------|
| H | -6.52863300 | -0.12358300 | -1.55115200 |
| H | -2.69773300 | 0.21582500  | -3.25293400 |
| N | -2.47805900 | 1.01599800  | -1.34452900 |
| O | -4.76645500 | 2.12062800  | -2.39635400 |
| C | -1.22220700 | 0.89976000  | -0.86274900 |
| C | -2.95935800 | 2.20528800  | -0.85979700 |
| N | -0.98177700 | 2.00800300  | -0.17114000 |
| N | -2.06769000 | 2.82846600  | -0.14620400 |
| C | -4.32509500 | 2.71418200  | -1.19831200 |
| H | -5.01473700 | 2.53039600  | -0.36558300 |
| H | -4.26859600 | 3.79092300  | -1.36262600 |
| C | 0.27166500  | 2.52452600  | 0.32319500  |
| C | 0.50839100  | 2.52634800  | 1.69822700  |
| C | 1.14445100  | 3.08612200  | -0.61661700 |
| C | 1.69208100  | 3.12737400  | 2.12920600  |
| C | 2.30282600  | 3.68143900  | -0.12934800 |
| C | 2.58919700  | 3.71413500  | 1.23714100  |
| H | 1.91116700  | 3.14027700  | 3.19403300  |
| H | 3.00581000  | 4.11596300  | -0.83470500 |
| C | 0.84718000  | 3.04627300  | -2.09293500 |
| H | -0.17737200 | 3.36697800  | -2.30707800 |
| H | 0.97832400  | 2.03626200  | -2.49763300 |
| H | 1.53167000  | 3.70223900  | -2.63276700 |
| C | 3.84018500  | 4.38838200  | 1.73438600  |
| H | 3.65223500  | 5.44842300  | 1.93363800  |
| H | 4.63791000  | 4.32390500  | 0.99021500  |
| H | 4.19255100  | 3.93350700  | 2.66322600  |
| C | -0.43536400 | 1.86846100  | 2.66546700  |
| H | -0.24890500 | 0.78810500  | 2.70982900  |
| H | -1.48010400 | 1.99718200  | 2.37309600  |

|   |             |            |            |
|---|-------------|------------|------------|
| H | -0.29760000 | 2.27984700 | 3.66724600 |
|---|-------------|------------|------------|

TS7RR

|   |             |             |             |
|---|-------------|-------------|-------------|
| C | -5.06611800 | -2.37886300 | -0.47697700 |
| C | -3.73068400 | -2.02782700 | -0.65343800 |
| C | -2.74820600 | -2.98869700 | -0.87887800 |
| C | -3.13000500 | -4.32687400 | -0.91841100 |
| C | -4.46893400 | -4.68760200 | -0.74318900 |
| C | -5.44539800 | -3.71838300 | -0.52559900 |
| C | -5.93154600 | -1.16517300 | -0.25811600 |
| C | -4.94733700 | 0.01342300  | -0.07385800 |
| C | -3.54479400 | -0.53018600 | -0.54413200 |
| H | -1.71502700 | -2.69384100 | -1.03797600 |
| H | -2.38207400 | -5.09418900 | -1.08962900 |
| H | -4.75066300 | -5.73522500 | -0.77582200 |
| H | -6.48429700 | -4.00272100 | -0.38823800 |
| H | -6.58150100 | -1.24890800 | 0.61867100  |
| H | -5.22488000 | 0.87342900  | -0.68345800 |
| H | -6.57863800 | -0.98435000 | -1.12177400 |
| H | -3.23304100 | -0.07668800 | -1.48316400 |
| N | -2.50461100 | -0.21777900 | 0.45395700  |
| O | -4.95021200 | 0.51638400  | 1.25489800  |
| C | -1.18413900 | 0.01468800  | 0.33087400  |
| C | -2.80481900 | -0.18704600 | 1.78680300  |
| N | -0.73707200 | 0.16304600  | 1.58585100  |
| N | -1.74799800 | 0.05027900  | 2.50170600  |
| C | -4.24144100 | -0.28748700 | 2.17867600  |
| H | -4.58239300 | -1.33132700 | 2.16195700  |
| H | -4.38912700 | 0.12443800  | 3.17628900  |
| C | 0.59615900  | 0.32855100  | 2.12343400  |

S200



|   |             |             |             |
|---|-------------|-------------|-------------|
| C | 1.18099600  | -0.78977800 | 2.72888800  |
| C | 1.16593000  | 1.60740200  | 2.17758500  |
| C | 2.43740800  | -0.61957900 | 3.31496300  |
| C | 2.41846200  | 1.71817600  | 2.77839300  |
| C | 3.06729000  | 0.62362200  | 3.35171500  |
| H | 2.91151100  | -1.47552700 | 3.78859200  |
| H | 2.88098600  | 2.70061000  | 2.83411100  |
| C | 0.46516600  | 2.83651800  | 1.66950500  |
| H | -0.62135200 | 2.73280500  | 1.70411000  |
| H | 0.74005100  | 3.06201200  | 0.63371200  |
| H | 0.74835400  | 3.69424900  | 2.28305500  |
| C | 4.38229600  | 0.81490600  | 4.06227000  |
| H | 4.22741400  | 1.34497900  | 5.00710300  |
| H | 5.07061600  | 1.41224300  | 3.45853500  |
| H | 4.85758700  | -0.14216500 | 4.28908000  |
| C | 0.45459200  | -2.09981800 | 2.88949400  |
| H | 1.16503100  | -2.92765400 | 2.91476900  |
| H | -0.27255000 | -2.29154700 | 2.09741500  |
| H | -0.09578900 | -2.09210200 | 3.83589800  |
| C | -0.52820000 | 0.09266500  | -1.05608100 |
| O | -1.12421000 | -0.52919500 | -1.95425800 |
| C | 0.96203300  | 0.34892400  | -1.20619400 |
| C | 1.87085000  | -0.70332000 | -1.86374000 |
| H | 1.38730000  | 0.71248700  | -0.26618800 |
| H | 1.37651800  | -0.93992100 | -2.81079600 |
| C | 2.11271600  | -2.04206400 | -1.20871100 |
| C | 1.21250200  | -2.58408800 | -0.29245700 |
| C | 3.18533500  | -2.84281400 | -1.62396800 |
| C | 1.36126000  | -3.88417400 | 0.19068300  |
| H | 0.36698400  | -1.99112100 | 0.04073500  |

|   |             |             |             |
|---|-------------|-------------|-------------|
| C | 3.34880100  | -4.13395000 | -1.13527300 |
| H | 3.90308400  | -2.44780300 | -2.33724800 |
| C | 2.43321500  | -4.66465000 | -0.22677200 |
| H | 0.63340200  | -4.28462300 | 0.89020400  |
| H | 4.19184600  | -4.73116700 | -1.46841700 |
| H | 2.55494700  | -5.67520200 | 0.14900600  |
| H | 2.97994800  | 2.19513000  | -1.44532100 |
| C | -1.69028900 | 3.07698300  | -0.73849700 |
| C | -1.07412600 | 4.30473900  | -1.14620800 |
| C | -1.70795200 | 5.52553400  | -0.85439800 |
| C | -2.90962700 | 5.51915100  | -0.16727900 |
| C | -3.49803600 | 4.30667800  | 0.24711700  |
| C | -2.90407300 | 3.08642000  | -0.02974000 |
| C | 0.20625400  | 2.57558500  | -1.74063600 |
| C | 0.15165500  | 3.94934000  | -1.79632200 |
| H | -1.25567600 | 6.46378600  | -1.16536600 |
| H | -3.40585000 | 6.45720000  | 0.06184800  |
| H | -4.43498600 | 4.32773300  | 0.79562300  |
| H | -3.37168800 | 2.16950200  | 0.31420100  |
| H | 0.87831200  | 4.61340600  | -2.24353900 |
| N | -0.88632700 | 2.03338600  | -1.12206800 |
| H | -0.19065200 | 0.67413600  | -3.42823800 |
| C | 1.11070100  | 1.49959600  | -2.24434600 |
| O | 0.68340100  | 1.08401800  | -3.53960100 |
| C | 2.62084200  | 1.63430400  | -2.31382200 |
| C | 3.13157800  | 0.15287400  | -2.25609200 |
| H | 2.94361500  | 2.15014300  | -3.22073100 |
| H | 3.45065000  | -0.14814300 | -3.25825900 |
| C | 4.33309100  | 0.03215500  | -1.34237100 |
| C | 5.61546800  | 0.14720900  | -1.88560500 |

|   |            |             |             |
|---|------------|-------------|-------------|
| C | 4.21173100 | -0.16096800 | 0.03836600  |
| C | 6.74986700 | 0.06963500  | -1.08039600 |
| H | 5.72498100 | 0.29359000  | -2.95770100 |
| C | 5.34348300 | -0.26050400 | 0.84214200  |
| H | 3.23037200 | -0.27372900 | 0.49545700  |
| C | 6.61728200 | -0.14189200 | 0.28884100  |
| H | 7.73536200 | 0.16280200  | -1.52614200 |
| H | 5.22689500 | -0.44902600 | 1.90430000  |
| H | 7.49717400 | -0.21991800 | 0.91945400  |

TS7RS

|   |             |             |             |
|---|-------------|-------------|-------------|
| C | -4.45055000 | 2.43598500  | -1.76146100 |
| C | -3.16099000 | 2.06018300  | -1.39310500 |
| C | -2.04333400 | 2.72487800  | -1.89064300 |
| C | -2.24079300 | 3.78541500  | -2.77097400 |
| C | -3.53226500 | 4.17128600  | -3.13981300 |
| C | -4.64469000 | 3.50125500  | -2.63731700 |
| C | -5.48818900 | 1.56801300  | -1.10023600 |
| C | -4.69804100 | 0.41193200  | -0.44785000 |
| C | -3.19191600 | 0.87831200  | -0.44611500 |
| H | -1.04640000 | 2.42310600  | -1.58653000 |
| H | -1.38482500 | 4.31726800  | -3.17330500 |
| H | -3.66901300 | 4.99827000  | -3.82921700 |
| H | -5.64730700 | 3.79815900  | -2.92987300 |
| H | -6.22756600 | 1.16816800  | -1.80103800 |
| H | -5.01867400 | 0.22132300  | 0.57628000  |
| H | -6.03747900 | 2.12672800  | -0.33602200 |
| H | -2.85402000 | 1.12794800  | 0.56065000  |
| N | -2.32053100 | -0.20106900 | -0.93478000 |
| O | -4.90872800 | -0.82725900 | -1.11307600 |

|   |             |             |             |
|---|-------------|-------------|-------------|
| C | -1.05207000 | -0.53055500 | -0.63441000 |
| C | -2.74063400 | -1.06111200 | -1.91022500 |
| N | -0.74741500 | -1.54177600 | -1.44306100 |
| N | -1.80188300 | -1.89814700 | -2.24000600 |
| C | -4.17654500 | -0.98812400 | -2.31385300 |
| H | -4.34609800 | -0.15999300 | -3.01502100 |
| H | -4.48661500 | -1.92285300 | -2.77979700 |
| C | 0.50813200  | -2.22466200 | -1.61505100 |
| C | 1.44633000  | -1.66127500 | -2.47870700 |
| C | 0.69791800  | -3.43075000 | -0.93650100 |
| C | 2.63014100  | -2.37004300 | -2.67488800 |
| C | 1.90266900  | -4.09211700 | -1.15703500 |
| C | 2.87091700  | -3.58144000 | -2.02805400 |
| H | 3.38780300  | -1.95478400 | -3.33323100 |
| H | 2.09036800  | -5.02954900 | -0.63926800 |
| C | -0.35398500 | -3.94909300 | 0.00756400  |
| H | -0.02029600 | -4.87077500 | 0.48604600  |
| H | -1.28936600 | -4.15406500 | -0.52296300 |
| H | -0.57700800 | -3.20688200 | 0.78460900  |
| C | 4.14904500  | -4.34012100 | -2.26922900 |
| H | 4.89935200  | -3.70380400 | -2.74299200 |
| H | 3.96752900  | -5.20090500 | -2.92099100 |
| H | 4.56146100  | -4.71952300 | -1.33049500 |
| C | 1.18773300  | -0.34000200 | -3.15164500 |
| H | 1.14016300  | 0.47271900  | -2.41662100 |
| H | 0.23908800  | -0.34915700 | -3.69765400 |
| H | 1.99184700  | -0.10416300 | -3.85021100 |
| C | -0.24237800 | 0.21725600  | 0.40971200  |
| O | -0.52579500 | 1.41736800  | 0.49599800  |
| C | 1.11760100  | -0.29659500 | 0.88419300  |

|   |             |             |             |
|---|-------------|-------------|-------------|
| C | 2.25250400  | 0.67125500  | 0.44890400  |
| H | 1.28323600  | -1.32424500 | 0.55528300  |
| H | 1.82396800  | 1.43574400  | -0.20756300 |
| C | 3.41604900  | 0.02436100  | -0.26663700 |
| C | 3.95895300  | 0.60473200  | -1.41508600 |
| C | 4.01907500  | -1.12707600 | 0.25212300  |
| C | 5.07344400  | 0.04490200  | -2.03940500 |
| H | 3.50833700  | 1.50836200  | -1.81962200 |
| C | 5.13031400  | -1.68738500 | -0.36767200 |
| H | 3.61634000  | -1.56738300 | 1.16137000  |
| C | 5.66123800  | -1.10466000 | -1.51812800 |
| H | 5.48256300  | 0.50965700  | -2.93144500 |
| H | 5.58636000  | -2.58142000 | 0.04767800  |
| H | 6.52998000  | -1.54195600 | -2.00089200 |
| H | 0.74611000  | 1.85296100  | 2.56126900  |
| C | -2.32057700 | -1.25716800 | 2.46162100  |
| C | -2.16507100 | -1.25685400 | 3.88615500  |
| C | -3.25723500 | -1.62028800 | 4.69628700  |
| C | -4.45516300 | -1.97543800 | 4.10049100  |
| C | -4.58784400 | -2.00280600 | 2.69545500  |
| C | -3.52948400 | -1.66044900 | 1.86988500  |
| C | -0.25530500 | -0.66580400 | 2.89263200  |
| C | -0.81079200 | -0.87455700 | 4.13875100  |
| H | -3.15828700 | -1.62677100 | 5.77876900  |
| H | -5.30290800 | -2.25447100 | 4.71898900  |
| H | -5.53038600 | -2.31299900 | 2.25324300  |
| H | -3.63474100 | -1.72619400 | 0.79017200  |
| H | -0.31952400 | -0.76719800 | 5.09614800  |
| N | -1.13263800 | -0.90053200 | 1.87585100  |
| H | 1.77013500  | -2.02321300 | 2.93428300  |

|   |            |             |            |
|---|------------|-------------|------------|
| C | 1.11288300 | -0.26141600 | 2.44325200 |
| O | 2.11842000 | -1.12228300 | 2.96929600 |
| C | 1.56865800 | 1.16142500  | 2.75800300 |
| C | 2.71947100 | 1.38675300  | 1.76545700 |
| H | 1.88089000 | 1.25761000  | 3.80130200 |
| H | 3.59415100 | 0.84380300  | 2.13966000 |
| C | 3.10713000 | 2.82823100  | 1.54492900 |
| C | 4.41710100 | 3.25741200  | 1.76184000 |
| C | 2.16039000 | 3.75937900  | 1.09829900 |
| C | 4.77870800 | 4.58707900  | 1.54824900 |
| H | 5.16031300 | 2.54122800  | 2.10300900 |
| C | 2.51790600 | 5.08661400  | 0.88486200 |
| H | 1.13907300 | 3.43070600  | 0.91306800 |
| C | 3.82936000 | 5.50558700  | 1.11070500 |
| H | 5.80253100 | 4.90297800  | 1.72361100 |
| H | 1.77307200 | 5.79733100  | 0.53977900 |
| H | 4.10700900 | 6.54156200  | 0.94380900 |

TS7SR

|   |             |             |             |
|---|-------------|-------------|-------------|
| C | -5.15324300 | -0.20873500 | 0.80914000  |
| C | -3.85406600 | 0.24182200  | 1.05583000  |
| C | -3.48865300 | 0.75349300  | 2.29497800  |
| C | -4.44452600 | 0.77002600  | 3.31230400  |
| C | -5.73276300 | 0.28777600  | 3.08324900  |
| C | -6.09831300 | -0.19903500 | 1.82706600  |
| C | -5.30620500 | -0.60356500 | -0.64139000 |
| C | -4.12813100 | 0.10947700  | -1.32307500 |
| C | -3.04006900 | 0.10891900  | -0.22039700 |
| H | -2.49066800 | 1.14798700  | 2.46291400  |
| H | -4.18350600 | 1.16976700  | 4.28662700  |

|   |             |             |             |
|---|-------------|-------------|-------------|
| H | -6.46469000 | 0.31187600  | 3.88414100  |
| H | -7.11160700 | -0.54283700 | 1.64264700  |
| H | -6.25825800 | -0.30198600 | -1.08374000 |
| H | -3.78148800 | -0.40743700 | -2.22055600 |
| H | -5.19298500 | -1.68750500 | -0.77165600 |
| H | -2.47713600 | -0.81816400 | -0.24165300 |
| N | -2.12887200 | 1.23394500  | -0.43213000 |
| O | -4.46937800 | 1.43455900  | -1.74059100 |
| C | -0.79767900 | 1.41450500  | -0.41798800 |
| C | -2.70425800 | 2.47092500  | -0.58151400 |
| N | -0.63125900 | 2.74014900  | -0.47702100 |
| N | -1.80764600 | 3.41380800  | -0.59054800 |
| C | -4.17683800 | 2.50791100  | -0.86068500 |
| H | -4.75609300 | 2.46347100  | 0.06796300  |
| H | -4.41760500 | 3.43183100  | -1.38728600 |
| C | 0.60553500  | 3.44163900  | -0.23779900 |
| C | 1.34343400  | 3.92152900  | -1.31921000 |
| C | 0.98463700  | 3.60583900  | 1.09950500  |
| C | 2.55084700  | 4.55406900  | -1.02305700 |
| C | 2.19717800  | 4.24941300  | 1.33861800  |
| C | 2.99269900  | 4.72104300  | 0.29064400  |
| H | 3.16007200  | 4.92615900  | -1.84258600 |
| H | 2.52478400  | 4.39100300  | 2.36540300  |
| C | 0.09893800  | 3.13916500  | 2.22728800  |
| H | -0.02947000 | 2.05046000  | 2.23848900  |
| H | -0.89898100 | 3.58190800  | 2.13889000  |
| H | 0.52087600  | 3.43851800  | 3.18746100  |
| C | 4.29108600  | 5.42703000  | 0.58432600  |
| H | 4.92277600  | 5.48071600  | -0.30497100 |
| H | 4.84478800  | 4.91453400  | 1.37525500  |

|   |             |             |             |
|---|-------------|-------------|-------------|
| H | 4.10320700  | 6.45007900  | 0.92511600  |
| C | 0.84526000  | 3.76687200  | -2.72919400 |
| H | 0.70721800  | 2.70938600  | -2.96750600 |
| H | 1.55415400  | 4.20093500  | -3.43530100 |
| H | -0.11937900 | 4.26850000  | -2.85294700 |
| C | 0.46590800  | 0.53022900  | -0.64730600 |
| O | 1.02370400  | 0.77140100  | -1.69150800 |
| C | 1.10796100  | -0.15112100 | 0.52823800  |
| C | 2.33168400  | -0.98690900 | 0.16573600  |
| H | 1.38234600  | 0.65137500  | 1.23350800  |
| H | 2.01381100  | -1.67266600 | -0.62918900 |
| C | 3.56746200  | -0.25300000 | -0.30295000 |
| C | 4.57419300  | -0.98265100 | -0.94688300 |
| C | 3.76776700  | 1.11463100  | -0.09568000 |
| C | 5.75513700  | -0.36953000 | -1.35431300 |
| H | 4.42217100  | -2.04268500 | -1.13324300 |
| C | 4.94764700  | 1.73139800  | -0.50746600 |
| H | 2.99777400  | 1.72516600  | 0.37018700  |
| C | 5.94838000  | 0.99240200  | -1.13209400 |
| H | 6.52175900  | -0.95425700 | -1.85328700 |
| H | 5.07690800  | 2.79774500  | -0.34529200 |
| H | 6.86586600  | 1.47500000  | -1.45374300 |
| H | 0.86849900  | -2.91525100 | 2.36427600  |
| C | -1.50323200 | -2.39887700 | -1.57321300 |
| C | -2.04700000 | -3.33486500 | -0.63195100 |
| C | -3.03693900 | -4.24619300 | -1.05547600 |
| C | -3.47358000 | -4.20521000 | -2.36716100 |
| C | -2.93634100 | -3.27540400 | -3.28907500 |
| C | -1.95467400 | -2.37908200 | -2.90677700 |
| C | -0.54969900 | -1.98158000 | 0.32653500  |



|   |             |             |             |
|---|-------------|-------------|-------------|
| C | -1.39864900 | -3.04979600 | 0.60656800  |
| H | -3.45746800 | -4.96660600 | -0.35821900 |
| H | -4.23976400 | -4.89863900 | -2.70156000 |
| H | -3.30108300 | -3.27094200 | -4.31195300 |
| H | -1.53835500 | -1.66315600 | -3.61076700 |
| H | -1.53605100 | -3.54952900 | 1.55736800  |
| N | -0.59526600 | -1.57346800 | -0.96665500 |
| H | -1.47866600 | -0.89212300 | 2.25523800  |
| C | 0.20865500  | -1.11848700 | 1.30010800  |
| O | -0.71581500 | -0.33020500 | 2.05716900  |
| C | 1.20049100  | -1.88877300 | 2.18849200  |
| C | 2.57775700  | -1.82509900 | 1.46729800  |
| H | 1.25710800  | -1.38059500 | 3.15490900  |
| H | 3.27314100  | -1.25382600 | 2.09189200  |
| C | 3.20657500  | -3.16553200 | 1.17042400  |
| C | 4.53825100  | -3.42053400 | 1.50087300  |
| C | 2.47418200  | -4.15998200 | 0.51056900  |
| C | 5.13204900  | -4.64076300 | 1.18088800  |
| H | 5.11686200  | -2.65050400 | 2.00493800  |
| C | 3.06355000  | -5.37871200 | 0.19076400  |
| H | 1.43365100  | -3.97078900 | 0.24713700  |
| C | 4.39587800  | -5.62292800 | 0.52485700  |
| H | 6.16962800  | -4.82217100 | 1.44384100  |
| H | 2.48392800  | -6.14039700 | -0.32147000 |
| H | 4.85543300  | -6.57391400 | 0.27480400  |

TS7SS

|   |             |             |             |
|---|-------------|-------------|-------------|
| C | 0.50147300  | -0.03874900 | -1.02487700 |
| O | 1.09022800  | -0.50117500 | -2.03299400 |
| C | -0.89810700 | 0.54386900  | -1.22098800 |

S209

|   |             |             |             |
|---|-------------|-------------|-------------|
| C | -1.92101800 | -0.14754000 | -2.12430100 |
| H | -1.35074600 | 0.80456300  | -0.25844600 |
| H | -1.40017500 | -0.30324500 | -3.07221600 |
| C | -2.42985400 | -1.51087500 | -1.70342000 |
| C | -1.87581300 | -2.62484200 | -2.35140800 |
| C | -3.38740900 | -1.74715300 | -0.70791000 |
| C | -2.27425700 | -3.92273100 | -2.04311400 |
| H | -1.11519200 | -2.46230000 | -3.11070400 |
| C | -3.80475600 | -3.04412000 | -0.41402000 |
| H | -3.81285600 | -0.92673600 | -0.14309600 |
| C | -3.25670400 | -4.13687200 | -1.07925000 |
| H | -1.82504000 | -4.76278300 | -2.56377800 |
| H | -4.56020100 | -3.19711900 | 0.35168400  |
| H | -3.58468200 | -5.14448400 | -0.84362300 |
| H | -2.44017900 | 2.96710500  | -1.44088800 |
| C | 1.99018100  | 2.38937900  | 0.29130100  |
| C | 1.67505000  | 3.78050700  | 0.17414600  |
| C | 2.39388700  | 4.71653700  | 0.93708300  |
| C | 3.38472000  | 4.27356200  | 1.79674100  |
| C | 3.68154400  | 2.90027700  | 1.91062400  |
| C | 2.99874400  | 1.95301100  | 1.16561800  |
| C | 0.30319600  | 2.58792500  | -1.12548800 |
| C | 0.58354800  | 3.87943200  | -0.75099400 |
| H | 2.16867700  | 5.77657100  | 0.85444200  |
| H | 3.94326500  | 4.98930400  | 2.39194200  |
| H | 4.46428000  | 2.57865500  | 2.59079100  |
| H | 3.25302800  | 0.90062600  | 1.25077400  |
| H | 0.08109400  | 4.77714400  | -1.08342700 |
| N | 1.13798900  | 1.68269600  | -0.52081300 |
| H | 0.59141300  | 0.94404600  | -3.16471300 |

|   |             |             |             |
|---|-------------|-------------|-------------|
| C | -0.66786800 | 1.86624400  | -2.00552600 |
| O | -0.09964600 | 1.62021200  | -3.28850100 |
| C | -2.08543800 | 2.34665800  | -2.26631100 |
| C | -2.93562800 | 1.03992400  | -2.40890700 |
| H | -2.11584200 | 2.94954700  | -3.17572400 |
| H | -3.27485300 | 0.92760800  | -3.44238000 |
| C | -4.17445900 | 1.06002400  | -1.53831100 |
| C | -5.36457200 | 0.50681400  | -2.02033000 |
| C | -4.16760000 | 1.57217900  | -0.23592600 |
| C | -6.50739900 | 0.44771500  | -1.22685100 |
| H | -5.38860200 | 0.10385000  | -3.02968400 |
| C | -5.30771300 | 1.51823000  | 0.56130200  |
| H | -3.26169700 | 2.00206200  | 0.18402800  |
| C | -6.48279200 | 0.95179500  | 0.07148200  |
| H | -7.41819300 | 0.01089600  | -1.62441600 |
| H | -5.27505000 | 1.92382000  | 1.56832300  |
| H | -7.37229800 | 0.91410100  | 0.69259000  |
| C | 5.42816900  | -1.46889800 | -0.67160300 |
| C | 4.18004600  | -0.90387700 | -0.92654400 |
| C | 4.06370700  | 0.37753700  | -1.46184200 |
| C | 5.22688600  | 1.10471200  | -1.69746900 |
| C | 6.48032300  | 0.55085900  | -1.42477300 |
| C | 6.59004800  | -0.74196900 | -0.91976100 |
| C | 5.31476500  | -2.88266200 | -0.17170300 |
| C | 3.79770900  | -3.15862200 | -0.04868300 |
| C | 3.06314600  | -1.86814400 | -0.59828600 |
| H | 3.08557100  | 0.79552700  | -1.67807300 |
| H | 5.15681400  | 2.11058200  | -2.09842000 |
| H | 7.37743200  | 1.13091800  | -1.61712700 |
| H | 7.56500100  | -1.17862800 | -0.72452300 |

|   |             |             |             |
|---|-------------|-------------|-------------|
| H | 5.80442800  | -3.03329000 | 0.79639200  |
| H | 3.49954700  | -4.00674000 | -0.66453600 |
| H | 5.77532700  | -3.58765400 | -0.86946600 |
| H | 2.45806800  | -2.10051100 | -1.46997200 |
| N | 2.11000500  | -1.34396400 | 0.41598100  |
| O | 3.42846900  | -3.53542800 | 1.26698500  |
| C | 0.94361600  | -0.67502000 | 0.29440500  |
| C | 2.28511100  | -1.59278800 | 1.75138900  |
| N | 0.44899800  | -0.58379500 | 1.53447800  |
| N | 1.28556100  | -1.15377800 | 2.45301800  |
| C | 3.43078300  | -2.44808200 | 2.17032600  |
| H | 4.37624500  | -1.88949200 | 2.14322900  |
| H | 3.26615000  | -2.83052800 | 3.17696300  |
| C | -0.91428700 | -0.36372900 | 1.97561100  |
| C | -1.70913900 | -1.51695000 | 2.04637300  |
| C | -1.33497100 | 0.88640800  | 2.42802900  |
| C | -2.98807200 | -1.37833400 | 2.57449400  |
| C | -2.63517200 | 0.96885300  | 2.93571300  |
| C | -3.46949200 | -0.14451800 | 3.01965300  |
| H | -3.62448400 | -2.25746600 | 2.64242400  |
| H | -2.99108300 | 1.93207000  | 3.29376000  |
| C | -0.45305800 | 2.10119000  | 2.37192700  |
| H | 0.59295900  | 1.85109700  | 2.56403400  |
| H | -0.77983900 | 2.83642500  | 3.10974100  |
| H | -0.49643900 | 2.57207600  | 1.38226600  |
| C | -4.86067000 | -0.04387900 | 3.58762900  |
| H | -5.60477600 | -0.27744100 | 2.81913100  |
| H | -5.06524400 | 0.95970200  | 3.96695600  |
| H | -4.99702800 | -0.75594300 | 4.40629300  |
| C | -1.19718300 | -2.85167500 | 1.57303200  |

|   |             |             |            |
|---|-------------|-------------|------------|
| H | -0.29317600 | -3.14527100 | 2.11500600 |
| H | -0.96541900 | -2.82495900 | 0.50090300 |
| H | -1.95581500 | -3.62036000 | 1.72126700 |

M7RR

|   |             |             |             |
|---|-------------|-------------|-------------|
| C | -4.61642800 | -2.87539800 | -0.30116200 |
| C | -3.39194200 | -2.27064600 | -0.56910800 |
| C | -2.26288000 | -3.01652600 | -0.89480000 |
| C | -2.37412100 | -4.40413200 | -0.91759700 |
| C | -3.59663000 | -5.02195700 | -0.63655900 |
| C | -4.72672500 | -4.26398000 | -0.33646700 |
| C | -5.68753900 | -1.85166500 | -0.02641600 |
| C | -4.94652400 | -0.49464800 | 0.06408700  |
| C | -3.48130400 | -0.76811900 | -0.44748200 |
| H | -1.33724800 | -2.50739900 | -1.14648400 |
| H | -1.50483600 | -5.00739100 | -1.16062300 |
| H | -3.66843000 | -6.10483300 | -0.65915400 |
| H | -5.67646800 | -4.74842600 | -0.13006600 |
| H | -6.24138700 | -2.03959800 | 0.89934500  |
| H | -5.41263800 | 0.26024700  | -0.57012300 |
| H | -6.42210000 | -1.82717000 | -0.83694100 |
| H | -3.26030600 | -0.26568200 | -1.38681500 |
| N | -2.48308100 | -0.27645800 | 0.53108900  |
| O | -5.00227900 | 0.06470200  | 1.36845900  |
| C | -1.21792900 | 0.17270400  | 0.38002600  |
| C | -2.76680500 | -0.28767100 | 1.86876000  |
| N | -0.79325700 | 0.39466700  | 1.63704500  |
| N | -1.75497000 | 0.12091400  | 2.57039300  |
| C | -4.16224800 | -0.59842900 | 2.29351400  |
| H | -4.34150700 | -1.68183000 | 2.30800800  |

|   |             |             |             |
|---|-------------|-------------|-------------|
| H | -4.35068300 | -0.19002600 | 3.28597600  |
| C | 0.51325500  | 0.74523400  | 2.14303700  |
| C | 1.25616400  | -0.27099700 | 2.75892900  |
| C | 0.93711200  | 2.07916200  | 2.11747300  |
| C | 2.52104100  | 0.06211000  | 3.24469300  |
| C | 2.21716000  | 2.35038700  | 2.60046700  |
| C | 3.03027400  | 1.35718400  | 3.14720400  |
| H | 3.11350600  | -0.71334600 | 3.72486800  |
| H | 2.57152800  | 3.37831500  | 2.57850600  |
| C | 0.05474100  | 3.21104300  | 1.66594600  |
| H | -0.99398100 | 2.91700800  | 1.60083900  |
| H | 0.36119900  | 3.59086200  | 0.68731900  |
| H | 0.13525800  | 4.03270300  | 2.38189900  |
| C | 4.41445500  | 1.69167900  | 3.63610300  |
| H | 4.41764900  | 2.63287400  | 4.19141600  |
| H | 5.09852800  | 1.80433000  | 2.78850500  |
| H | 4.80833800  | 0.90466900  | 4.28325500  |
| C | 0.71029600  | -1.65249500 | 3.01482600  |
| H | 1.50168000  | -2.39767200 | 2.91402700  |
| H | -0.10724000 | -1.92583900 | 2.34604500  |
| H | 0.32096100  | -1.70213700 | 4.03669400  |
| C | -0.62848900 | 0.44478000  | -1.09068200 |
| O | -1.26133000 | -0.24635600 | -1.95813100 |
| C | 0.92686800  | 0.47474700  | -1.18168200 |
| C | 1.80043800  | -0.59911900 | -1.83502100 |
| H | 1.33660500  | 0.74895300  | -0.20267100 |
| H | 1.34825100  | -0.78330700 | -2.81399300 |
| C | 1.95661900  | -1.95465100 | -1.19589200 |
| C | 1.14630000  | -2.37799600 | -0.14750100 |
| C | 2.87723100  | -2.86880100 | -1.72828200 |

|   |             |             |             |
|---|-------------|-------------|-------------|
| C | 1.22942600  | -3.67841200 | 0.35422400  |
| H | 0.42316600  | -1.68540800 | 0.27110400  |
| C | 2.97800900  | -4.15922700 | -1.22474000 |
| H | 3.52041100  | -2.55981400 | -2.54851900 |
| C | 2.14843500  | -4.57316600 | -0.18085700 |
| H | 0.57108800  | -3.98846500 | 1.16071800  |
| H | 3.70013200  | -4.84915300 | -1.65023400 |
| H | 2.22007700  | -5.58379200 | 0.20786500  |
| H | 3.05557800  | 2.10747900  | -0.99001200 |
| C | -1.84296900 | 2.92916400  | -0.95788800 |
| C | -1.35502600 | 4.20546800  | -1.37392900 |
| C | -2.18133300 | 5.33452700  | -1.25386900 |
| C | -3.45483300 | 5.18838300  | -0.73298700 |
| C | -3.91967800 | 3.92713200  | -0.31298500 |
| C | -3.13092100 | 2.79287200  | -0.41395000 |
| C | 0.25656700  | 2.68663700  | -1.68394800 |
| C | -0.00977100 | 4.02010900  | -1.84315000 |
| H | -1.81948600 | 6.30905400  | -1.56886400 |
| H | -4.10370900 | 6.05327300  | -0.63972200 |
| H | -4.91839800 | 3.83704500  | 0.10268800  |
| H | -3.51437400 | 1.84261200  | -0.06206600 |
| H | 0.65332400  | 4.77283900  | -2.24492900 |
| N | -0.82447400 | 2.02392300  | -1.14957500 |
| H | 0.85717100  | 2.12508900  | -3.95386200 |
| C | 1.25578300  | 1.66425400  | -2.10770800 |
| O | 0.94854300  | 1.30040700  | -3.46089300 |
| C | 2.76730900  | 1.72365100  | -1.97432400 |
| C | 3.14806100  | 0.20622700  | -2.10916800 |
| H | 3.24406500  | 2.33476700  | -2.74462800 |
| H | 3.44461600  | 0.01786400  | -3.14466000 |

|   |            |             |             |
|---|------------|-------------|-------------|
| C | 4.31790700 | -0.14917900 | -1.22126400 |
| C | 5.57569400 | -0.39402500 | -1.77375400 |
| C | 4.17716600 | -0.22137000 | 0.16945300  |
| C | 6.66959900 | -0.69996400 | -0.96425000 |
| H | 5.69955400 | -0.34750300 | -2.85309400 |
| C | 5.26134500 | -0.53743900 | 0.98022900  |
| H | 3.20300200 | -0.05548700 | 0.62437900  |
| C | 6.51556900 | -0.77480000 | 0.41626000  |
| H | 7.63956500 | -0.88433000 | -1.41575200 |
| H | 5.12407700 | -0.60690100 | 2.05583400  |
| H | 7.36211300 | -1.02168100 | 1.04893200  |

M7RS

|   |             |            |             |
|---|-------------|------------|-------------|
| C | -2.32287600 | 4.54611500 | -0.07130500 |
| C | -1.56009400 | 3.38694700 | 0.03007400  |
| C | -0.24379300 | 3.33426600 | -0.41705200 |
| C | 0.30524400  | 4.47944700 | -0.98701700 |
| C | -0.45168300 | 5.65069300 | -1.09000200 |
| C | -1.76627500 | 5.69458500 | -0.63050300 |
| C | -3.70868200 | 4.33699600 | 0.48454800  |
| C | -3.82820900 | 2.81130500 | 0.72388200  |
| C | -2.36105400 | 2.25509800 | 0.62792100  |
| H | 0.32916200  | 2.41571600 | -0.31082300 |
| H | 1.32596300  | 4.46413400 | -1.35673100 |
| H | -0.01027400 | 6.53582100 | -1.53681900 |
| H | -2.34967800 | 6.60645700 | -0.71638000 |
| H | -4.50271800 | 4.67451100 | -0.18909400 |
| H | -4.24062300 | 2.59116300 | 1.70873600  |
| H | -3.83685100 | 4.87681500 | 1.42786500  |
| H | -1.96234600 | 1.92352900 | 1.58506700  |



|   |             |             |             |
|---|-------------|-------------|-------------|
| N | -2.30373500 | 1.08860300  | -0.27452100 |
| O | -4.73290400 | 2.18816800  | -0.17765900 |
| C | -1.44005300 | 0.05740700  | -0.34275500 |
| C | -3.11280800 | 1.02672000  | -1.37652000 |
| N | -1.77087100 | -0.58114700 | -1.47320800 |
| N | -2.81390400 | 0.00993700  | -2.12773200 |
| C | -4.21954100 | 2.02281900  | -1.48471100 |
| H | -3.85278000 | 2.96877000  | -1.90625500 |
| H | -5.01559900 | 1.63467300  | -2.11958000 |
| C | -1.08020100 | -1.68105400 | -2.09303400 |
| C | -0.10555600 | -1.34909500 | -3.04863700 |
| C | -1.35296500 | -2.98684800 | -1.69744000 |
| C | 0.66574200  | -2.38430700 | -3.55966000 |
| C | -0.53695900 | -3.99233800 | -2.23517800 |
| C | 0.48050500  | -3.70999400 | -3.14403300 |
| H | 1.44353600  | -2.15362900 | -4.28362100 |
| H | -0.71838300 | -5.02228400 | -1.93698300 |
| C | -2.47210000 | -3.34871800 | -0.76054400 |
| H | -3.12212800 | -4.08646500 | -1.23880200 |
| H | -3.08015500 | -2.48689200 | -0.48123200 |
| H | -2.07381800 | -3.79426600 | 0.15562100  |
| C | 1.37689600  | -4.79915500 | -3.67187800 |
| H | 1.49220200  | -4.71913400 | -4.75574300 |
| H | 0.98159800  | -5.78875000 | -3.43580700 |
| H | 2.37476300  | -4.71792500 | -3.22905200 |
| C | 0.12762700  | 0.08444400  | -3.44327900 |
| H | 0.46075700  | 0.67871000  | -2.58223500 |
| H | -0.78851800 | 0.54030000  | -3.82922800 |
| H | 0.90616500  | 0.15038800  | -4.20428400 |
| C | -0.37242100 | -0.26418600 | 0.77987300  |

|   |             |             |             |
|---|-------------|-------------|-------------|
| O | -0.24616700 | 0.74166900  | 1.58485500  |
| C | 0.96876800  | -0.85430600 | 0.16006500  |
| C | 2.16611100  | 0.10061300  | 0.30028300  |
| H | 0.82697500  | -1.15552200 | -0.87570000 |
| H | 1.79891500  | 0.99307400  | 0.81819000  |
| C | 2.78485600  | 0.49937500  | -1.01704100 |
| C | 3.00518700  | 1.84065900  | -1.33485900 |
| C | 3.15020400  | -0.47958600 | -1.95009500 |
| C | 3.55083700  | 2.20309600  | -2.56688700 |
| H | 2.74993100  | 2.60593200  | -0.60457000 |
| C | 3.69889400  | -0.12308600 | -3.17720700 |
| H | 2.98820200  | -1.52836000 | -1.70304600 |
| C | 3.89368100  | 1.22254600  | -3.49314500 |
| H | 3.71038700  | 3.25176000  | -2.79948700 |
| H | 3.97390900  | -0.89425800 | -3.89127400 |
| H | 4.31623000  | 1.50227800  | -4.45299000 |
| H | 1.74111100  | -1.07901100 | 2.79480700  |
| C | -2.06199000 | -1.83735200 | 2.11210000  |
| C | -1.86136800 | -3.12588000 | 2.68821400  |
| C | -2.90447700 | -3.70658400 | 3.42831000  |
| C | -4.09090300 | -3.00998200 | 3.58357300  |
| C | -4.26926900 | -1.73711100 | 3.00538100  |
| C | -3.26527600 | -1.13673100 | 2.26273900  |
| C | -0.00930900 | -2.54306300 | 1.56888600  |
| C | -0.53493700 | -3.55483000 | 2.32857000  |
| H | -2.77758800 | -4.68873600 | 3.87443200  |
| H | -4.90069800 | -3.44886700 | 4.15770700  |
| H | -5.21135300 | -1.21679700 | 3.14511800  |
| H | -3.41231400 | -0.15781900 | 1.81675300  |
| H | -0.04052600 | -4.47036600 | 2.61887900  |

|   |             |             |             |
|---|-------------|-------------|-------------|
| N | -0.92195200 | -1.53501000 | 1.40868200  |
| H | 1.32423500  | -3.41575300 | -0.47420500 |
| C | 1.30380200  | -2.12728000 | 0.97994500  |
| O | 1.94785800  | -3.12746200 | 0.20986600  |
| C | 2.30040600  | -1.61574900 | 2.02091000  |
| C | 3.17759900  | -0.62687300 | 1.24114500  |
| H | 2.86060100  | -2.43008700 | 2.48833100  |
| H | 3.87682000  | -1.20103900 | 0.62173600  |
| C | 3.96306300  | 0.32391300  | 2.11241900  |
| C | 5.35756800  | 0.35141900  | 2.08143900  |
| C | 3.29251900  | 1.20375700  | 2.97228100  |
| C | 6.07312000  | 1.23137600  | 2.89319200  |
| H | 5.88798700  | -0.32296500 | 1.41380700  |
| C | 4.00323600  | 2.08136500  | 3.78368700  |
| H | 2.20378900  | 1.20128200  | 2.99081800  |
| C | 5.39794900  | 2.09728200  | 3.74779600  |
| H | 7.15810200  | 1.23937300  | 2.85519700  |
| H | 3.46891900  | 2.75696400  | 4.44471600  |
| H | 5.95295900  | 2.78280200  | 4.38043100  |

M7SR

|   |             |             |             |
|---|-------------|-------------|-------------|
| C | -5.38358700 | 0.39116100  | -0.98260200 |
| C | -4.04349300 | 0.03920600  | -1.14158900 |
| C | -3.55616600 | -0.44815900 | -2.34747700 |
| C | -4.44089300 | -0.55573600 | -3.42093700 |
| C | -5.77795900 | -0.18168200 | -3.27811700 |
| C | -6.26033000 | 0.29086600  | -2.05698000 |
| C | -5.65490000 | 0.81600600  | 0.44089600  |
| C | -4.44746100 | 0.26761000  | 1.22314400  |
| C | -3.30266300 | 0.24421700  | 0.16725700  |

|   |             |             |             |
|---|-------------|-------------|-------------|
| H | -2.51545100 | -0.74400500 | -2.44275500 |
| H | -4.08740800 | -0.93899200 | -4.37251000 |
| H | -6.45415700 | -0.27433600 | -4.12188800 |
| H | -7.30678200 | 0.55714900  | -1.94299600 |
| H | -6.58889600 | 0.42162500  | 0.84846000  |
| H | -4.17579400 | 0.88905500  | 2.07877800  |
| H | -5.68579200 | 1.90857400  | 0.52520800  |
| H | -2.76241000 | 1.18868200  | 0.16785800  |
| N | -2.38326700 | -0.85893700 | 0.45859300  |
| O | -4.70684500 | -1.02534700 | 1.76705000  |
| C | -1.04310500 | -1.01845100 | 0.40530800  |
| C | -2.94249600 | -2.09715200 | 0.65969700  |
| N | -0.86401400 | -2.33817900 | 0.51309200  |
| N | -2.03490000 | -3.02428500 | 0.68712800  |
| C | -4.41169100 | -2.14351500 | 0.94452800  |
| H | -4.99750700 | -2.14792000 | 0.01814300  |
| H | -4.64596400 | -3.04029500 | 1.51828200  |
| C | 0.36299200  | -3.06896600 | 0.33128200  |
| C | 1.10193000  | -3.46354300 | 1.44927700  |
| C | 0.70691300  | -3.40964700 | -0.97981000 |
| C | 2.27258900  | -4.17910100 | 1.20913800  |
| C | 1.88506300  | -4.13279600 | -1.16368100 |
| C | 2.67923900  | -4.51808400 | -0.08336500 |
| H | 2.88167300  | -4.48458900 | 2.05653200  |
| H | 2.18273100  | -4.40609200 | -2.17300300 |
| C | -0.18068700 | -3.03818100 | -2.14112800 |
| H | -0.26848000 | -1.95228100 | -2.26635200 |
| H | -1.19243300 | -3.43122800 | -1.99436600 |
| H | 0.21504700  | -3.45416800 | -3.06901600 |
| C | 3.93812300  | -5.31740100 | -0.29356200 |

S220

|   |             |             |             |
|---|-------------|-------------|-------------|
| H | 4.73929500  | -4.95303200 | 0.35498700  |
| H | 4.27735500  | -5.25878500 | -1.33030100 |
| H | 3.77059500  | -6.37244400 | -0.05381000 |
| C | 0.62709100  | -3.14639200 | 2.83858900  |
| H | 0.51193000  | -2.06328800 | 2.93453100  |
| H | 1.33834500  | -3.51430200 | 3.58018200  |
| H | -0.34310100 | -3.61827100 | 3.02676800  |
| C | 0.14877700  | 0.02515900  | 0.63828100  |
| O | 0.71629600  | -0.27723800 | 1.75393400  |
| C | 1.01392900  | 0.17001500  | -0.66320100 |
| C | 2.37026700  | 0.79278100  | -0.31331100 |
| H | 1.14483300  | -0.77749200 | -1.19364900 |
| H | 2.20311900  | 1.48825300  | 0.51833700  |
| C | 3.42013200  | -0.20502000 | 0.12107500  |
| C | 3.90023900  | -0.20888400 | 1.43238200  |
| C | 3.93647200  | -1.14385900 | -0.77783600 |
| C | 4.88554500  | -1.10795600 | 1.83149800  |
| H | 3.47782100  | 0.49178500  | 2.14576700  |
| C | 4.92454700  | -2.04262800 | -0.38546200 |
| H | 3.55960000  | -1.18144300 | -1.79797100 |
| C | 5.40706500  | -2.02532700 | 0.92114400  |
| H | 5.24708100  | -1.09135200 | 2.85515300  |
| H | 5.31483600  | -2.76091700 | -1.10089200 |
| H | 6.18046200  | -2.72308500 | 1.22852100  |
| H | 1.26288500  | 3.01917900  | -2.39240200 |
| C | -1.14793000 | 2.13897500  | 1.55292600  |
| C | -1.51225300 | 3.35640500  | 0.90902700  |
| C | -2.24090800 | 4.30872700  | 1.64522400  |
| C | -2.57879700 | 4.02743200  | 2.95764100  |
| C | -2.20462200 | 2.81120100  | 3.57076000  |

|   |             |            |             |
|---|-------------|------------|-------------|
| C | -1.48637700 | 1.84938000 | 2.88116500  |
| C | -0.40360600 | 2.06621900 | -0.55774400 |
| C | -1.01574900 | 3.29127400 | -0.44335400 |
| H | -2.53689200 | 5.24828900 | 1.18780100  |
| H | -3.14178800 | 4.75584500 | 3.53257100  |
| H | -2.48296800 | 2.63054700 | 4.60423500  |
| H | -1.17457700 | 0.91151000 | 3.32728600  |
| H | -1.08965300 | 4.05811700 | -1.20155800 |
| N | -0.50127100 | 1.38023900 | 0.61709600  |
| H | -1.16046800 | 1.20354200 | -2.83709700 |
| C | 0.33136400  | 1.21528400 | -1.56745600 |
| O | -0.58907300 | 0.54235300 | -2.42352400 |
| C | 1.45445500  | 1.94468800 | -2.32114100 |
| C | 2.77534700  | 1.62649200 | -1.56917900 |
| H | 1.49360300  | 1.54769700 | -3.33895800 |
| H | 3.38739400  | 0.99018100 | -2.21545800 |
| C | 3.61317700  | 2.82410100 | -1.18488100 |
| C | 4.99206300  | 2.82564900 | -1.40079600 |
| C | 3.03351000  | 3.92889000 | -0.55016300 |
| C | 5.77674800  | 3.90772300 | -1.00432900 |
| H | 5.45470000  | 1.96753600 | -1.88209700 |
| C | 3.81253800  | 5.01131100 | -0.15436800 |
| H | 1.96088200  | 3.93585500 | -0.36019700 |
| C | 5.18852400  | 5.00531900 | -0.38263600 |
| H | 6.84743100  | 3.89182200 | -1.18302500 |
| H | 3.34607500  | 5.86075000 | 0.33494400  |
| H | 5.79617800  | 5.85063800 | -0.07589700 |

M7SS

|   |            |            |             |
|---|------------|------------|-------------|
| C | 0.51872800 | 0.32439700 | -0.89034100 |
|---|------------|------------|-------------|

S222

|   |             |             |             |
|---|-------------|-------------|-------------|
| O | 1.20752600  | -0.18386500 | -1.88580500 |
| C | -1.01151400 | 0.44213000  | -1.15639100 |
| C | -1.83172200 | -0.56491200 | -1.95871200 |
| H | -1.54084500 | 0.70662000  | -0.23432700 |
| H | -1.24939800 | -0.74252300 | -2.86627300 |
| C | -1.98282500 | -1.94129300 | -1.32614600 |
| C | -0.81297200 | -2.72373500 | -1.36418700 |
| C | -3.11982800 | -2.50717000 | -0.74088300 |
| C | -0.77213200 | -4.00800600 | -0.83513900 |
| H | 0.06887600  | -2.28835700 | -1.83042600 |
| C | -3.08452000 | -3.80747200 | -0.22972100 |
| H | -4.04972800 | -1.96034800 | -0.67634600 |
| C | -1.91855700 | -4.56216200 | -0.26527000 |
| H | 0.14753300  | -4.58409300 | -0.88197700 |
| H | -3.98654700 | -4.22478000 | 0.20842900  |
| H | -1.90118400 | -5.56924400 | 0.13899100  |
| H | -3.01935000 | 2.32946300  | -1.47462800 |
| C | 1.80672400  | 2.61750900  | -0.24194100 |
| C | 1.50643700  | 3.95382900  | -0.63462400 |
| C | 2.37976600  | 4.98775700  | -0.25895600 |
| C | 3.51245000  | 4.68302700  | 0.47663100  |
| C | 3.78947500  | 3.35722100  | 0.86392900  |
| C | 2.94226300  | 2.31594400  | 0.52170100  |
| C | -0.14173800 | 2.61835900  | -1.36468400 |
| C | 0.26102400  | 3.92428500  | -1.35599000 |
| H | 2.16440900  | 6.01357000  | -0.54378800 |
| H | 4.19621300  | 5.47460200  | 0.76596500  |
| H | 4.68259600  | 3.14444600  | 1.44273300  |
| H | 3.16494300  | 1.29995400  | 0.83298800  |
| H | -0.23749300 | 4.75845500  | -1.82777000 |

|   |             |             |             |
|---|-------------|-------------|-------------|
| N | 0.75835700  | 1.83161100  | -0.66383700 |
| H | 0.32268400  | 0.83879000  | -3.14605200 |
| C | -1.06015500 | 1.67302100  | -2.08794100 |
| O | -0.47618400 | 1.37477100  | -3.35275600 |
| C | -2.54908900 | 1.82257400  | -2.32148400 |
| C | -3.05108300 | 0.33721800  | -2.43629900 |
| H | -2.76486400 | 2.39196700  | -3.22786900 |
| H | -3.22164700 | 0.10325900  | -3.49045700 |
| C | -4.36708800 | 0.13615800  | -1.72040200 |
| C | -5.42787800 | -0.49234800 | -2.37729500 |
| C | -4.54485200 | 0.51580700  | -0.38473100 |
| C | -6.62393000 | -0.76558600 | -1.71685000 |
| H | -5.30485300 | -0.79046000 | -3.41521000 |
| C | -5.73226000 | 0.23278600  | 0.28299700  |
| H | -3.73988800 | 1.01004500  | 0.15538900  |
| C | -6.77639300 | -0.41249300 | -0.37905900 |
| H | -7.43259600 | -1.26010100 | -2.24590800 |
| H | -5.84359300 | 0.51250300  | 1.32592200  |
| H | -7.70201600 | -0.63134000 | 0.14346000  |
| C | 5.22438800  | -1.90278200 | -0.41765900 |
| C | 4.09548200  | -1.14372100 | -0.72124900 |
| C | 4.20915300  | 0.09167500  | -1.35577500 |
| C | 5.48266500  | 0.58768900  | -1.62112600 |
| C | 6.61868500  | -0.15330100 | -1.28549400 |
| C | 6.49684700  | -1.40905500 | -0.69576900 |
| C | 4.86105200  | -3.24827800 | 0.14654000  |
| C | 3.31837800  | -3.24610600 | 0.26471100  |
| C | 2.82242800  | -1.87458200 | -0.35456400 |
| H | 3.31084800  | 0.62628800  | -1.64588300 |
| H | 5.59180800  | 1.55563300  | -2.09969900 |



|   |             |             |             |
|---|-------------|-------------|-------------|
| H | 7.60481800  | 0.24652700  | -1.50041500 |
| H | 7.37884000  | -1.99706800 | -0.46000000 |
| H | 5.31362800  | -3.43976000 | 1.12553900  |
| H | 2.87592600  | -4.05898100 | -0.31102100 |
| H | 5.19230800  | -4.05401700 | -0.51470000 |
| H | 2.18942300  | -2.02459200 | -1.22556200 |
| N | 1.97142400  | -1.14542700 | 0.62612500  |
| O | 2.89170000  | -3.48599900 | 1.59554800  |
| C | 0.91788500  | -0.31623700 | 0.46569800  |
| C | 2.11243500  | -1.35230700 | 1.97364100  |
| N | 0.46404200  | -0.07413300 | 1.70602900  |
| N | 1.20338900  | -0.72194300 | 2.65232500  |
| C | 3.09417700  | -2.37003700 | 2.43924100  |
| H | 4.12298000  | -1.99084600 | 2.38323900  |
| H | 2.87229500  | -2.66213200 | 3.46502900  |
| C | -0.82603200 | 0.43834300  | 2.12950100  |
| C | -1.81748200 | -0.53366700 | 2.33664700  |
| C | -1.02405500 | 1.79144400  | 2.41073700  |
| C | -3.07153800 | -0.09780100 | 2.75910000  |
| C | -2.30074700 | 2.17103300  | 2.83098300  |
| C | -3.33357400 | 1.25208100  | 3.00329900  |
| H | -3.85458600 | -0.83519600 | 2.91667000  |
| H | -2.47789000 | 3.21999000  | 3.05716100  |
| C | 0.05818000  | 2.82801100  | 2.32518800  |
| H | 1.05470600  | 2.38613500  | 2.35481200  |
| H | -0.03778900 | 3.52433200  | 3.16150900  |
| H | -0.02933200 | 3.40202700  | 1.39777000  |
| C | -4.68770500 | 1.71756500  | 3.47244400  |
| H | -5.33858200 | 0.87351500  | 3.71087700  |
| H | -5.17740900 | 2.32358200  | 2.70325500  |

|   |             |             |            |
|---|-------------|-------------|------------|
| H | -4.59500300 | 2.34136300  | 4.36557500 |
| C | -1.52189300 | -2.00177900 | 2.19216100 |
| H | -0.87276300 | -2.33429400 | 3.00842500 |
| H | -1.01927100 | -2.23609300 | 1.24812800 |
| H | -2.44538600 | -2.57904100 | 2.22724600 |

TS8RR

|   |            |             |             |
|---|------------|-------------|-------------|
| C | 4.11543400 | 3.29395100  | -0.14246900 |
| C | 2.99374200 | 2.50275000  | -0.37344300 |
| C | 1.74999400 | 3.06165100  | -0.65381200 |
| C | 1.64518500 | 4.45026700  | -0.69016500 |
| C | 2.76581600 | 5.25246400  | -0.45534100 |
| C | 4.00741700 | 4.68233600  | -0.18352600 |
| C | 5.33934800 | 2.45291100  | 0.11533600  |
| C | 4.82892200 | 0.99225000  | 0.19780200  |
| C | 3.32723200 | 1.03291500  | -0.27392400 |
| H | 0.88732600 | 2.42776900  | -0.84913100 |
| H | 0.68397100 | 4.90664800  | -0.90379300 |
| H | 2.66692300 | 6.33308100  | -0.48641200 |
| H | 4.87527400 | 5.30976600  | -0.00217700 |
| H | 5.85845700 | 2.72098600  | 1.04170400  |
| H | 5.39814700 | 0.33715900  | -0.46279200 |
| H | 6.06590300 | 2.55591100  | -0.69638400 |
| H | 3.18885200 | 0.52779300  | -1.22900400 |
| N | 2.44721900 | 0.36603700  | 0.69656500  |
| O | 5.00952500 | 0.42449200  | 1.48638800  |
| C | 1.22427400 | -0.19950900 | 0.51846700  |
| C | 2.74554100 | 0.38786800  | 2.03309500  |
| N | 0.86450700 | -0.49349100 | 1.78161500  |
| N | 1.79349800 | -0.14418800 | 2.73384700  |

|   |             |             |             |
|---|-------------|-------------|-------------|
| C | 4.08465000  | 0.89776300  | 2.44729500  |
| H | 4.08428500  | 1.99561900  | 2.50292800  |
| H | 4.36481800  | 0.49333700  | 3.41980300  |
| C | -0.40197800 | -0.99777200 | 2.23369200  |
| C | -1.26369300 | -0.09281400 | 2.87052700  |
| C | -0.71033800 | -2.35249700 | 2.09319100  |
| C | -2.51022200 | -0.56096200 | 3.27892400  |
| C | -1.98348400 | -2.76620000 | 2.49608300  |
| C | -2.89830300 | -1.88804200 | 3.07405100  |
| H | -3.19168100 | 0.12759400  | 3.77271300  |
| H | -2.24903800 | -3.81480100 | 2.38032300  |
| C | 0.28611000  | -3.36928100 | 1.60866300  |
| H | 1.26936800  | -2.93387200 | 1.42742800  |
| H | -0.05339900 | -3.83967800 | 0.68287400  |
| H | 0.39277000  | -4.15548900 | 2.36153800  |
| C | -4.27577500 | -2.36143900 | 3.45880400  |
| H | -4.24391900 | -3.36966900 | 3.87876700  |
| H | -4.92744400 | -2.39203200 | 2.57838100  |
| H | -4.73514200 | -1.69391400 | 4.19159300  |
| C | -0.83765500 | 1.32278900  | 3.15908600  |
| H | -1.70815200 | 1.93946000  | 3.39186800  |
| H | -0.30477800 | 1.77007100  | 2.31439200  |
| H | -0.15981800 | 1.34593800  | 4.01742400  |
| C | 0.64176000  | -0.60328800 | -1.38645700 |
| O | 1.35434700  | 0.09910000  | -2.10540600 |
| C | -0.89027200 | -0.56697000 | -1.36174900 |
| C | -1.76291000 | 0.49410900  | -2.00940500 |
| H | -1.22151900 | -0.76286100 | -0.33398200 |
| H | -1.40015500 | 0.62871800  | -3.02999100 |
| C | -1.83595100 | 1.85880000  | -1.37959200 |

|   |             |             |             |
|---|-------------|-------------|-------------|
| C | -1.86314800 | 2.05322900  | 0.00424200  |
| C | -1.91216400 | 2.98142100  | -2.20975000 |
| C | -1.97271800 | 3.33411500  | 0.54068400  |
| H | -1.81507700 | 1.19207100  | 0.66541400  |
| C | -2.02740200 | 4.26377800  | -1.67852800 |
| H | -1.88253700 | 2.84357700  | -3.28766700 |
| C | -2.06117700 | 4.44338800  | -0.29780600 |
| H | -1.99358200 | 3.46941000  | 1.61729900  |
| H | -2.08616000 | 5.12077800  | -2.34250700 |
| H | -2.14974000 | 5.44000500  | 0.12319000  |
| H | -3.04578400 | -2.21083700 | -0.98811300 |
| C | 1.92072000  | -2.92486400 | -1.18509900 |
| C | 1.45601400  | -4.23599200 | -1.48861700 |
| C | 2.34536900  | -5.31574000 | -1.37051700 |
| C | 3.64825200  | -5.07383400 | -0.96830100 |
| C | 4.08649000  | -3.76926400 | -0.66796200 |
| C | 3.23449500  | -2.68127600 | -0.76654900 |
| C | -0.25556400 | -2.80708200 | -1.73782300 |
| C | 0.06499100  | -4.13098200 | -1.85382400 |
| H | 2.01283900  | -6.32546100 | -1.59260400 |
| H | 4.34555500  | -5.90034300 | -0.87718100 |
| H | 5.11242200  | -3.61240000 | -0.35059200 |
| H | 3.57354800  | -1.68083600 | -0.52078200 |
| H | -0.58787500 | -4.93284500 | -2.16704300 |
| N | 0.84814100  | -2.07987800 | -1.32390500 |
| H | -1.03434700 | -2.36733400 | -4.02812700 |
| C | -1.28592700 | -1.80967600 | -2.18034800 |
| O | -1.01741700 | -1.52336100 | -3.55975400 |
| C | -2.79254100 | -1.82474200 | -1.97937500 |
| C | -3.15302800 | -0.30434900 | -2.12054100 |

|   |             |             |             |
|---|-------------|-------------|-------------|
| H | -3.30935700 | -2.43185700 | -2.72618200 |
| H | -3.53652000 | -0.12468100 | -3.12828600 |
| C | -4.19934900 | 0.18162800  | -1.14418600 |
| C | -5.15321100 | 1.10856600  | -1.57452300 |
| C | -4.20299100 | -0.19088700 | 0.20438500  |
| C | -6.08767400 | 1.64657200  | -0.69383600 |
| H | -5.15553700 | 1.41709400  | -2.61703900 |
| C | -5.13242200 | 0.34868900  | 1.09077400  |
| H | -3.46233300 | -0.89140700 | 0.58619900  |
| C | -6.08073000 | 1.26661600  | 0.64584800  |
| H | -6.81969700 | 2.36221900  | -1.05499900 |
| H | -5.11263800 | 0.05184300  | 2.13553800  |
| H | -6.80619500 | 1.68208300  | 1.33785500  |

TS8RS

|   |             |            |             |
|---|-------------|------------|-------------|
| C | 2.77169200  | 4.32051700 | -0.61517700 |
| C | 1.95062200  | 3.19998900 | -0.53690800 |
| C | 0.66890900  | 3.26957300 | 0.00211000  |
| C | 0.22076000  | 4.49684000 | 0.48299100  |
| C | 1.04074100  | 5.62731400 | 0.41164000  |
| C | 2.31686100  | 5.54979400 | -0.14123000 |
| C | 4.09706600  | 3.98488300 | -1.25025800 |
| C | 4.11477500  | 2.44067000 | -1.37708300 |
| C | 2.64632700  | 1.96804200 | -1.06787000 |
| H | 0.03483500  | 2.38503800 | 0.03338200  |
| H | -0.77062700 | 4.57396100 | 0.91832100  |
| H | 0.67756900  | 6.57653100 | 0.79274700  |
| H | 2.94932300  | 6.43108100 | -0.19285300 |
| H | 4.95604000  | 4.32235900 | -0.66109100 |
| H | 4.39632400  | 2.12737000 | -2.38278800 |

|   |             |             |             |
|---|-------------|-------------|-------------|
| H | 4.18674800  | 4.44752100  | -2.23804200 |
| H | 2.14316300  | 1.57107300  | -1.94982400 |
| N | 2.64120900  | 0.91036800  | -0.05413400 |
| O | 5.09342500  | 1.83819300  | -0.54212700 |
| C | 1.67670300  | -0.00363500 | 0.20638700  |
| C | 3.57122100  | 0.88806600  | 0.95194800  |
| N | 2.10130200  | -0.54055100 | 1.35954200  |
| N | 3.27538100  | -0.00853600 | 1.84330100  |
| C | 4.74564400  | 1.80160200  | 0.82935700  |
| H | 4.49878800  | 2.80177000  | 1.21344300  |
| H | 5.59866500  | 1.41160200  | 1.38476100  |
| C | 1.36038100  | -1.48593300 | 2.14298500  |
| C | 0.48314100  | -0.97367400 | 3.11011500  |
| C | 1.50527900  | -2.85013300 | 1.89513200  |
| C | -0.30834700 | -1.88101700 | 3.80846500  |
| C | 0.68951600  | -3.72374200 | 2.62384800  |
| C | -0.22469300 | -3.25875700 | 3.57148600  |
| H | -1.00972000 | -1.50696800 | 4.55077800  |
| H | 0.77523900  | -4.79227100 | 2.44328100  |
| C | 2.53696600  | -3.36321900 | 0.92956000  |
| H | 3.52497600  | -3.35084800 | 1.40212700  |
| H | 2.59294800  | -2.74504300 | 0.03106100  |
| H | 2.31041800  | -4.38702300 | 0.62772900  |
| C | -1.13257000 | -4.21120300 | 4.30496000  |
| H | -1.19820100 | -3.95230200 | 5.36456400  |
| H | -0.77985500 | -5.24055300 | 4.21905500  |
| H | -2.14545500 | -4.16535400 | 3.89170600  |
| C | 0.40218800  | 0.50962400  | 3.35596800  |
| H | 0.10605200  | 1.04934500  | 2.44757500  |
| H | 1.37546900  | 0.90163300  | 3.66603500  |

|   |             |             |             |
|---|-------------|-------------|-------------|
| H | -0.33407700 | 0.73284400  | 4.12906400  |
| C | 0.09130100  | -0.34783300 | -1.07860800 |
| O | 0.13878000  | 0.58332500  | -1.88817300 |
| C | -1.07406100 | -0.58938100 | -0.07326200 |
| C | -2.27854100 | 0.34671200  | -0.27751500 |
| H | -0.69361700 | -0.53619300 | 0.94580000  |
| H | -2.04571300 | 1.01565500  | -1.11395700 |
| C | -2.62256500 | 1.17791800  | 0.93612100  |
| C | -2.81460400 | 2.55657200  | 0.83929200  |
| C | -2.79083100 | 0.56129000  | 2.18284000  |
| C | -3.15558600 | 3.30913100  | 1.96431100  |
| H | -2.69310400 | 3.04348100  | -0.12587900 |
| C | -3.13009500 | 1.30841600  | 3.30562000  |
| H | -2.64459700 | -0.51589800 | 2.26504400  |
| C | -3.31107200 | 2.68785000  | 3.20009200  |
| H | -3.30247400 | 4.38127500  | 1.87137500  |
| H | -3.25206300 | 0.81571800  | 4.26595300  |
| H | -3.57505800 | 3.27224000  | 4.07555400  |
| H | -2.39504800 | -1.60048100 | -2.28911700 |
| C | 1.47954900  | -2.24991200 | -2.21230900 |
| C | 1.25949600  | -3.65515200 | -2.20758800 |
| C | 2.18822600  | -4.48041800 | -2.85928900 |
| C | 3.28555900  | -3.90089800 | -3.47739800 |
| C | 3.48408600  | -2.50671200 | -3.46041200 |
| C | 2.58592400  | -1.66025100 | -2.82847500 |
| C | -0.38290200 | -2.68219300 | -1.02882200 |
| C | 0.05651600  | -3.90507100 | -1.44935100 |
| H | 2.04947400  | -5.55732000 | -2.87496900 |
| H | 4.00937700  | -4.53116500 | -3.98409900 |
| H | 4.35506100  | -2.08703200 | -3.95319900 |

|   |             |             |             |
|---|-------------|-------------|-------------|
| H | 2.72399600  | -0.58436000 | -2.81692000 |
| H | -0.41449300 | -4.85985600 | -1.26695800 |
| N | 0.46440700  | -1.69299900 | -1.47298200 |
| H | -1.25552400 | -2.86640400 | 1.37691000  |
| C | -1.56005600 | -2.04083300 | -0.35221600 |
| O | -2.01887100 | -2.71400500 | 0.79977800  |
| C | -2.76075100 | -1.82308000 | -1.27998100 |
| C | -3.45772500 | -0.59289500 | -0.68313300 |
| H | -3.39921400 | -2.70873200 | -1.32835800 |
| H | -3.95967100 | -0.91224500 | 0.23748700  |
| C | -4.47371200 | 0.07224100  | -1.57880000 |
| C | -5.80208600 | 0.21077600  | -1.17387100 |
| C | -4.10065000 | 0.57543800  | -2.83097200 |
| C | -6.74102500 | 0.82846800  | -1.99867800 |
| H | -6.10341600 | -0.16976300 | -0.20131700 |
| C | -5.03438100 | 1.19048800  | -3.65801100 |
| H | -3.06662300 | 0.48950700  | -3.15876900 |
| C | -6.36035100 | 1.31789600  | -3.24463000 |
| H | -7.76954500 | 0.92636900  | -1.66538400 |
| H | -4.72695400 | 1.57276100  | -4.62640800 |
| H | -7.08927100 | 1.79759500  | -3.89000500 |

TS8SR

|   |             |             |            |
|---|-------------|-------------|------------|
| C | -5.26566400 | -0.65821000 | 1.55979100 |
| C | -3.91296800 | -0.32392900 | 1.54930300 |
| C | -3.24089900 | 0.04053100  | 2.71003200 |
| C | -3.95527700 | 0.06024700  | 3.90728600 |
| C | -5.31003000 | -0.27965100 | 3.92893500 |
| C | -5.97476800 | -0.64136100 | 2.75724400 |
| C | -5.74209000 | -0.99719000 | 0.16748900 |



|   |             |             |             |
|---|-------------|-------------|-------------|
| C | -4.62594800 | -0.47650400 | -0.76336100 |
| C | -3.35471900 | -0.41257000 | 0.14407700  |
| H | -2.18495500 | 0.29680900  | 2.67545800  |
| H | -3.45709000 | 0.34482800  | 4.82840400  |
| H | -5.85372800 | -0.25508200 | 4.86797800  |
| H | -7.03073600 | -0.89400700 | 2.77859200  |
| H | -6.70000800 | -0.53872200 | -0.09328500 |
| H | -4.45273400 | -1.13456100 | -1.61824500 |
| H | -5.85111100 | -2.08113900 | 0.04866100  |
| H | -2.74536300 | -1.30714100 | 0.02519400  |
| N | -2.55352600 | 0.75760000  | -0.18880100 |
| O | -4.95172300 | 0.78684200  | -1.33562000 |
| C | -1.21396700 | 0.95761800  | -0.18086300 |
| C | -3.18780300 | 1.96233500  | -0.35098500 |
| N | -1.12045400 | 2.28669100  | -0.31120000 |
| N | -2.33014700 | 2.93317700  | -0.42955600 |
| C | -4.67234300 | 1.92359500  | -0.53281800 |
| H | -5.19010900 | 1.88185300  | 0.43415400  |
| H | -5.00991800 | 2.80455000  | -1.07901600 |
| C | 0.08485100  | 3.05933600  | -0.22617700 |
| C | 0.62204800  | 3.61243400  | -1.39218500 |
| C | 0.63123200  | 3.27230600  | 1.04111900  |
| C | 1.77509000  | 4.38044400  | -1.26046500 |
| C | 1.78627400  | 4.05304700  | 1.12053800  |
| C | 2.37085500  | 4.60791100  | -0.01651100 |
| H | 2.21985300  | 4.81694100  | -2.15174900 |
| H | 2.23378300  | 4.23338800  | 2.09547600  |
| C | -0.02383000 | 2.71314000  | 2.27960000  |
| H | 0.06336900  | 1.62193300  | 2.33761300  |
| H | -1.09321600 | 2.94869400  | 2.29344800  |

|   |             |             |             |
|---|-------------|-------------|-------------|
| H | 0.43322700  | 3.13664200  | 3.17561200  |
| C | 3.62176400  | 5.44187800  | 0.07746800  |
| H | 4.43998800  | 4.96555100  | -0.47197600 |
| H | 3.93766400  | 5.57027400  | 1.11533300  |
| H | 3.46623500  | 6.43281700  | -0.35885800 |
| C | -0.04287300 | 3.39065600  | -2.72227600 |
| H | -0.15087500 | 2.31773700  | -2.90133800 |
| H | 0.54936500  | 3.83228700  | -3.52575600 |
| H | -1.03911900 | 3.84359300  | -2.73663300 |
| C | 0.21097200  | -0.16888400 | -0.88203700 |
| O | 0.63477800  | 0.43996100  | -1.87481000 |
| C | 1.05838100  | -0.50064500 | 0.36197200  |
| C | 2.47910200  | -0.95756500 | 0.00743000  |
| H | 1.09251000  | 0.34860600  | 1.04611200  |
| H | 2.43290100  | -1.59832300 | -0.88456700 |
| C | 3.48141300  | 0.14272800  | -0.23911200 |
| C | 4.33093800  | 0.09560800  | -1.34670700 |
| C | 3.63848200  | 1.18738000  | 0.67651700  |
| C | 5.30892400  | 1.06840800  | -1.54064300 |
| H | 4.22158500  | -0.71387100 | -2.06365500 |
| C | 4.61690700  | 2.15880100  | 0.48964900  |
| H | 2.99244900  | 1.25151400  | 1.54953100  |
| C | 5.45603800  | 2.10424600  | -0.62114500 |
| H | 5.95651400  | 1.01622600  | -2.41028700 |
| H | 4.71923100  | 2.96367400  | 1.21217500  |
| H | 6.21987300  | 2.86198700  | -0.76704800 |
| H | 1.55599200  | -3.56685900 | 0.88012800  |
| C | -1.44199700 | -1.86494200 | -2.00941300 |
| C | -1.93218900 | -3.11099800 | -1.52618600 |
| C | -2.90168100 | -3.78983000 | -2.28379600 |

|   |             |             |             |
|---|-------------|-------------|-------------|
| C | -3.34910000 | -3.22069200 | -3.46493900 |
| C | -2.84947800 | -1.98144300 | -3.91844800 |
| C | -1.89015600 | -1.28482700 | -3.20107700 |
| C | -0.48393300 | -2.28336200 | -0.02134900 |
| C | -1.29499000 | -3.36284200 | -0.25545200 |
| H | -3.29736300 | -4.74187000 | -1.94284300 |
| H | -4.10074400 | -3.73483300 | -4.05532800 |
| H | -3.22677300 | -1.56572200 | -4.84714900 |
| H | -1.49451300 | -0.33167400 | -3.53283100 |
| H | -1.43206900 | -4.22547400 | 0.38108000  |
| N | -0.55778700 | -1.40267100 | -1.06710400 |
| H | -0.93011900 | -1.95611300 | 2.46972900  |
| C | 0.40649400  | -1.71980100 | 1.06126100  |
| O | -0.36167800 | -1.23865200 | 2.15897900  |
| C | 1.56539900  | -2.65481800 | 1.48382900  |
| C | 2.84963700  | -1.84714000 | 1.22332700  |
| H | 1.46438900  | -2.94446600 | 2.53288600  |
| H | 3.00618900  | -1.17050300 | 2.07417800  |
| C | 4.11256700  | -2.64636900 | 1.01730900  |
| C | 5.26793500  | -2.34027500 | 1.73938300  |
| C | 4.17322700  | -3.66981200 | 0.06468700  |
| C | 6.45291500  | -3.04202200 | 1.52754500  |
| H | 5.23665900  | -1.53823900 | 2.47262100  |
| C | 5.35426800  | -4.37340400 | -0.15041900 |
| H | 3.29043400  | -3.91853000 | -0.51983500 |
| C | 6.49901800  | -4.06302200 | 0.58269700  |
| H | 7.33958300  | -2.78825000 | 2.10003600  |
| H | 5.38274300  | -5.16501800 | -0.89287900 |
| H | 7.42023000  | -4.61155600 | 0.41436700  |

TS8SS

|   |             |             |             |
|---|-------------|-------------|-------------|
| C | 0.46926200  | 0.44397900  | -1.39192200 |
| O | 1.13451300  | -0.16560300 | -2.22658800 |
| C | -1.06503500 | 0.35819300  | -1.27534000 |
| C | -1.99775100 | -0.66129600 | -1.94415600 |
| H | -1.34352500 | 0.48326600  | -0.22230000 |
| H | -1.60708400 | -0.82751900 | -2.95399800 |
| C | -2.00553300 | -2.01984000 | -1.25298400 |
| C | -0.74369500 | -2.56213900 | -0.96444100 |
| C | -3.12525900 | -2.78488200 | -0.91283500 |
| C | -0.59431700 | -3.76693600 | -0.28727000 |
| H | 0.13239800  | -2.01969200 | -1.30184200 |
| C | -2.98165000 | -3.99763300 | -0.23460900 |
| H | -4.12393100 | -2.45402800 | -1.16093000 |
| C | -1.72442600 | -4.48493100 | 0.10301600  |
| H | 0.40228800  | -4.14607800 | -0.06971500 |
| H | -3.87104200 | -4.56083200 | 0.03135300  |
| H | -1.62352100 | -5.42216000 | 0.64113500  |
| H | -3.20511000 | 1.96819400  | -0.82331300 |
| C | 1.70323600  | 2.69946700  | -0.73603000 |
| C | 1.17414700  | 4.01971200  | -0.73719700 |
| C | 2.00474600  | 5.08231800  | -0.34726000 |
| C | 3.31475500  | 4.81481800  | 0.01739900  |
| C | 3.81599600  | 3.49874500  | 0.01041400  |
| C | 3.01958000  | 2.42668900  | -0.35865500 |
| C | -0.45507600 | 2.62598000  | -1.38607400 |
| C | -0.20098400 | 3.94548200  | -1.16869800 |
| H | 1.62271800  | 6.09877000  | -0.33543400 |
| H | 3.96624000  | 5.63046600  | 0.31446200  |
| H | 4.84490600  | 3.31631400  | 0.30495000  |

|   |             |             |             |
|---|-------------|-------------|-------------|
| H | 3.38951600  | 1.41012800  | -0.33229700 |
| H | -0.88377800 | 4.76913600  | -1.31582700 |
| N | 0.67646600  | 1.86401100  | -1.11114000 |
| H | -0.28229700 | 1.29156400  | -3.53971400 |
| C | -1.44142400 | 1.67539000  | -1.99835100 |
| O | -1.19936900 | 1.57275200  | -3.40092400 |
| C | -2.94072900 | 1.68879900  | -1.84699500 |
| C | -3.33205200 | 0.20263400  | -2.14606300 |
| H | -3.42810500 | 2.38064800  | -2.53708400 |
| H | -3.58297500 | 0.12830800  | -3.20691800 |
| C | -4.57236100 | -0.16975800 | -1.36654200 |
| C | -5.71910700 | -0.61402200 | -2.02692900 |
| C | -4.60399400 | -0.06966600 | 0.02750400  |
| C | -6.85950700 | -0.98118800 | -1.31293600 |
| H | -5.71322500 | -0.68950900 | -3.11123200 |
| C | -5.73536600 | -0.43982500 | 0.74572900  |
| H | -3.72316300 | 0.28632000  | 0.55663500  |
| C | -6.86847500 | -0.90320800 | 0.07679800  |
| H | -7.73979300 | -1.32873200 | -1.84471100 |
| H | -5.73657700 | -0.36912300 | 1.83007800  |
| H | -7.75257700 | -1.19237800 | 0.63562500  |
| C | 5.12237200  | -1.73494400 | -0.05478100 |
| C | 4.01389600  | -1.30481400 | -0.79434600 |
| C | 4.15410400  | -0.33538900 | -1.78221800 |
| C | 5.40919200  | 0.24352700  | -1.97776000 |
| C | 6.50461300  | -0.15551800 | -1.21255600 |
| C | 6.37086100  | -1.15814600 | -0.25189700 |
| C | 4.75042600  | -2.87612100 | 0.85281000  |
| C | 3.46257000  | -3.38994900 | 0.17537100  |
| C | 2.79069900  | -2.12683300 | -0.43486900 |

|   |             |             |             |
|---|-------------|-------------|-------------|
| H | 3.29322200  | -0.02685600 | -2.36513200 |
| H | 5.53214600  | 1.01047700  | -2.73564200 |
| H | 7.47425500  | 0.30315500  | -1.37915800 |
| H | 7.23082000  | -1.49386100 | 0.31984900  |
| H | 4.56024200  | -2.51161300 | 1.86891000  |
| H | 3.74214800  | -4.03096900 | -0.66386800 |
| H | 5.51608500  | -3.65199300 | 0.91784100  |
| H | 2.17075400  | -2.35774300 | -1.30397500 |
| N | 1.90804400  | -1.52915900 | 0.59785500  |
| O | 2.60807100  | -4.17280400 | 0.97851500  |
| C | 1.16334500  | -0.38247200 | 0.52241700  |
| C | 1.63452600  | -2.15834300 | 1.79087000  |
| N | 0.54313500  | -0.37602100 | 1.71459300  |
| N | 0.81102600  | -1.46066200 | 2.50899400  |
| C | 2.17035300  | -3.51016800 | 2.14543700  |
| H | 2.97037700  | -3.43270300 | 2.89128300  |
| H | 1.36262500  | -4.10748100 | 2.57260000  |
| C | -0.39546700 | 0.60313800  | 2.18474400  |
| C | -1.72394200 | 0.19173500  | 2.39279800  |
| C | 0.02914100  | 1.90816500  | 2.44764300  |
| C | -2.64580000 | 1.15939300  | 2.78137700  |
| C | -0.94586300 | 2.84519000  | 2.80676900  |
| C | -2.28335100 | 2.49814900  | 2.96082800  |
| H | -3.67968600 | 0.86164600  | 2.94588500  |
| H | -0.63380800 | 3.87065400  | 2.99146400  |
| C | 1.47804800  | 2.31630600  | 2.48678500  |
| H | 2.13519200  | 1.59186700  | 2.00968400  |
| H | 1.78502900  | 2.42090200  | 3.53312100  |
| H | 1.62817300  | 3.28177100  | 1.99649600  |
| C | -3.32294400 | 3.52844300  | 3.31541500  |

|   |             |             |            |
|---|-------------|-------------|------------|
| H | -4.02806300 | 3.13849500  | 4.05385400 |
| H | -3.90031900 | 3.81111200  | 2.42920800 |
| H | -2.86371700 | 4.43340500  | 3.71814600 |
| C | -2.14106600 | -1.24785400 | 2.23565200 |
| H | -1.78819800 | -1.83826400 | 3.08604400 |
| H | -1.72017100 | -1.70021300 | 1.33304800 |
| H | -3.22906300 | -1.32906700 | 2.18490100 |

PRR

|   |             |             |             |
|---|-------------|-------------|-------------|
| C | -1.51198200 | 1.08032600  | 0.46473600  |
| O | -1.61394000 | 2.27676100  | 0.58856100  |
| C | -0.29309800 | 0.17329800  | 0.37463800  |
| C | 1.06194200  | 0.26800200  | 1.05671000  |
| H | -0.12828200 | 0.09011800  | -0.71109700 |
| H | 0.90027100  | 0.43982200  | 2.12436800  |
| C | 1.99816500  | 1.33655200  | 0.54305900  |
| C | 1.62828100  | 2.23332600  | -0.45906500 |
| C | 3.28007800  | 1.44571100  | 1.09631800  |
| C | 2.52189000  | 3.20365800  | -0.91398100 |
| H | 0.62957200  | 2.19678300  | -0.88341100 |
| C | 4.17361400  | 2.40887300  | 0.64431400  |
| H | 3.57992600  | 0.75754900  | 1.88315900  |
| C | 3.79791200  | 3.29062700  | -0.36962200 |
| H | 2.21318300  | 3.89247900  | -1.69409700 |
| H | 5.16459400  | 2.47424300  | 1.08261100  |
| H | 4.49461800  | 4.04283900  | -0.72539500 |
| H | 0.36705000  | -2.26450400 | -0.63100000 |
| C | -3.90251400 | 0.31851900  | -0.14657200 |
| C | -4.36874900 | -0.99549000 | -0.39074800 |
| C | -5.69320900 | -1.17157500 | -0.80835100 |

|   |             |             |             |
|---|-------------|-------------|-------------|
| C | -6.49688700 | -0.05138100 | -0.96962100 |
| C | -6.00512000 | 1.24227400  | -0.72531900 |
| C | -4.69670800 | 1.45074000  | -0.30926800 |
| C | -2.21344600 | -1.16031300 | 0.24380500  |
| C | -3.27379800 | -1.91662100 | -0.12857300 |
| H | -6.08254100 | -2.16621300 | -1.00154700 |
| H | -7.52571500 | -0.17374500 | -1.29188900 |
| H | -6.66147400 | 2.09526500  | -0.86255000 |
| H | -4.30103300 | 2.44042300  | -0.11382200 |
| H | -3.30768800 | -2.99358900 | -0.20492500 |
| N | -2.57576000 | 0.19620700  | 0.23688100  |
| H | -1.36922900 | -1.93623200 | 2.53902400  |
| C | -0.82315500 | -1.19281600 | 0.81951300  |
| O | -0.93824500 | -1.12418200 | 2.24261000  |
| C | 0.33904100  | -2.09575600 | 0.44938300  |
| C | 1.57537800  | -1.24818800 | 0.91616800  |
| H | 0.30402800  | -3.06614900 | 0.94978900  |
| H | 1.85544200  | -1.58092900 | 1.91839700  |
| C | 2.77095600  | -1.44416600 | 0.01355100  |
| C | 3.96385400  | -1.95859300 | 0.52315200  |
| C | 2.71887000  | -1.10565000 | -1.34362400 |
| C | 5.07873800  | -2.13288200 | -0.29575500 |
| H | 4.02085600  | -2.22211700 | 1.57646900  |
| C | 3.82882500  | -1.27089400 | -2.16397600 |
| H | 1.80384100  | -0.69328400 | -1.76320600 |
| C | 5.01470600  | -1.78740200 | -1.64168900 |
| H | 5.99660200  | -2.53596800 | 0.12061500  |
| H | 3.77096400  | -0.99466600 | -3.21210800 |
| H | 5.88131200  | -1.91727700 | -2.28202800 |



PRS

|   |             |             |             |
|---|-------------|-------------|-------------|
| C | -1.36776700 | -0.98309100 | -0.70383800 |
| O | -1.32790600 | -1.45199800 | -1.81718200 |
| C | -0.26999700 | -0.95304900 | 0.35514400  |
| C | 1.10025700  | -0.45641200 | -0.16253200 |
| H | -0.20743200 | -1.96070200 | 0.78186000  |
| H | 0.96675500  | -0.06468800 | -1.17835000 |
| C | 2.19287000  | -1.49709300 | -0.19316300 |
| C | 2.96002800  | -1.69265100 | -1.34096800 |
| C | 2.48617400  | -2.24759100 | 0.95099300  |
| C | 3.99579600  | -2.62563300 | -1.35336000 |
| H | 2.74234400  | -1.10948000 | -2.23186600 |
| C | 3.51838700  | -3.17951100 | 0.94227600  |
| H | 1.90033600  | -2.09357300 | 1.85610000  |
| C | 4.27616900  | -3.37210000 | -0.21268200 |
| H | 4.58161100  | -2.76868700 | -2.25592000 |
| H | 3.73445100  | -3.75523200 | 1.83675800  |
| H | 5.08161000  | -4.09948700 | -0.22079500 |
| H | -0.35972800 | 1.84240600  | 0.28263600  |
| C | -3.80016400 | -0.16923100 | -0.48525200 |
| C | -4.40369100 | 0.49710400  | 0.60749400  |
| C | -5.76785800 | 0.80373200  | 0.53346700  |
| C | -6.47223200 | 0.44199900  | -0.60689000 |
| C | -5.84566100 | -0.22228800 | -1.67542300 |
| C | -4.49452000 | -0.54097700 | -1.63317200 |
| C | -2.23149800 | 0.20000300  | 1.12040100  |
| C | -3.38025100 | 0.72172100  | 1.61564000  |
| H | -6.26314100 | 1.31596600  | 1.35210500  |
| H | -7.52953100 | 0.67559400  | -0.67746400 |
| H | -6.42787000 | -0.49027500 | -2.55069800 |

|     |             |             |             |
|-----|-------------|-------------|-------------|
| H   | -3.99256100 | -1.05123100 | -2.44654600 |
| H   | -3.50759700 | 1.21741800  | 2.56672800  |
| N   | -2.46728100 | -0.34914900 | -0.13952900 |
| H   | -0.98611200 | -1.13045800 | 2.95571800  |
| C   | -0.76551900 | 0.05943300  | 1.43347900  |
| O   | -0.48253100 | -0.33015600 | 2.75703300  |
| C   | 0.07143000  | 1.31162900  | 1.13885100  |
| C   | 1.44523900  | 0.73423600  | 0.77915200  |
| H   | 0.08697100  | 1.98772500  | 1.99651600  |
| H   | 1.87482300  | 0.31480200  | 1.69652800  |
| C   | 2.44214200  | 1.69551600  | 0.18067400  |
| C   | 3.72807900  | 1.80053000  | 0.71431500  |
| C   | 2.11587400  | 2.47273200  | -0.93639200 |
| C   | 4.66559400  | 2.66720800  | 0.15567600  |
| H   | 3.99555500  | 1.19516700  | 1.57651200  |
| C   | 3.04853900  | 3.33977800  | -1.49693100 |
| H   | 1.12408700  | 2.40012700  | -1.37669900 |
| C   | 4.32730900  | 3.44116500  | -0.95078600 |
| H   | 5.65959100  | 2.73735300  | 0.58617500  |
| H   | 2.77749600  | 3.93679800  | -2.36195400 |
| H   | 5.05444500  | 4.11877700  | -1.38650400 |
| PSR |             |             |             |
| C   | -1.40240700 | 1.19466600  | -0.31968500 |
| O   | -1.37413000 | 1.99821600  | -1.22225500 |
| C   | -0.29334000 | 0.83090400  | 0.65778700  |
| C   | 1.03193100  | 0.42309800  | -0.02476500 |
| H   | -0.15787700 | 1.67294300  | 1.34404900  |
| H   | 0.81455300  | 0.12364600  | -1.05847100 |
| C   | 2.10416400  | 1.48368400  | -0.05635500 |

|   |             |             |             |
|---|-------------|-------------|-------------|
| C | 2.75628800  | 1.79347100  | -1.25024300 |
| C | 2.50194700  | 2.13420000  | 1.11643700  |
| C | 3.77932800  | 2.73934600  | -1.27838800 |
| H | 2.45859900  | 1.28781400  | -2.16514700 |
| C | 3.52251500  | 3.07904200  | 1.09229100  |
| H | 2.00904400  | 1.89892100  | 2.05783300  |
| C | 4.16409700  | 3.38543100  | -0.10732500 |
| H | 4.27430000  | 2.97029400  | -2.21635900 |
| H | 3.81808500  | 3.57761900  | 2.01004400  |
| H | 4.95954500  | 4.12353500  | -0.12720900 |
| H | -0.27972300 | -1.97385500 | 0.06390900  |
| C | -3.80048300 | 0.27237600  | -0.42779600 |
| C | -4.38487900 | -0.74478000 | 0.36270600  |
| C | -5.72614400 | -1.07883700 | 0.13854000  |
| C | -6.42726800 | -0.39807100 | -0.84772500 |
| C | -5.81961200 | 0.61003200  | -1.61565300 |
| C | -4.49151500 | 0.96432900  | -1.41897500 |
| C | -2.24619300 | -0.51679000 | 1.03415500  |
| C | -3.37035600 | -1.23317000 | 1.28231800  |
| H | -6.20679600 | -1.85541500 | 0.72499000  |
| H | -7.46722000 | -0.64724100 | -1.03191900 |
| H | -6.39859600 | 1.12144200  | -2.37735600 |
| H | -4.00487200 | 1.73881900  | -1.99976800 |
| H | -3.49261600 | -2.01762500 | 2.01506500  |
| N | -2.48897500 | 0.39598400  | 0.00963500  |
| H | -0.94701700 | -0.88110400 | 3.34037600  |
| C | -0.80296500 | -0.39763100 | 1.46078300  |
| O | -0.63573500 | -0.11765400 | 2.83663900  |
| C | 0.10529800  | -1.55045000 | 0.99854100  |
| C | 1.44994100  | -0.85381800 | 0.75440800  |

|   |            |             |             |
|---|------------|-------------|-------------|
| H | 0.15503300 | -2.35331000 | 1.73963800  |
| H | 1.83886200 | -0.53281100 | 1.72912100  |
| C | 2.51311400 | -1.66080300 | 0.05267100  |
| C | 3.80313300 | -1.73530700 | 0.58168500  |
| C | 2.24722200 | -2.31223300 | -1.15671900 |
| C | 4.80405600 | -2.45046600 | -0.07257600 |
| H | 4.02361300 | -1.22277900 | 1.51450900  |
| C | 3.24375600 | -3.02795100 | -1.81327000 |
| H | 1.25293200 | -2.25993900 | -1.59407000 |
| C | 4.52630900 | -3.10048300 | -1.27178900 |
| H | 5.80066600 | -2.49833600 | 0.35492800  |
| H | 3.01963500 | -3.52955100 | -2.74942800 |
| H | 5.30396900 | -3.65816800 | -1.78360100 |

PSS

|   |             |            |             |
|---|-------------|------------|-------------|
| C | 1.50465700  | 1.08253300 | 0.44646700  |
| O | 1.60485600  | 2.28245600 | 0.53637100  |
| C | 0.29327500  | 0.16616300 | 0.38319600  |
| C | -1.06145700 | 0.26042200 | 1.06278900  |
| H | 0.12738800  | 0.07132800 | -0.70201400 |
| H | -0.90143700 | 0.42221700 | 2.13258500  |
| C | -1.99985200 | 1.32988100 | 0.55607700  |
| C | -1.64177800 | 2.21874800 | -0.45739800 |
| C | -3.27494100 | 1.44372300 | 1.12398500  |
| C | -2.53975700 | 3.18714200 | -0.90751000 |
| H | -0.64912500 | 2.17623100 | -0.89521100 |
| C | -4.17288300 | 2.40516600 | 0.67681600  |
| H | -3.56585400 | 0.76067900 | 1.91867400  |
| C | -3.80861100 | 3.27974900 | -0.34737800 |
| H | -2.24052900 | 3.86969300 | -1.69675600 |

|   |             |             |             |
|---|-------------|-------------|-------------|
| H | -5.15842400 | 2.47450800  | 1.12661000  |
| H | -4.50868200 | 4.03057300  | -0.69947400 |
| H | -0.34828600 | -2.25453300 | -0.63120700 |
| C | 3.89909600  | 0.32349300  | -0.14346100 |
| C | 4.37255900  | -0.98909100 | -0.37753500 |
| C | 5.69580700  | -1.16027100 | -0.80151200 |
| C | 6.48954200  | -0.03587900 | -0.98007200 |
| C | 5.98971500  | 1.25689500  | -0.74676100 |
| C | 4.68301500  | 1.46026000  | -0.32322000 |
| C | 2.21982900  | -1.16712200 | 0.26730900  |
| C | 3.28652300  | -1.91570300 | -0.10011100 |
| H | 6.09102800  | -2.15399700 | -0.98680200 |
| H | 7.51695800  | -0.15385300 | -1.30831900 |
| H | 6.63829600  | 2.11315200  | -0.89950300 |
| H | 4.28044000  | 2.44889600  | -0.13687700 |
| H | 3.32882900  | -2.99313900 | -0.16328100 |
| N | 2.57545200  | 0.19613600  | 0.25339400  |
| H | 1.62042500  | -0.72896100 | 2.57777300  |
| C | 0.82784800  | -1.20607400 | 0.83910200  |
| O | 0.90113900  | -1.29084300 | 2.25961800  |
| C | -0.33399700 | -2.09953500 | 0.45070700  |
| C | -1.57379300 | -1.25513300 | 0.91189800  |
| H | -0.29844100 | -3.07111500 | 0.94605300  |
| H | -1.86162200 | -1.59334900 | 1.91013900  |
| C | -2.76387700 | -1.44383600 | 0.00046000  |
| C | -3.96370600 | -1.94913400 | 0.50314700  |
| C | -2.70098200 | -1.10721800 | -1.35669100 |
| C | -5.07479100 | -2.11616100 | -0.32228200 |
| H | -4.02878100 | -2.21162500 | 1.55622700  |
| C | -3.80727500 | -1.26509500 | -2.18359000 |

|   |             |             |             |
|---|-------------|-------------|-------------|
| H | -1.78051600 | -0.70232900 | -1.77168300 |
| C | -5.00005500 | -1.77236700 | -1.66811900 |
| H | -5.99792100 | -2.51251200 | 0.08889700  |
| H | -3.74097300 | -0.99050600 | -3.23164900 |
| H | -5.86357000 | -1.89653900 | -2.31372700 |

TS6RS'

|   |             |             |             |
|---|-------------|-------------|-------------|
| C | -5.85366200 | -1.34134300 | -0.94488200 |
| C | -4.59825900 | -1.50159500 | -0.36312500 |
| C | -4.35028100 | -2.50594100 | 0.56743600  |
| C | -5.39591000 | -3.35929900 | 0.91249500  |
| C | -6.65740200 | -3.20674000 | 0.33103100  |
| C | -6.89493200 | -2.19906800 | -0.60171400 |
| C | -5.85966200 | -0.19334300 | -1.92173000 |
| C | -4.53442800 | 0.55829300  | -1.66718000 |
| C | -3.62937600 | -0.46468000 | -0.88590400 |
| H | -3.36161400 | -2.61650600 | 1.00299600  |
| H | -5.23049400 | -4.14838400 | 1.63861500  |
| H | -7.46233000 | -3.87826600 | 0.61226400  |
| H | -7.87771900 | -2.08028300 | -1.04794900 |
| H | -6.70625700 | 0.48695100  | -1.79095200 |
| H | -4.04003300 | 0.85344400  | -2.59278900 |
| H | -5.89291300 | -0.56125800 | -2.95245400 |
| H | -2.84494800 | -0.86814200 | -1.53183800 |
| N | -2.93413300 | 0.22205100  | 0.19781600  |
| O | -4.74285900 | 1.78524500  | -0.97463700 |
| C | -1.66599700 | 0.11492000  | 0.60599900  |
| C | -3.50156700 | 1.24497700  | 0.90063800  |
| N | -1.52262300 | 1.02250200  | 1.56987600  |
| N | -2.66145100 | 1.76041100  | 1.75256900  |

|   |             |             |             |
|---|-------------|-------------|-------------|
| C | -4.84939500 | 1.68862900  | 0.43569300  |
| H | -5.62892900 | 0.98070900  | 0.74573300  |
| H | -5.08228800 | 2.67895400  | 0.82517000  |
| C | -0.31311500 | 1.26934200  | 2.30567000  |
| C | 0.40748300  | 2.42793000  | 1.99192500  |
| C | 0.15229200  | 0.27816100  | 3.17149800  |
| C | 1.67447600  | 2.55154000  | 2.55414700  |
| C | 1.42939600  | 0.45339100  | 3.70648300  |
| C | 2.20801700  | 1.56631800  | 3.39182200  |
| H | 2.27226200  | 3.42492400  | 2.30331800  |
| H | 1.83368200  | -0.31604900 | 4.35888600  |
| C | -0.66031600 | -0.95043800 | 3.49161100  |
| H | -0.55282400 | -1.71596000 | 2.71599600  |
| H | -1.72399200 | -0.71452200 | 3.58637300  |
| H | -0.31710900 | -1.38905300 | 4.43023900  |
| C | 3.60335400  | 1.71153000  | 3.93974300  |
| H | 3.88775500  | 0.83701300  | 4.52830600  |
| H | 3.68420800  | 2.59984700  | 4.57337400  |
| H | 4.32573700  | 1.82183100  | 3.12520700  |
| C | -0.15193400 | 3.46641400  | 1.05859700  |
| H | -1.00348500 | 3.98034700  | 1.51383900  |
| H | -0.49930200 | 3.00677200  | 0.12655000  |
| H | 0.61346500  | 4.20144600  | 0.80468000  |
| C | -0.69921400 | -0.95542100 | 0.15853600  |
| O | -1.12549600 | -2.09508700 | 0.14308700  |
| C | 0.73645500  | -0.54051800 | -0.10656000 |
| C | 1.71165700  | -1.71448800 | -0.26773600 |
| H | 1.09166100  | 0.15930400  | 0.65419400  |
| H | 1.11802100  | -2.61674000 | -0.46107800 |
| C | 2.52623800  | -1.95045300 | 0.98237800  |

|   |             |             |             |
|---|-------------|-------------|-------------|
| C | 2.02219500  | -2.81495500 | 1.95975400  |
| C | 3.71433800  | -1.26417900 | 1.25096200  |
| C | 2.67656600  | -2.98573500 | 3.17638700  |
| H | 1.10043900  | -3.35574400 | 1.75578900  |
| C | 4.37689100  | -1.43736900 | 2.46490500  |
| H | 4.13332000  | -0.58792500 | 0.51067300  |
| C | 3.85938600  | -2.29455400 | 3.43378500  |
| H | 2.26642000  | -3.66216200 | 3.92027300  |
| H | 5.30108800  | -0.89959000 | 2.65460900  |
| H | 4.37628900  | -2.42731400 | 4.37909400  |
| H | 1.67658500  | -0.31501500 | -3.35355600 |
| C | 1.05394700  | 3.68148800  | -2.16007300 |
| C | 2.21723300  | 3.49035100  | -1.36545000 |
| C | 3.03609200  | 4.59754000  | -1.08898500 |
| C | 2.68441400  | 5.83974500  | -1.59355500 |
| C | 1.52592100  | 6.00556700  | -2.37741800 |
| C | 0.69786200  | 4.93270200  | -2.67127200 |
| C | 1.11798700  | 1.52549600  | -1.53065800 |
| C | 2.23204000  | 2.10817800  | -0.97656200 |
| H | 3.93002600  | 4.48025600  | -0.48242200 |
| H | 3.30924500  | 6.70195100  | -1.38225100 |
| H | 1.27607500  | 6.99118600  | -2.75720700 |
| H | -0.19811700 | 5.05767900  | -3.27134400 |
| H | 2.95165400  | 1.62558100  | -0.32859900 |
| N | 0.42714400  | 2.46358800  | -2.25395500 |
| H | -0.49127200 | 2.23622400  | -2.61256600 |
| C | 0.52509700  | 0.13216100  | -1.49880900 |
| O | -0.83555400 | 0.17517300  | -1.72185500 |
| C | 1.32204200  | -0.81280600 | -2.44646200 |
| C | 2.45775600  | -1.37016900 | -1.57781700 |



|   |            |             |             |
|---|------------|-------------|-------------|
| H | 0.63572900 | -1.61797900 | -2.73578700 |
| H | 3.15710800 | -0.54566000 | -1.38676600 |
| C | 3.23973100 | -2.52379600 | -2.15692400 |
| C | 4.62678700 | -2.44370400 | -2.29794700 |
| C | 2.59868300 | -3.70422300 | -2.55045500 |
| C | 5.35844400 | -3.50869700 | -2.82012000 |
| H | 5.13902400 | -1.53330400 | -1.99612400 |
| C | 3.32437100 | -4.77054000 | -3.07141100 |
| H | 1.51927300 | -3.79028000 | -2.45046500 |
| C | 4.70893400 | -4.67670400 | -3.20865000 |
| H | 6.43603300 | -3.42424500 | -2.92215900 |
| H | 2.80850900 | -5.67744800 | -3.37165300 |
| H | 5.27491300 | -5.50859900 | -3.61569400 |

M6RS'

|   |            |             |             |
|---|------------|-------------|-------------|
| C | 5.24231100 | -1.16343400 | 1.89083300  |
| C | 3.85619300 | -1.08191700 | 1.80115400  |
| C | 3.01648500 | -1.76452500 | 2.67767900  |
| C | 3.60721400 | -2.54235500 | 3.67105900  |
| C | 4.99888600 | -2.62733200 | 3.77549800  |
| C | 5.82571500 | -1.94102000 | 2.88893600  |
| C | 5.91415700 | -0.33545200 | 0.82540000  |
| C | 4.77119000 | 0.16727700  | -0.09283100 |
| C | 3.43488400 | -0.19172100 | 0.65642500  |
| H | 1.93228300 | -1.69367200 | 2.57762400  |
| H | 2.98239400 | -3.08919300 | 4.36985900  |
| H | 5.44084900 | -3.24018300 | 4.55489500  |
| H | 6.90592900 | -2.01644400 | 2.97146400  |
| H | 6.64272800 | -0.90350000 | 0.23742900  |
| H | 4.82111300 | 1.24629500  | -0.24068100 |

|   |             |             |             |
|---|-------------|-------------|-------------|
| H | 6.45019600  | 0.51234100  | 1.26269900  |
| H | 2.90522500  | 0.69811200  | 0.99388900  |
| N | 2.51176700  | -0.91021500 | -0.23321000 |
| O | 4.85230900  | -0.36446500 | -1.40736400 |
| C | 1.17664900  | -1.05991200 | -0.17604800 |
| C | 2.97403900  | -1.73368200 | -1.22516700 |
| N | 0.88810200  | -1.94212900 | -1.13357000 |
| N | 2.00086300  | -2.36808000 | -1.80639100 |
| C | 4.43840500  | -1.71224400 | -1.51385900 |
| H | 4.97838900  | -2.36364300 | -0.81202400 |
| H | 4.63103600  | -2.05029800 | -2.53181700 |
| C | -0.39795800 | -2.51107700 | -1.44429700 |
| C | -1.15011200 | -1.97473400 | -2.48829900 |
| C | -0.79877200 | -3.63123500 | -0.70320000 |
| C | -2.38002300 | -2.57780100 | -2.76366600 |
| C | -2.03046100 | -4.19272200 | -1.01911900 |
| C | -2.83386400 | -3.67783300 | -2.04201900 |
| H | -2.99857900 | -2.16577700 | -3.55682900 |
| H | -2.36987200 | -5.06070600 | -0.45887200 |
| C | 0.08903400  | -4.20441500 | 0.36627900  |
| H | 0.23336100  | -3.45801200 | 1.15354700  |
| H | 1.06926200  | -4.46933000 | -0.04450000 |
| H | -0.35860600 | -5.10350900 | 0.79318400  |
| C | -4.14544400 | -4.33737200 | -2.37839400 |
| H | -4.70198900 | -4.58514200 | -1.47073500 |
| H | -3.97644400 | -5.27010200 | -2.92660300 |
| H | -4.76738500 | -3.68519700 | -2.99492800 |
| C | -0.66898900 | -0.82169800 | -3.32981600 |
| H | -0.29858800 | -1.18397800 | -4.29374800 |
| H | 0.14115500  | -0.26218200 | -2.85579500 |

|   |             |             |             |
|---|-------------|-------------|-------------|
| H | -1.49673800 | -0.13412600 | -3.52723100 |
| C | 0.15105100  | -0.49891000 | 0.84994800  |
| O | -0.17726200 | -1.37580400 | 1.71708800  |
| C | -0.91603800 | 0.39317600  | 0.10009100  |
| C | -2.31912200 | 0.36853300  | 0.70029600  |
| H | -0.91285100 | 0.31681100  | -0.98819800 |
| H | -2.27885700 | -0.27247700 | 1.59098200  |
| C | -3.40188300 | -0.13611200 | -0.22119100 |
| C | -4.22910600 | -1.19401200 | 0.15663700  |
| C | -3.61730600 | 0.46710000  | -1.46647000 |
| C | -5.24944400 | -1.63783200 | -0.68311600 |
| H | -4.07048800 | -1.67267100 | 1.11934300  |
| C | -4.63229600 | 0.02690300  | -2.30962700 |
| H | -2.98336500 | 1.29581700  | -1.77845800 |
| C | -5.45510800 | -1.02901300 | -1.91792600 |
| H | -5.88507400 | -2.46126100 | -0.37121600 |
| H | -4.78348000 | 0.50778900  | -3.27159700 |
| H | -6.25062200 | -1.37345000 | -2.57179500 |
| H | -1.04872100 | 3.35958800  | 1.71342300  |
| C | 2.03372700  | 4.04749700  | -0.88020000 |
| C | 1.24384800  | 3.73386900  | -2.01489800 |
| C | 1.51954400  | 4.37861600  | -3.23160200 |
| C | 2.55262500  | 5.29913900  | -3.28526000 |
| C | 3.32483400  | 5.59420400  | -2.14389300 |
| C | 3.07945500  | 4.97467900  | -0.92916000 |
| C | 0.51456700  | 2.50510600  | -0.26527400 |
| C | 0.28729500  | 2.74649400  | -1.59517000 |
| H | 0.93007000  | 4.15494500  | -4.11576400 |
| H | 2.77464400  | 5.80447100  | -4.21961700 |
| H | 4.12670400  | 6.32174800  | -2.21799700 |

|   |             |            |             |
|---|-------------|------------|-------------|
| H | 3.67089500  | 5.20219200 | -0.04800900 |
| H | -0.47471100 | 2.27919400 | -2.20346200 |
| N | 1.56316500  | 3.28934700 | 0.16648200  |
| H | 1.93408200  | 3.27829100 | 1.10471500  |
| C | -0.16728400 | 1.58985600 | 0.69726600  |
| O | 0.78831600  | 0.75993200 | 1.38515200  |
| C | -1.15772500 | 2.27277600 | 1.66625100  |
| C | -2.54042800 | 1.83978200 | 1.15158500  |
| H | -0.97424100 | 1.85997400 | 2.66329300  |
| H | -2.76178200 | 2.42991000 | 0.25142100  |
| C | -3.68497200 | 2.00667500 | 2.12024200  |
| C | -4.82753300 | 2.72354900 | 1.75977300  |
| C | -3.64285300 | 1.41062200 | 3.38583700  |
| C | -5.89910300 | 2.85427500 | 2.64169900  |
| H | -4.87760400 | 3.18183200 | 0.77516900  |
| C | -4.70964900 | 1.53823100 | 4.26926600  |
| H | -2.76785500 | 0.83711700 | 3.68241300  |
| C | -5.84265100 | 2.26302400 | 3.90031300  |
| H | -6.77789700 | 3.41751400 | 2.34325400  |
| H | -4.65791000 | 1.07005900 | 5.24741600  |
| H | -6.67476100 | 2.36293000 | 4.58987600  |
